# Supplementary material
Source: PubMed Central journal article supplement (PMC2697663)

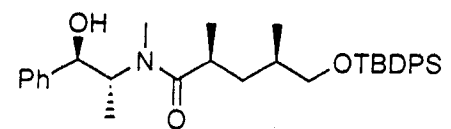

(-)-12

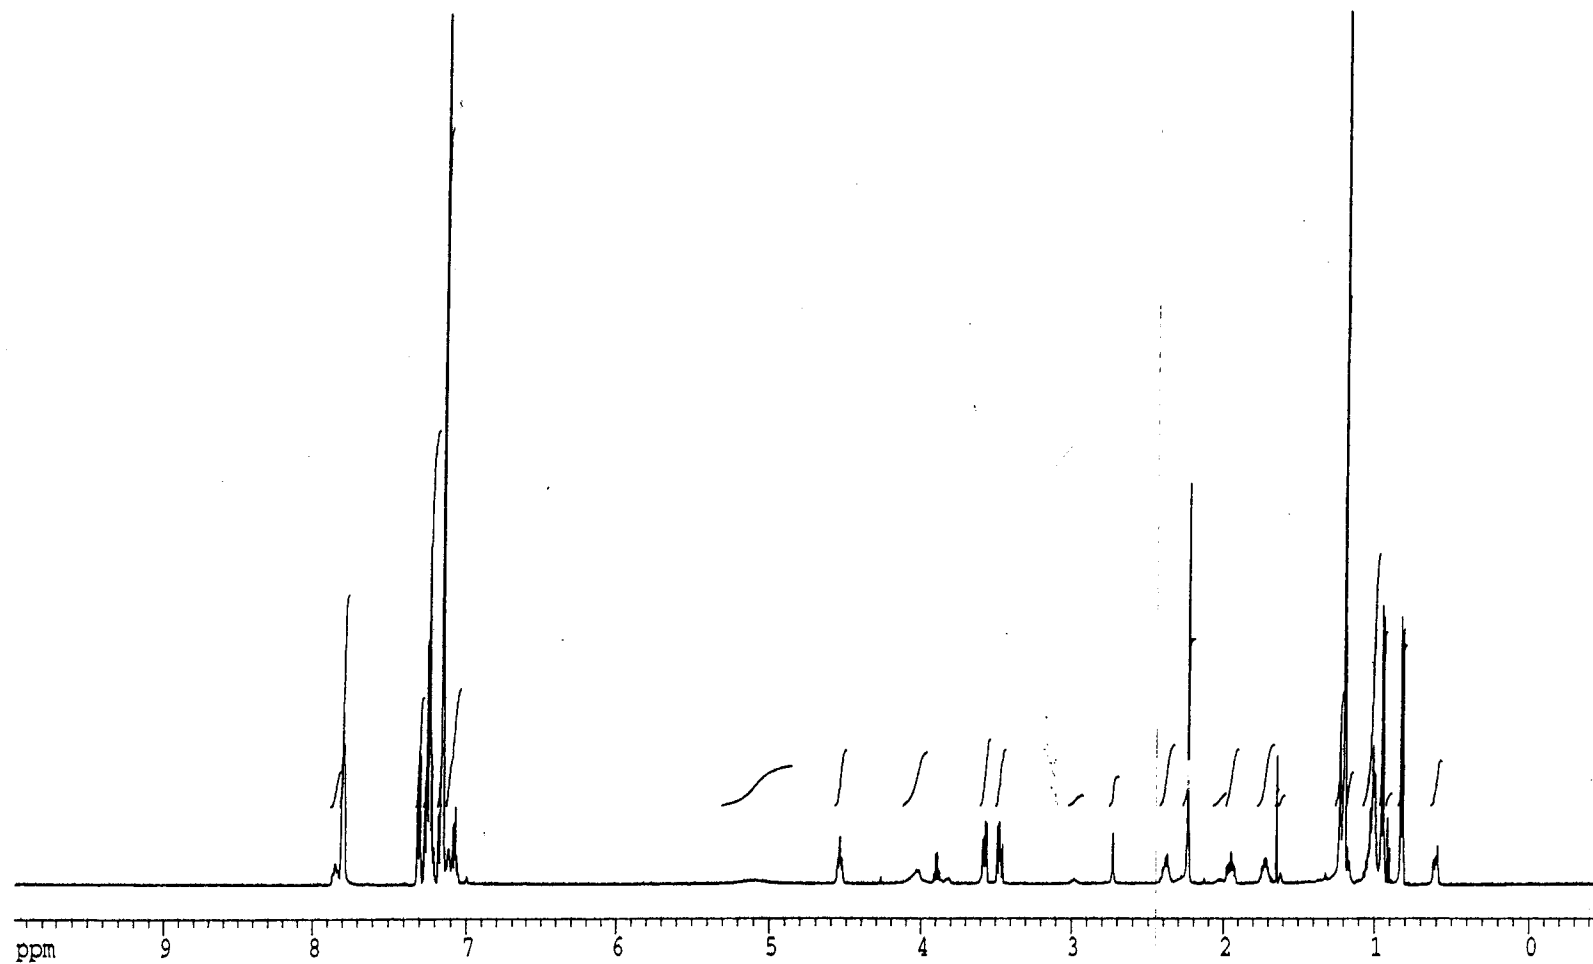

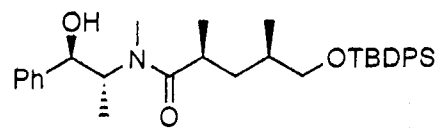

(-)-12

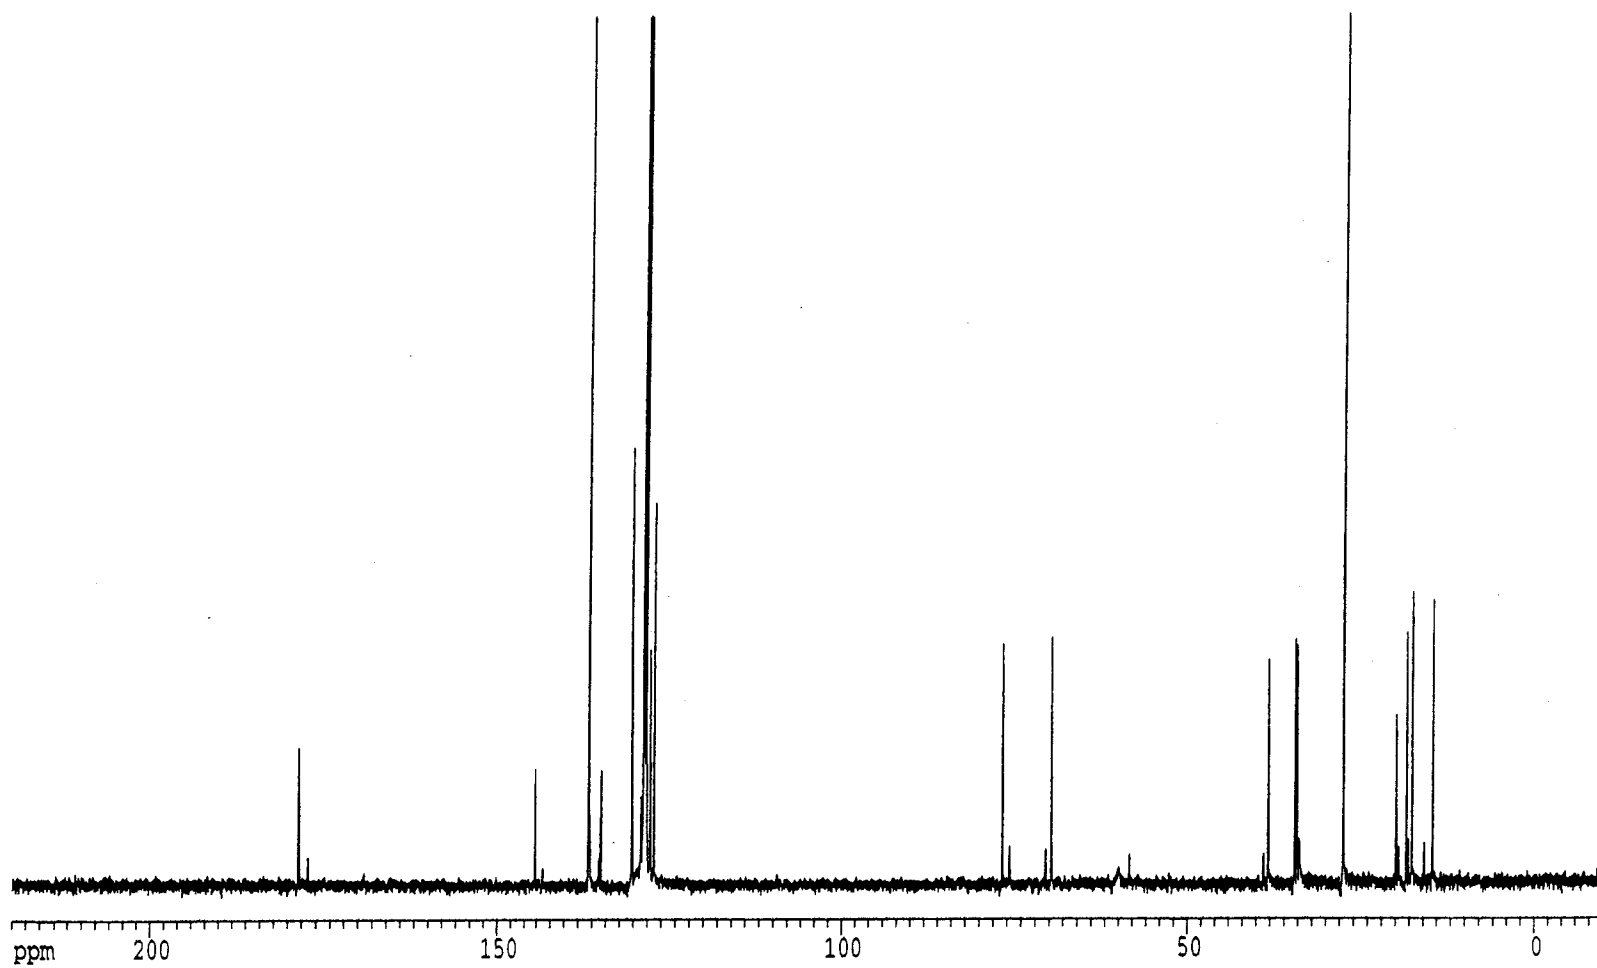

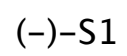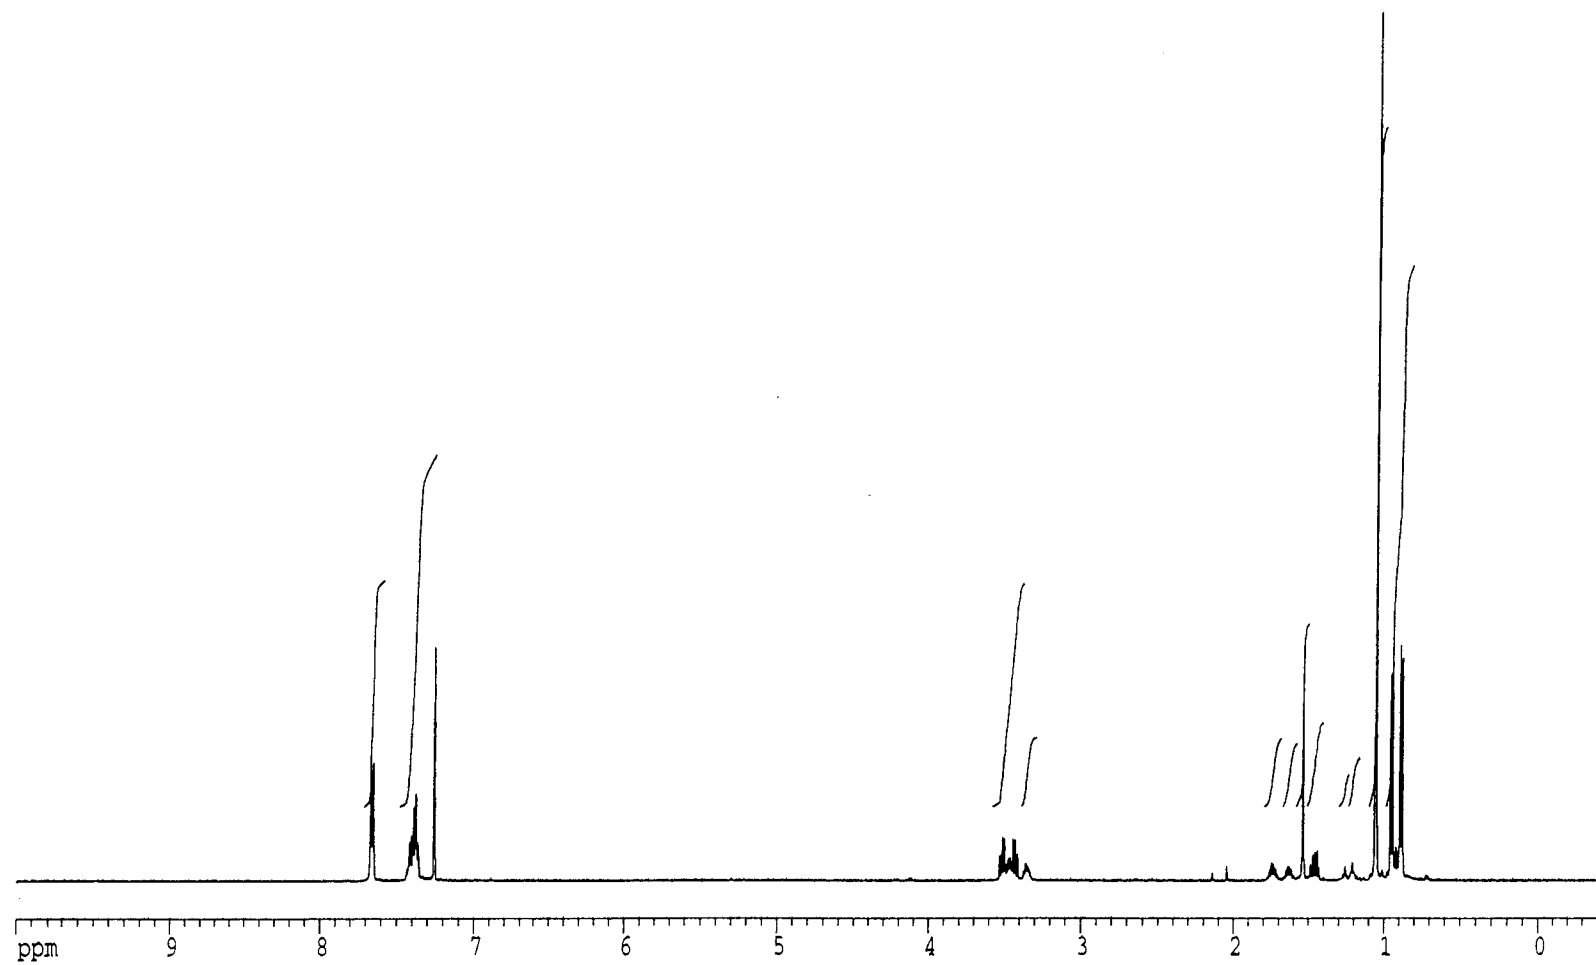

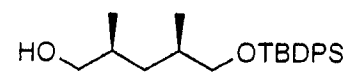

(-)-S1

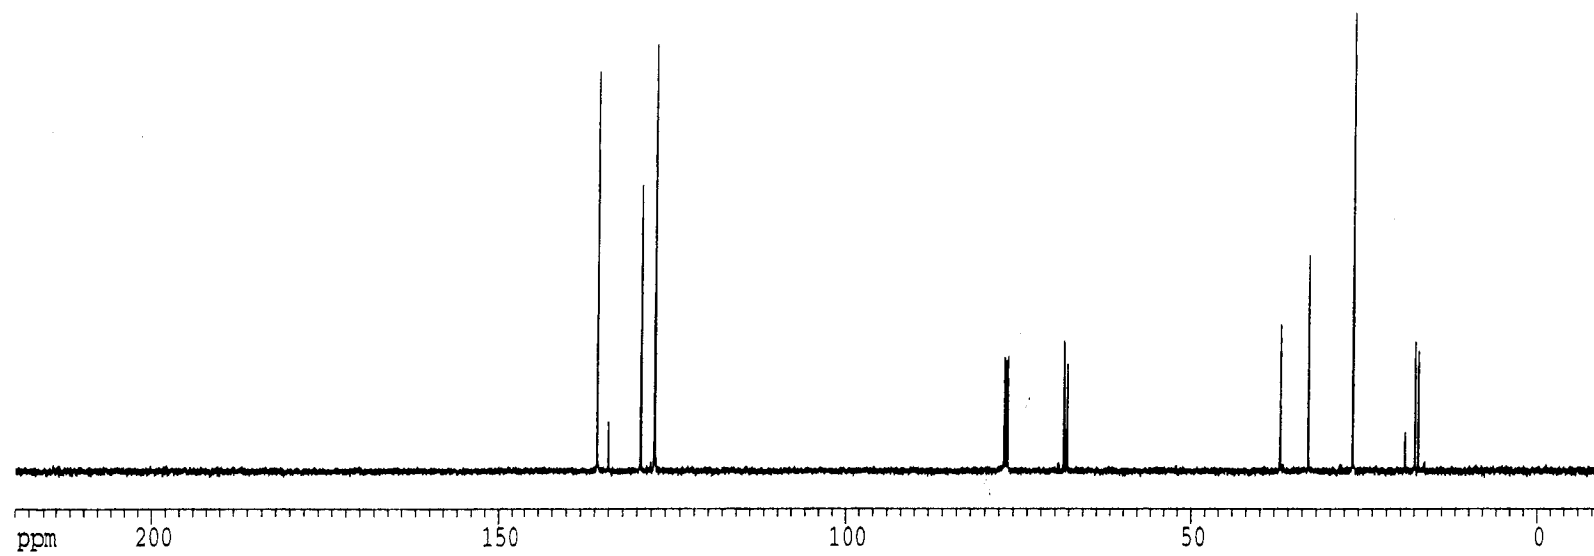

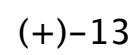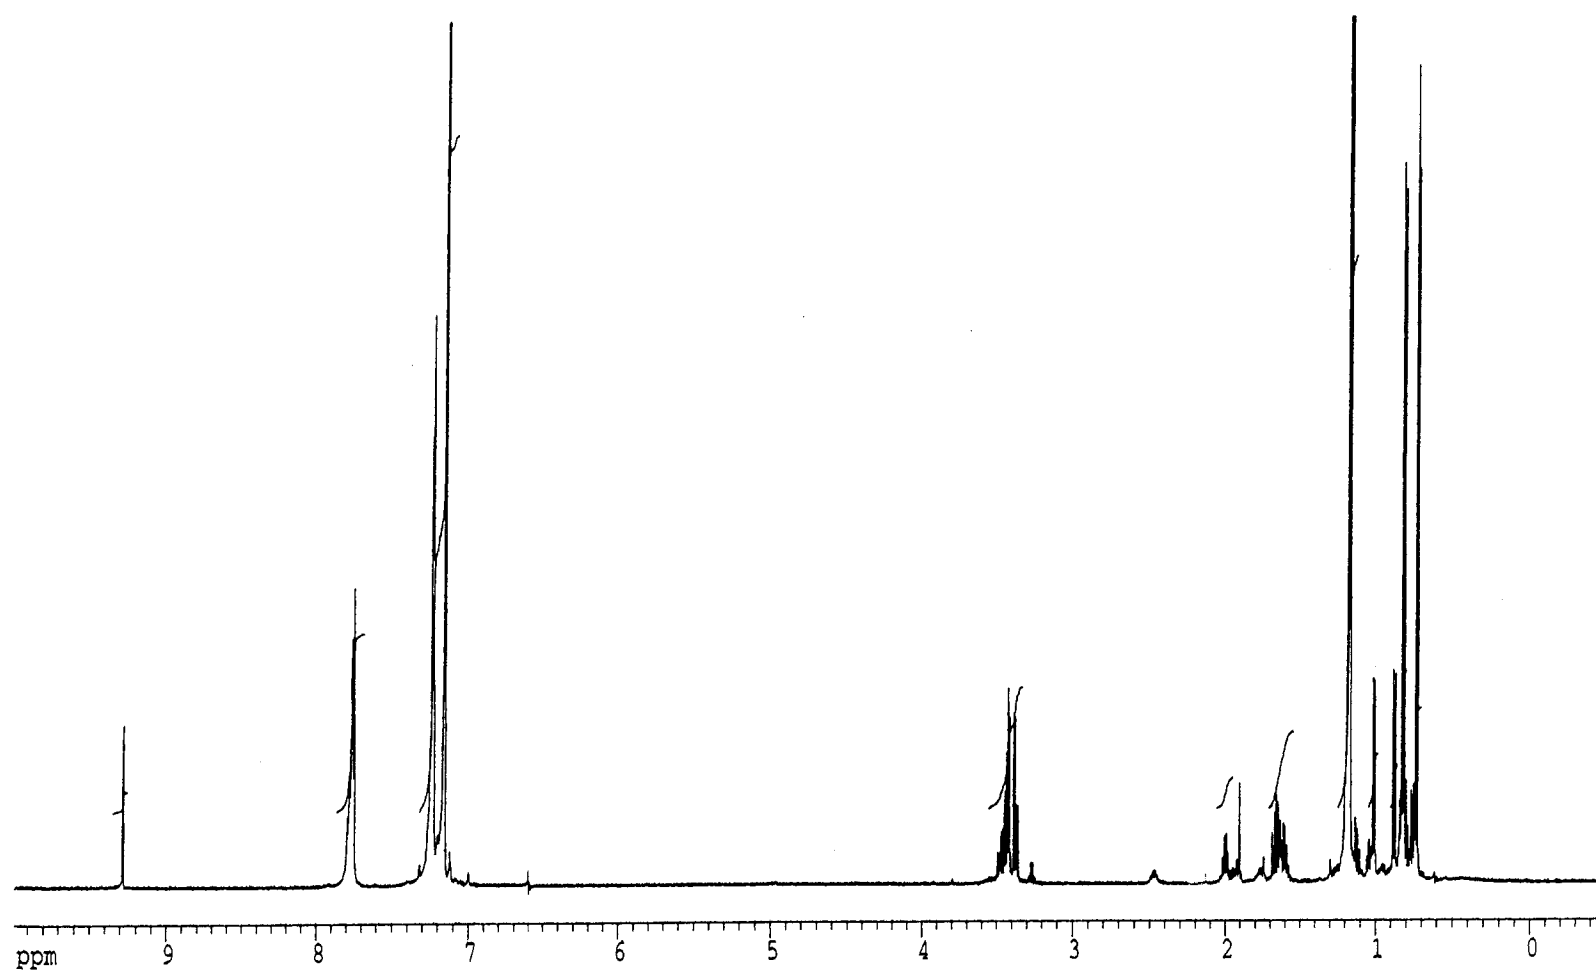

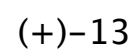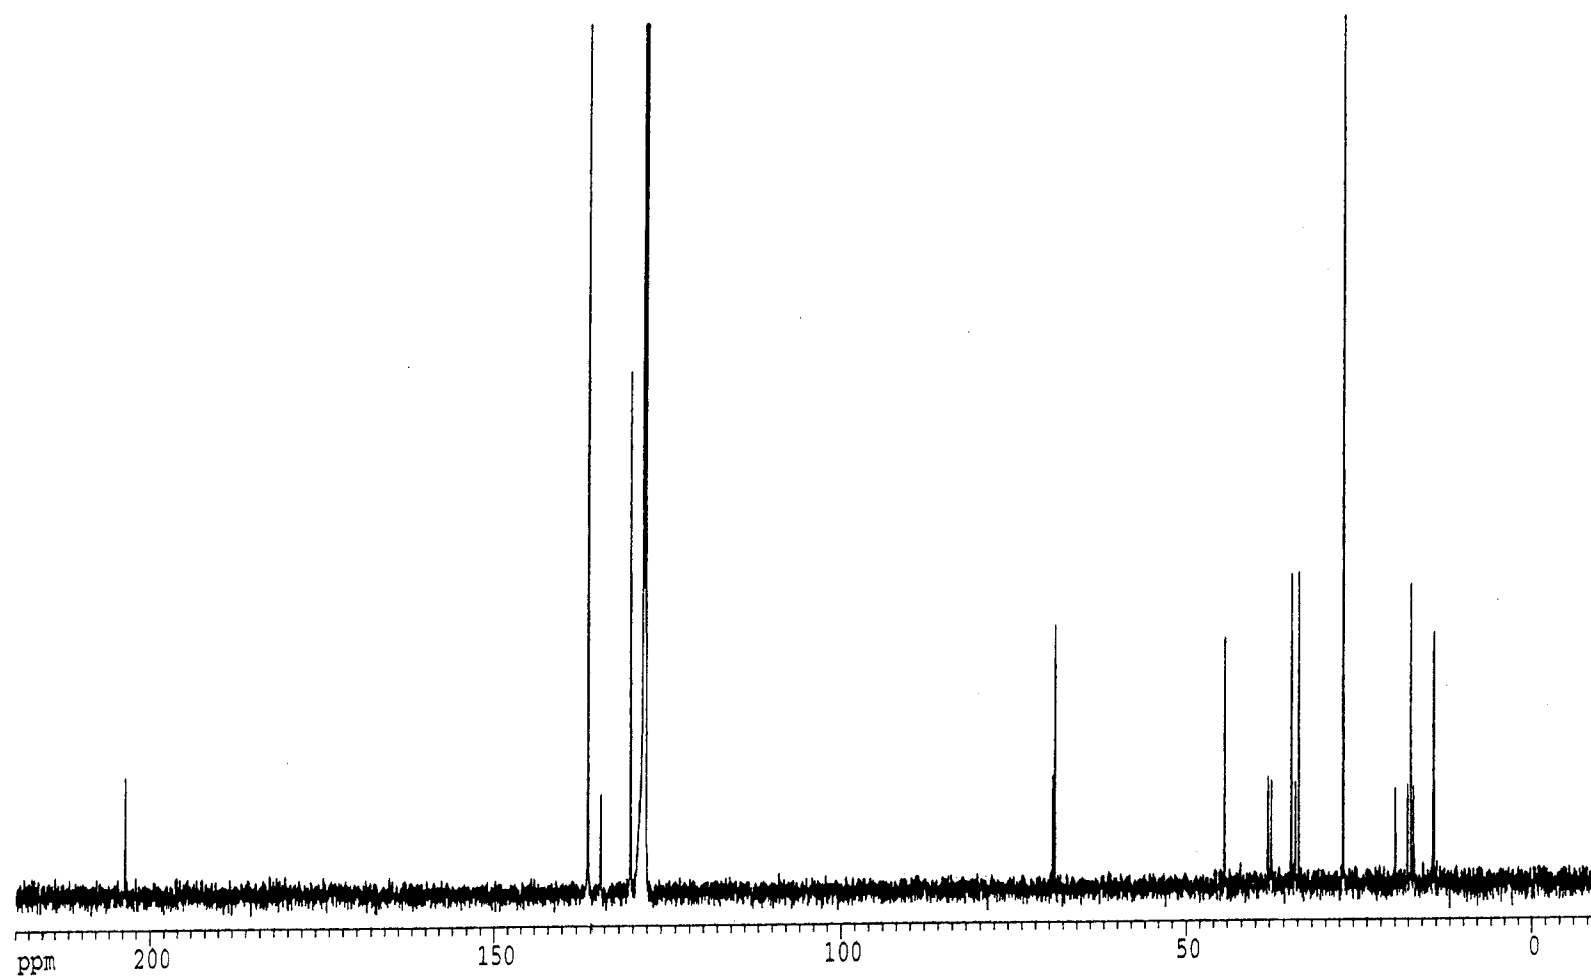

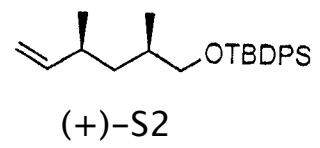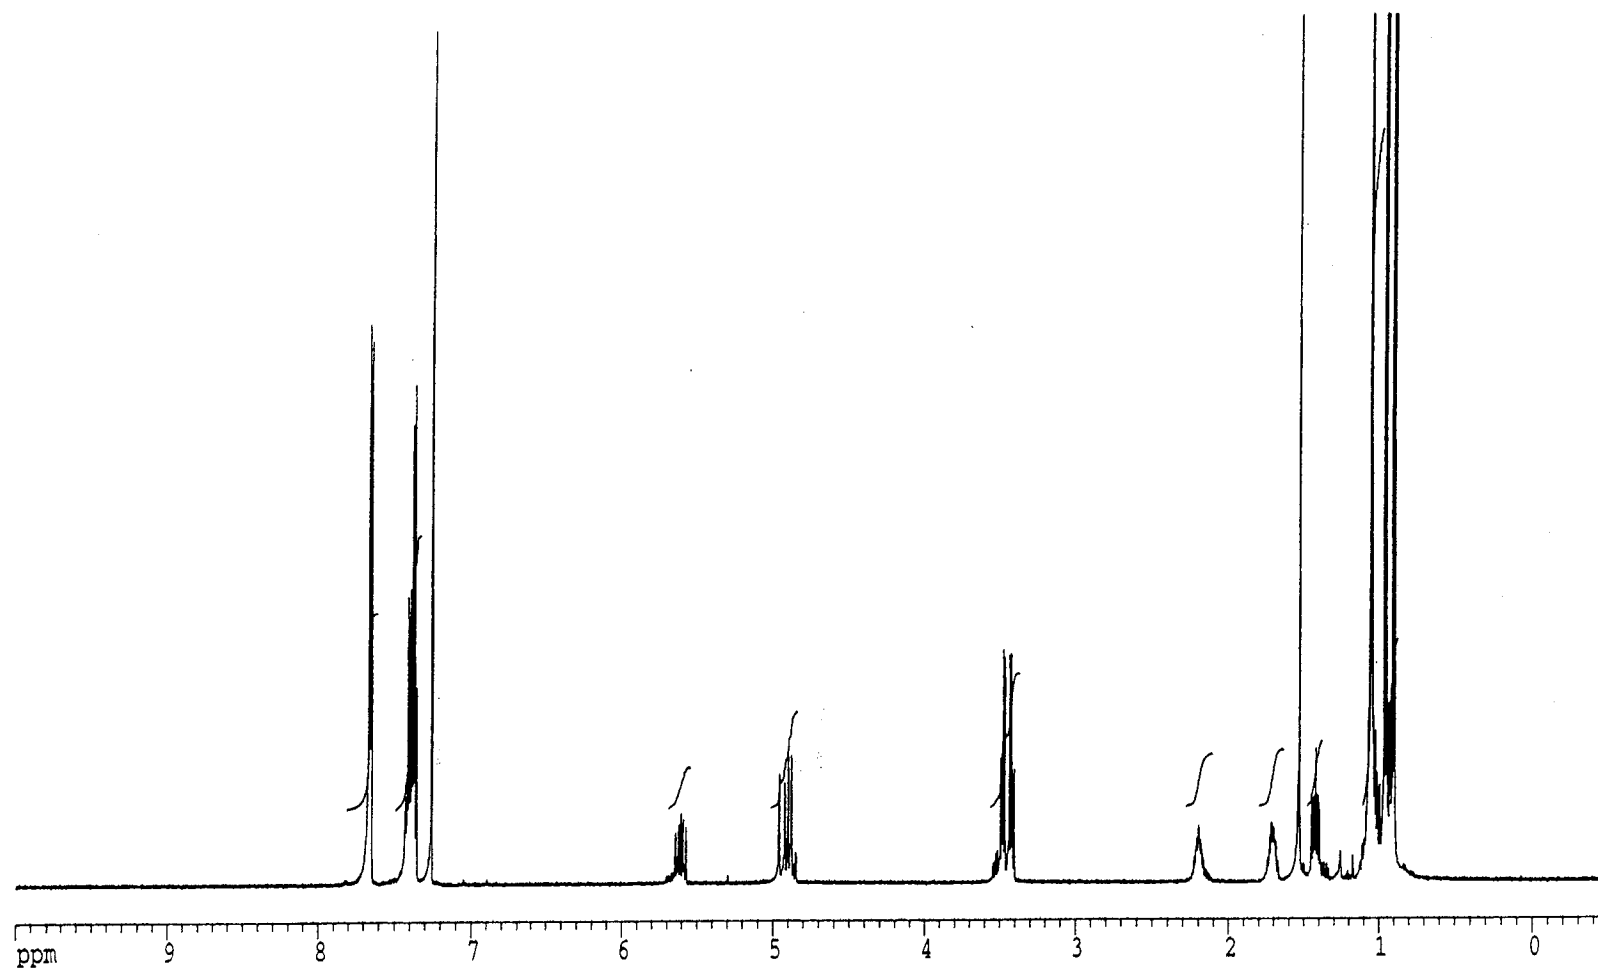

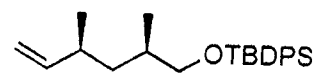

(+)-S2

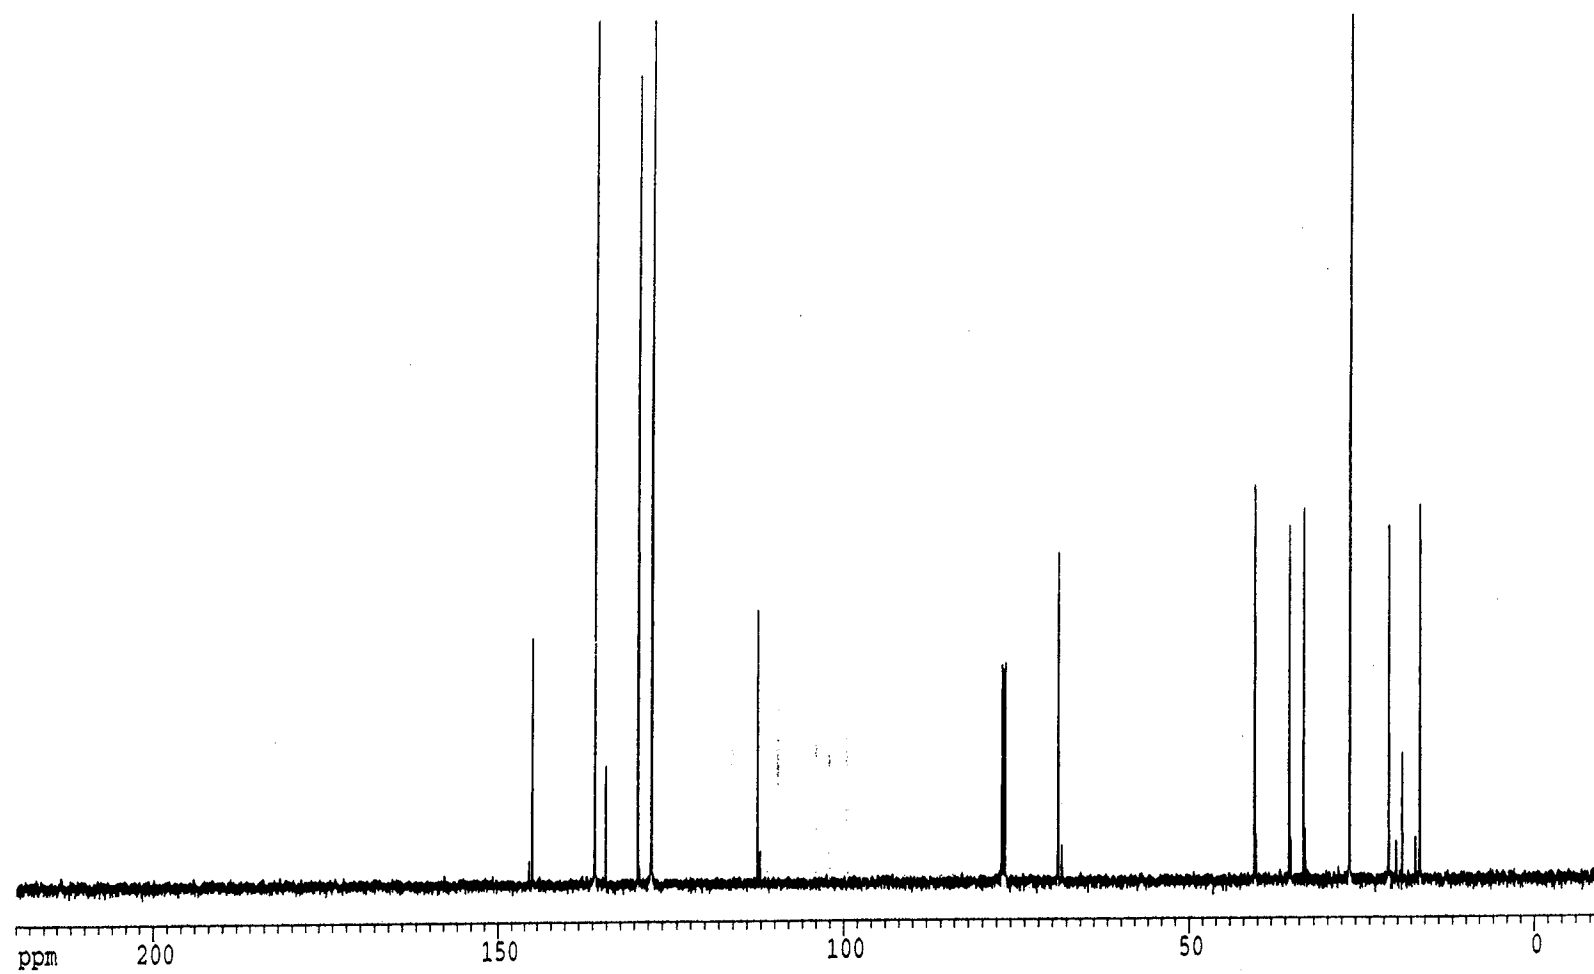

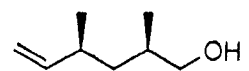

(+)-S3

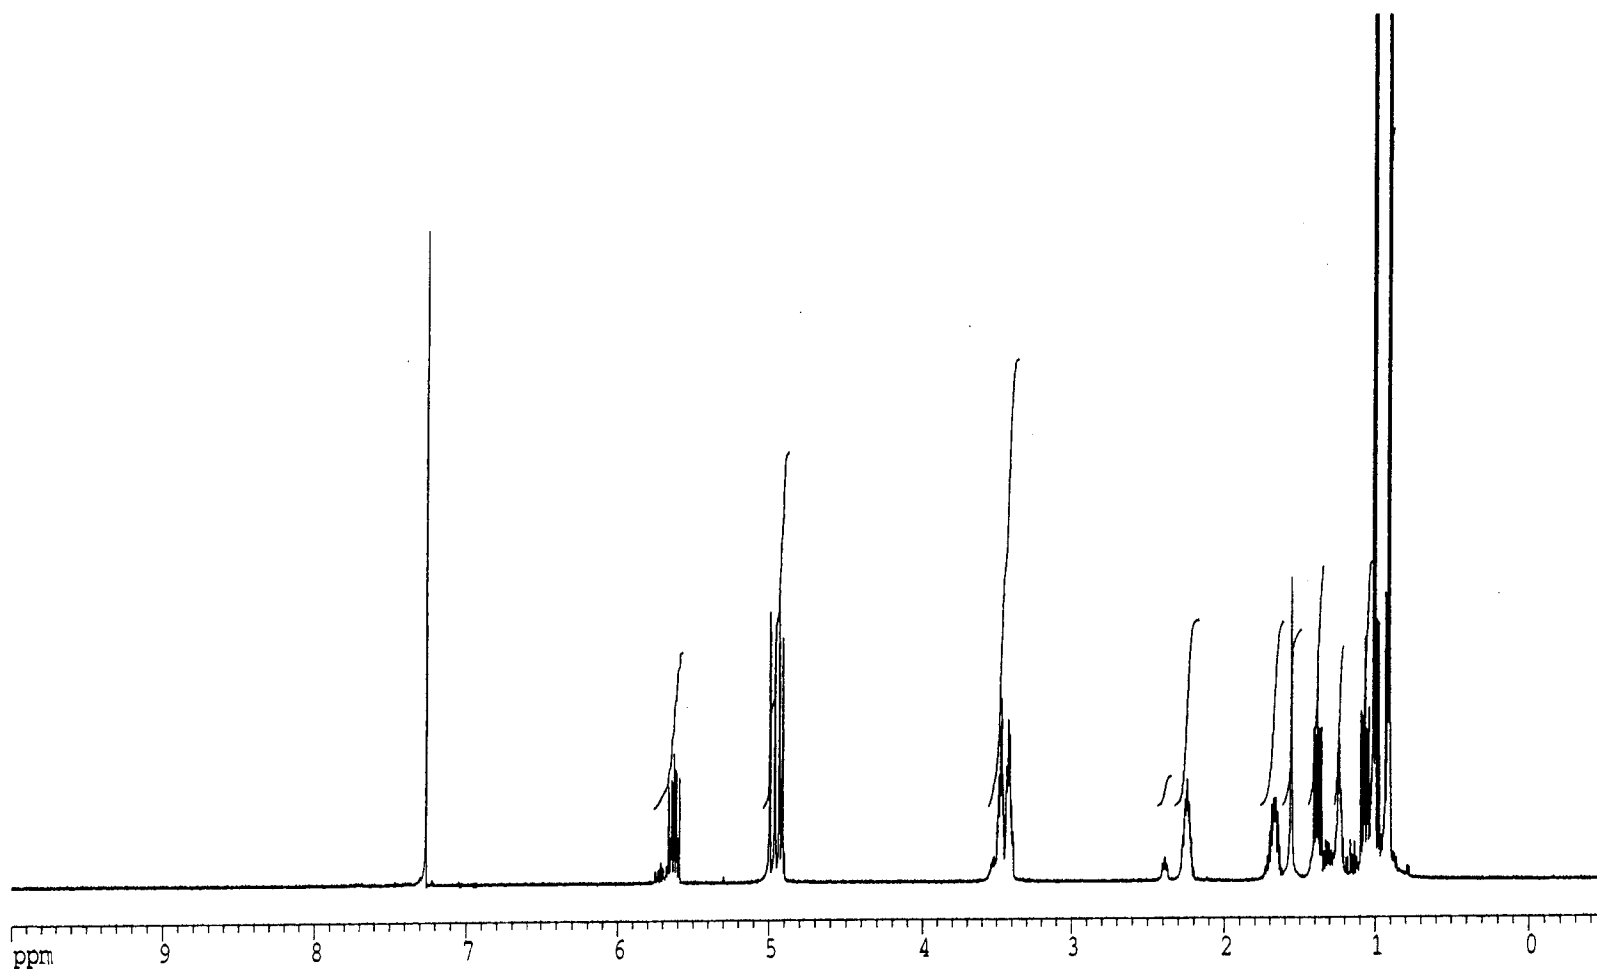

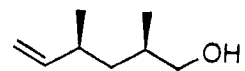

(+)-S3

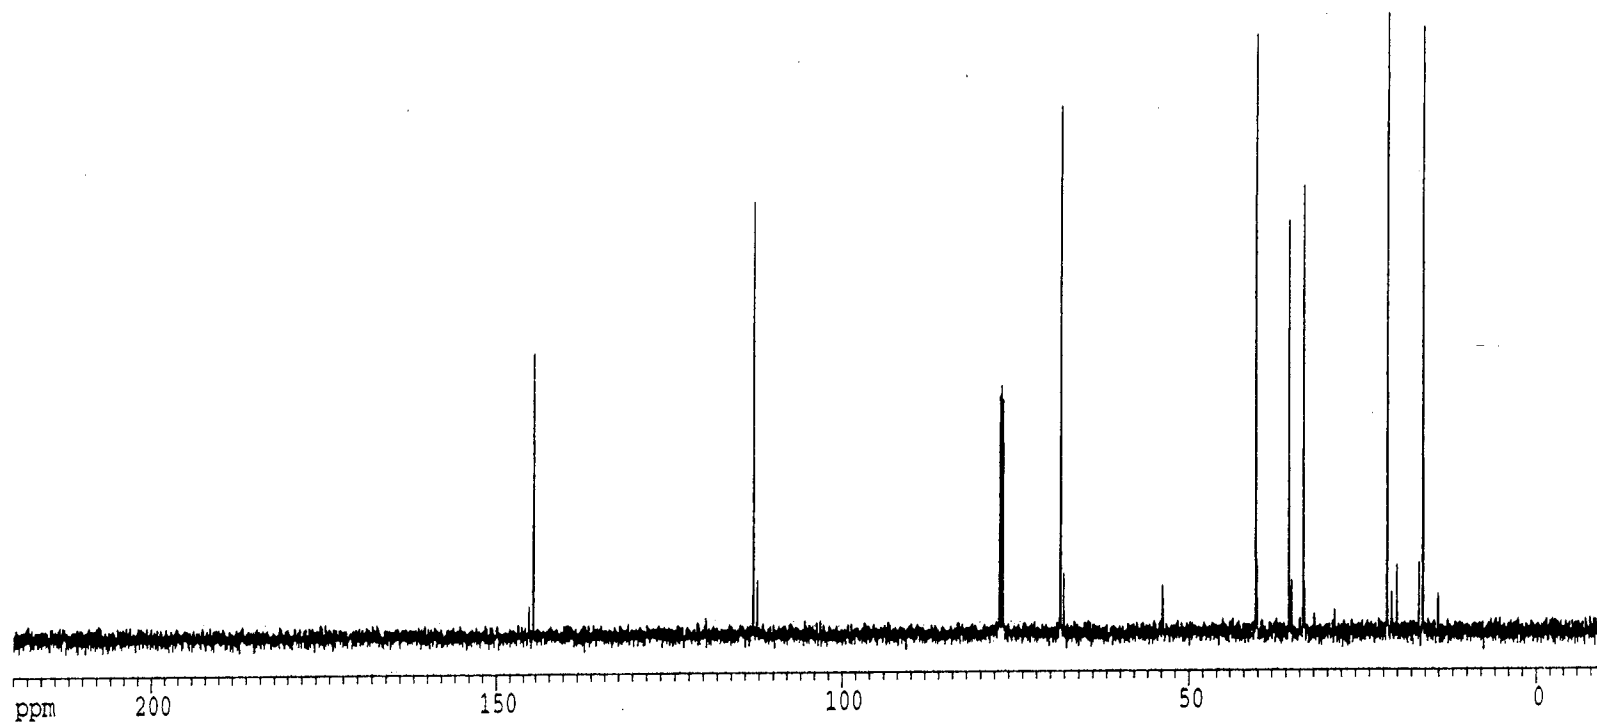

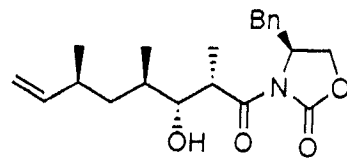

(+)-16

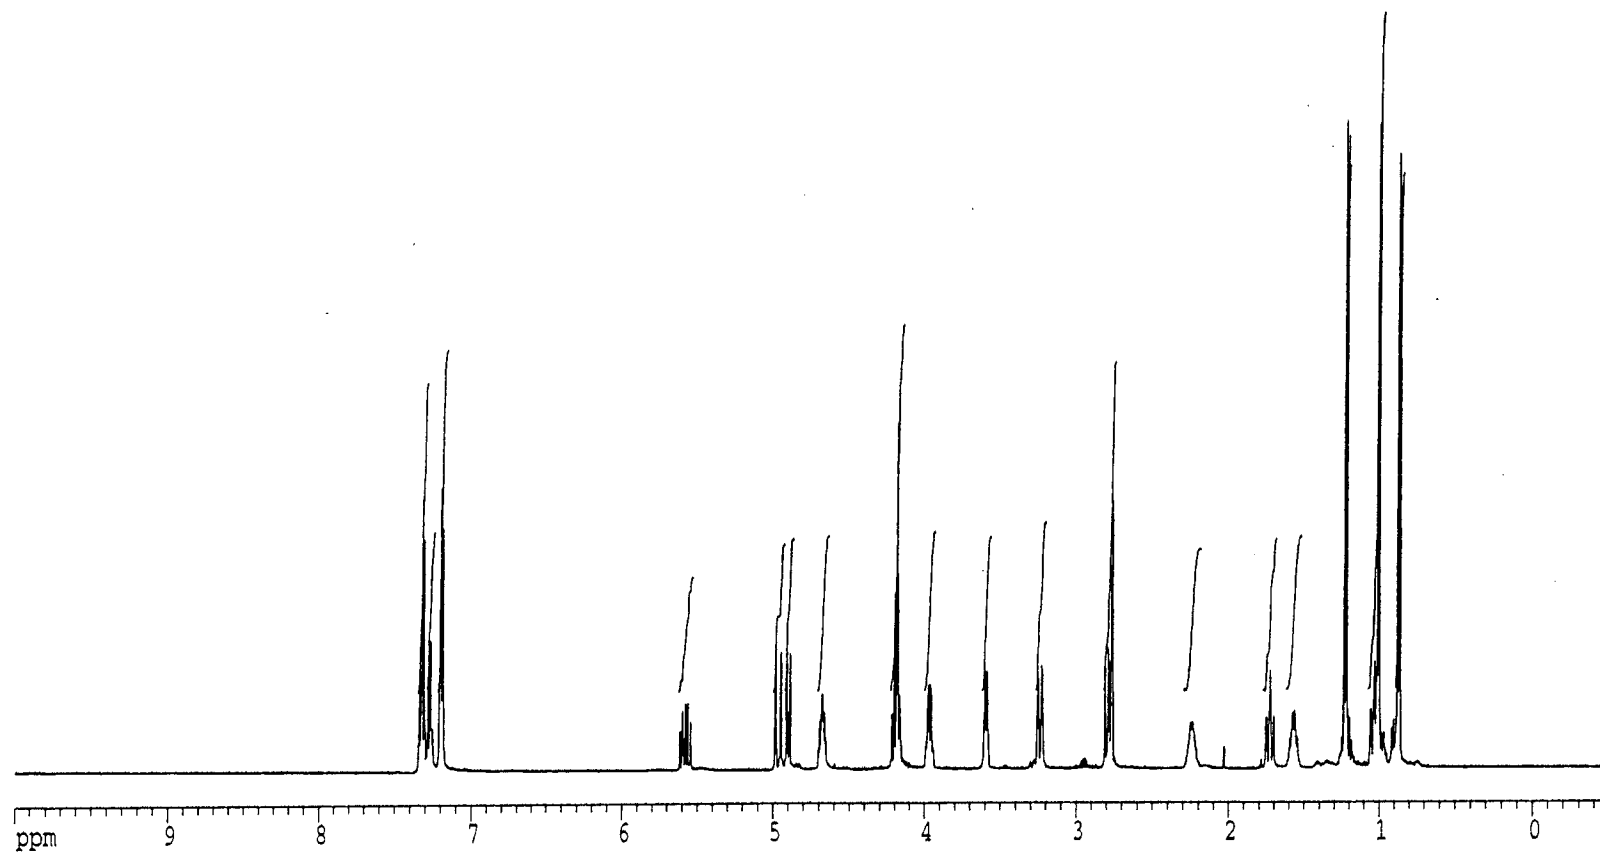

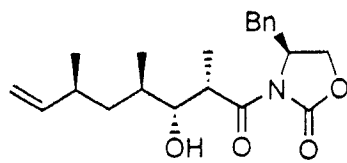

(+)-16

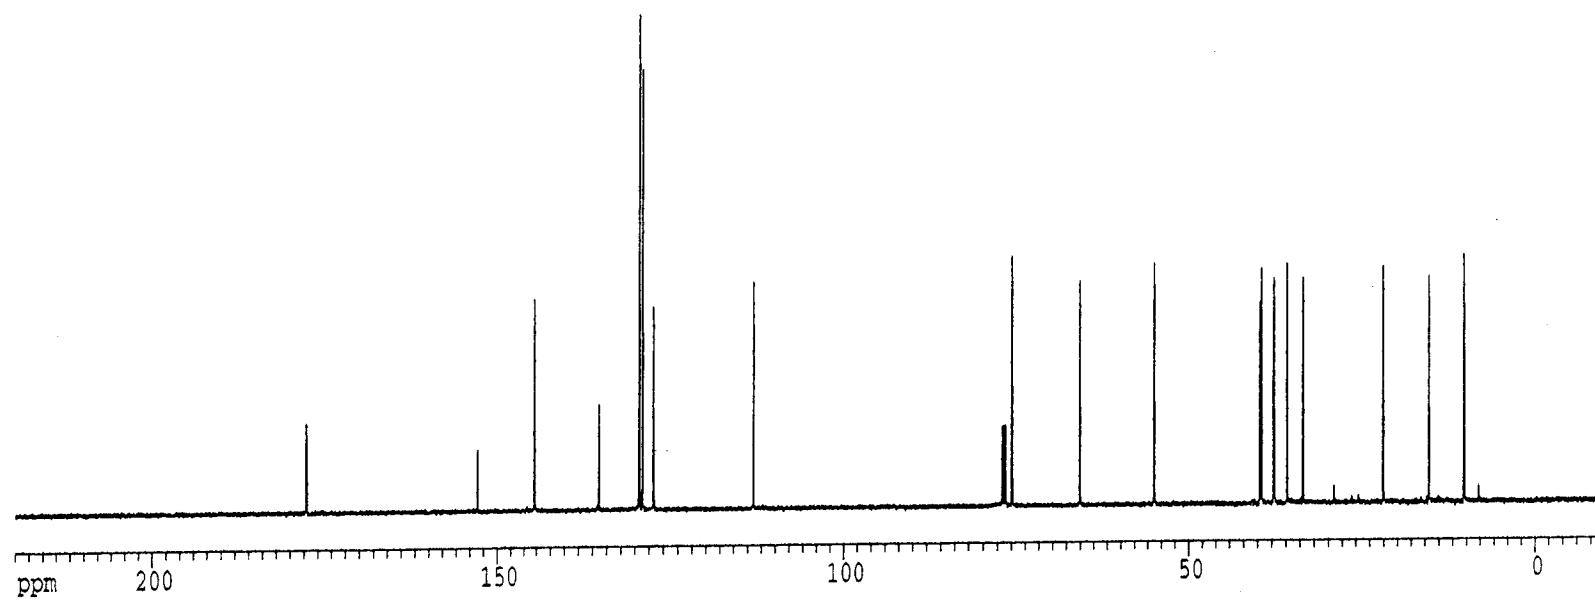

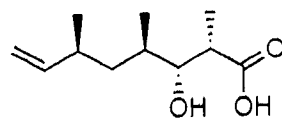

(+)-7

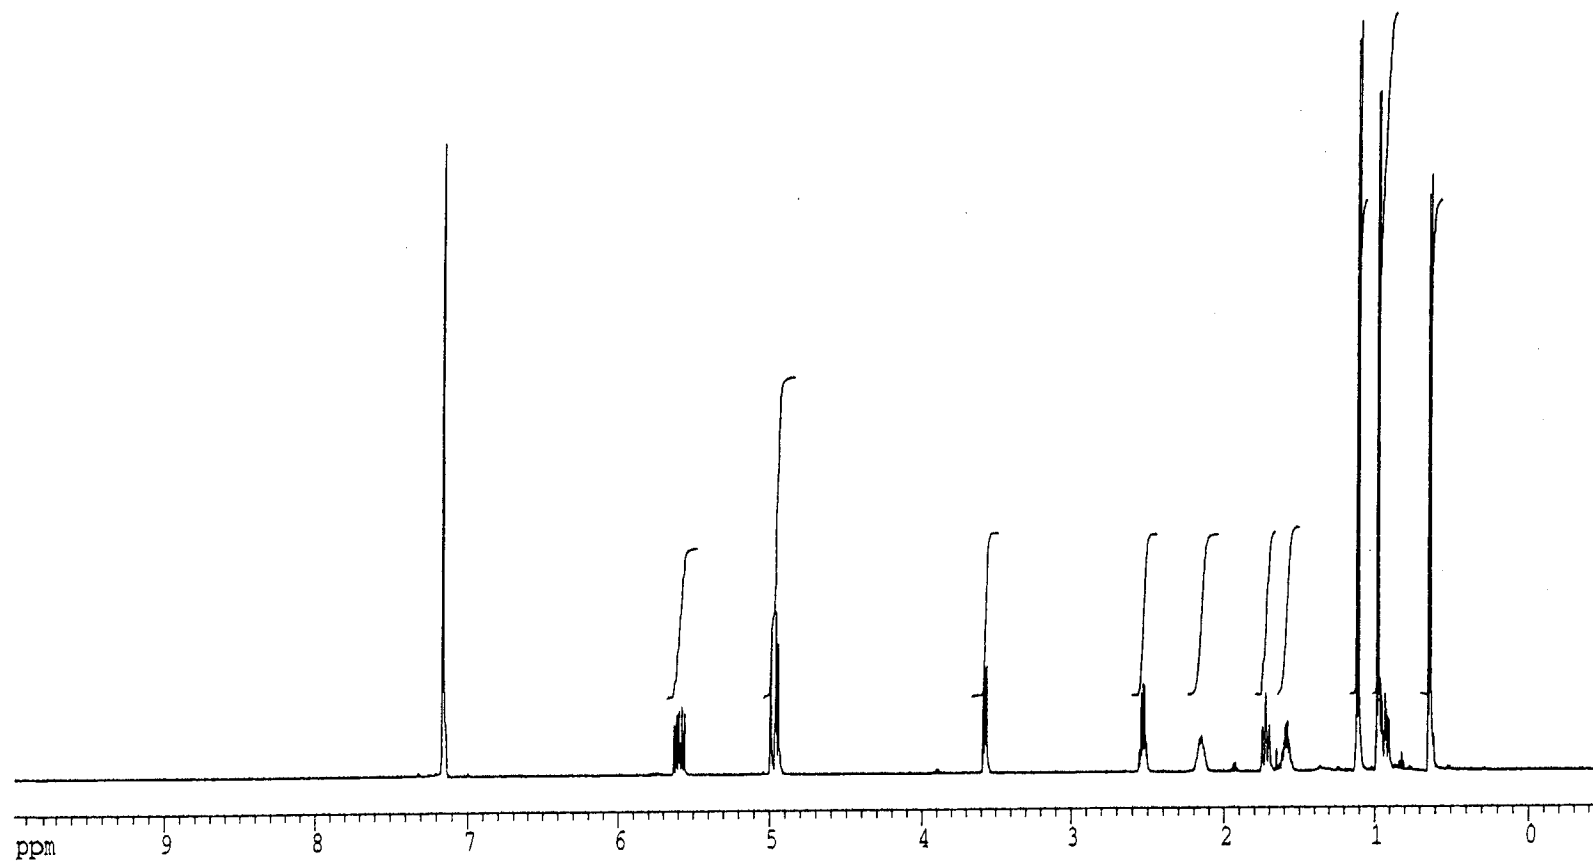

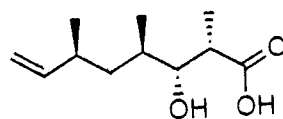

(+)-7

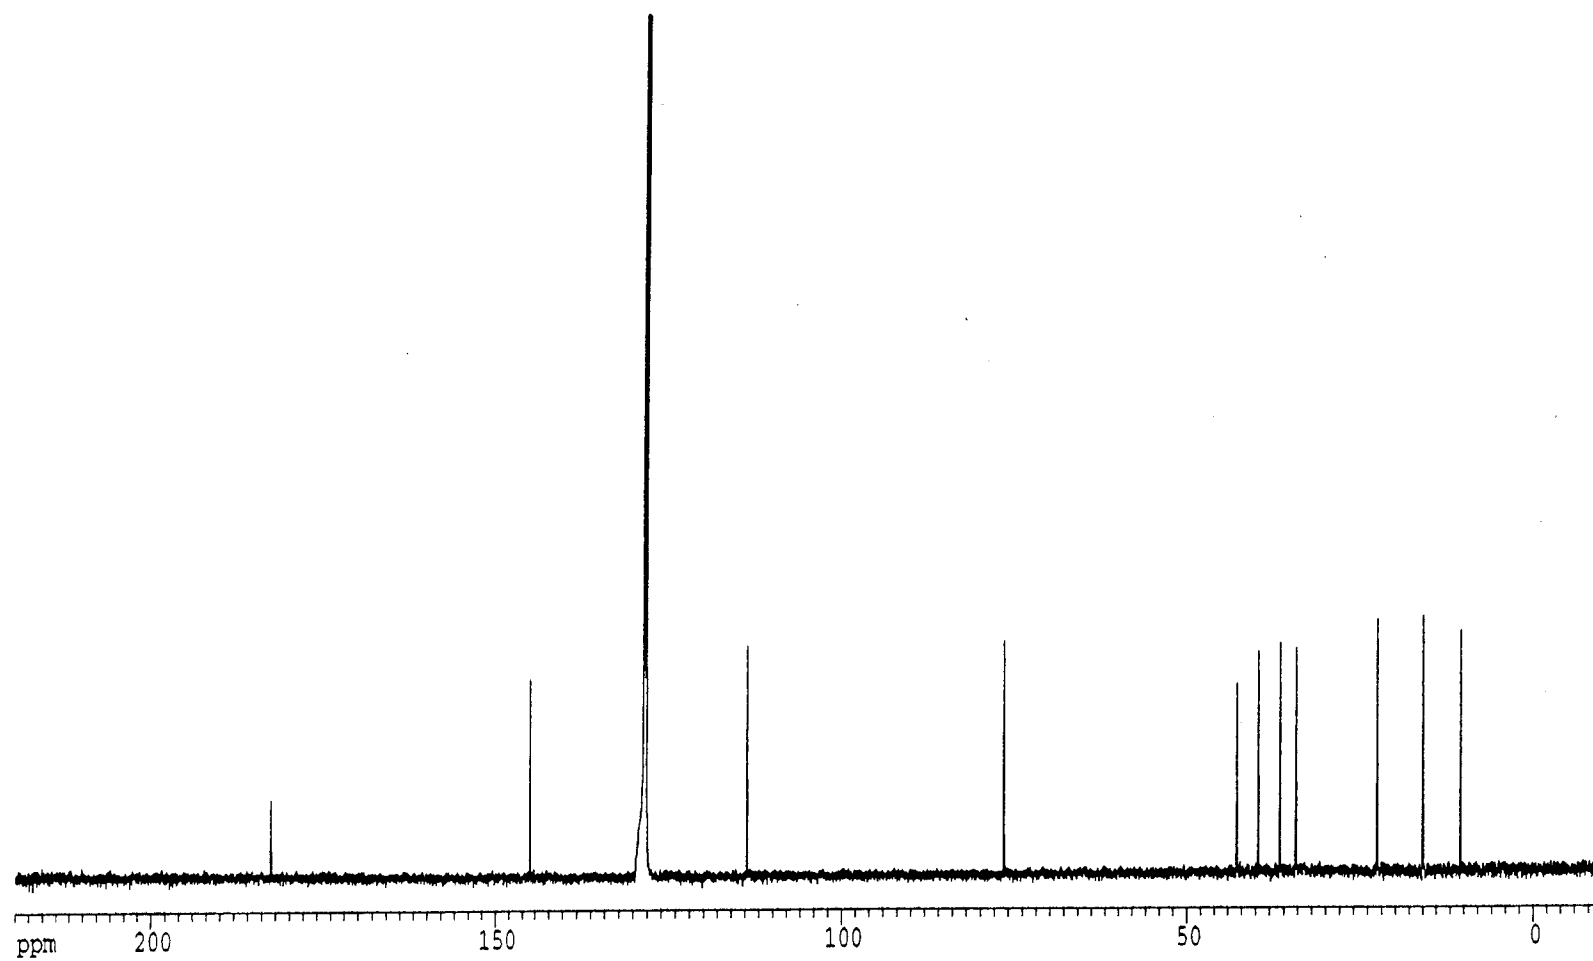

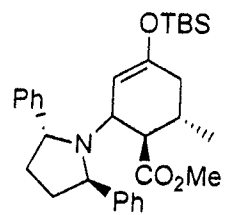

(+)-S4

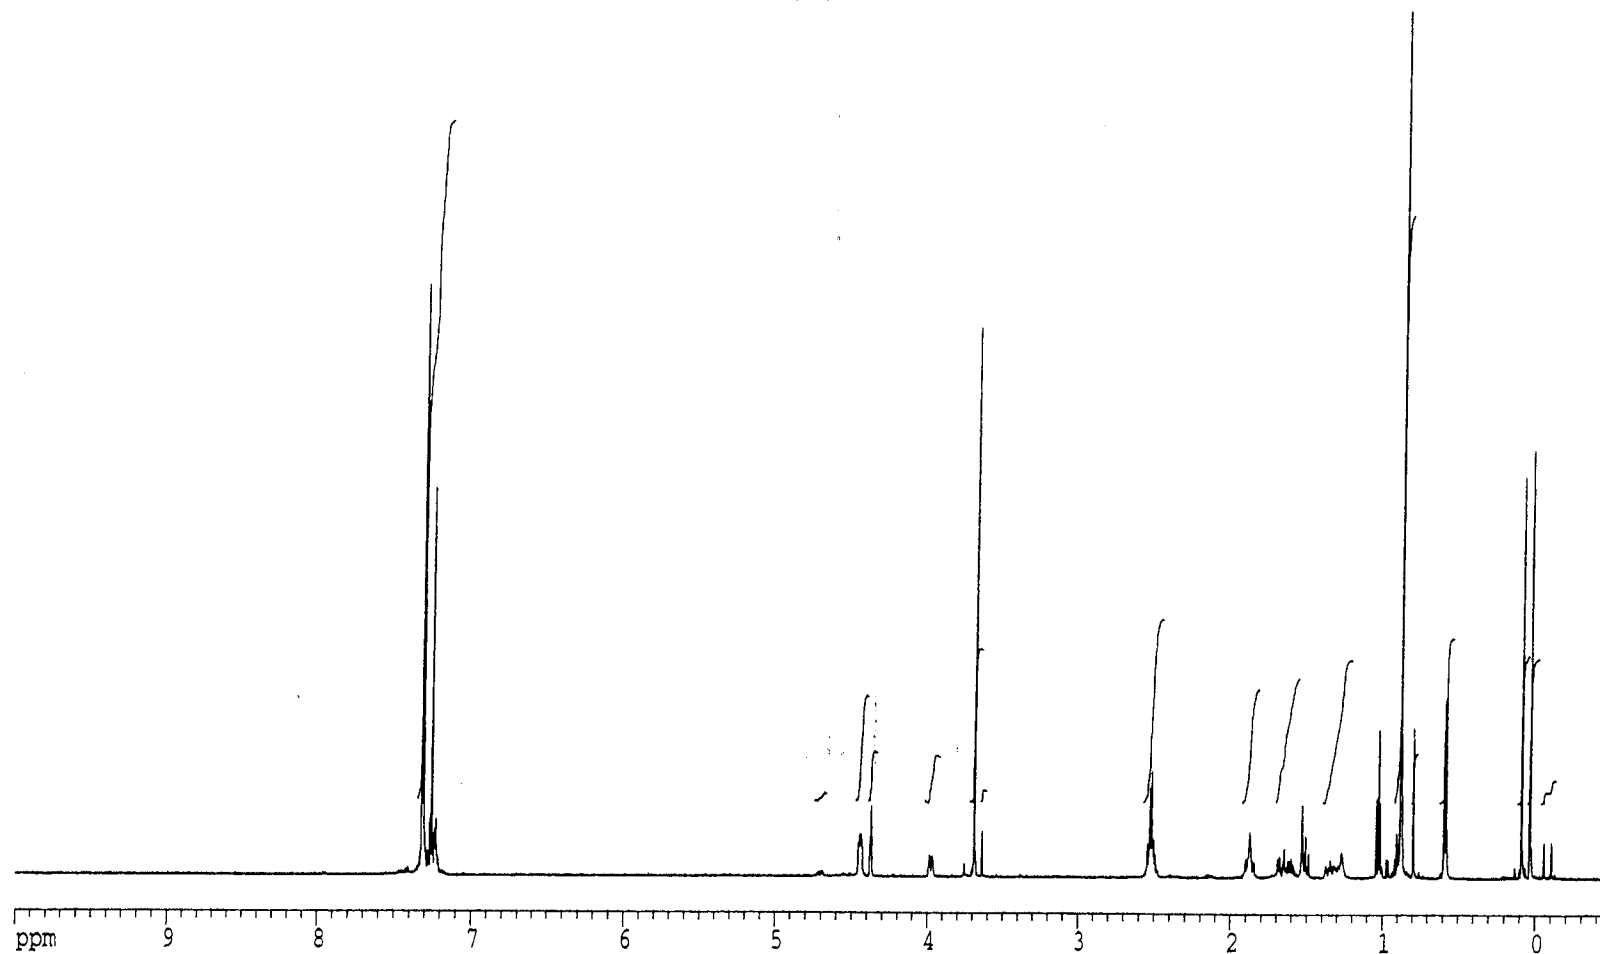

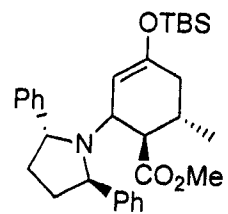

(+)-S4

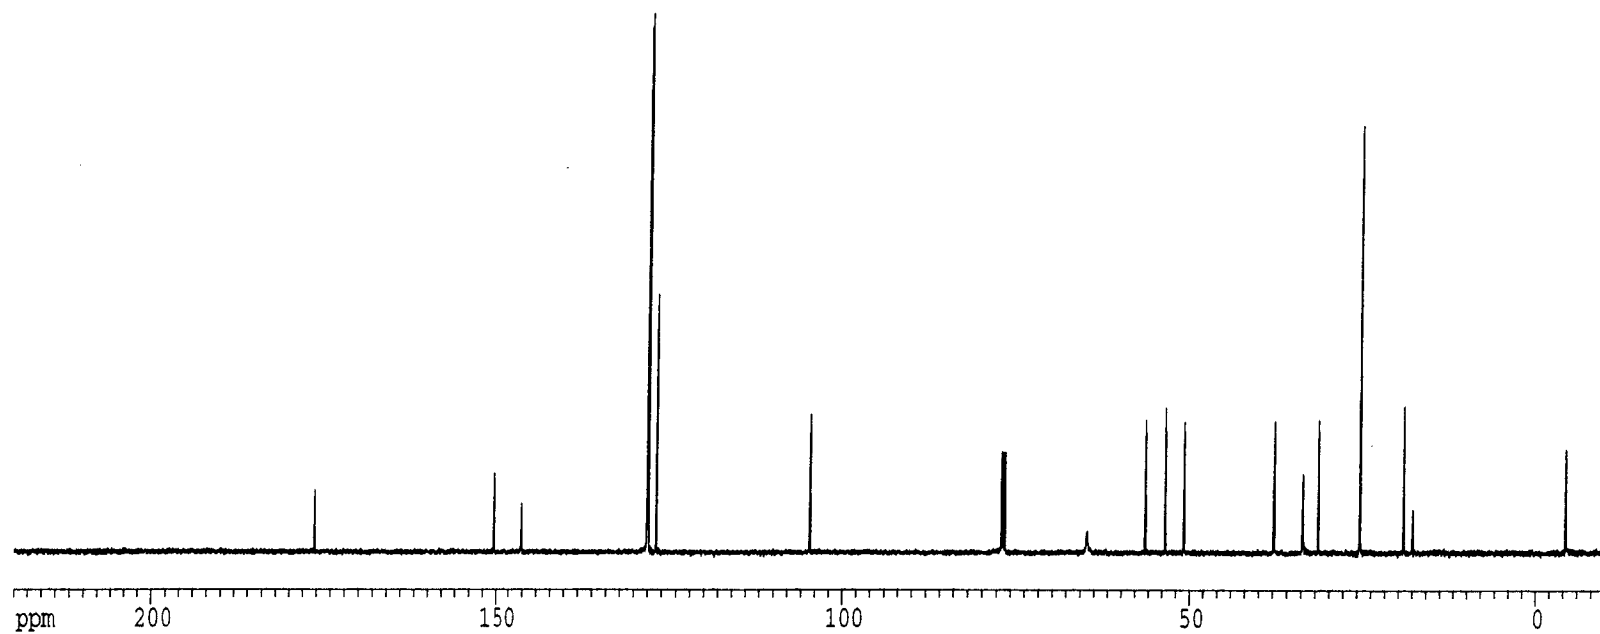

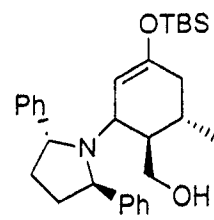

(+)-24

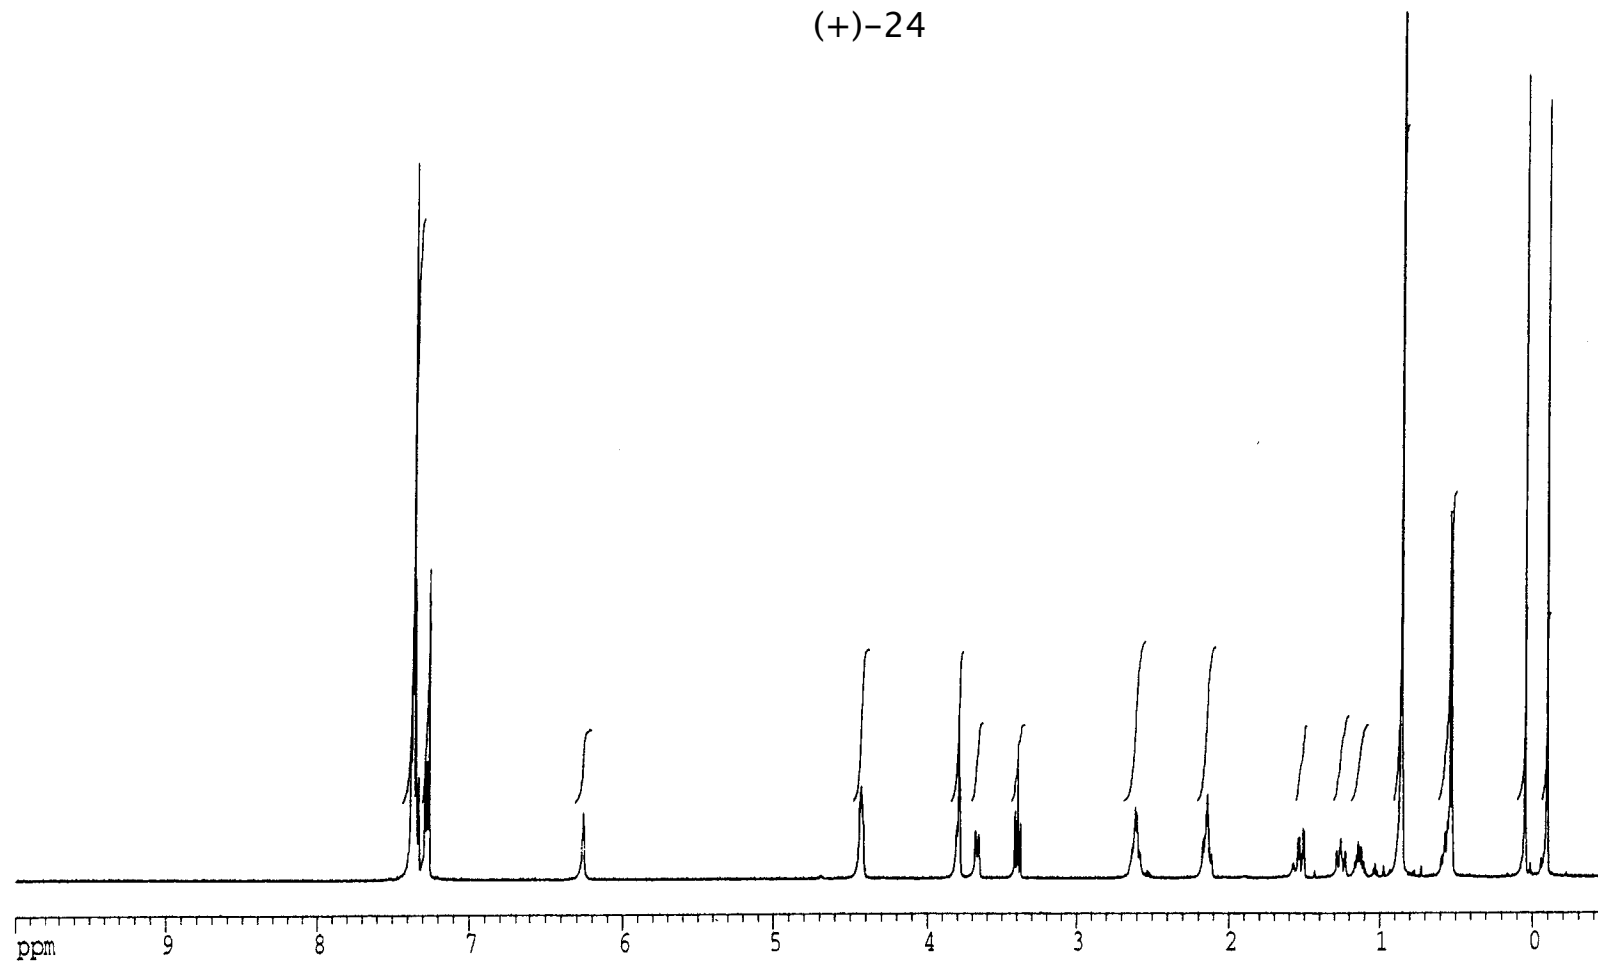

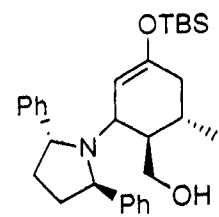

(+)-24

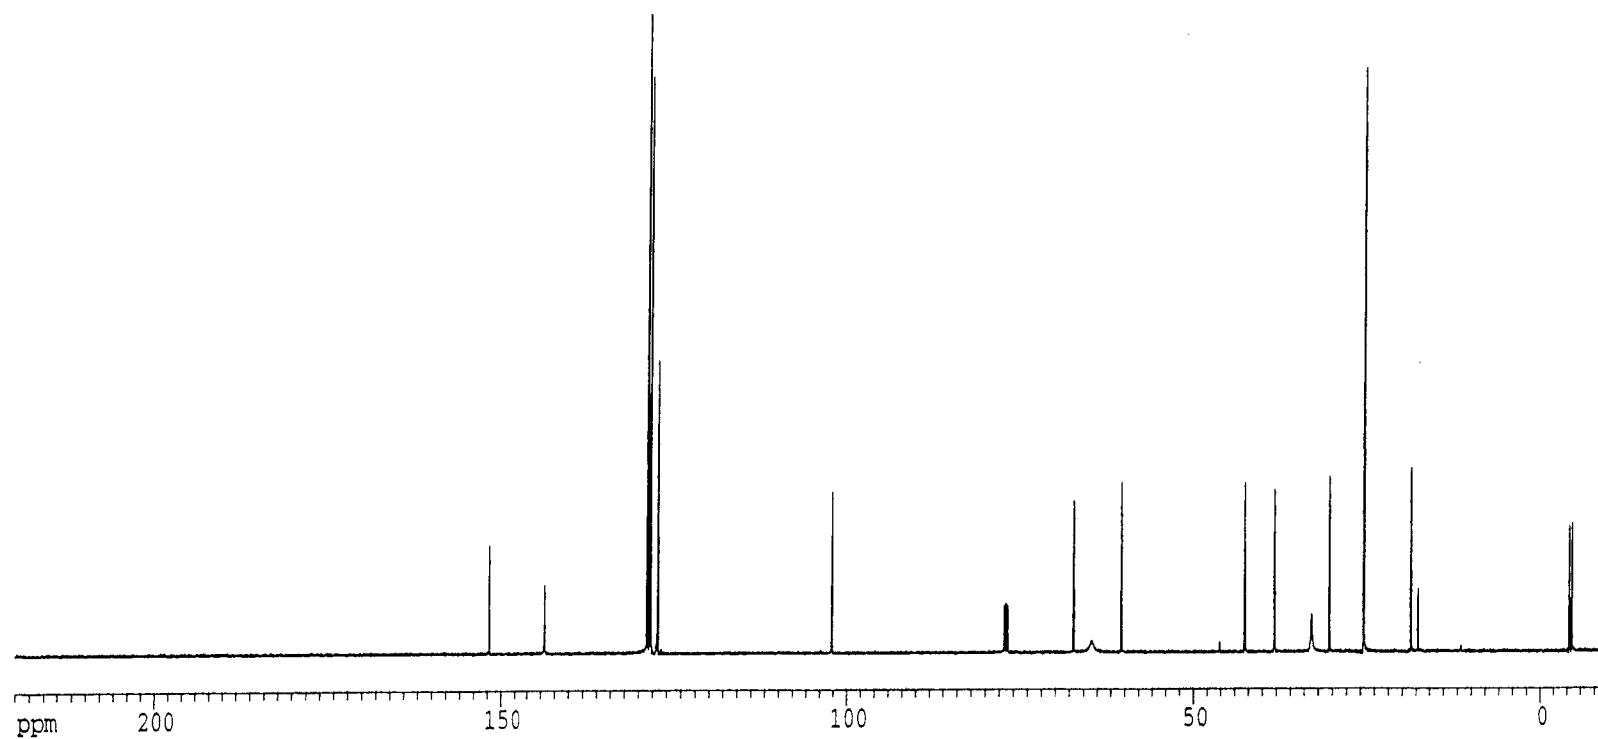

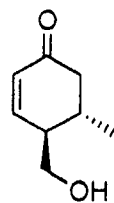

(+)-S5

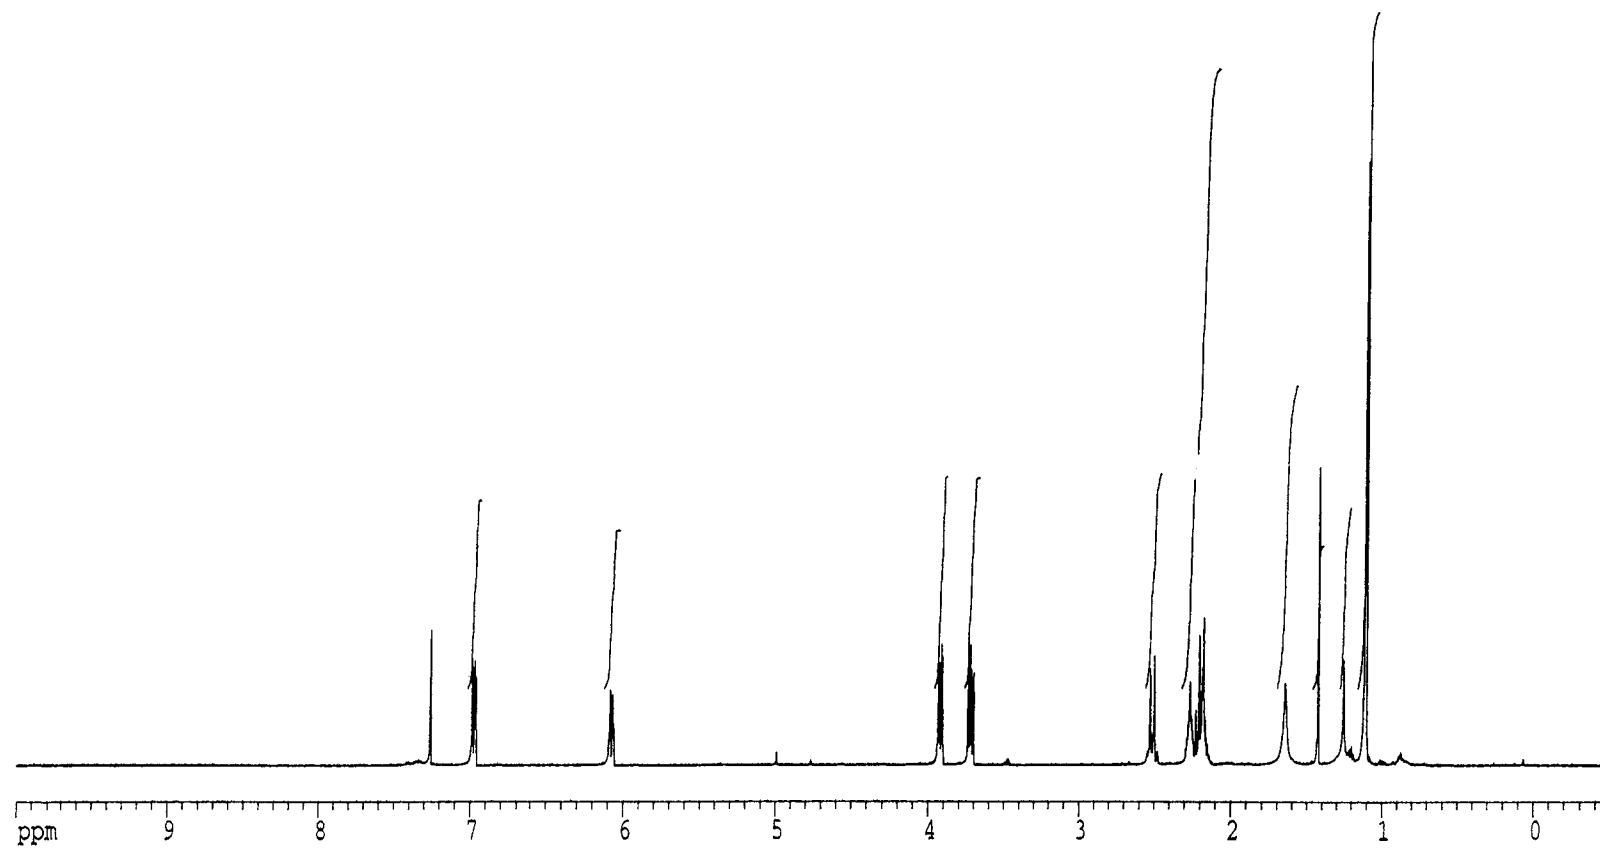

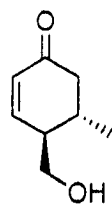

(+)-S5

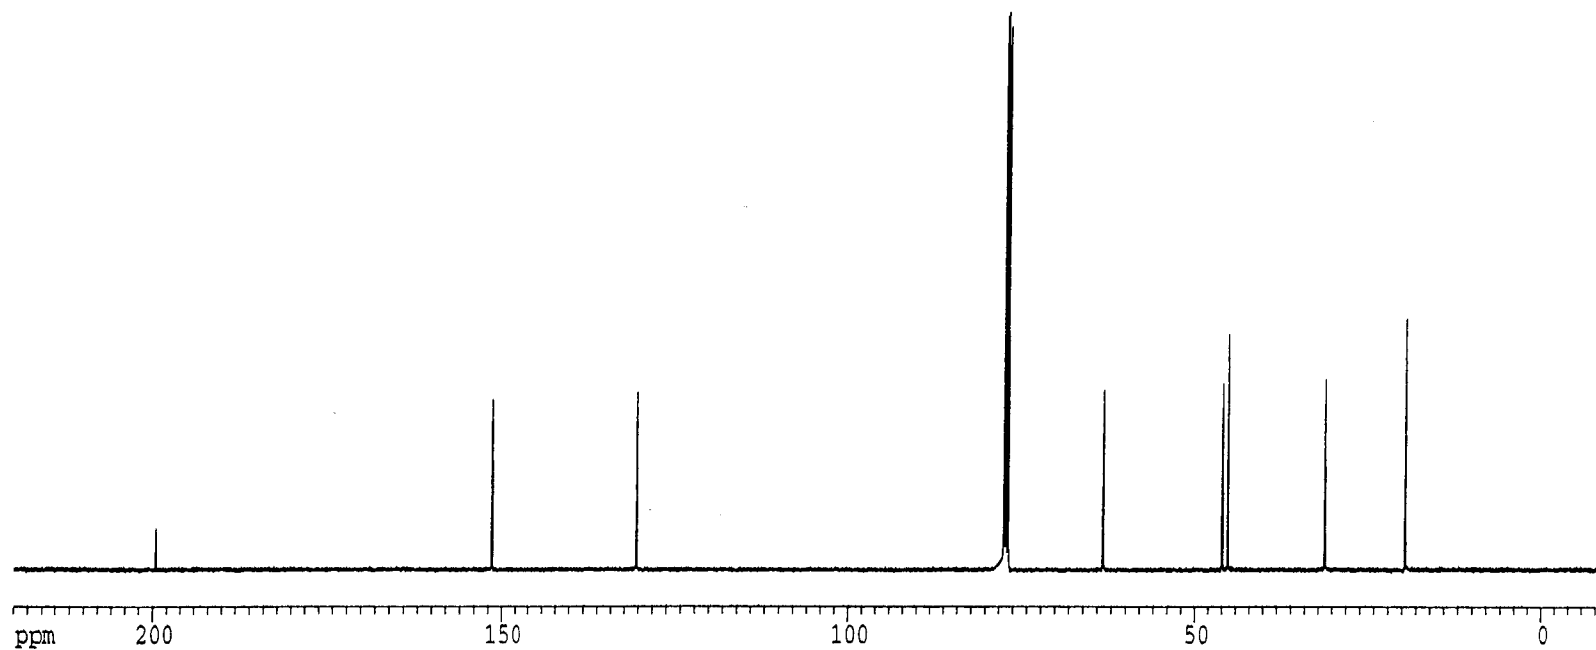

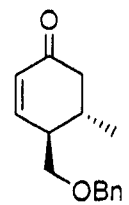

(+)-25

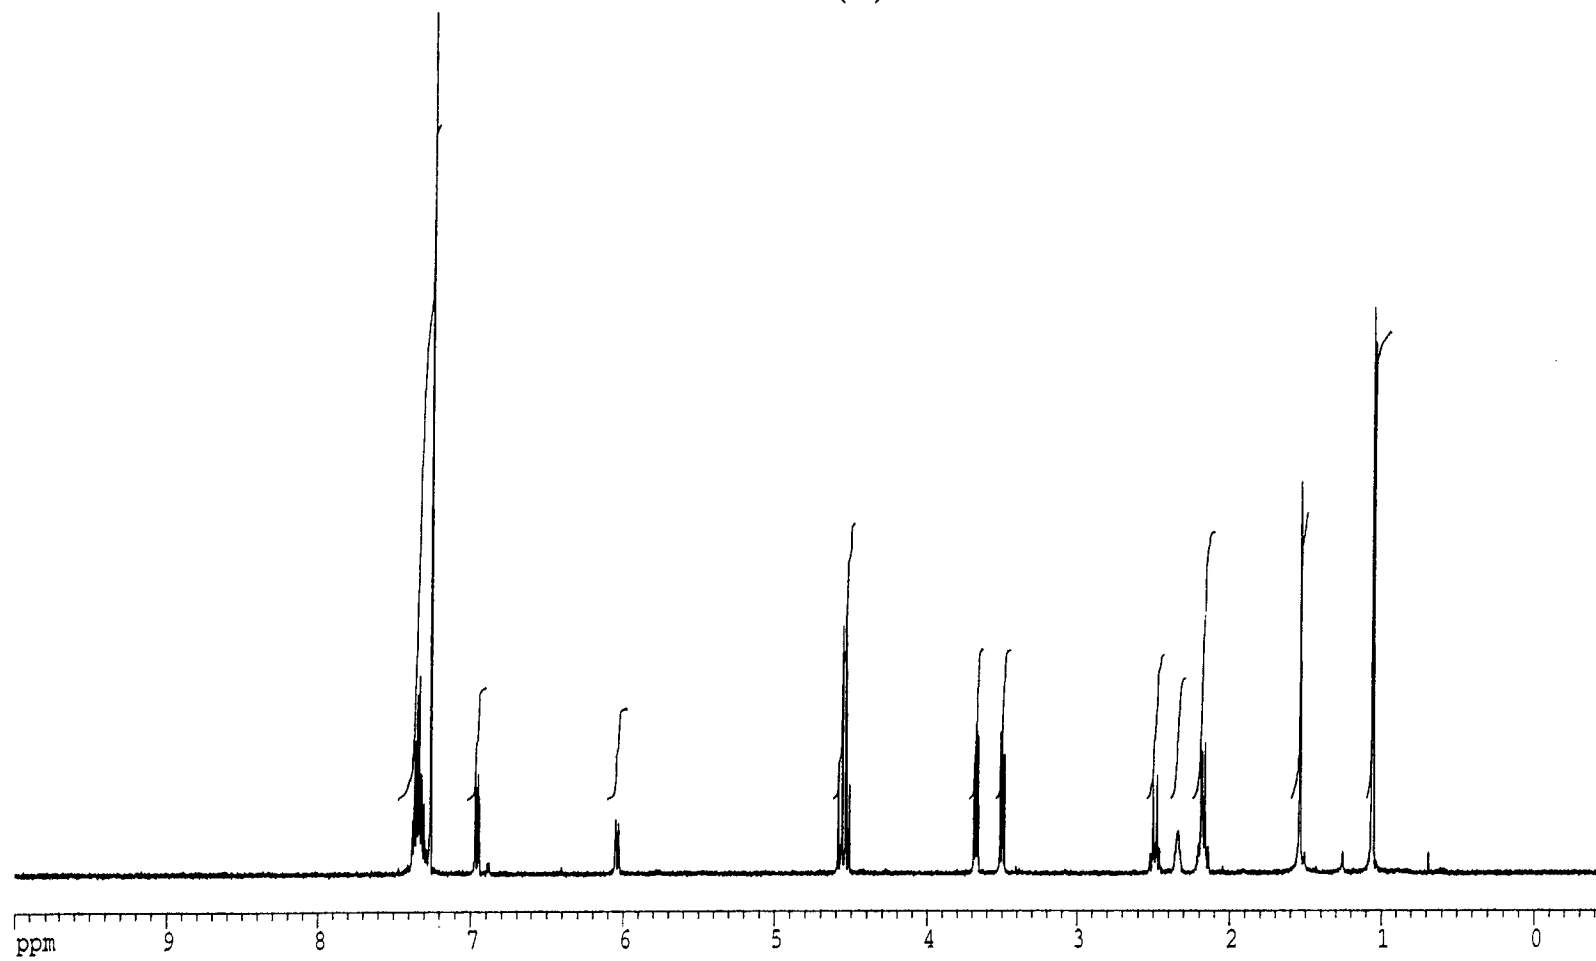

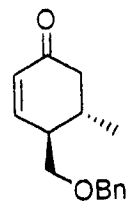

(+)-25

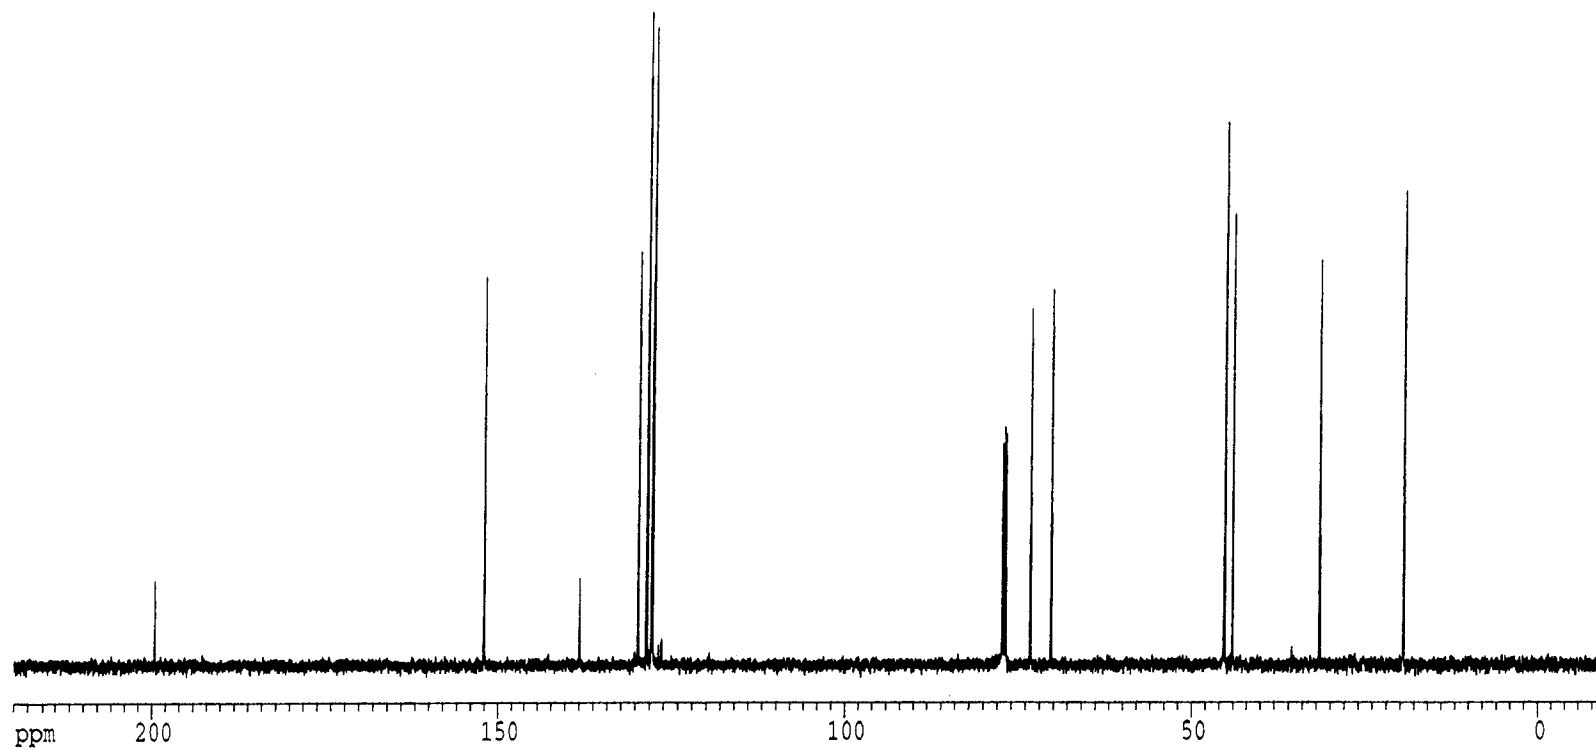

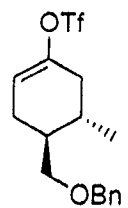

(-)-26

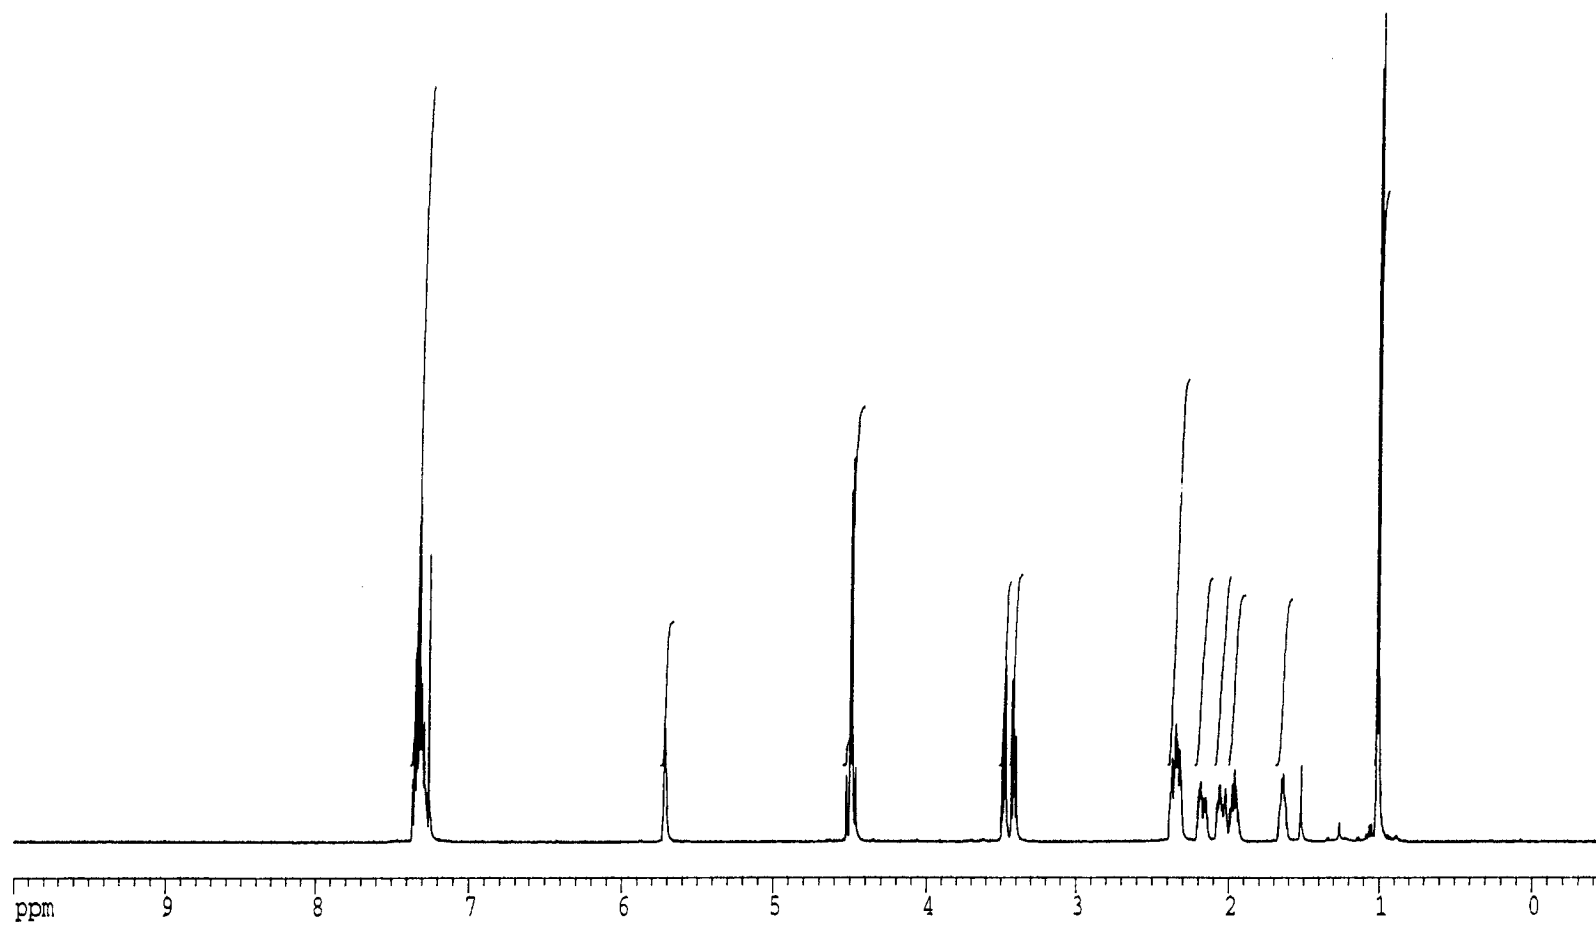

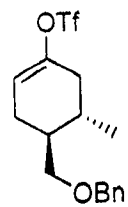

(-)-26

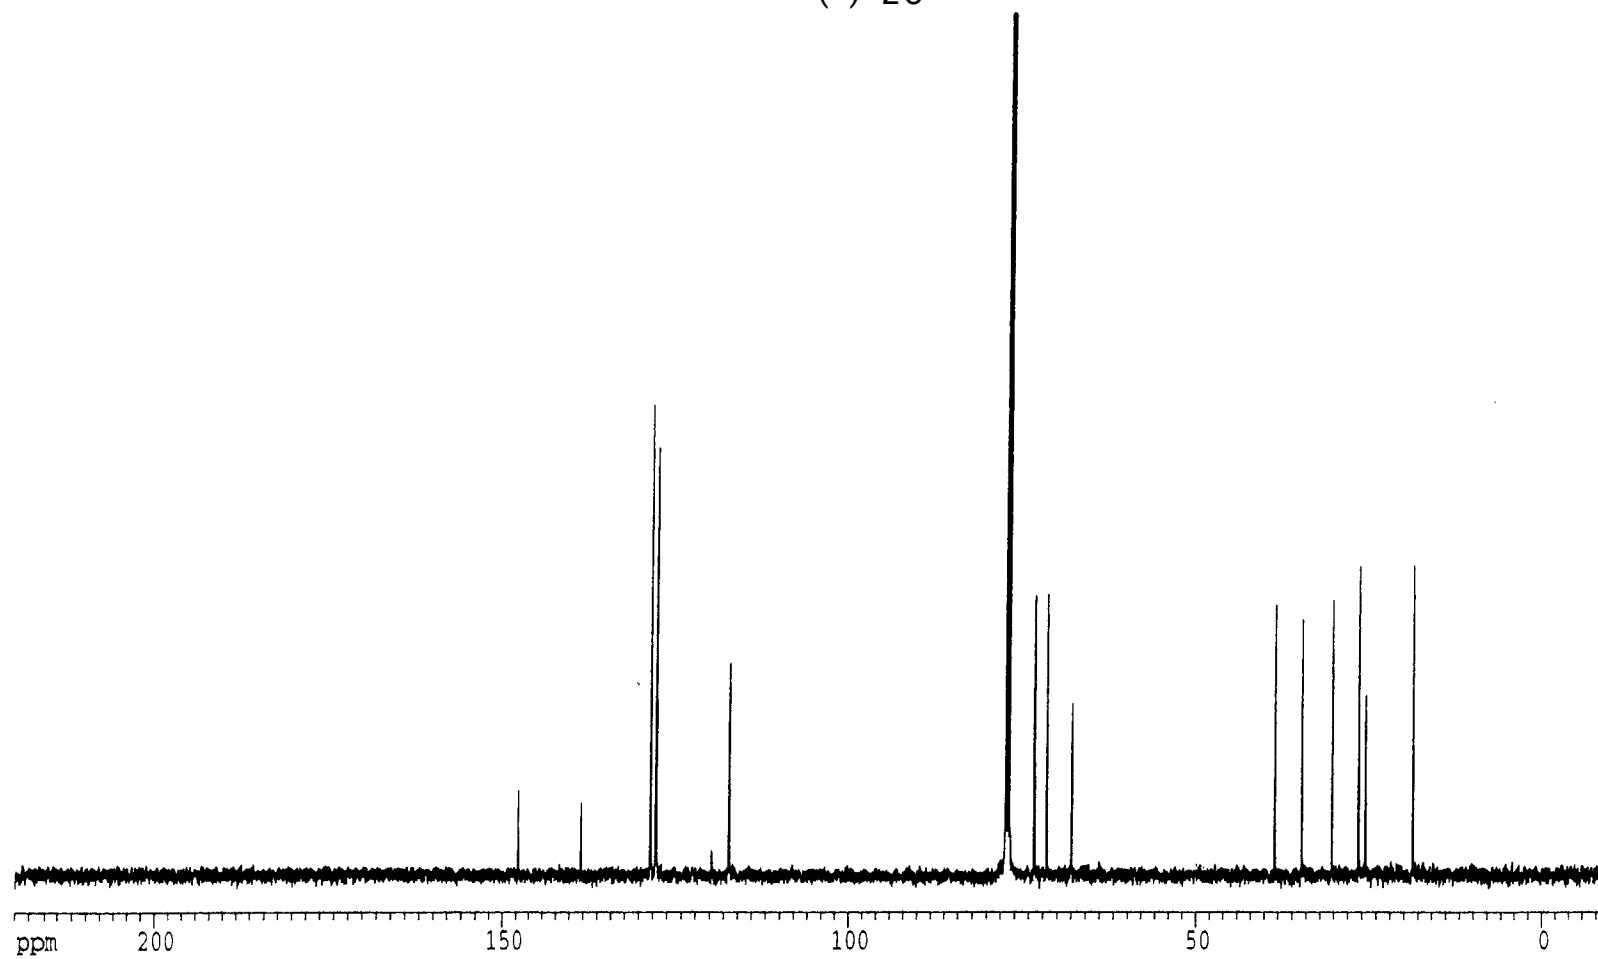

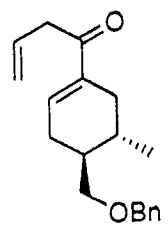

(+)-S6

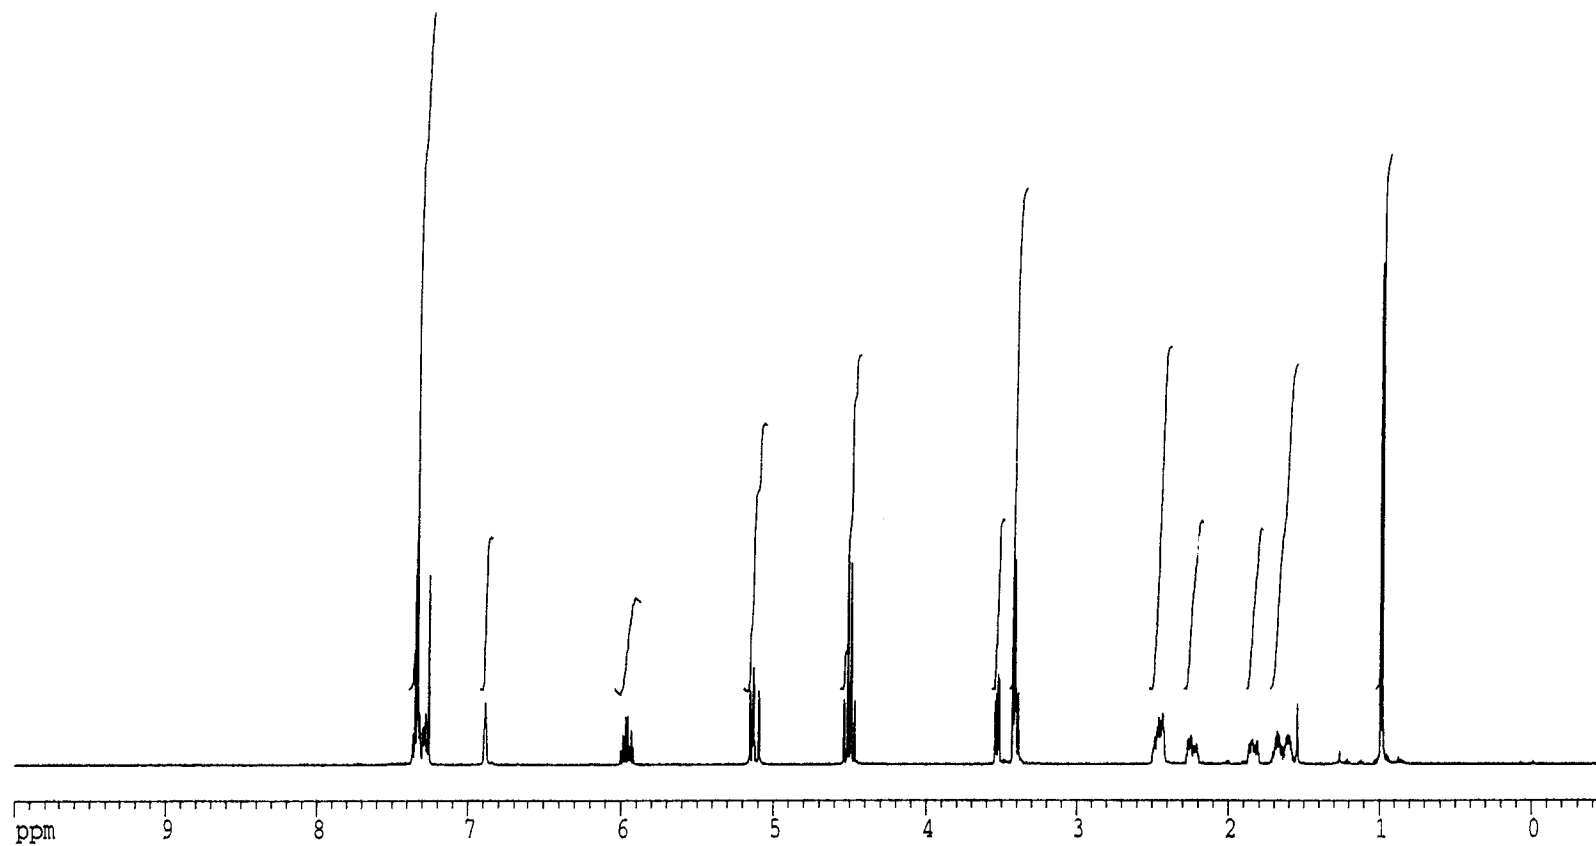

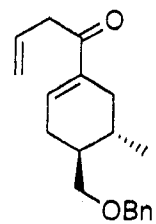

(+)-S6

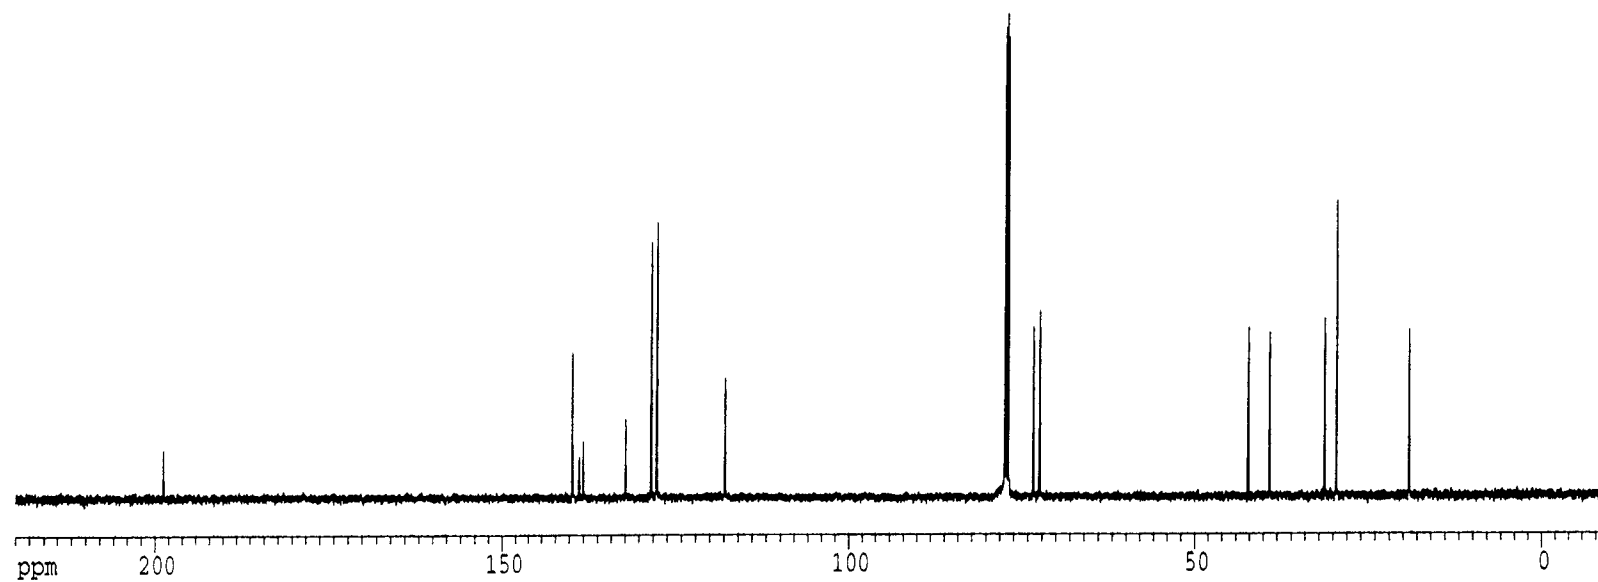

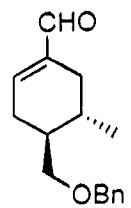

(+)-27

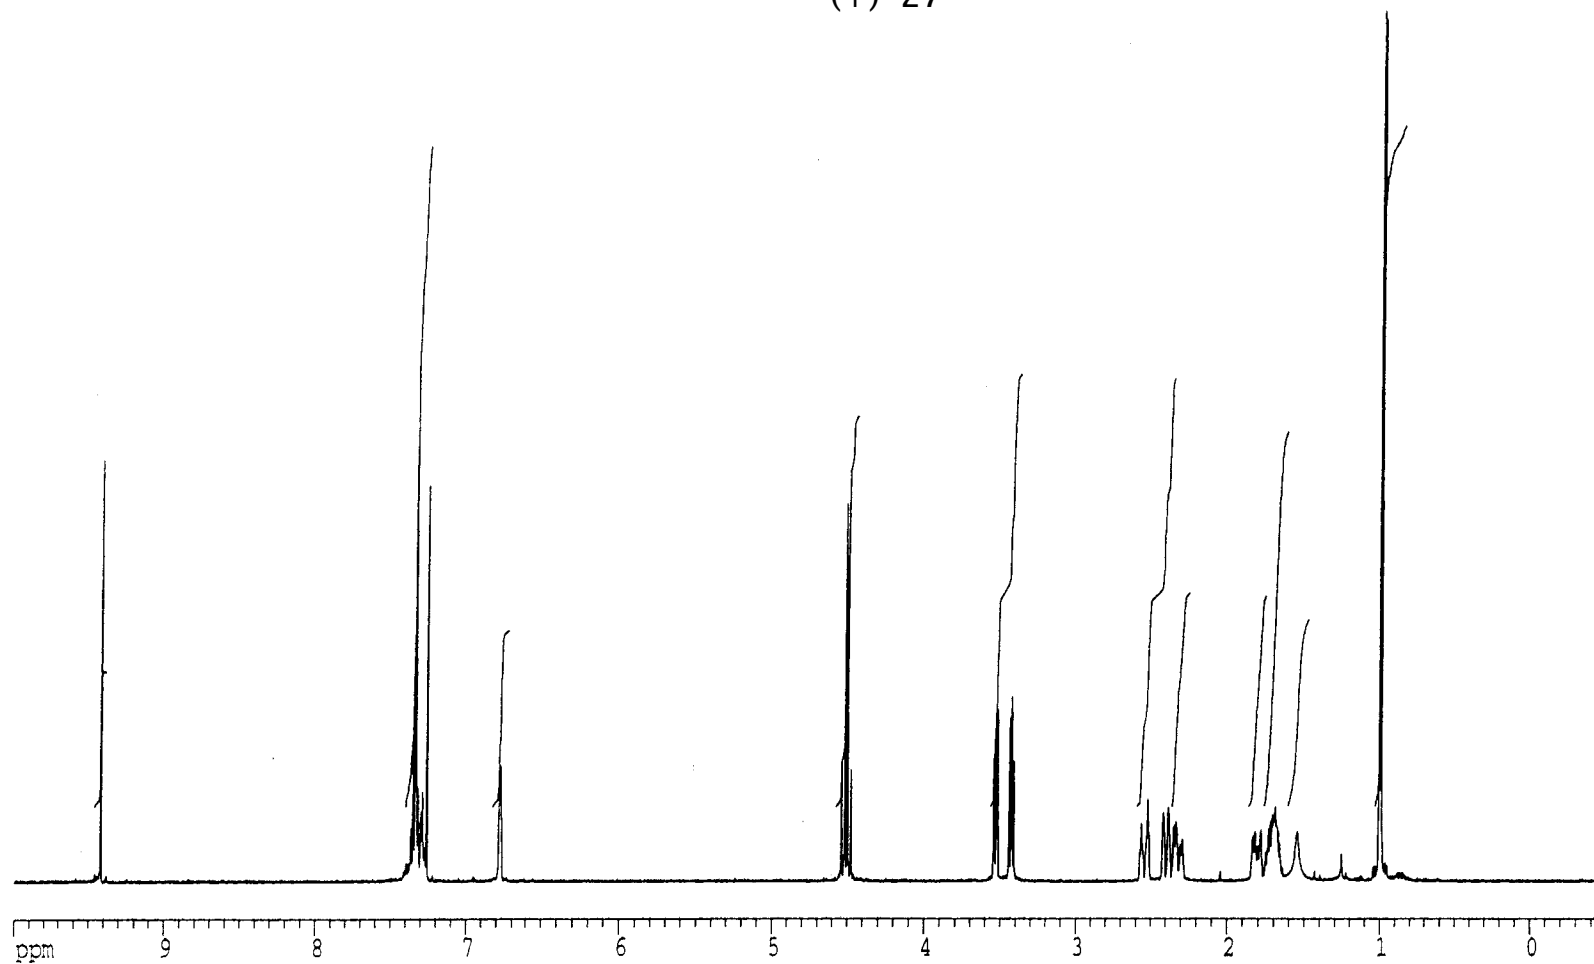

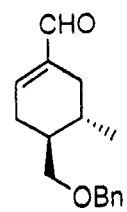

(+)-27

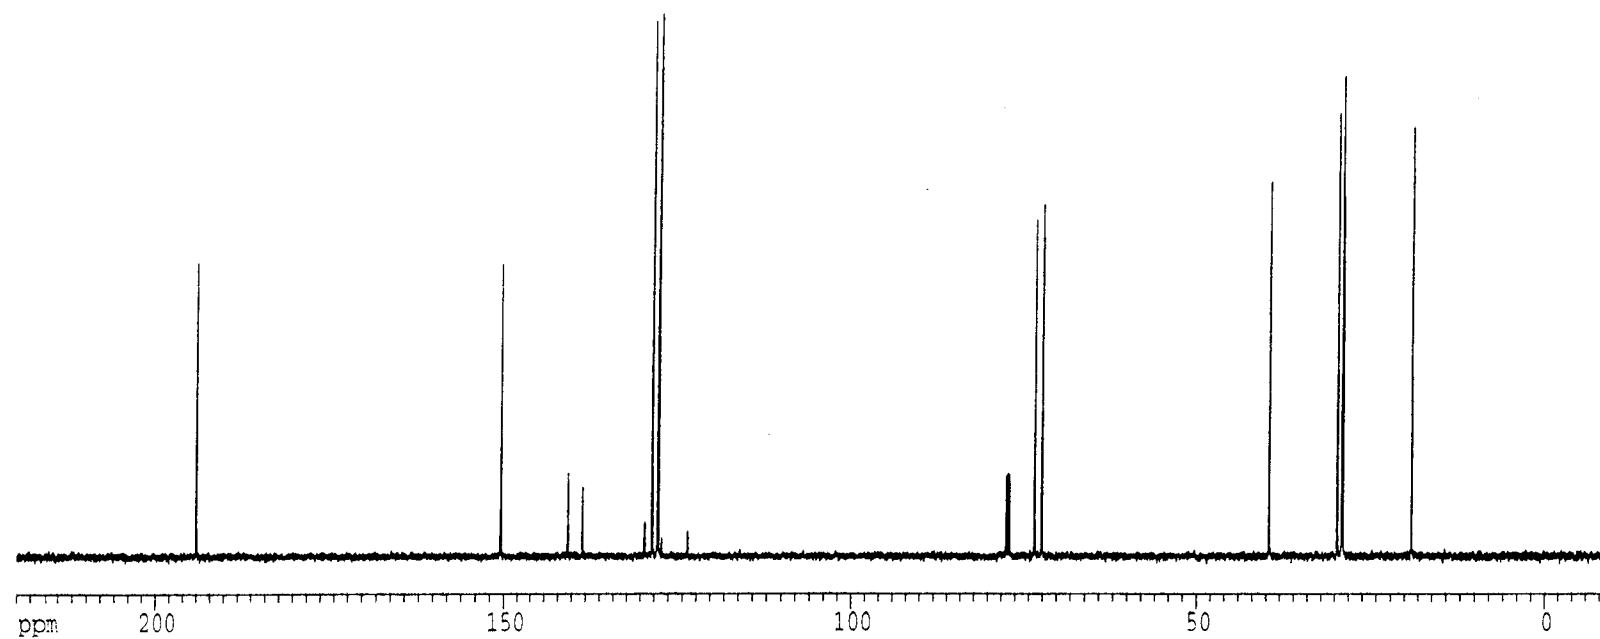

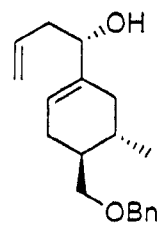

(+)-17

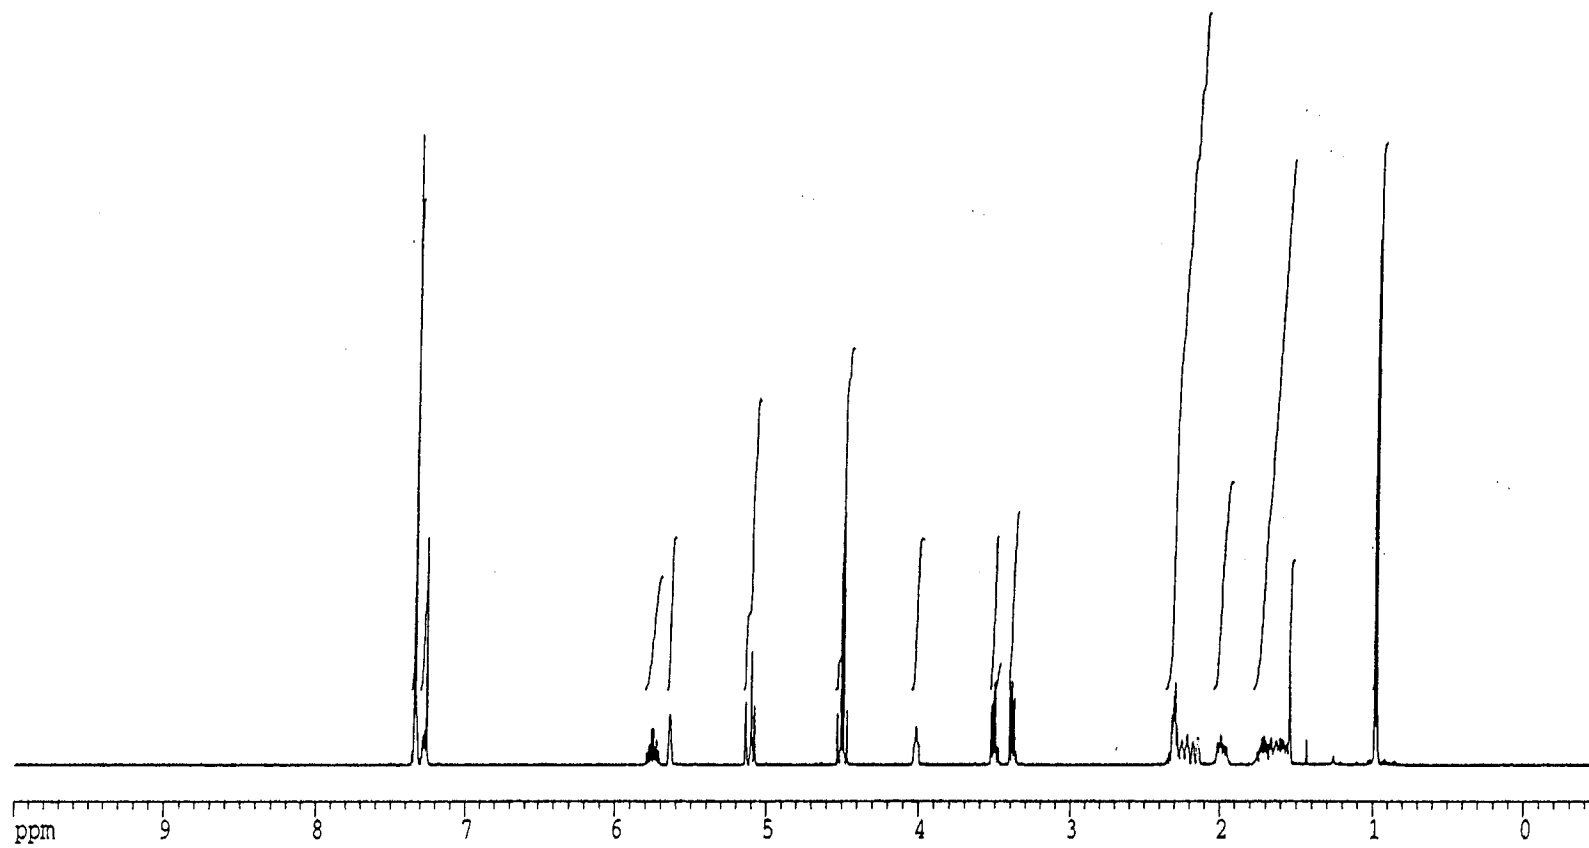

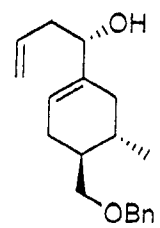

(+)-17

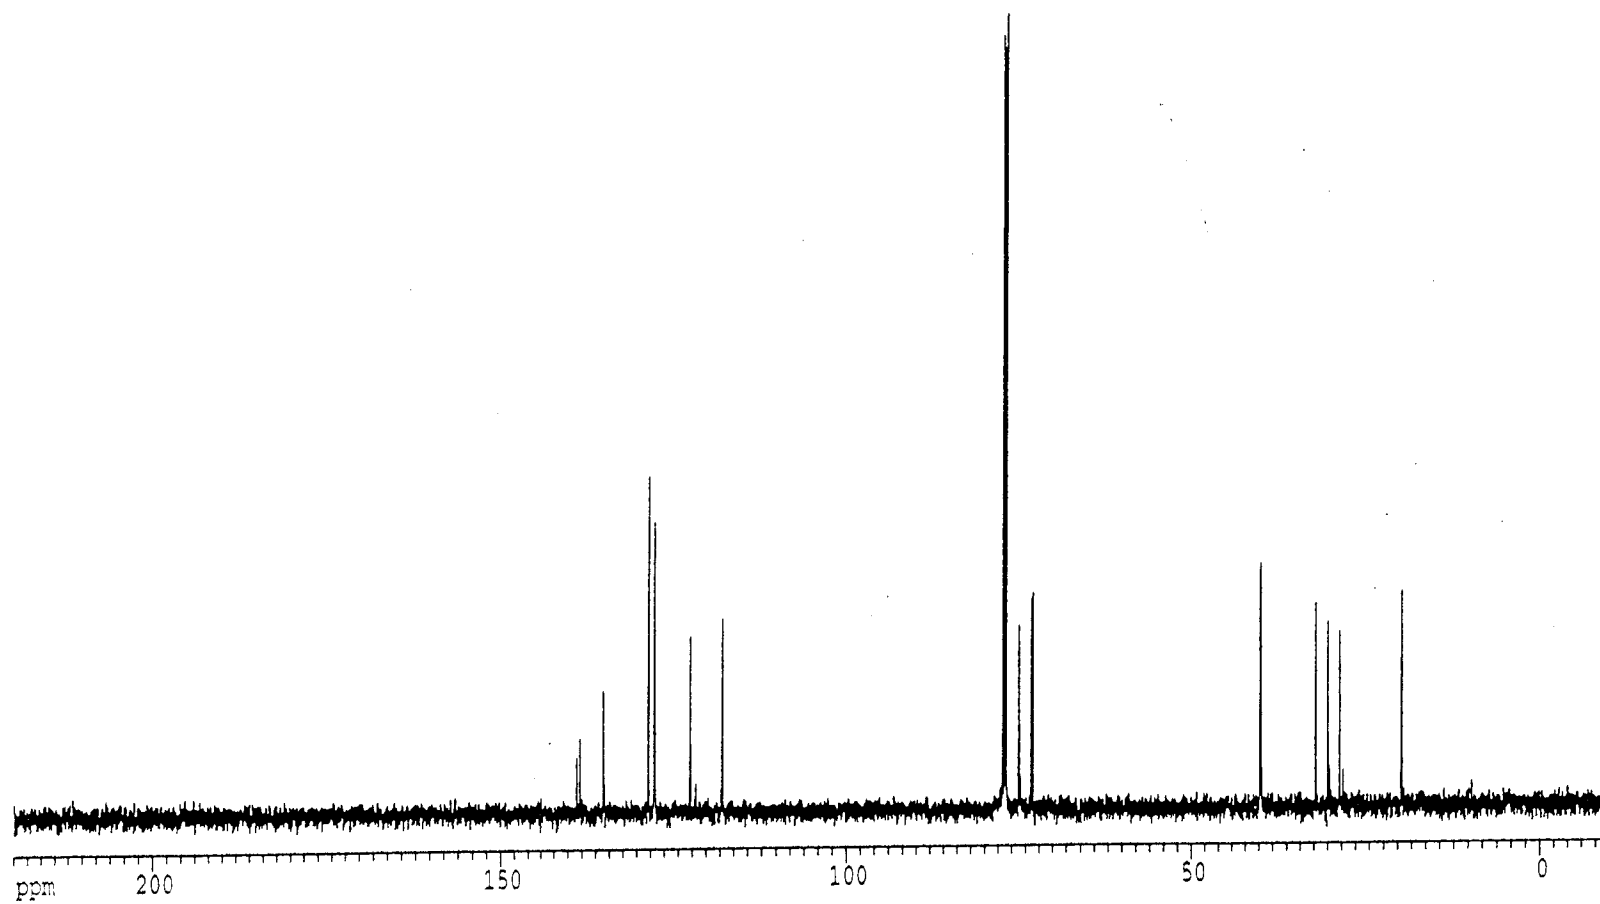

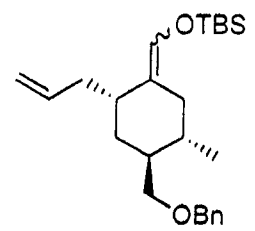

(29)

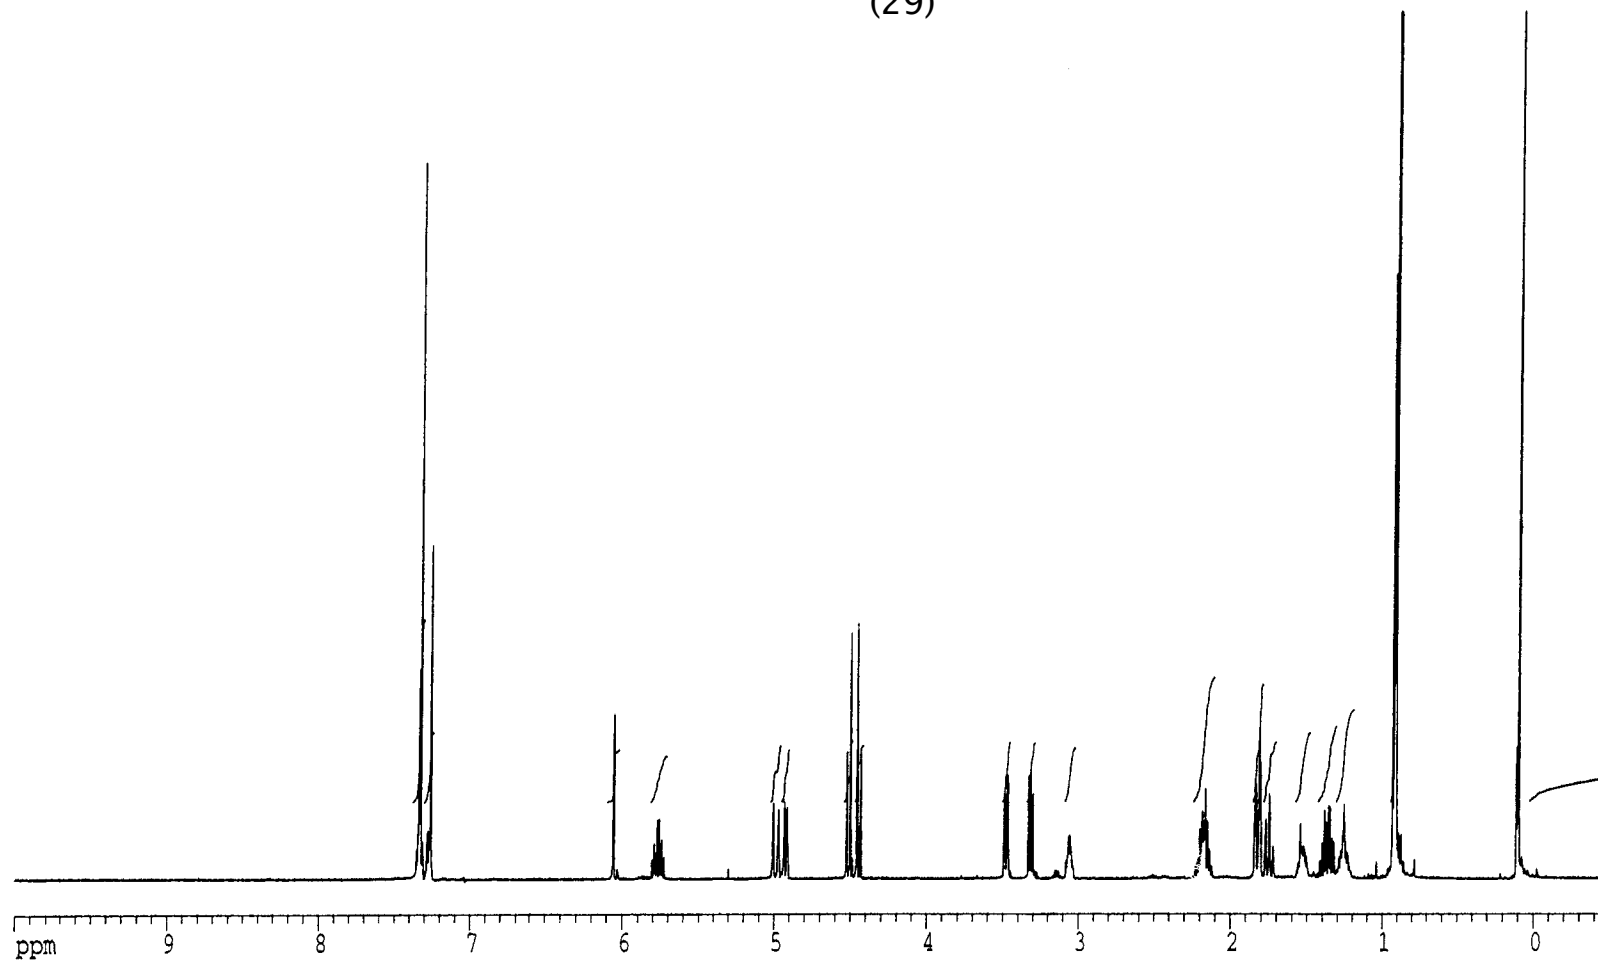

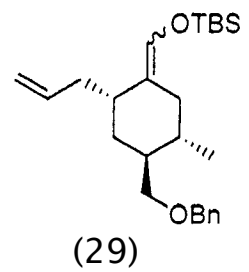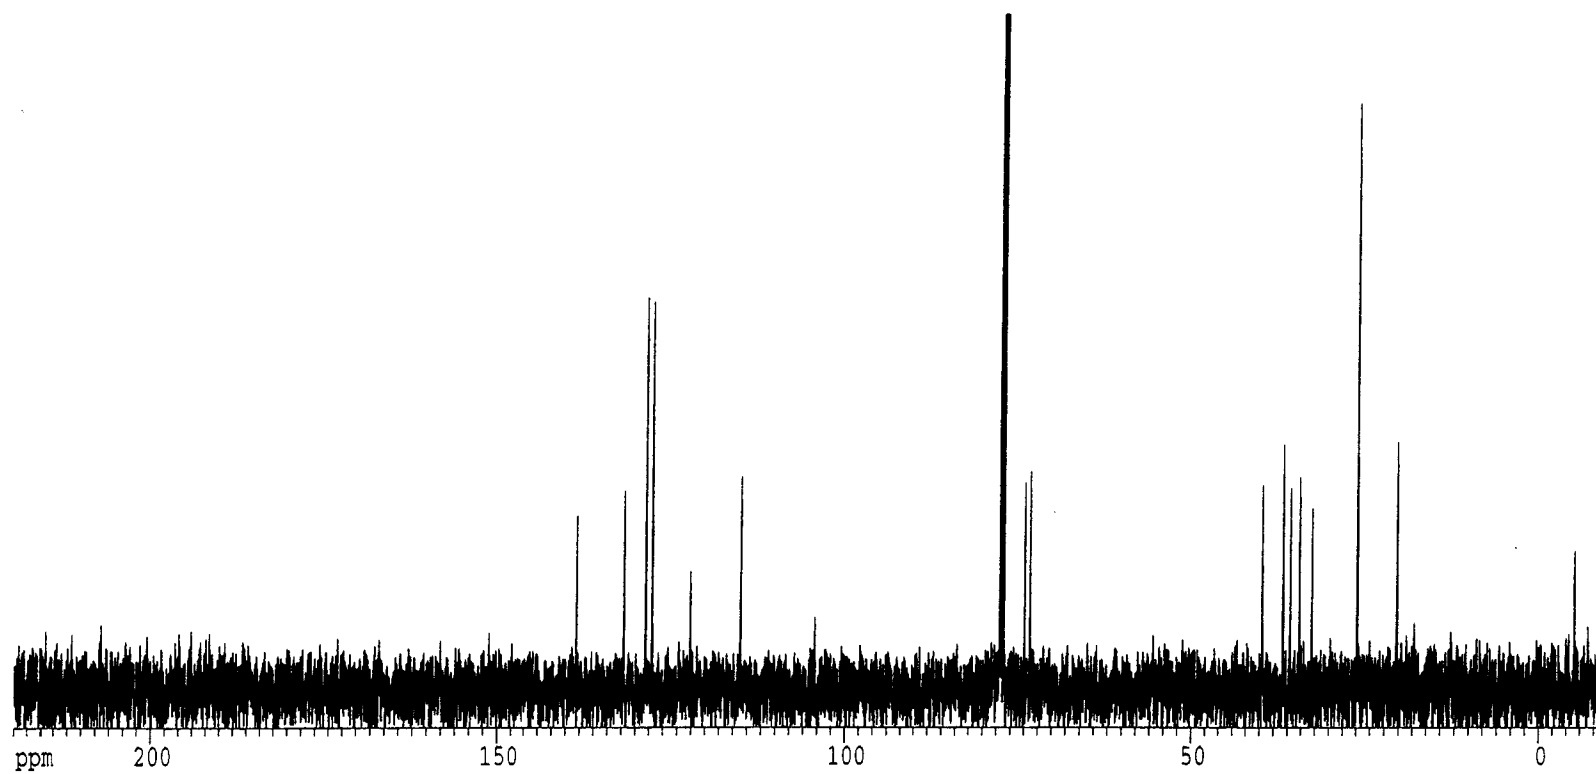

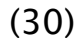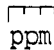

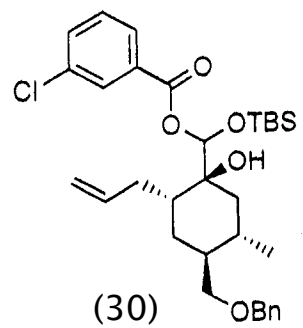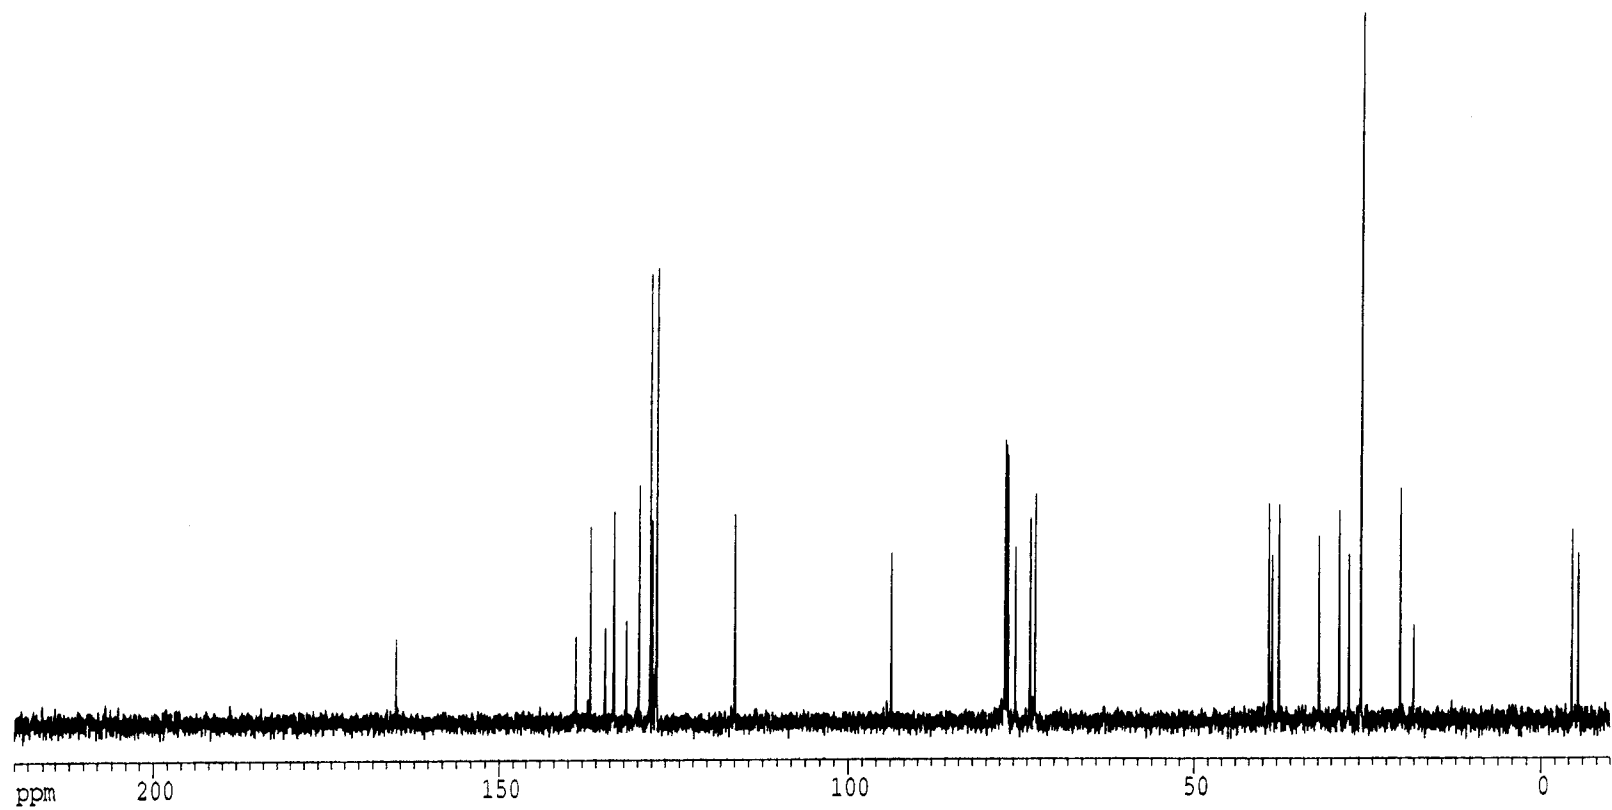

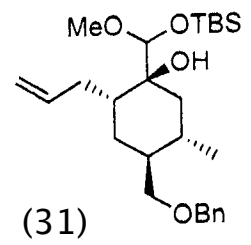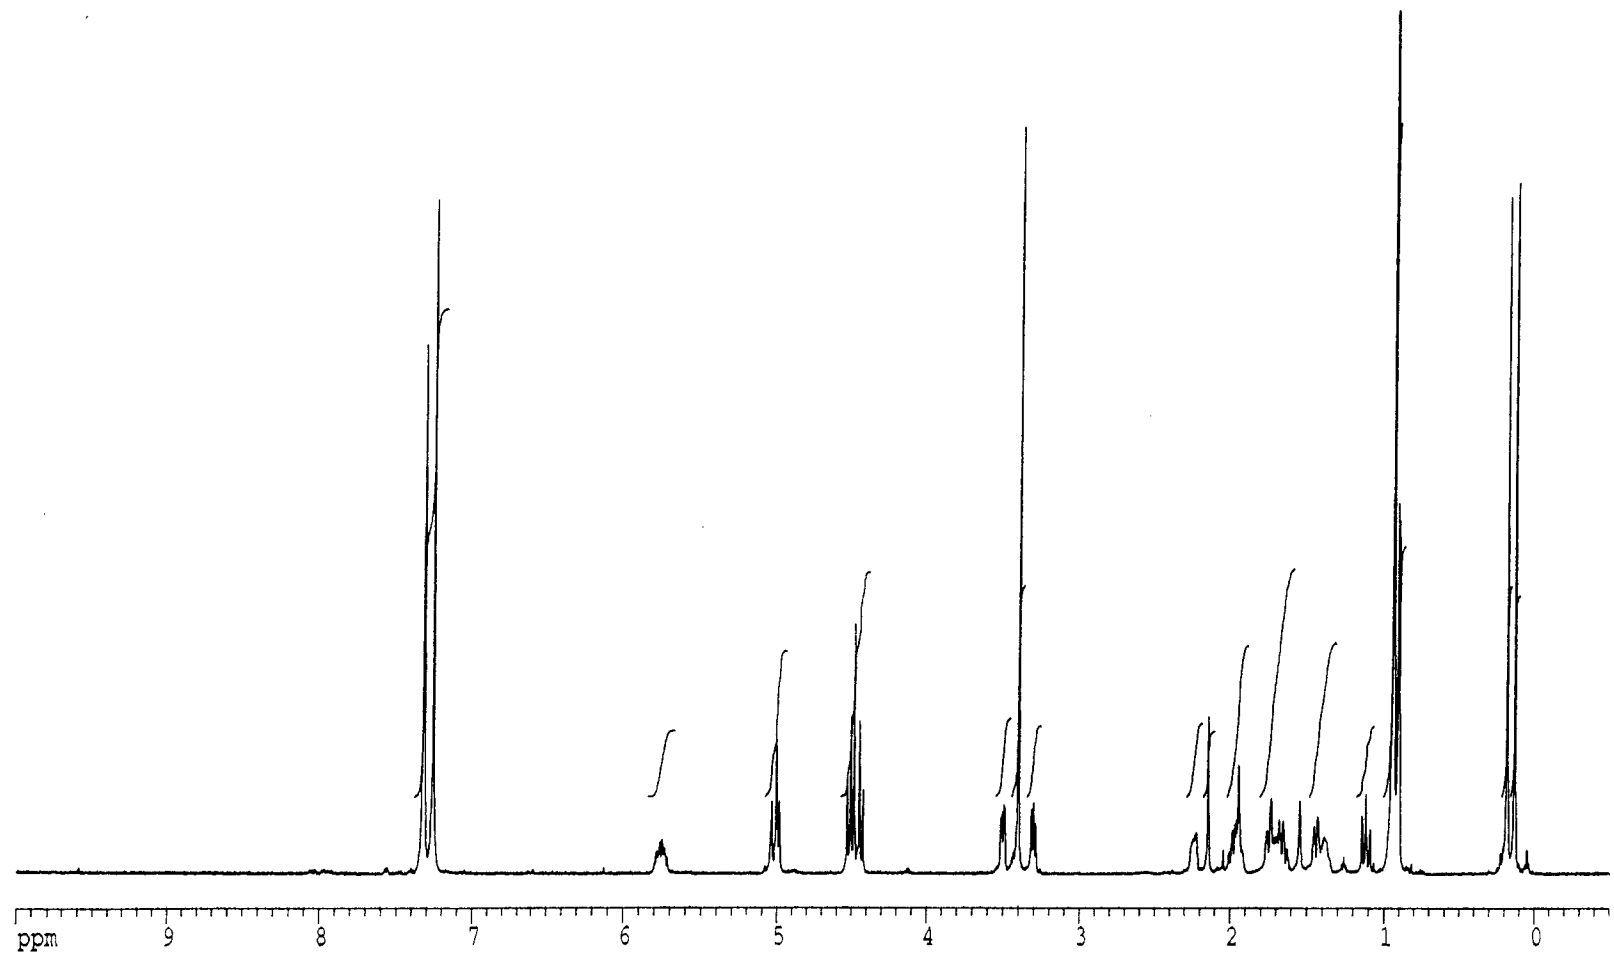

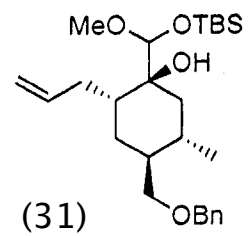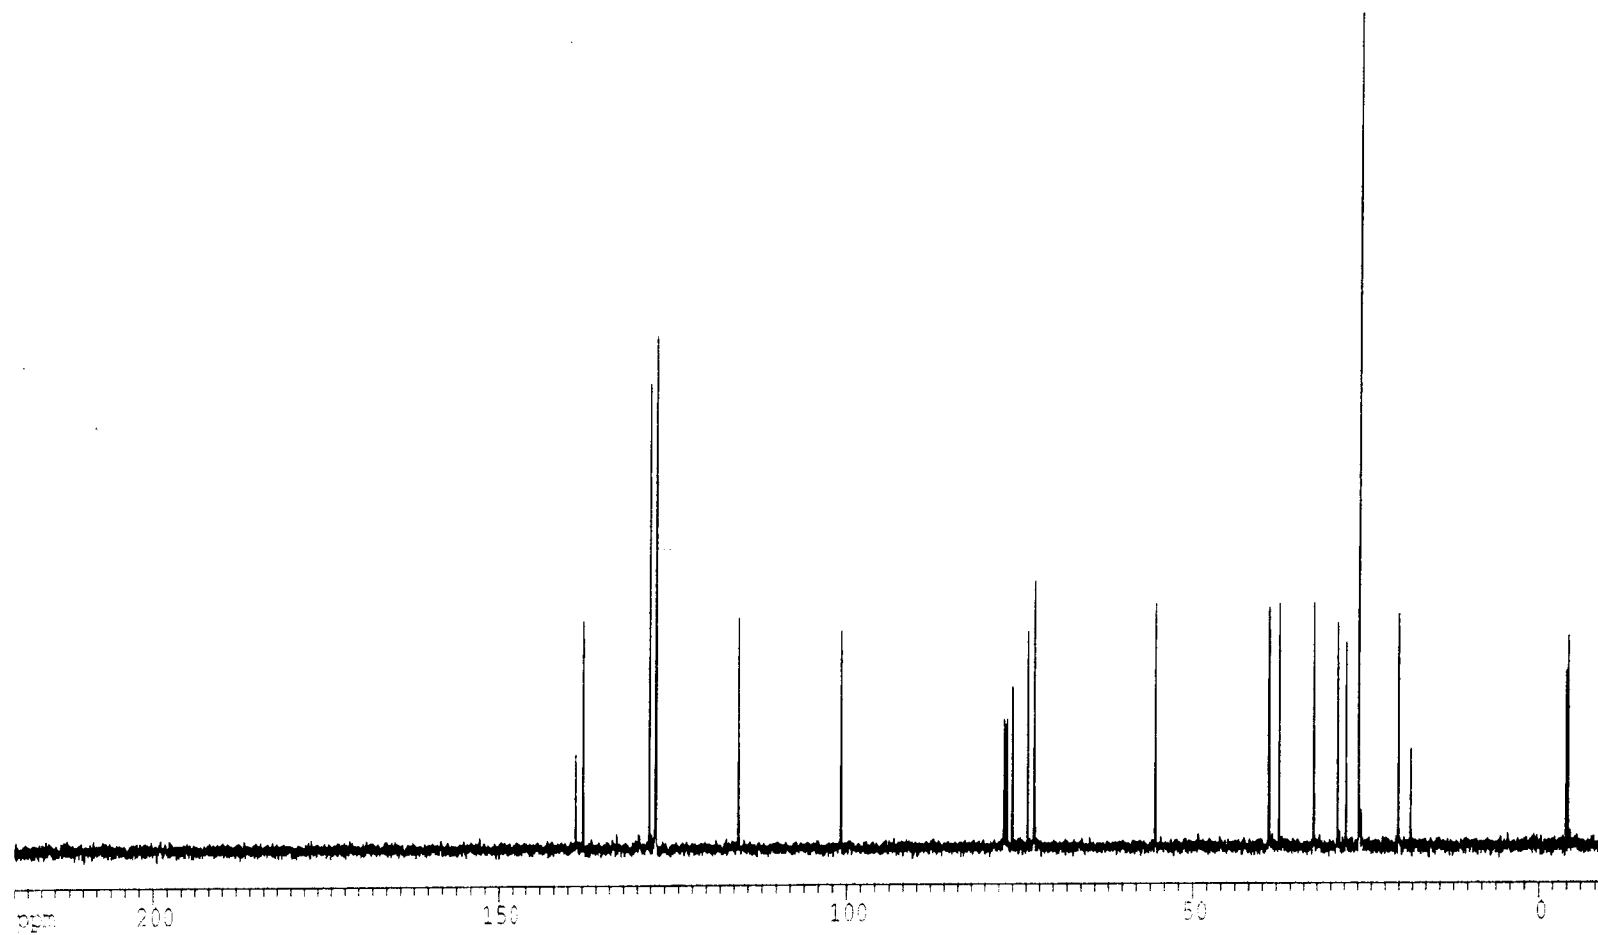

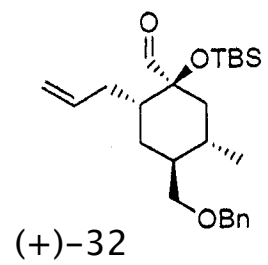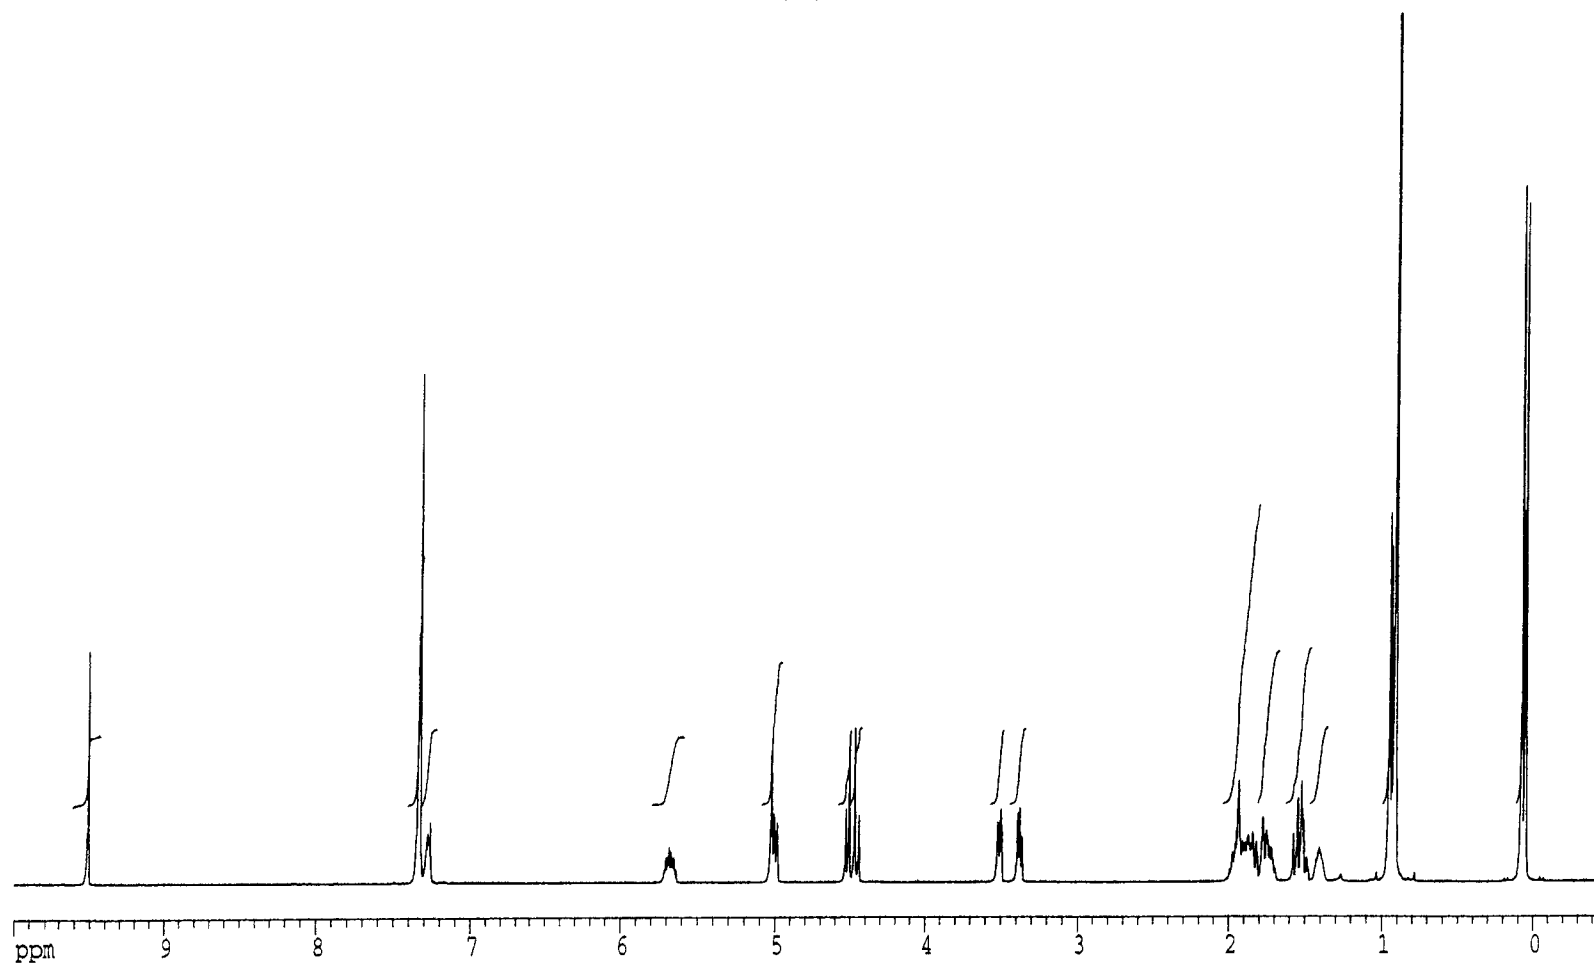

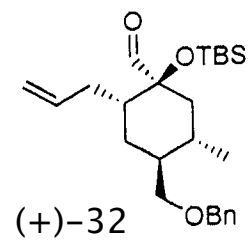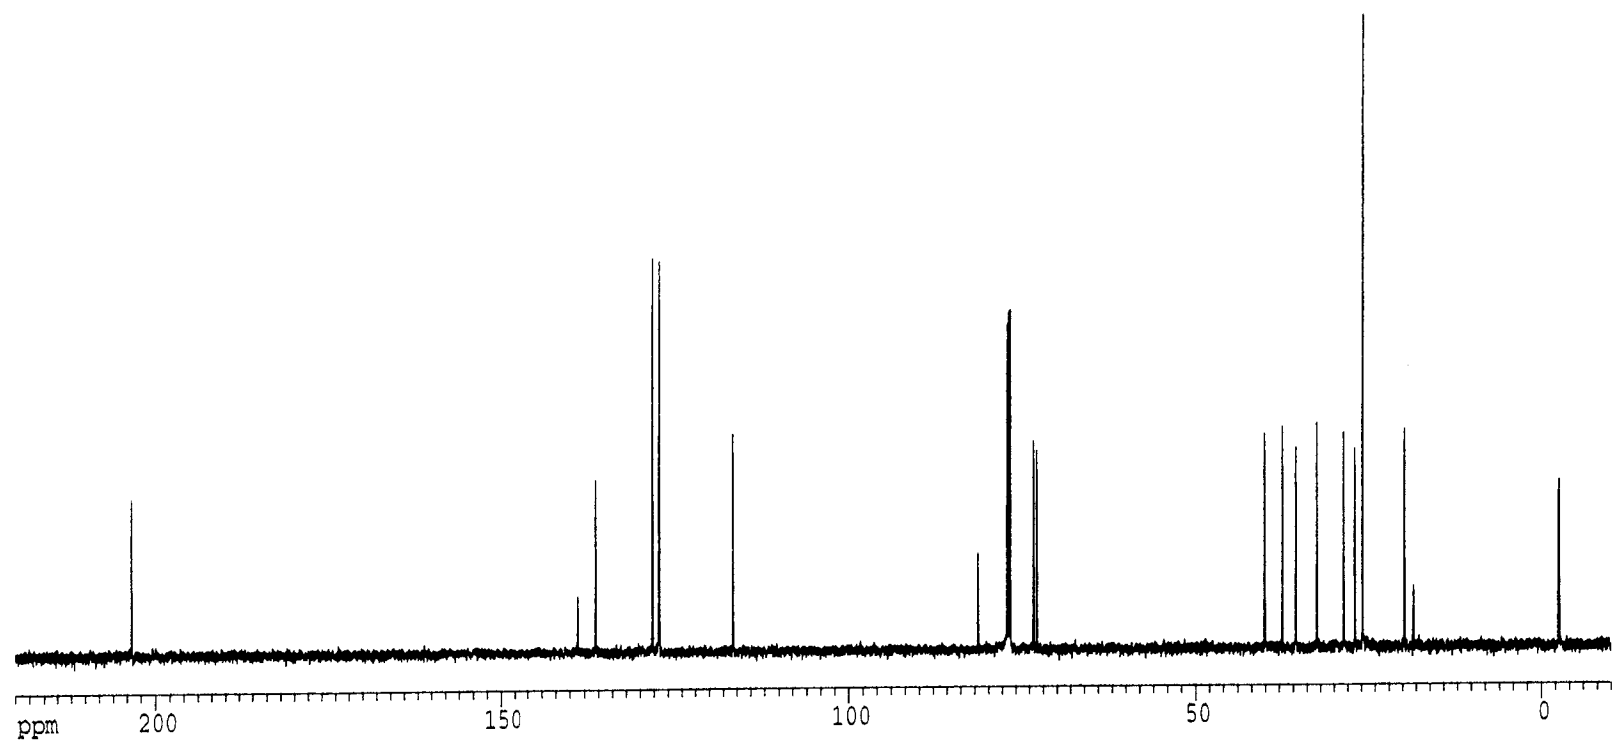

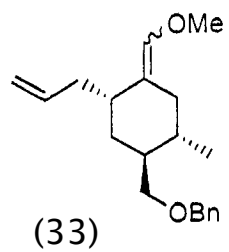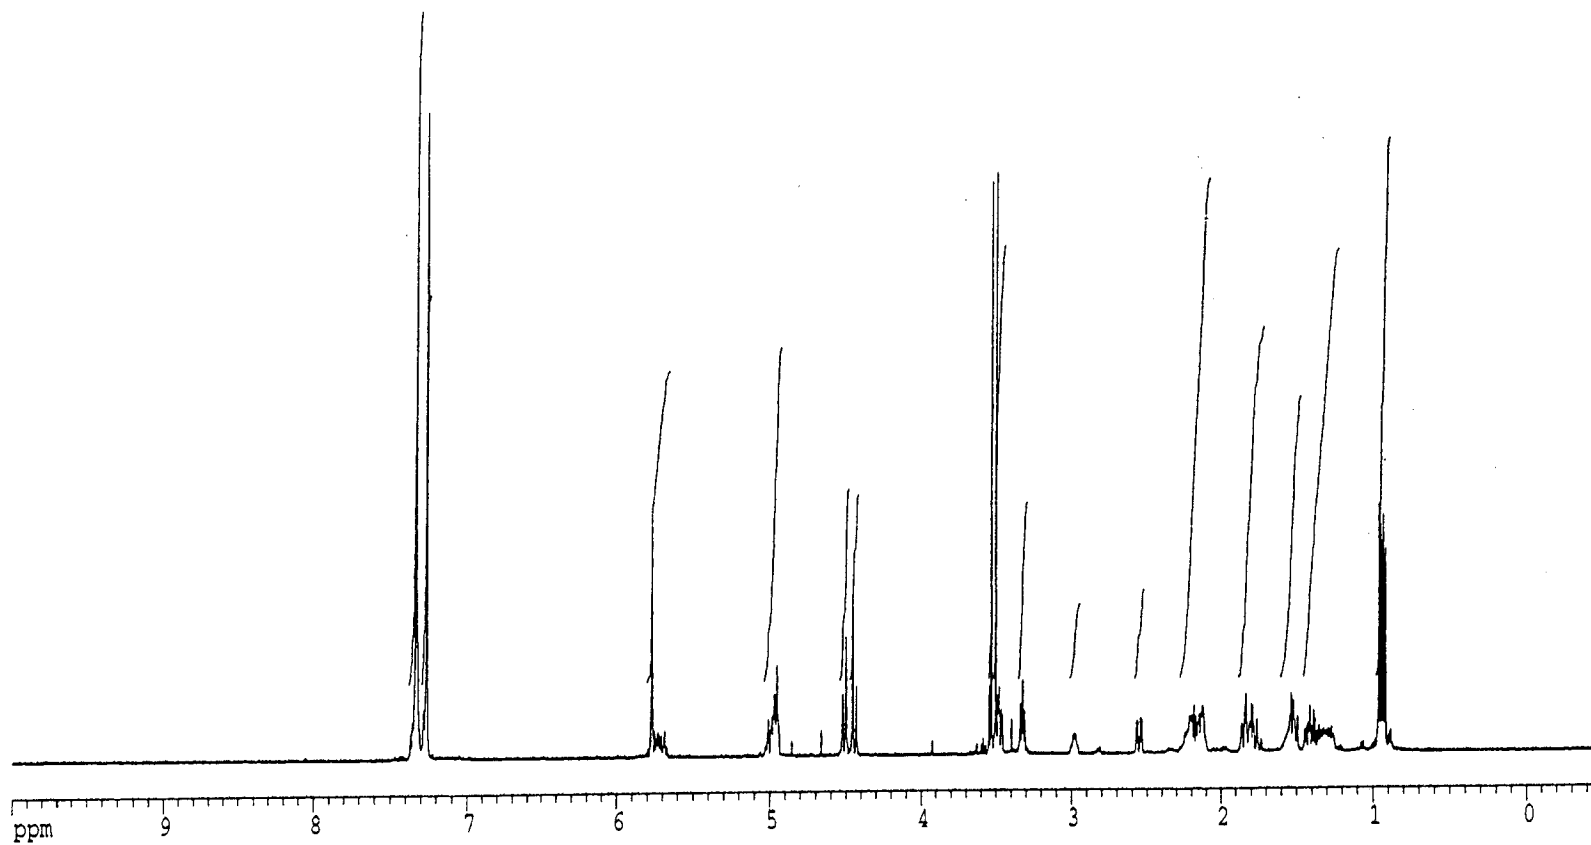

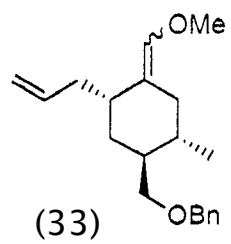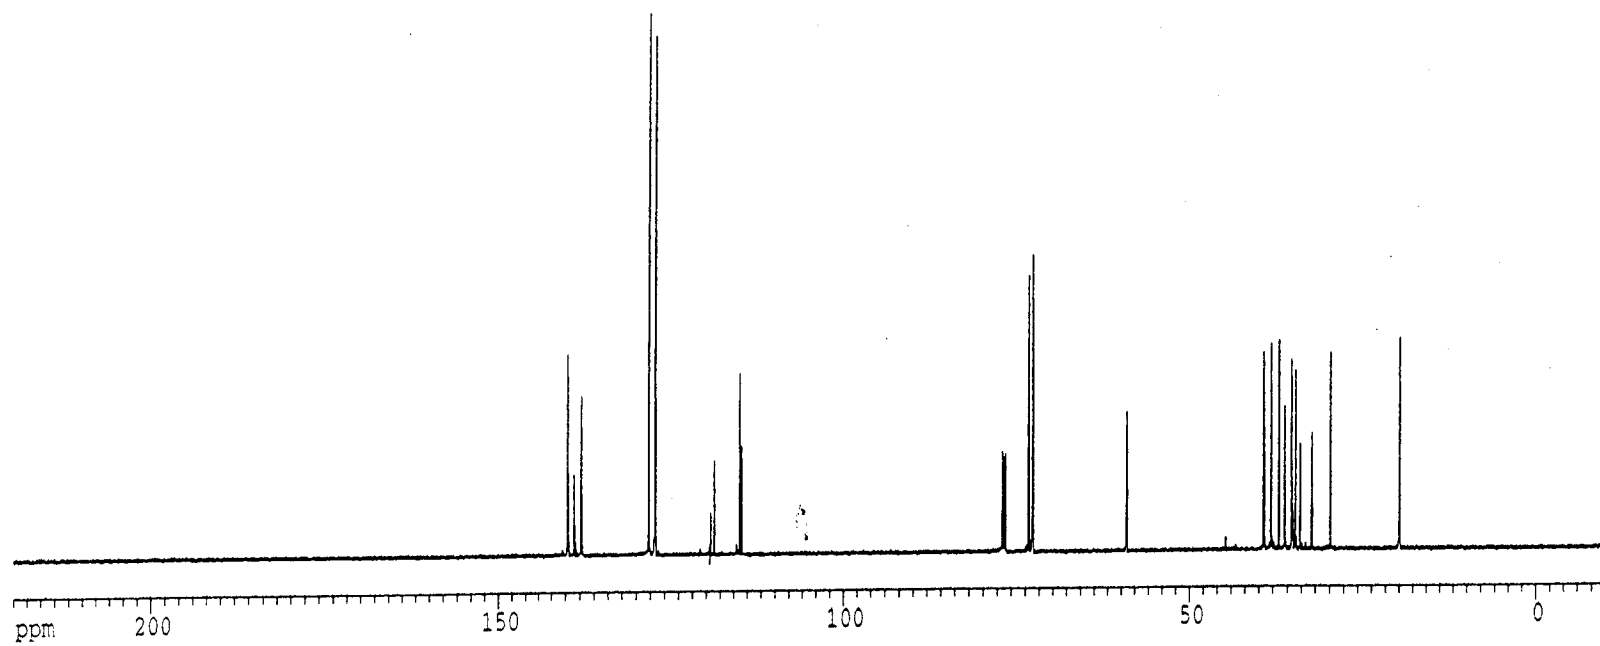

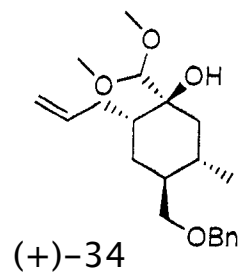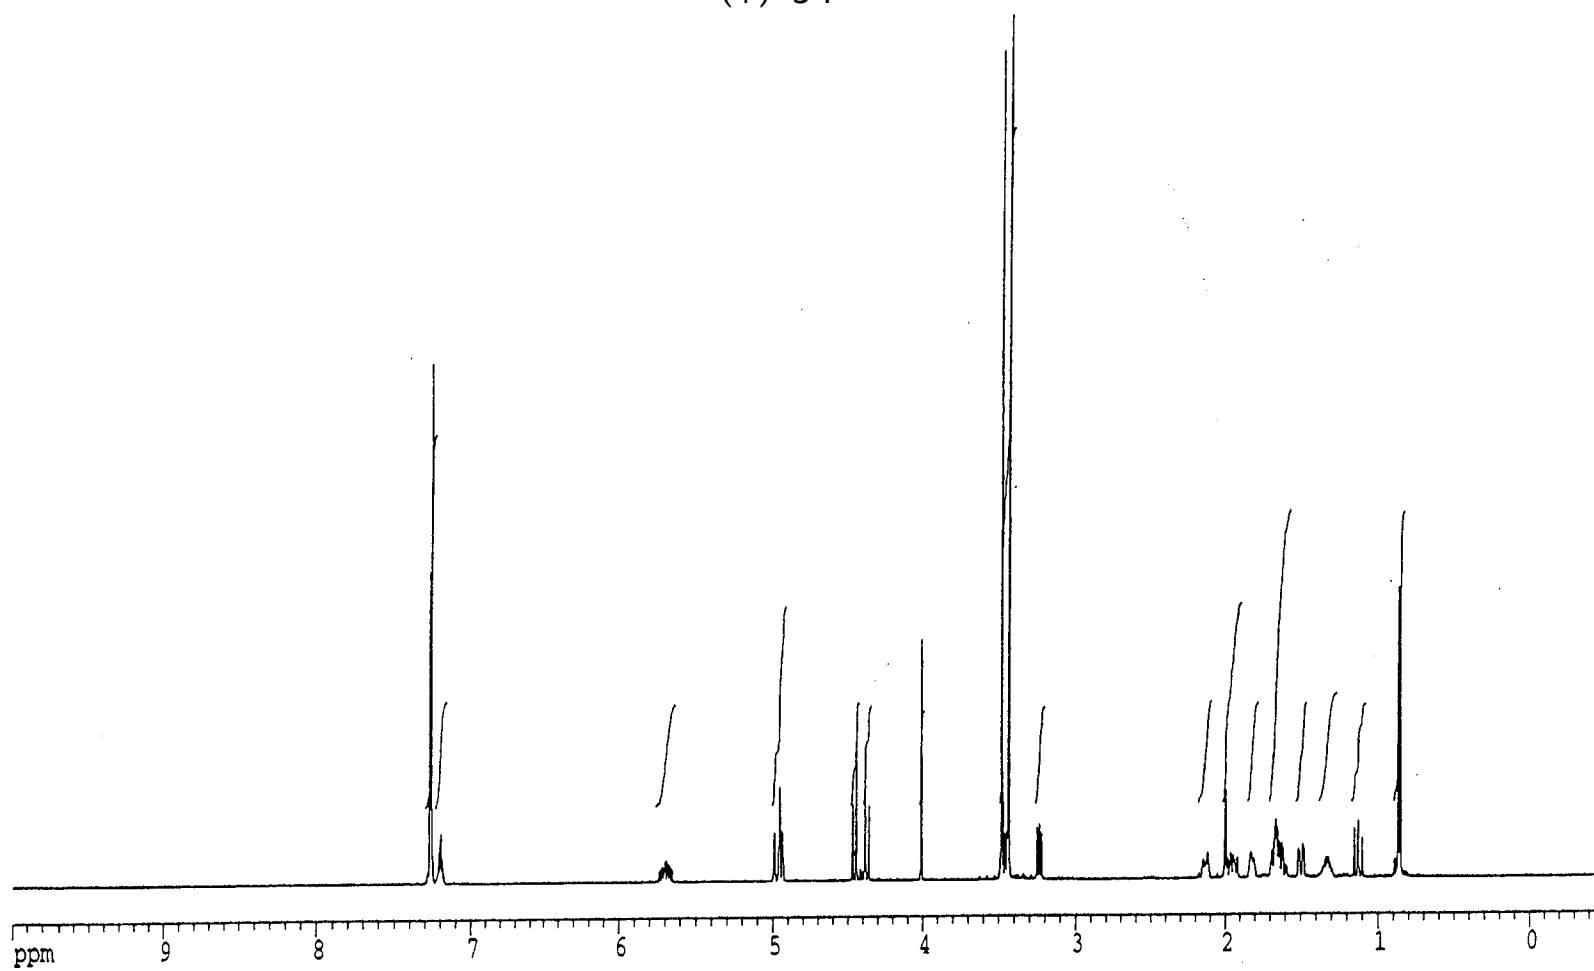

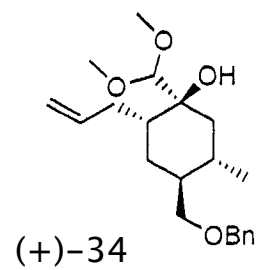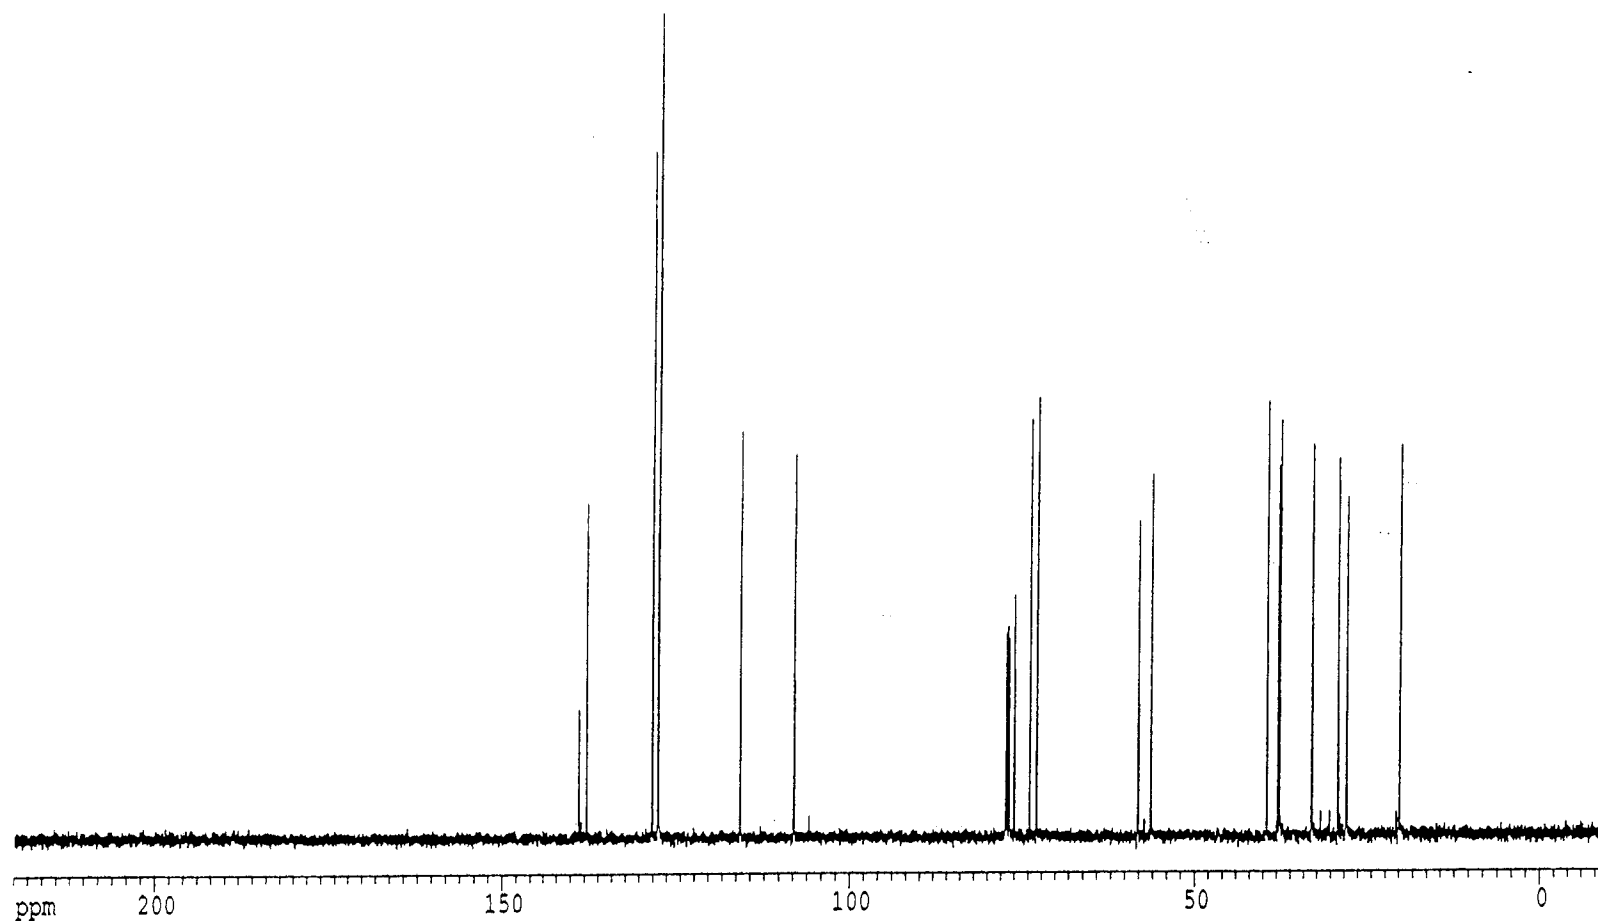

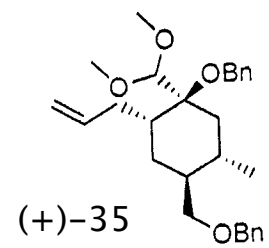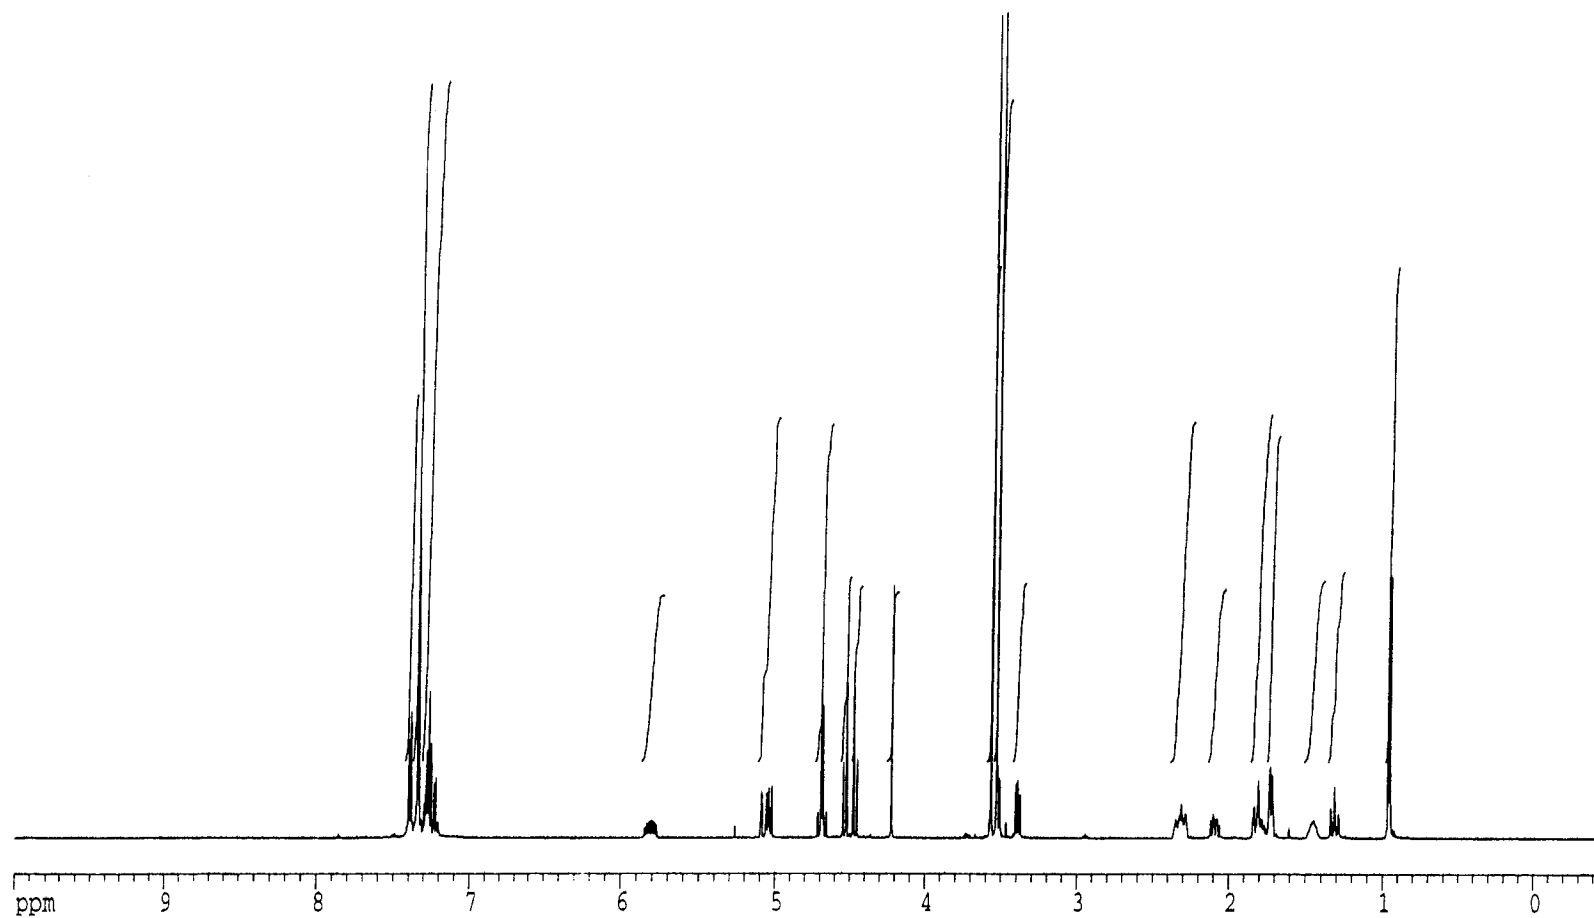

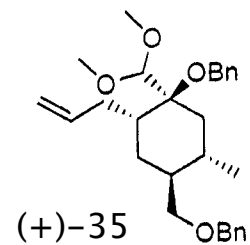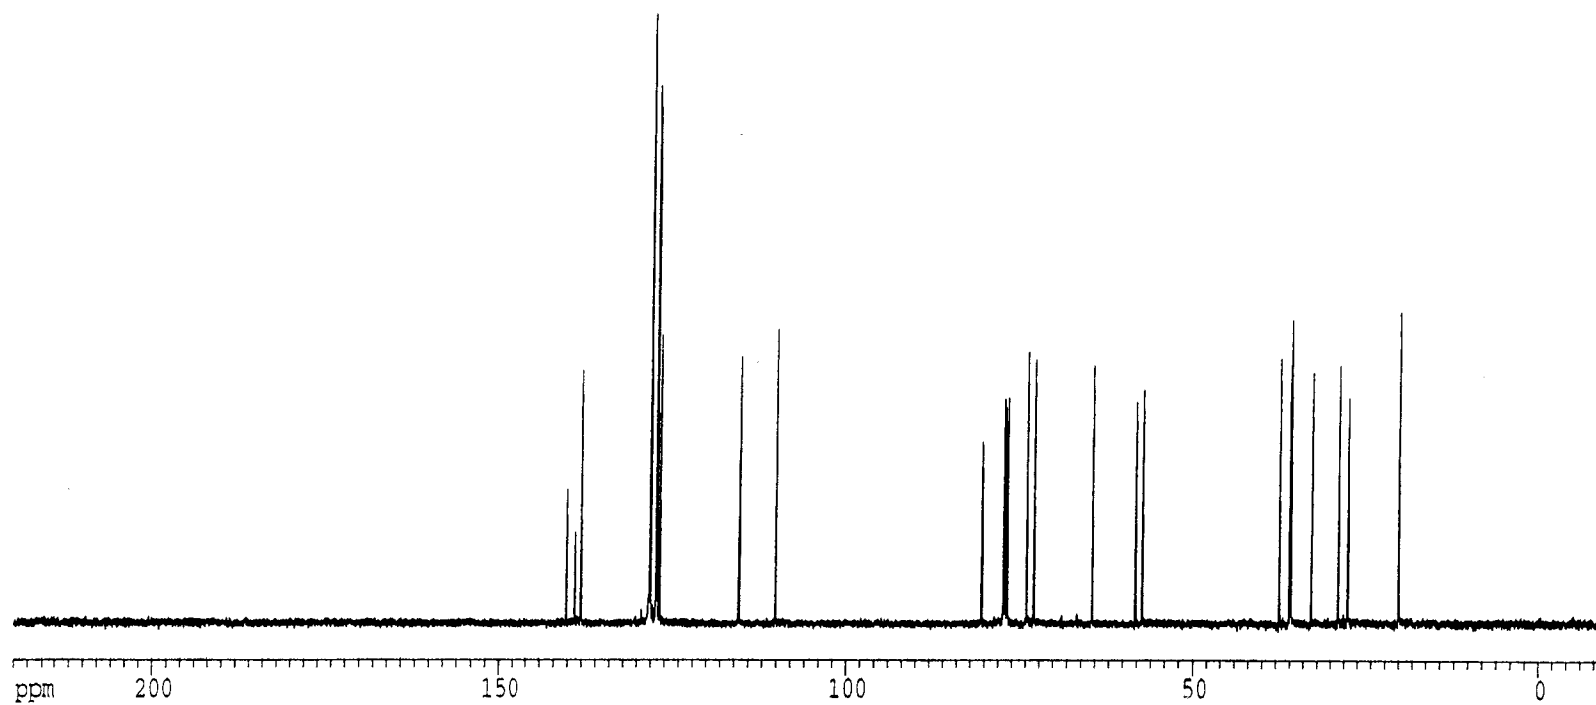

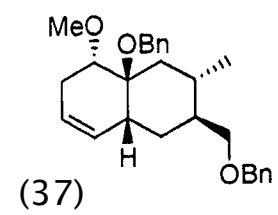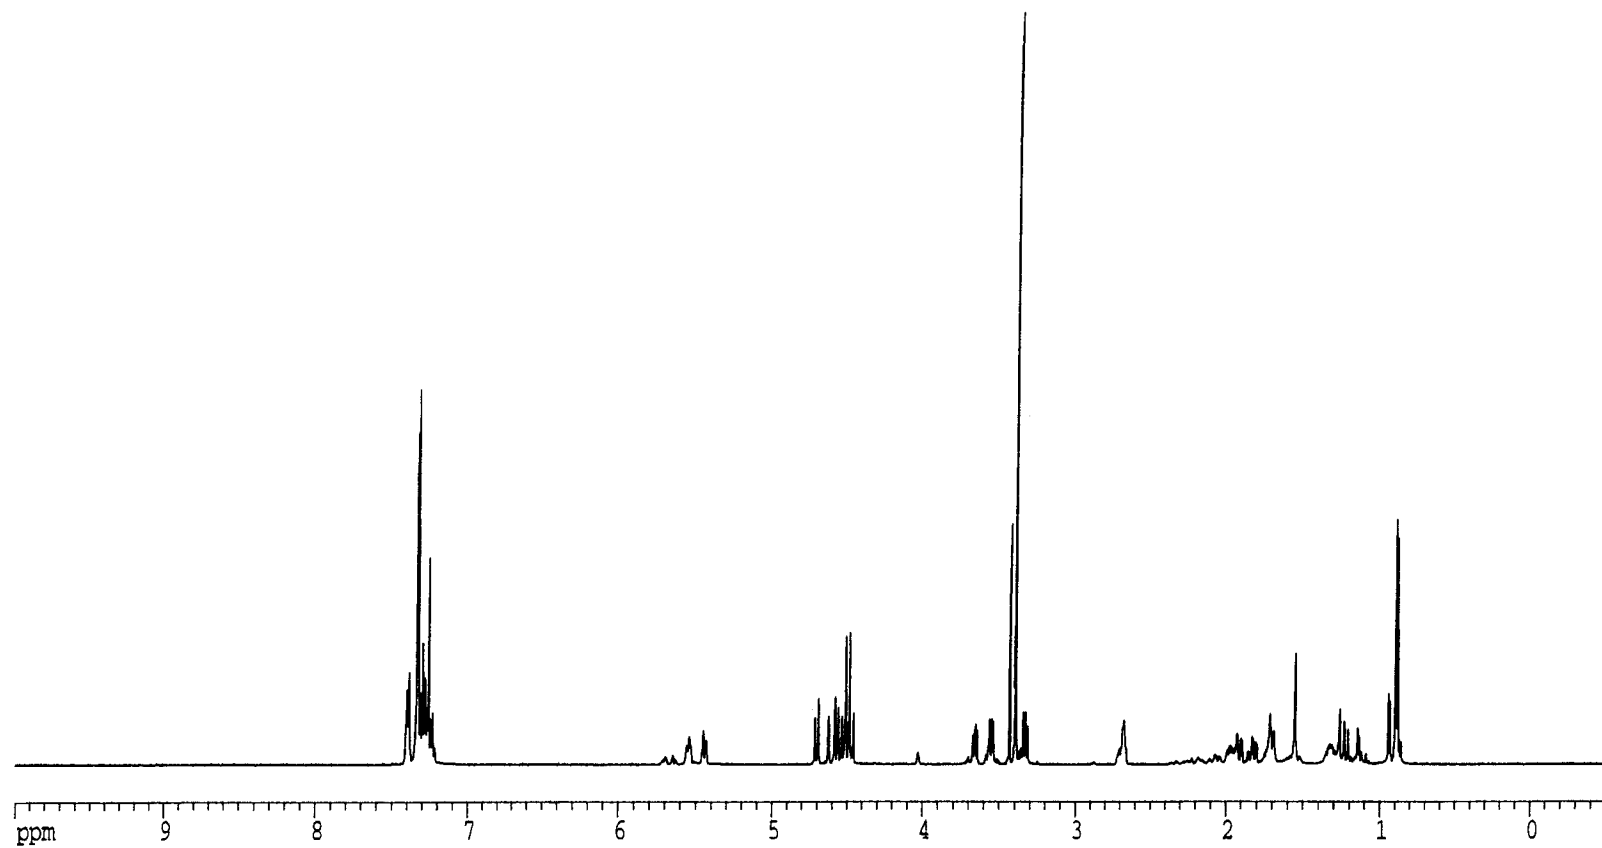

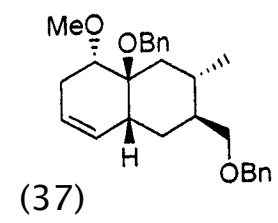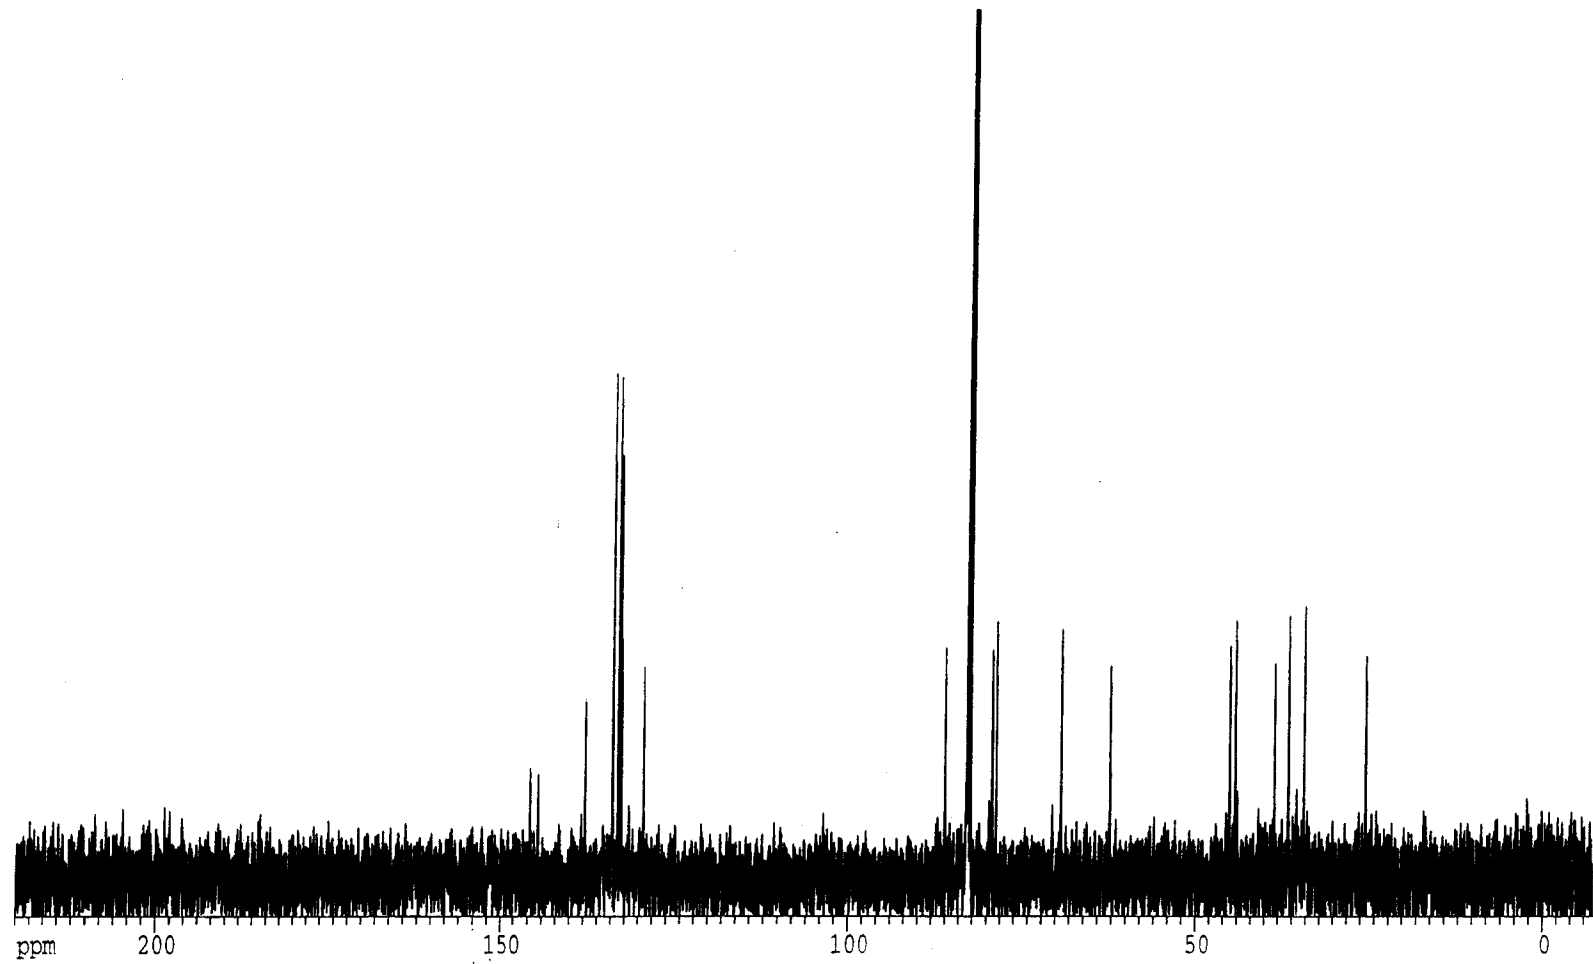

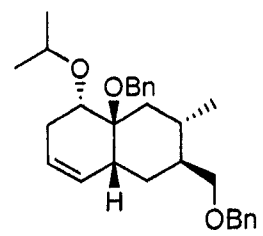

(+)-36

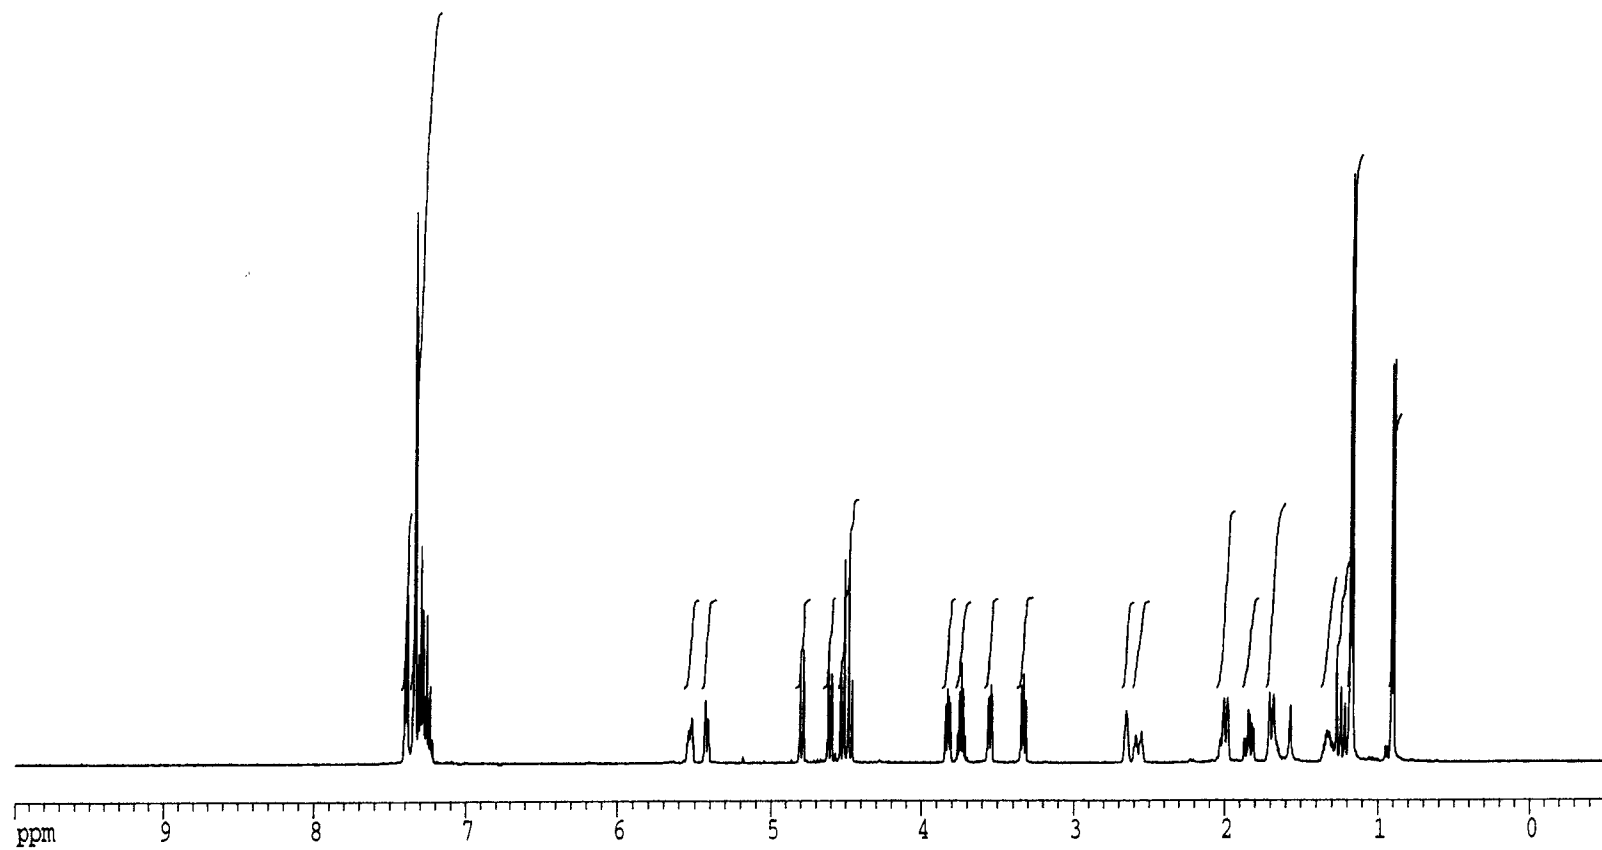

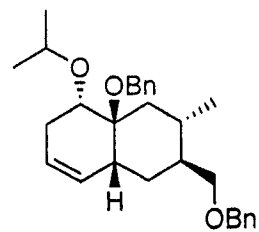

(+)-36

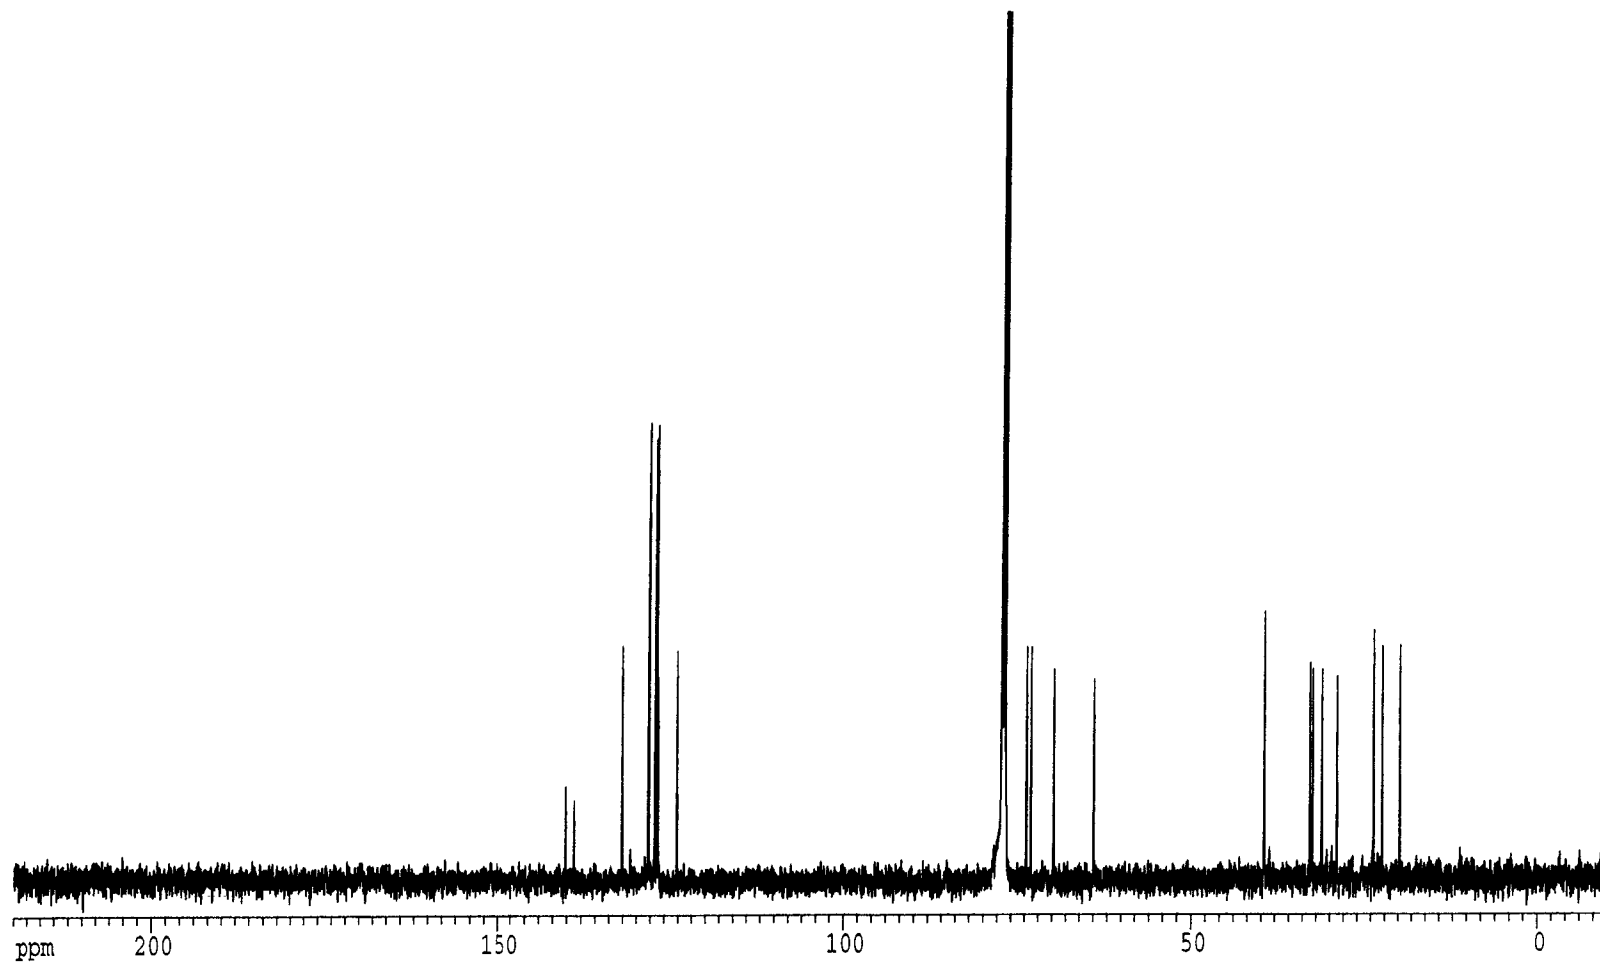

(+)-38

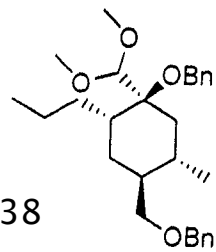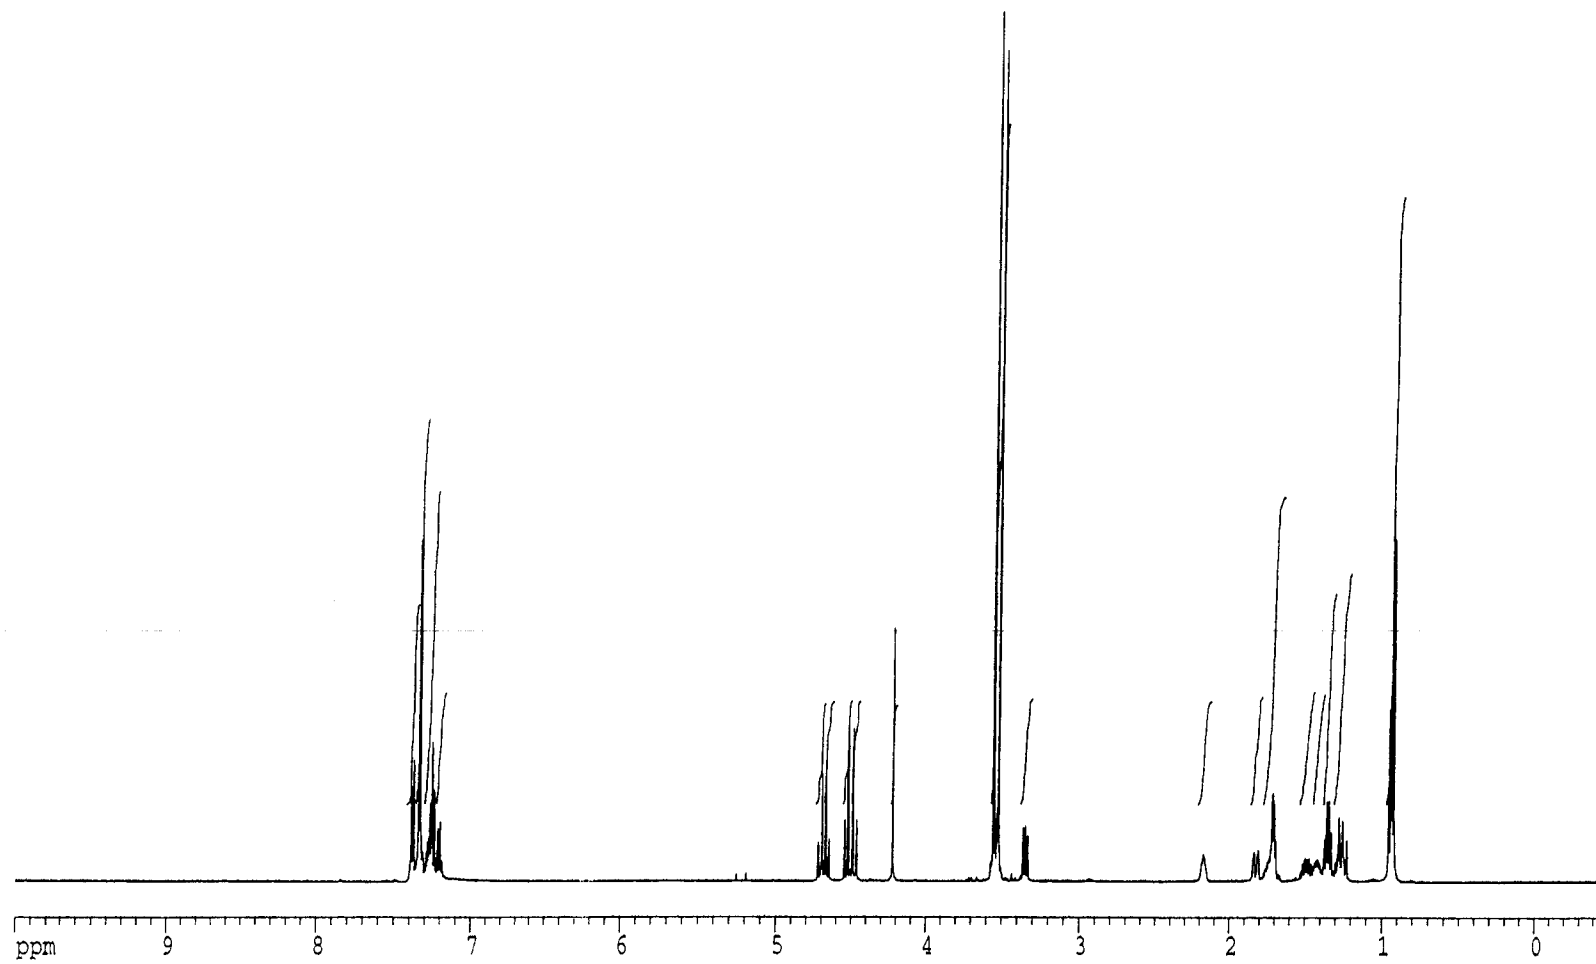

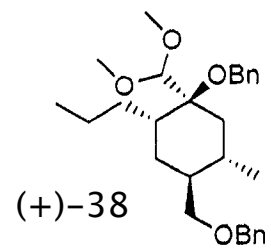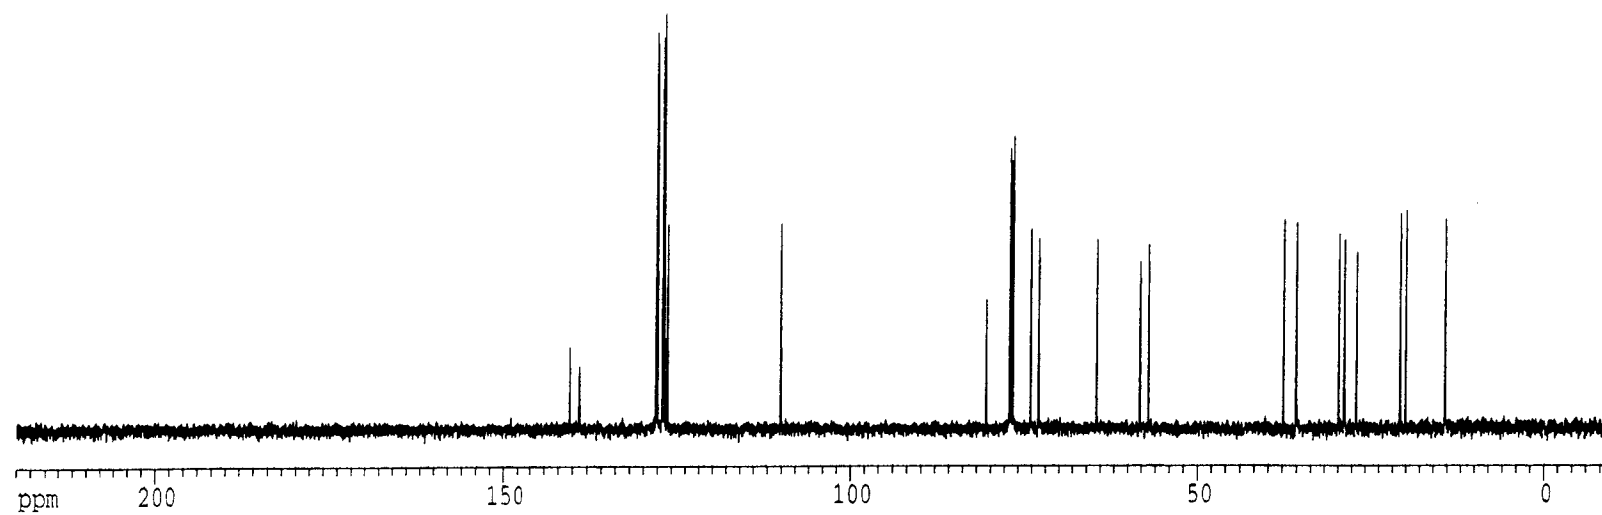

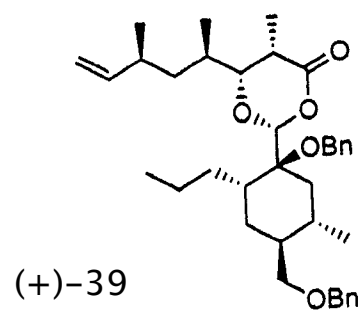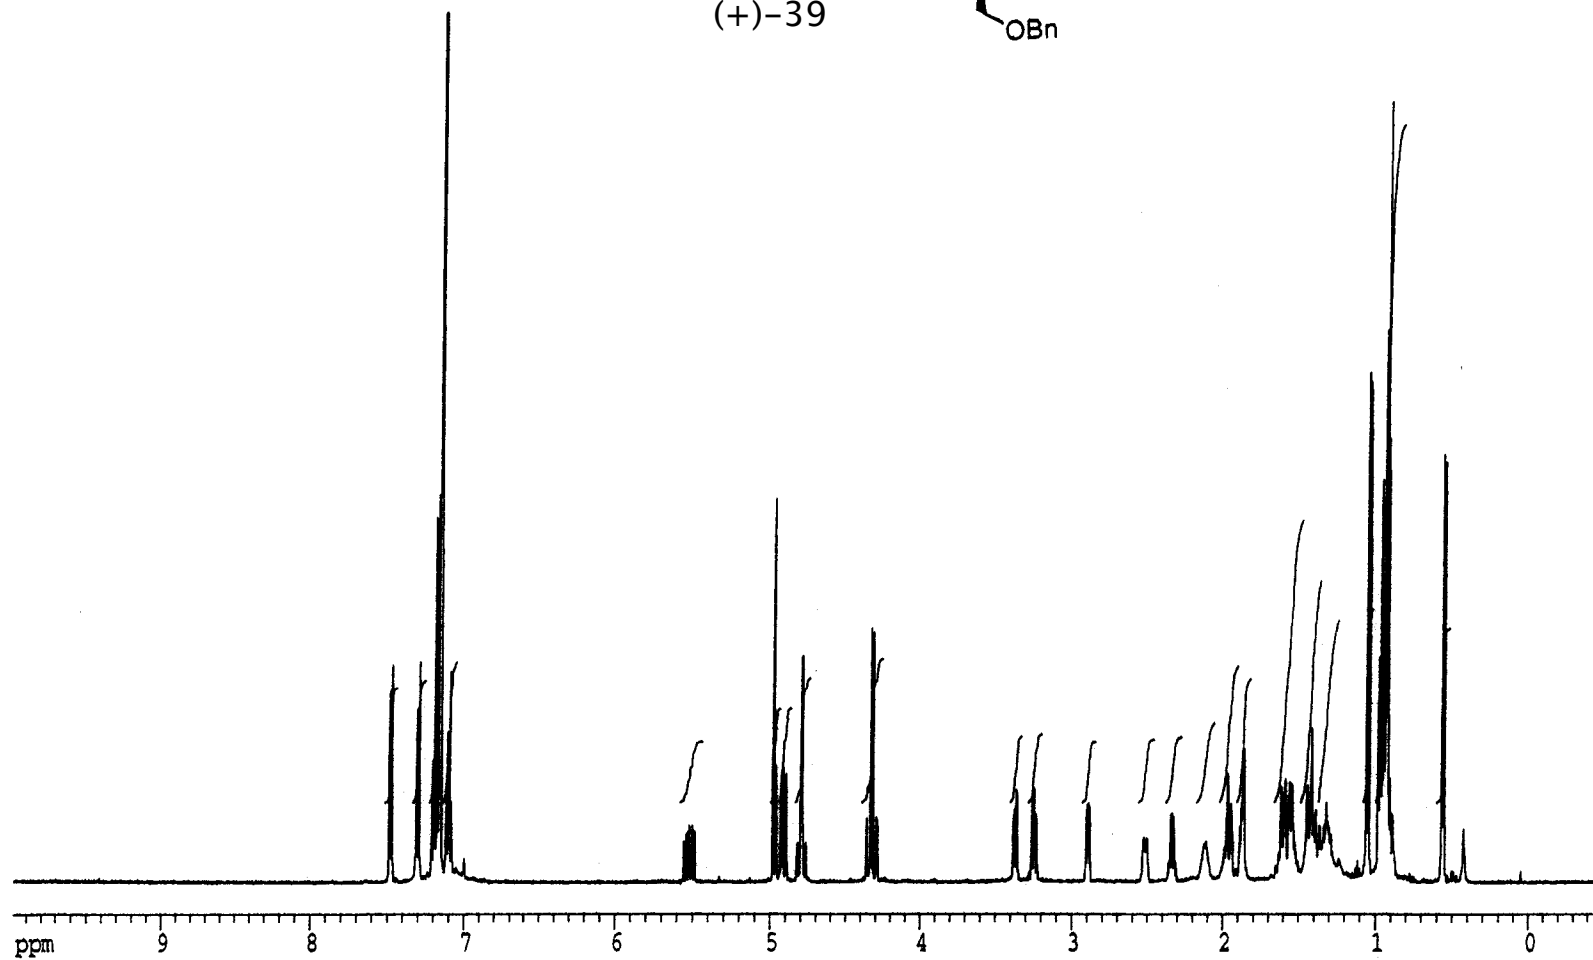

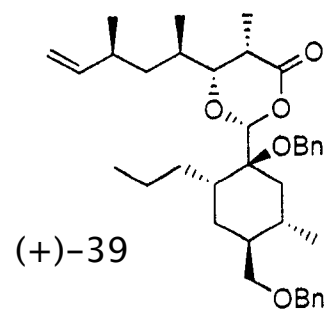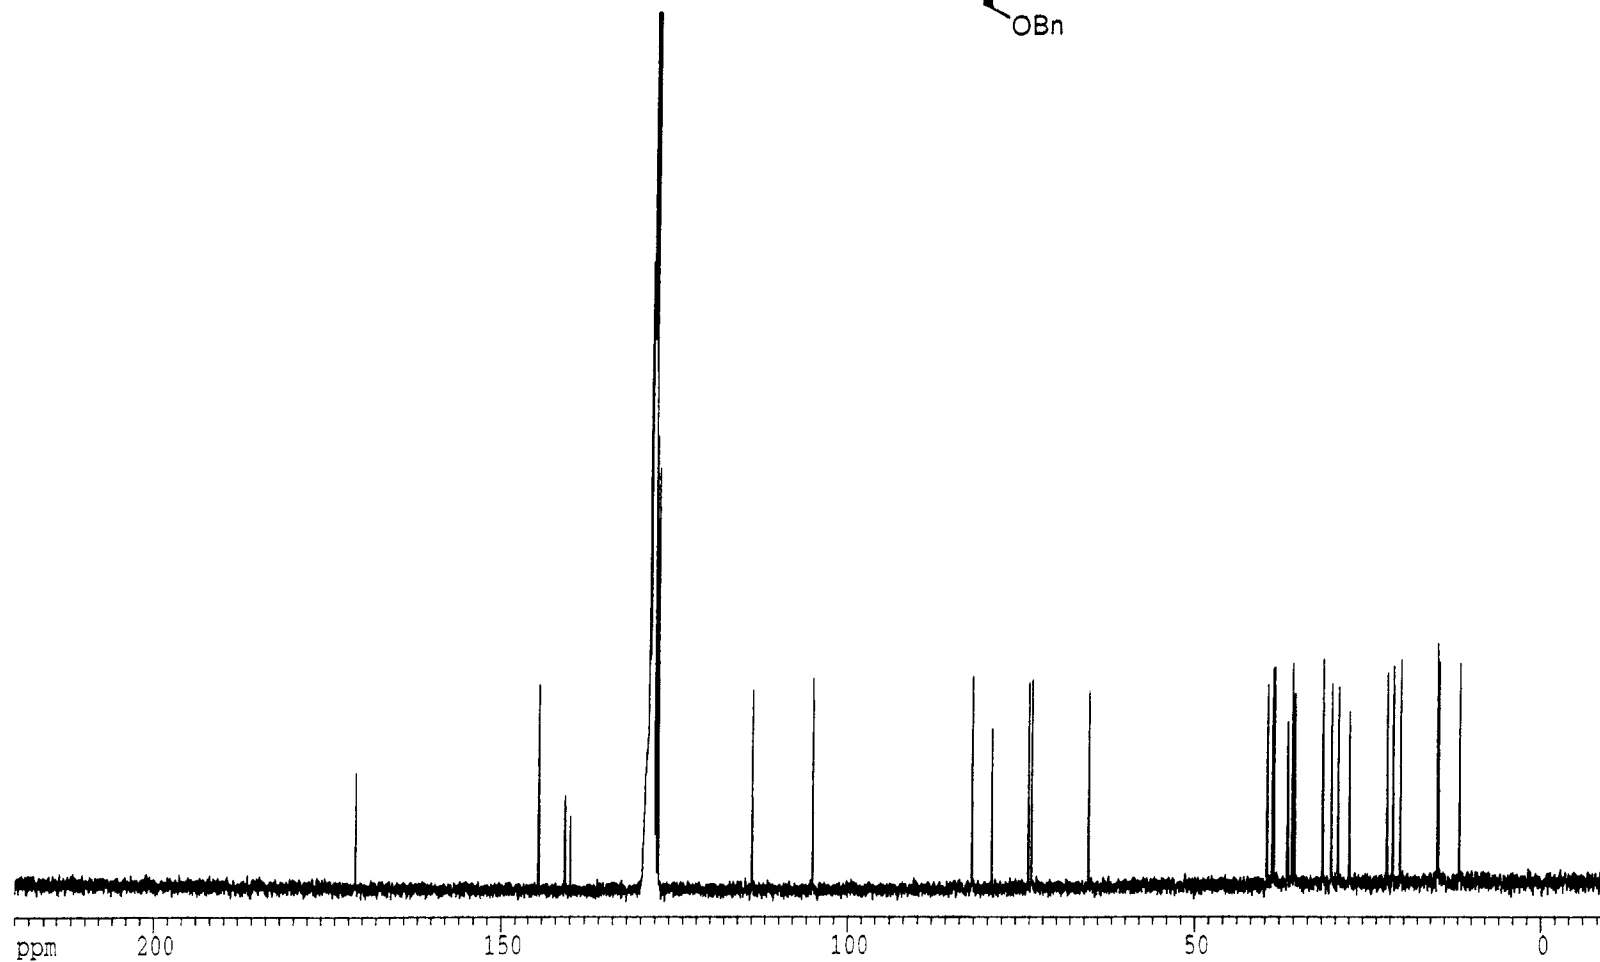

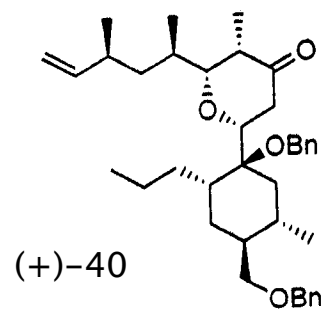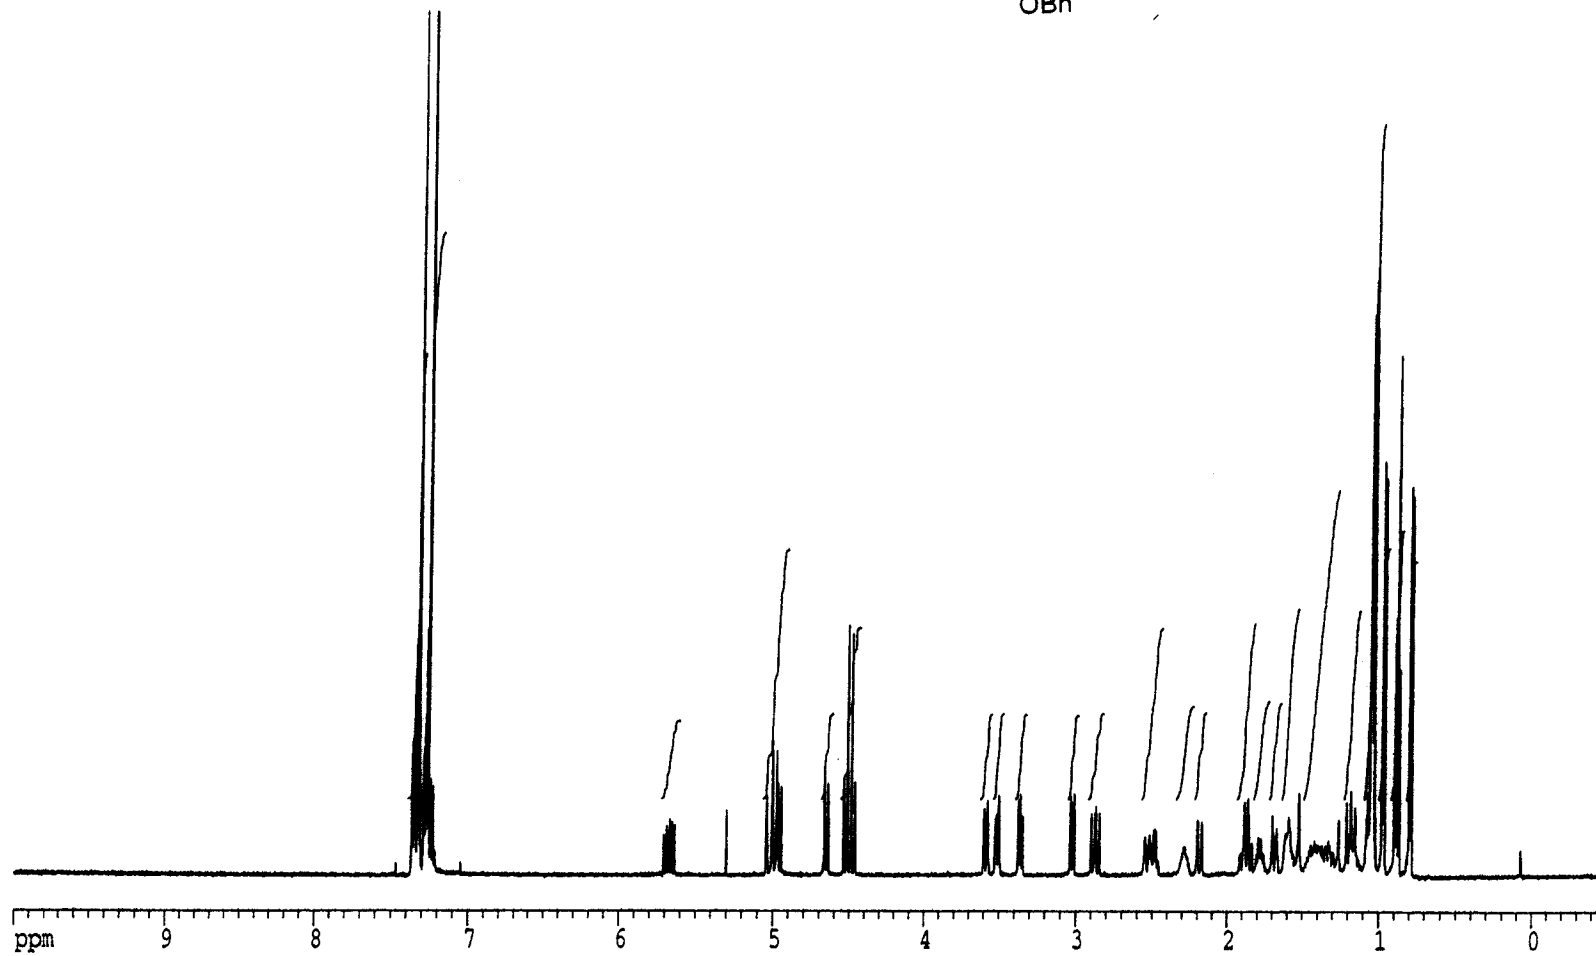

(+)-40

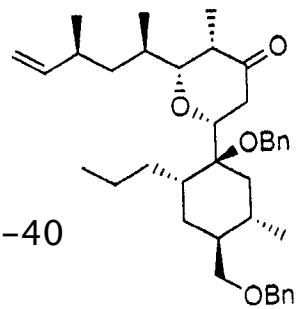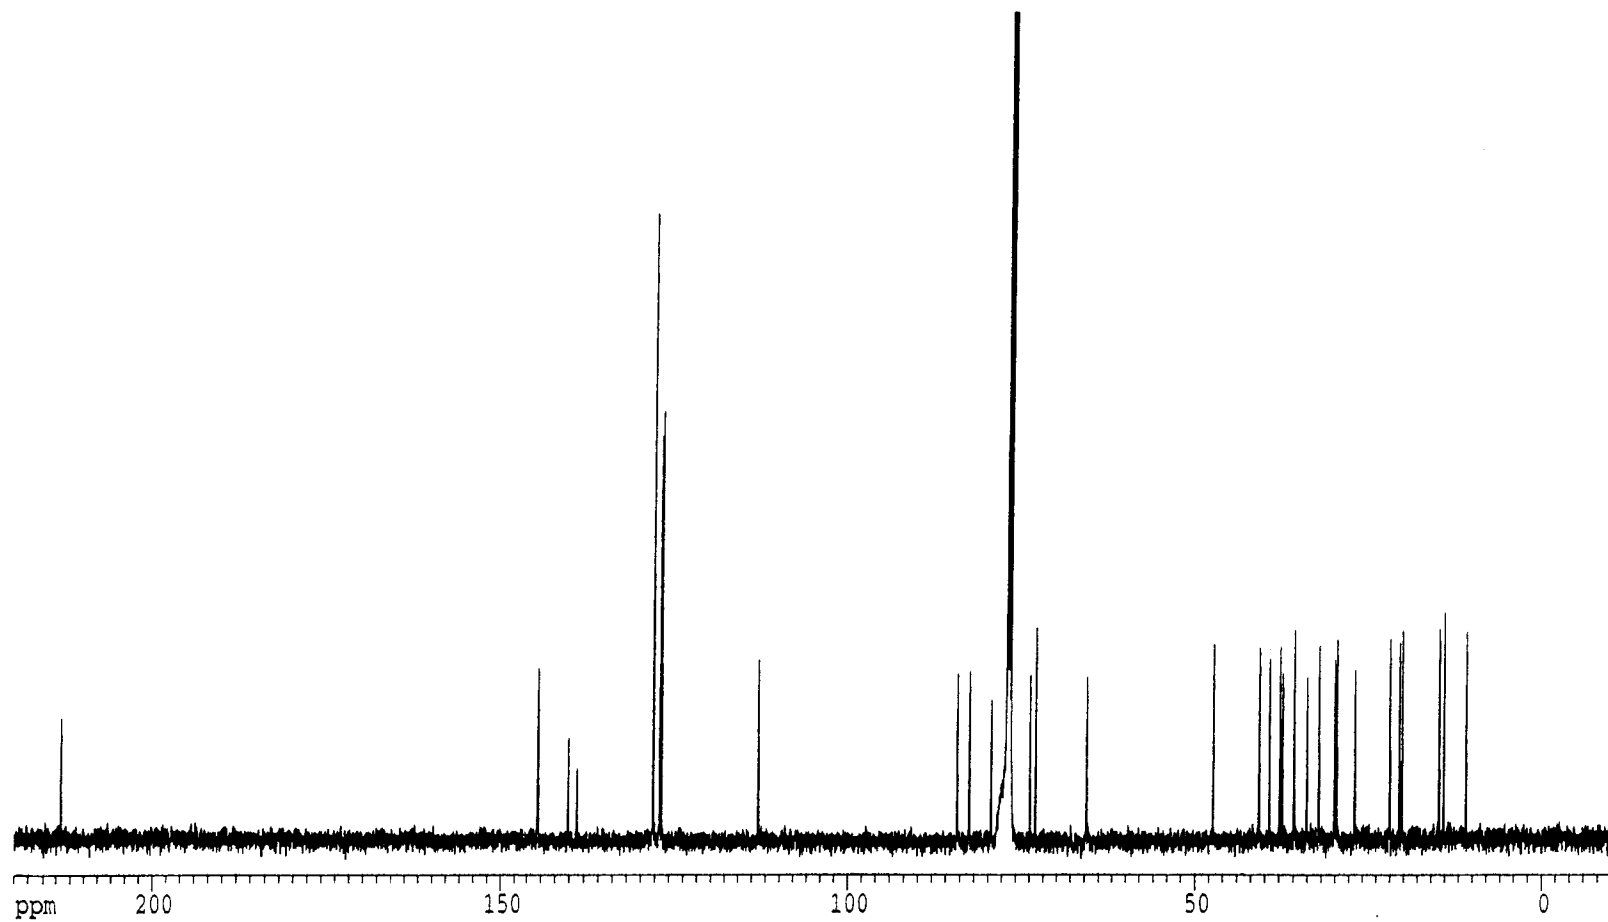

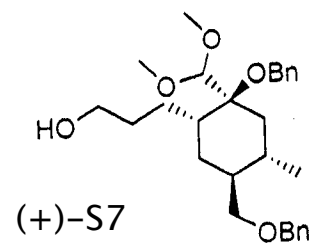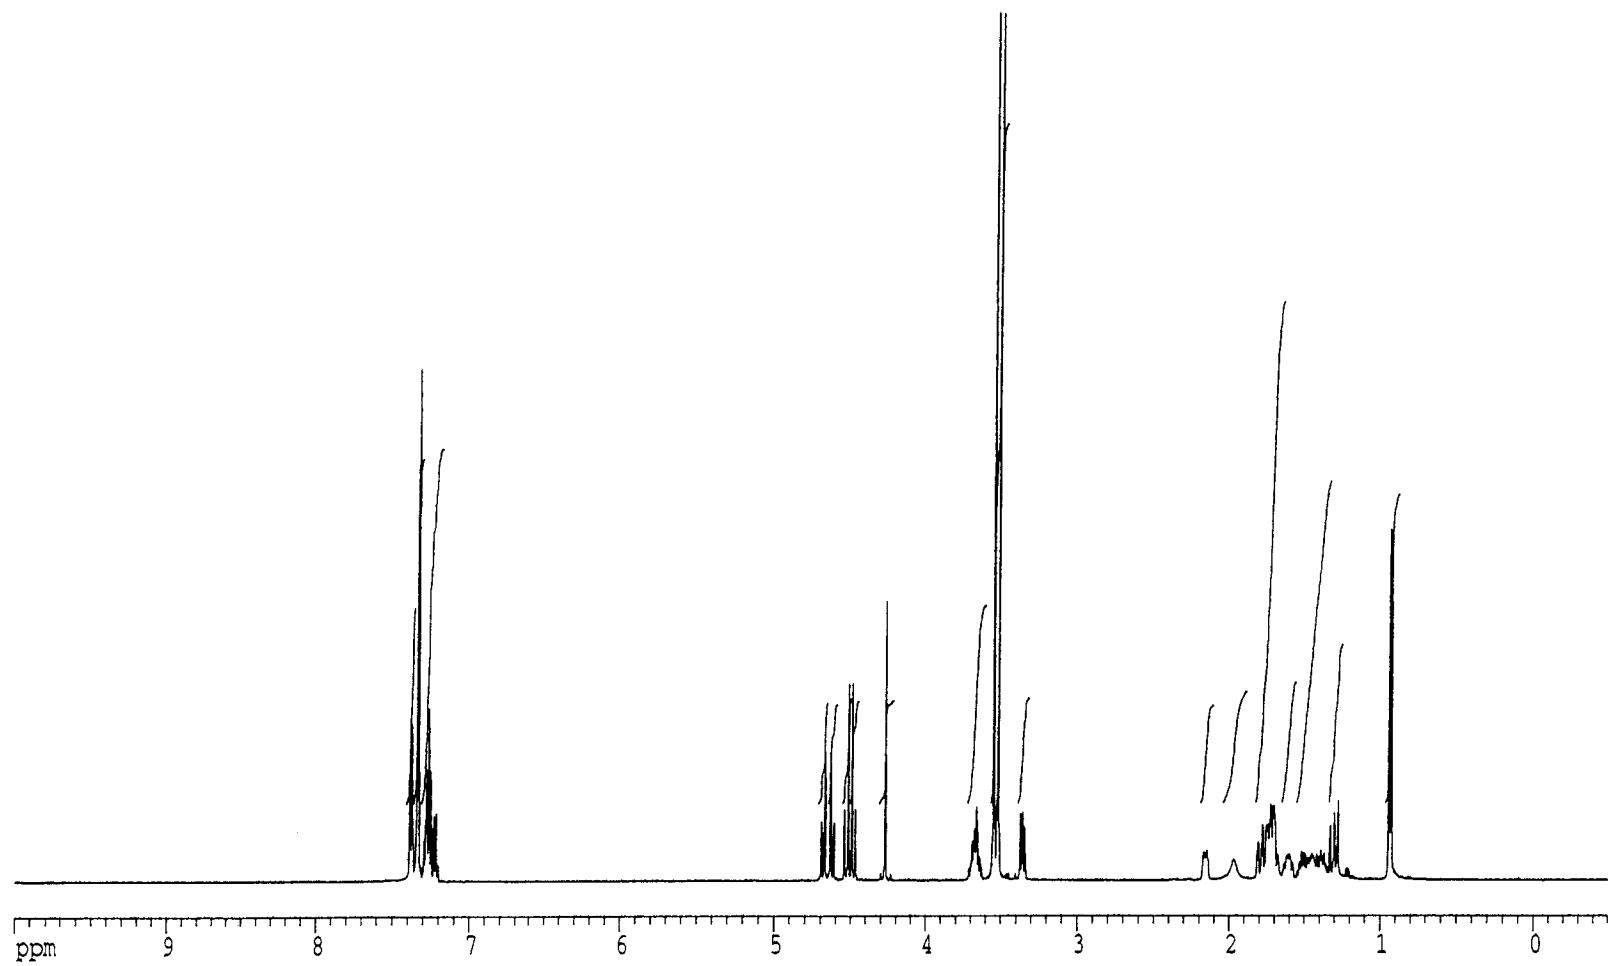

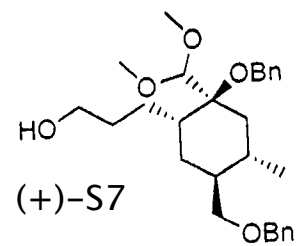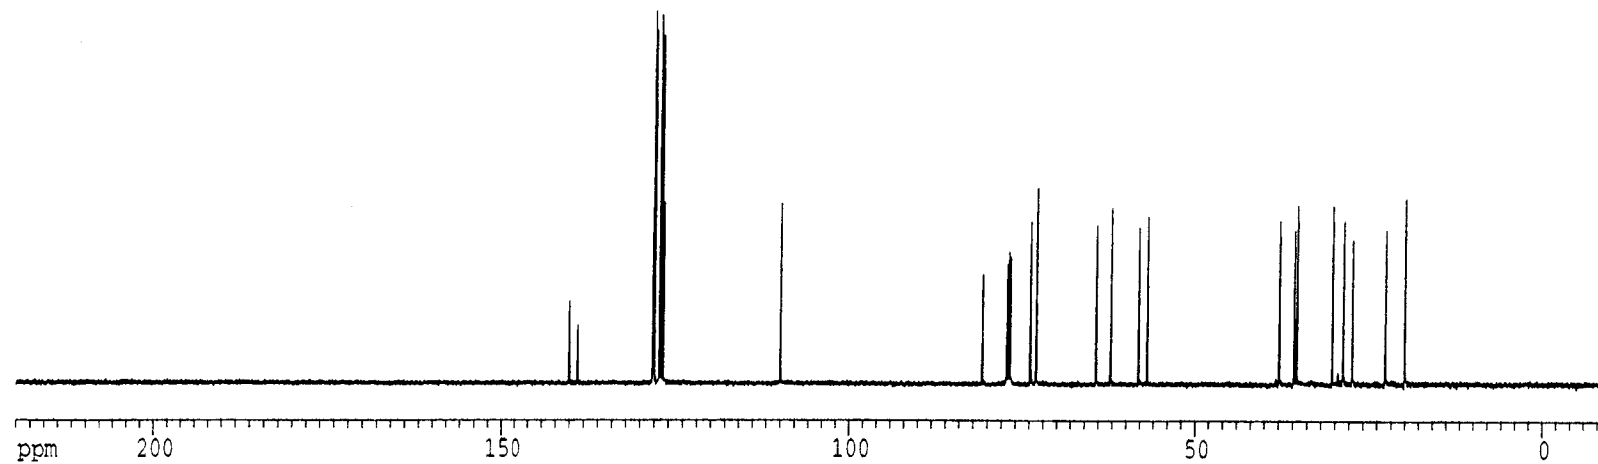

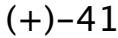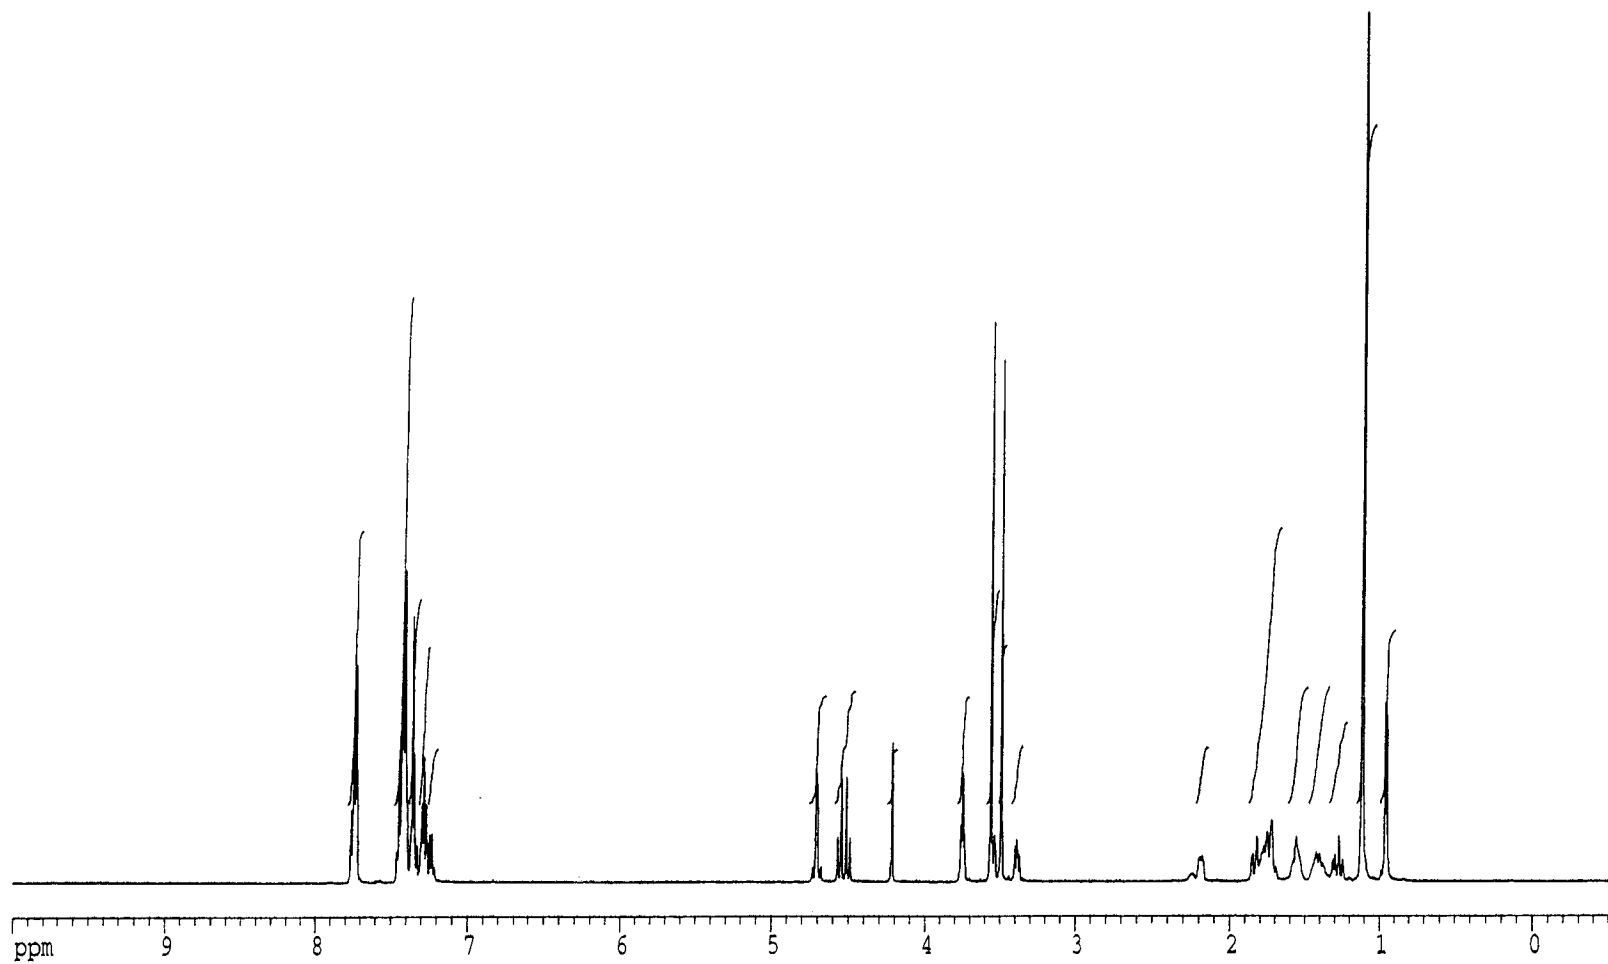

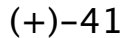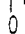

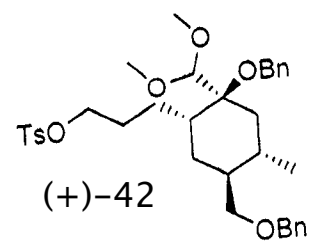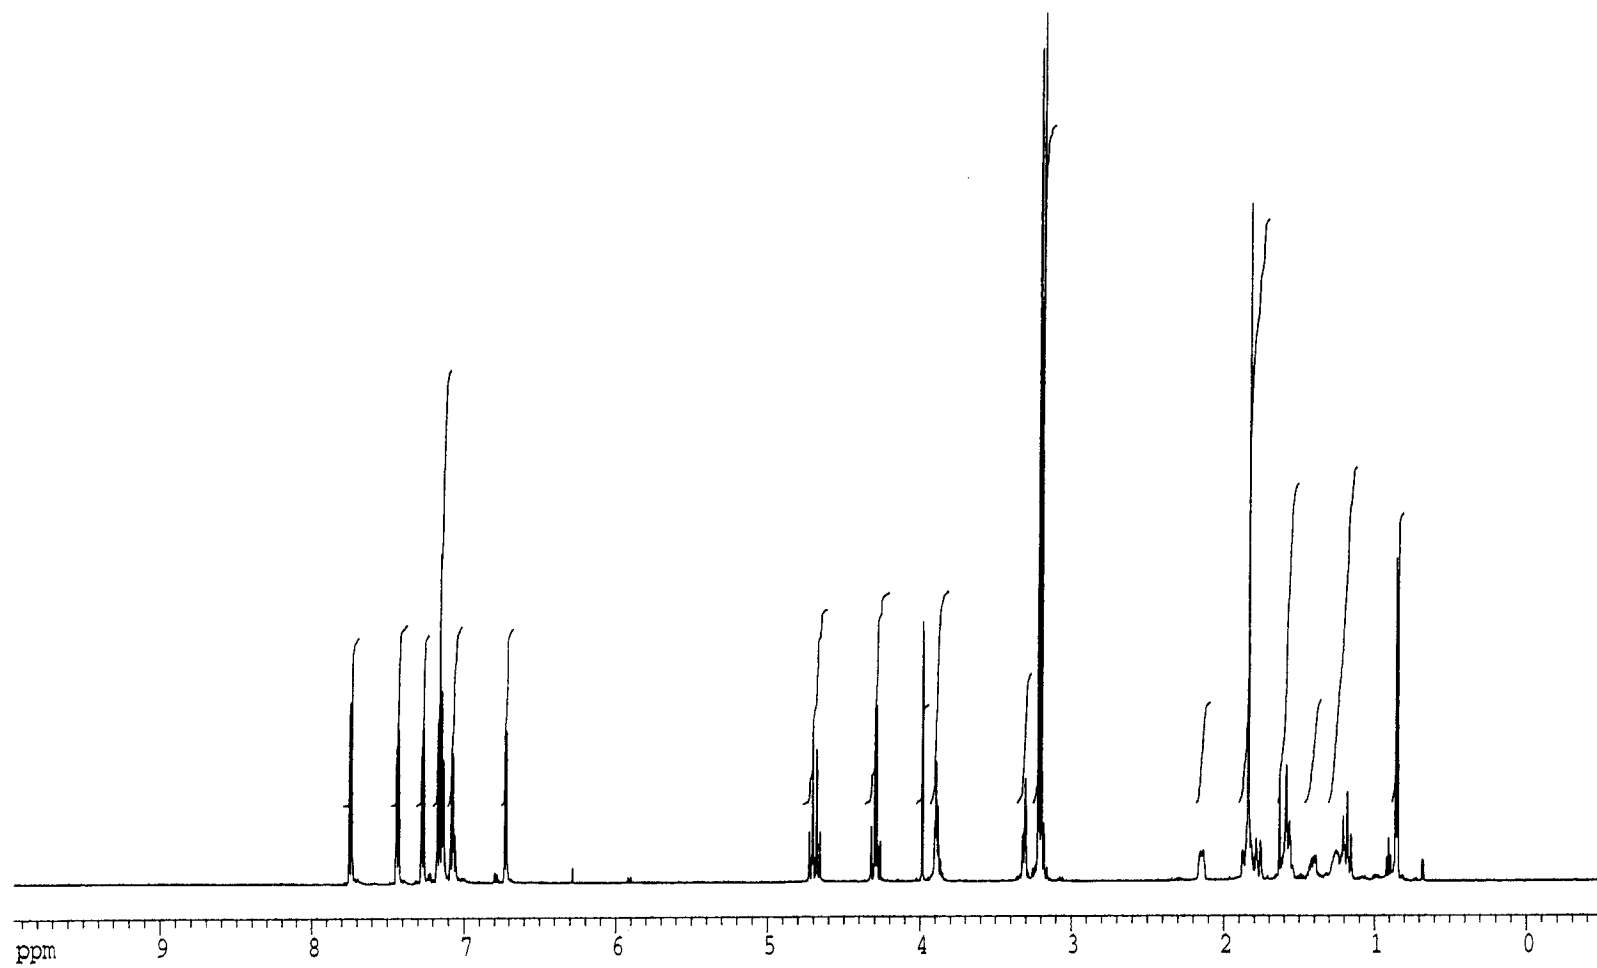

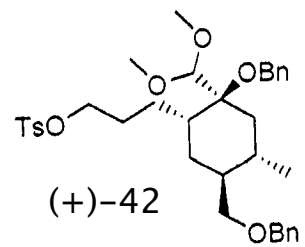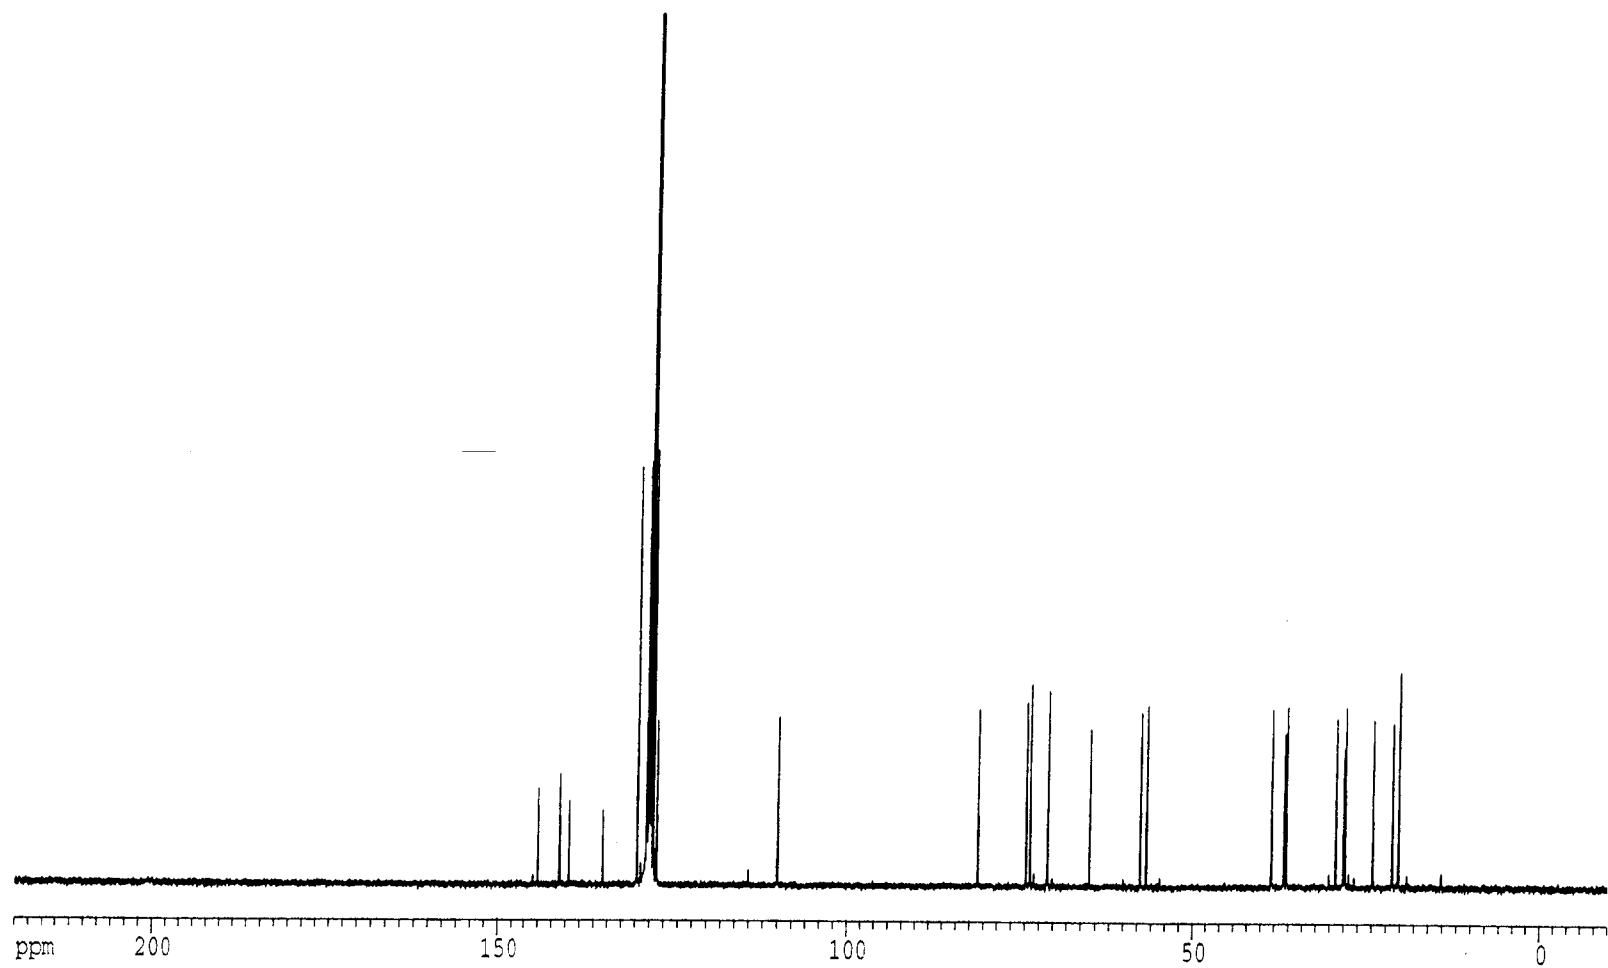

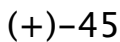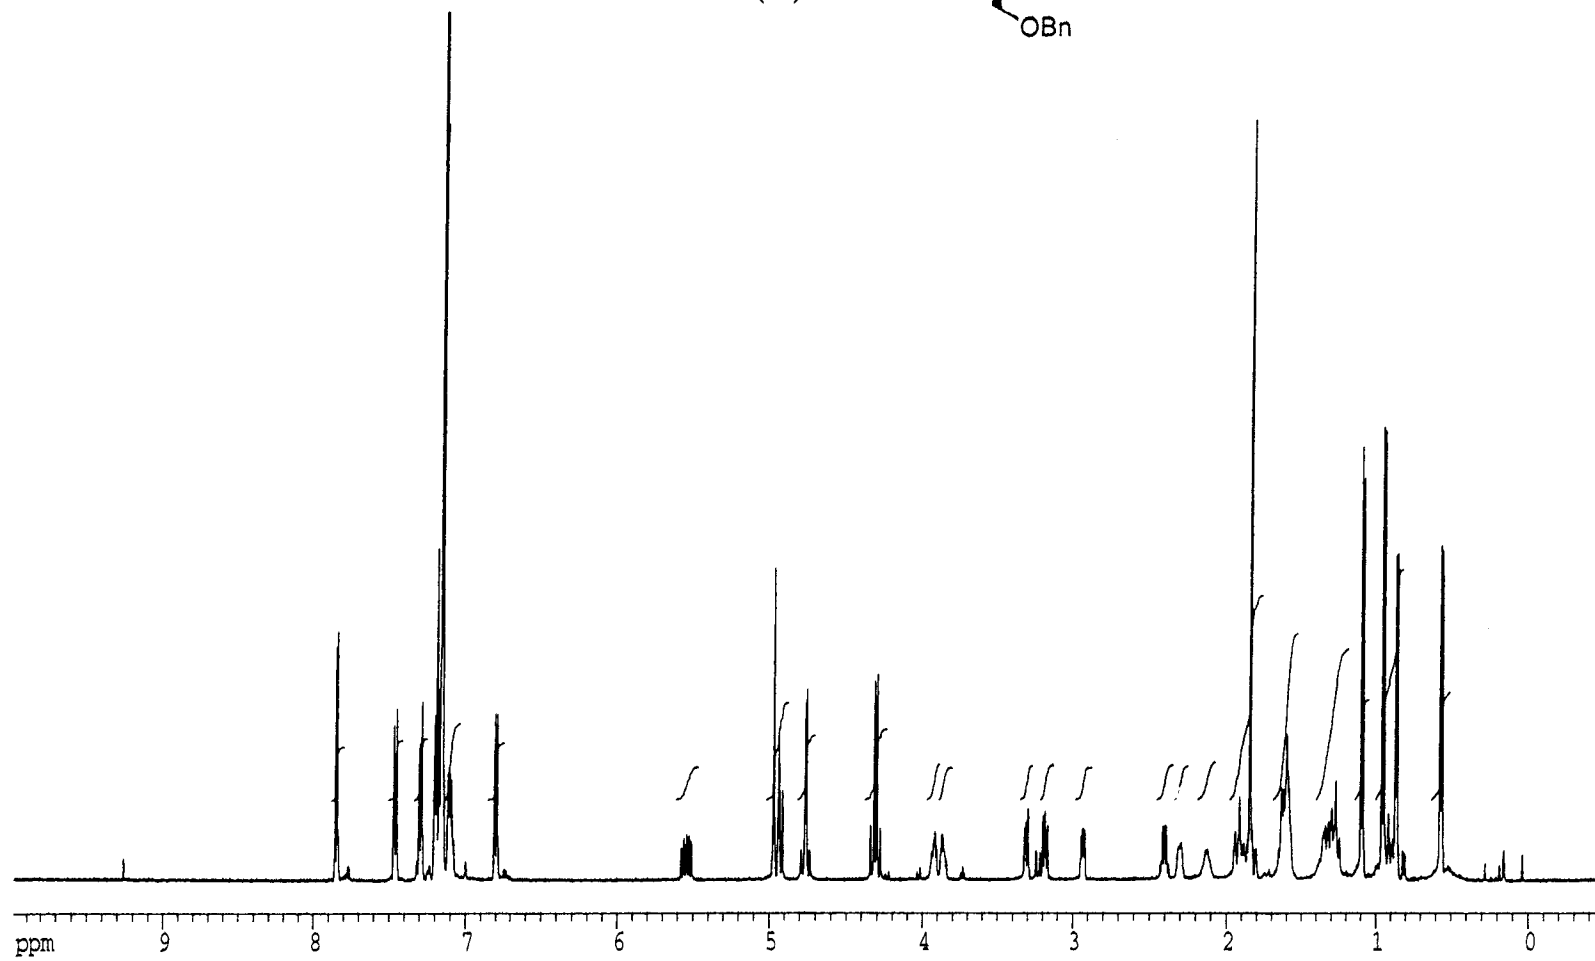

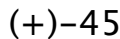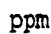

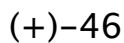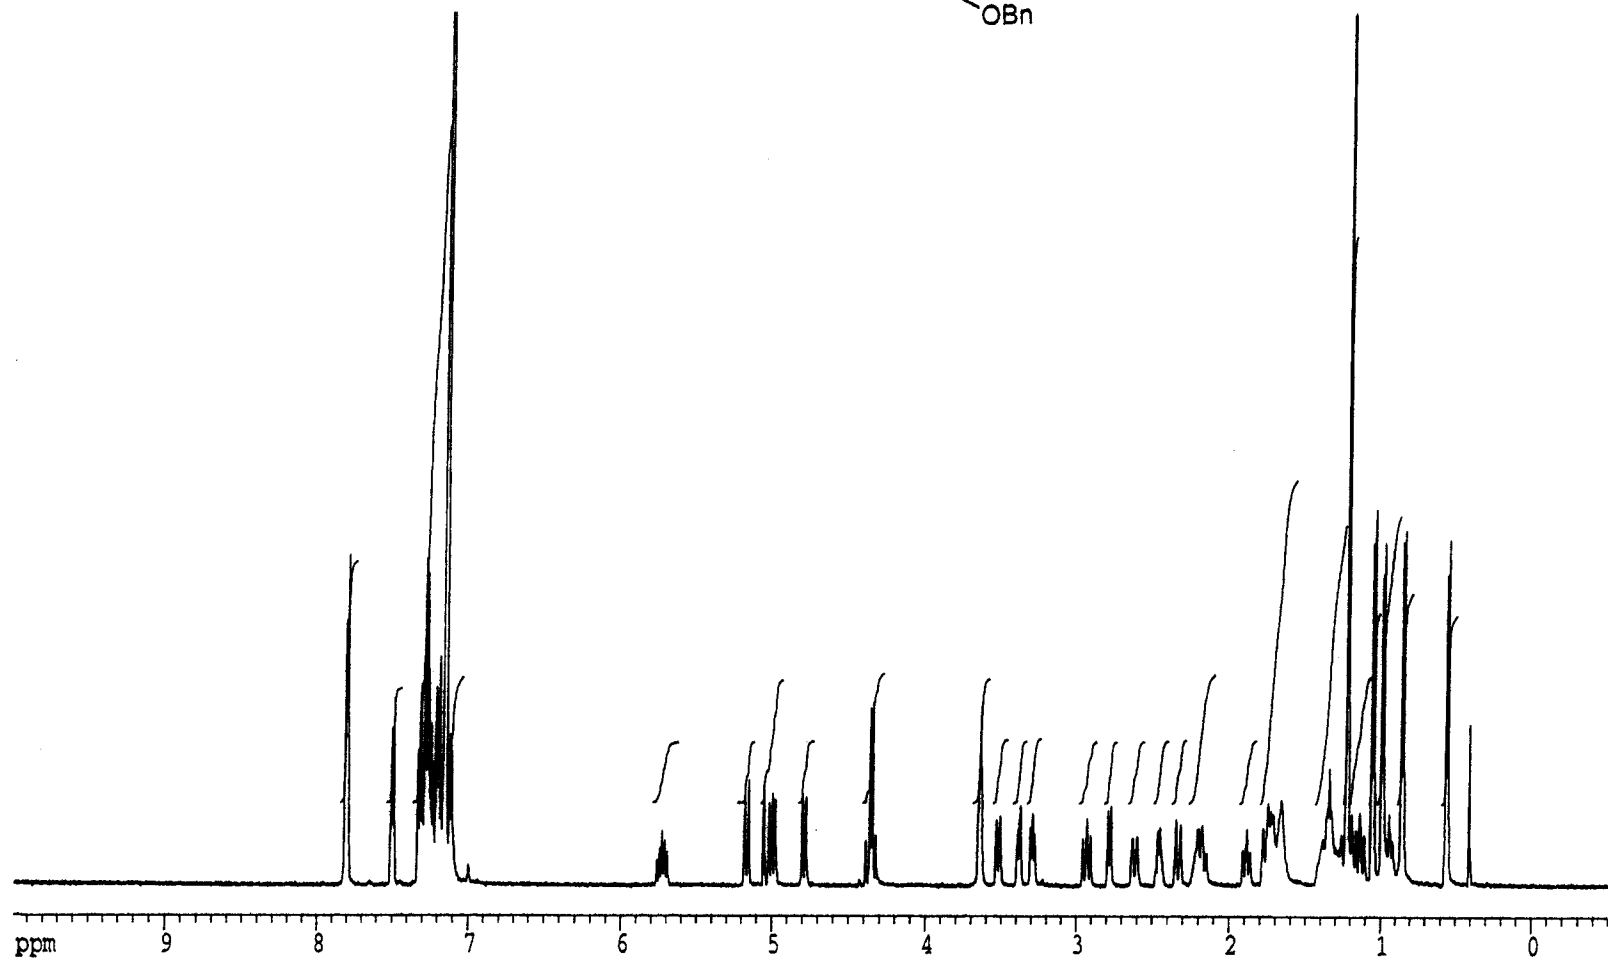

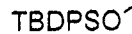

(+)-46

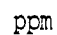

200

150

100

50

0

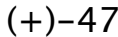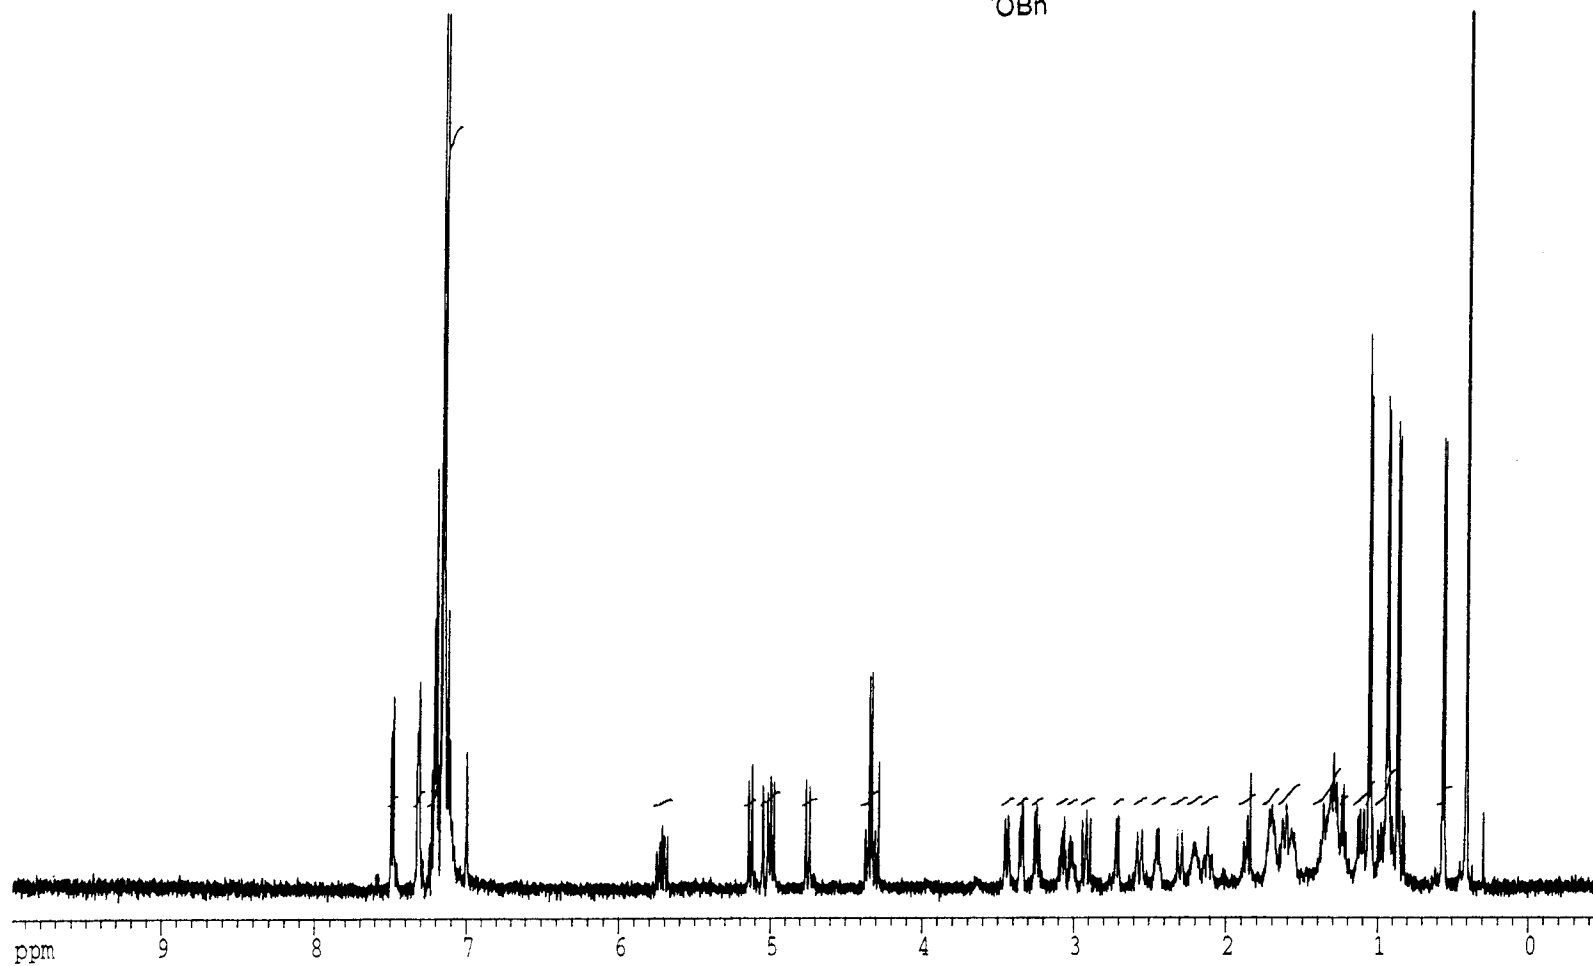

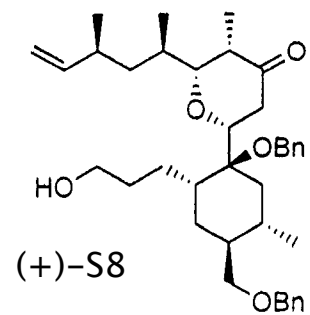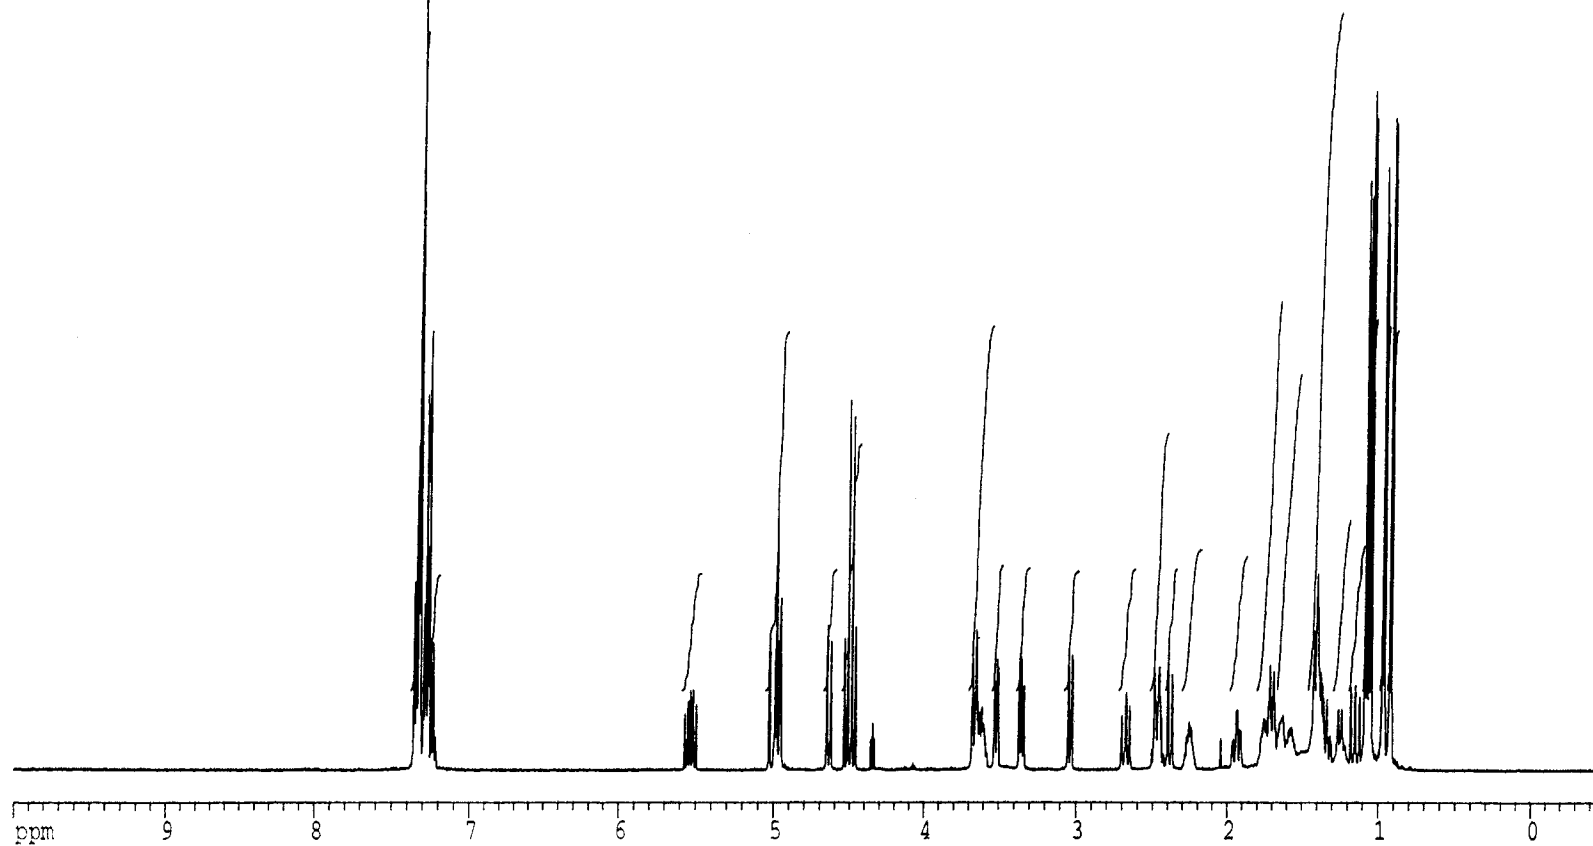

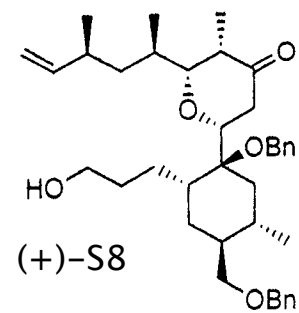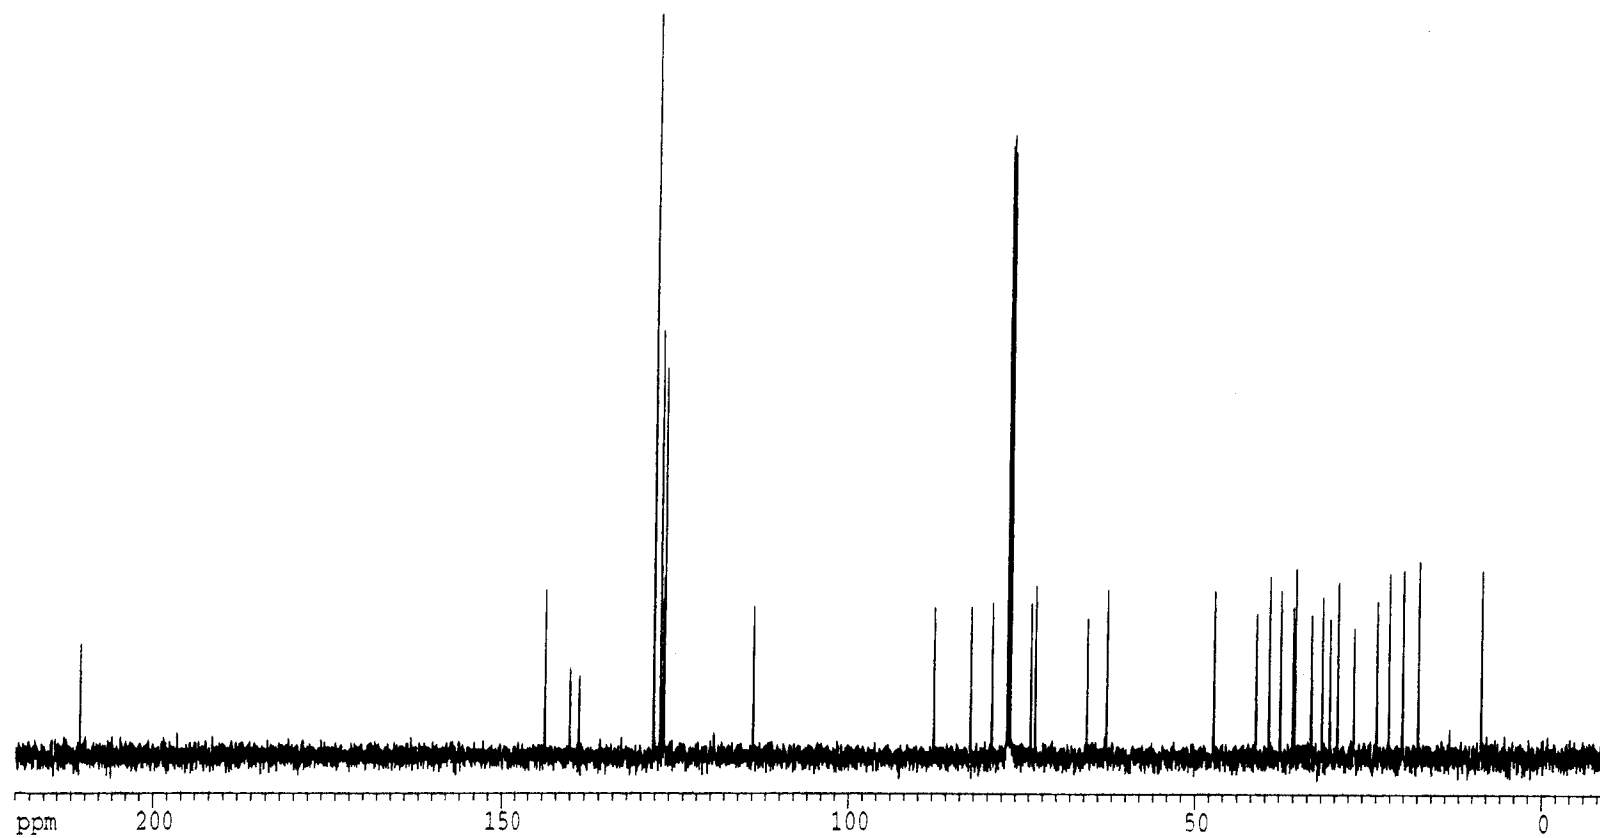

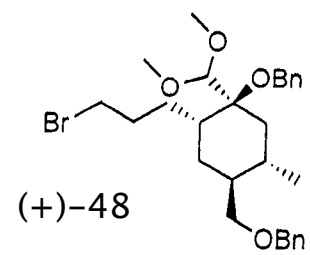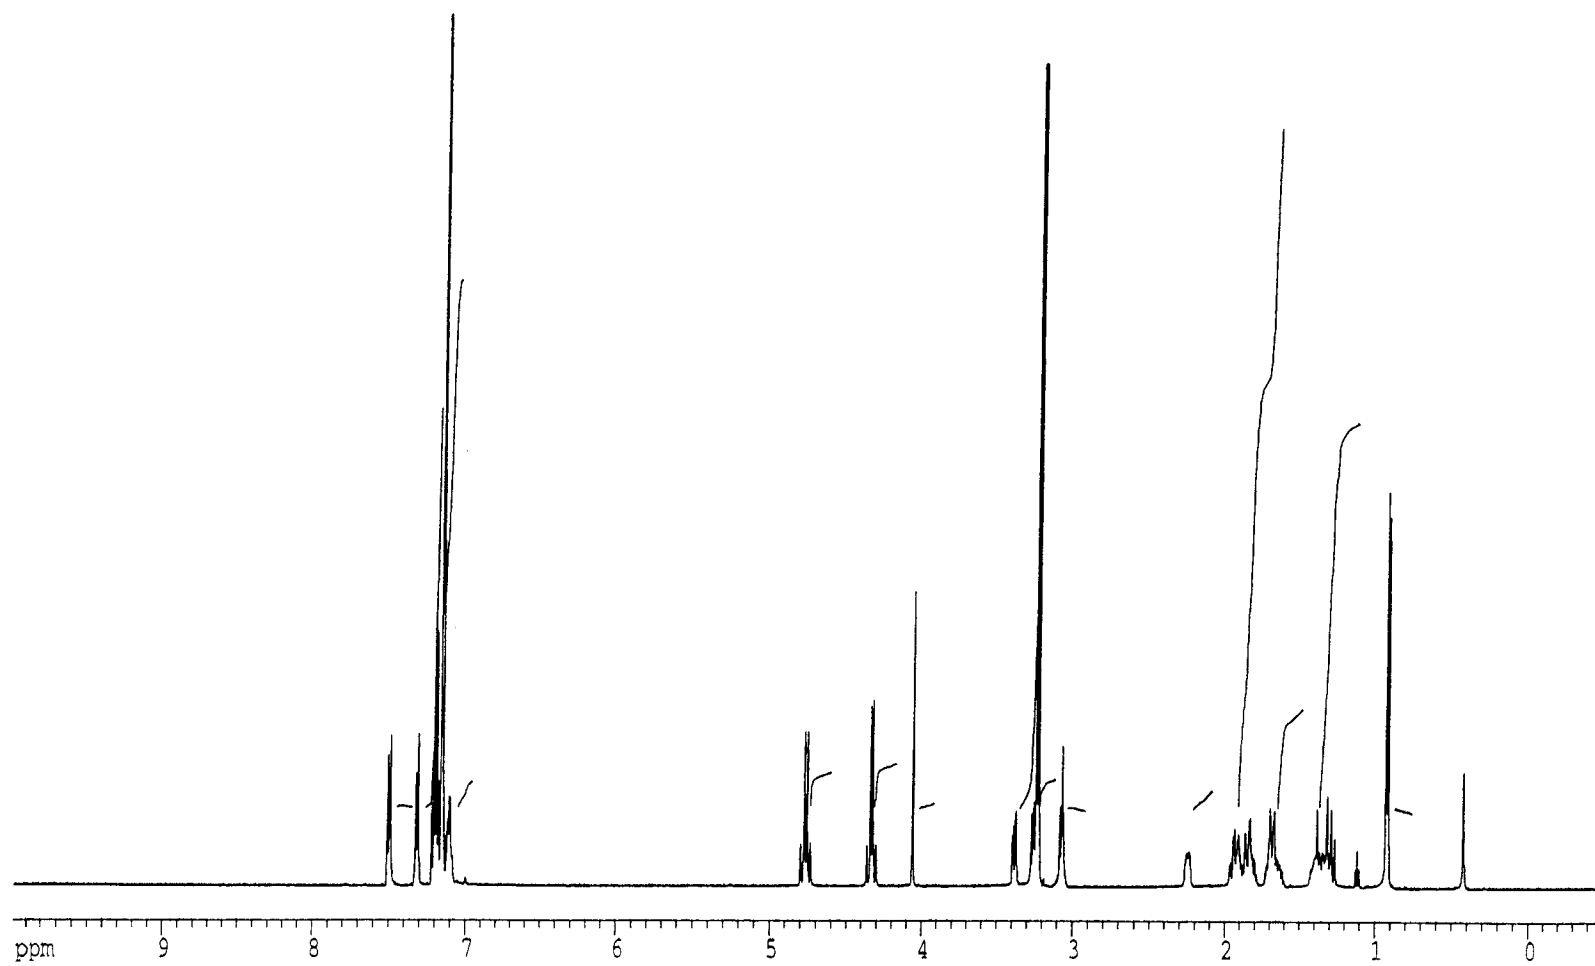

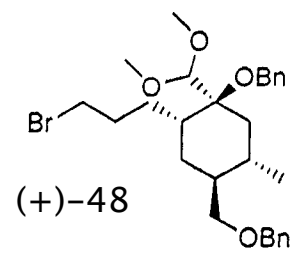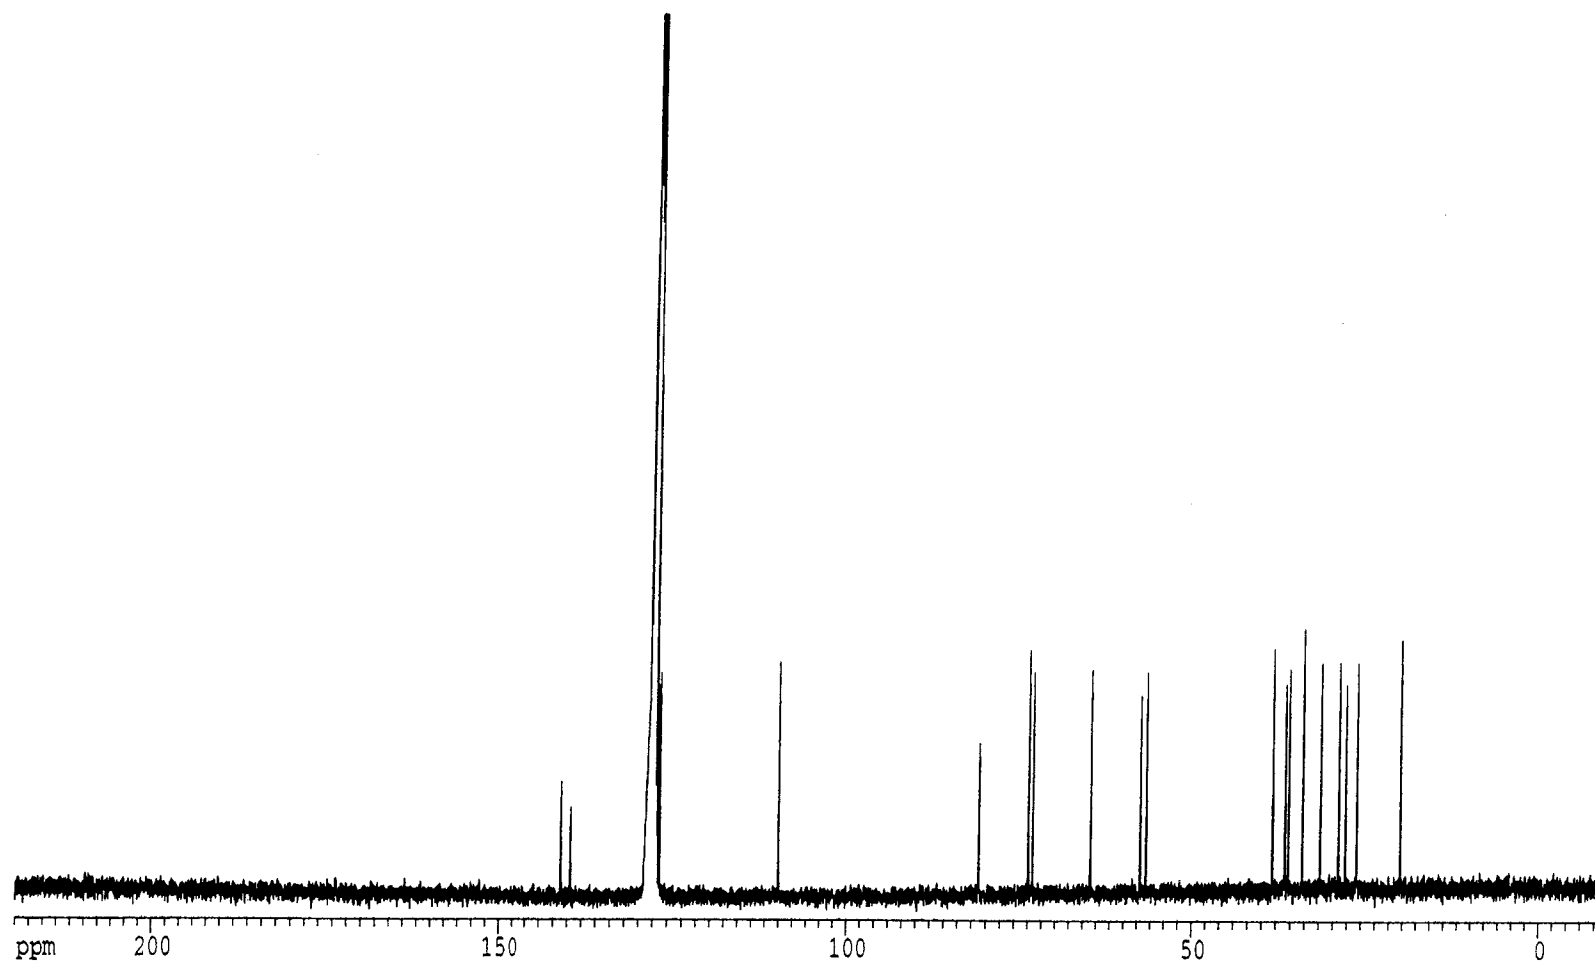

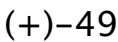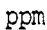

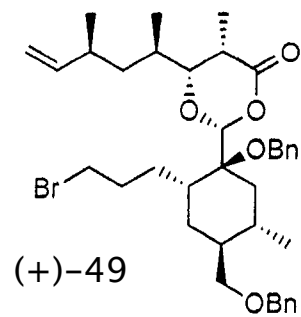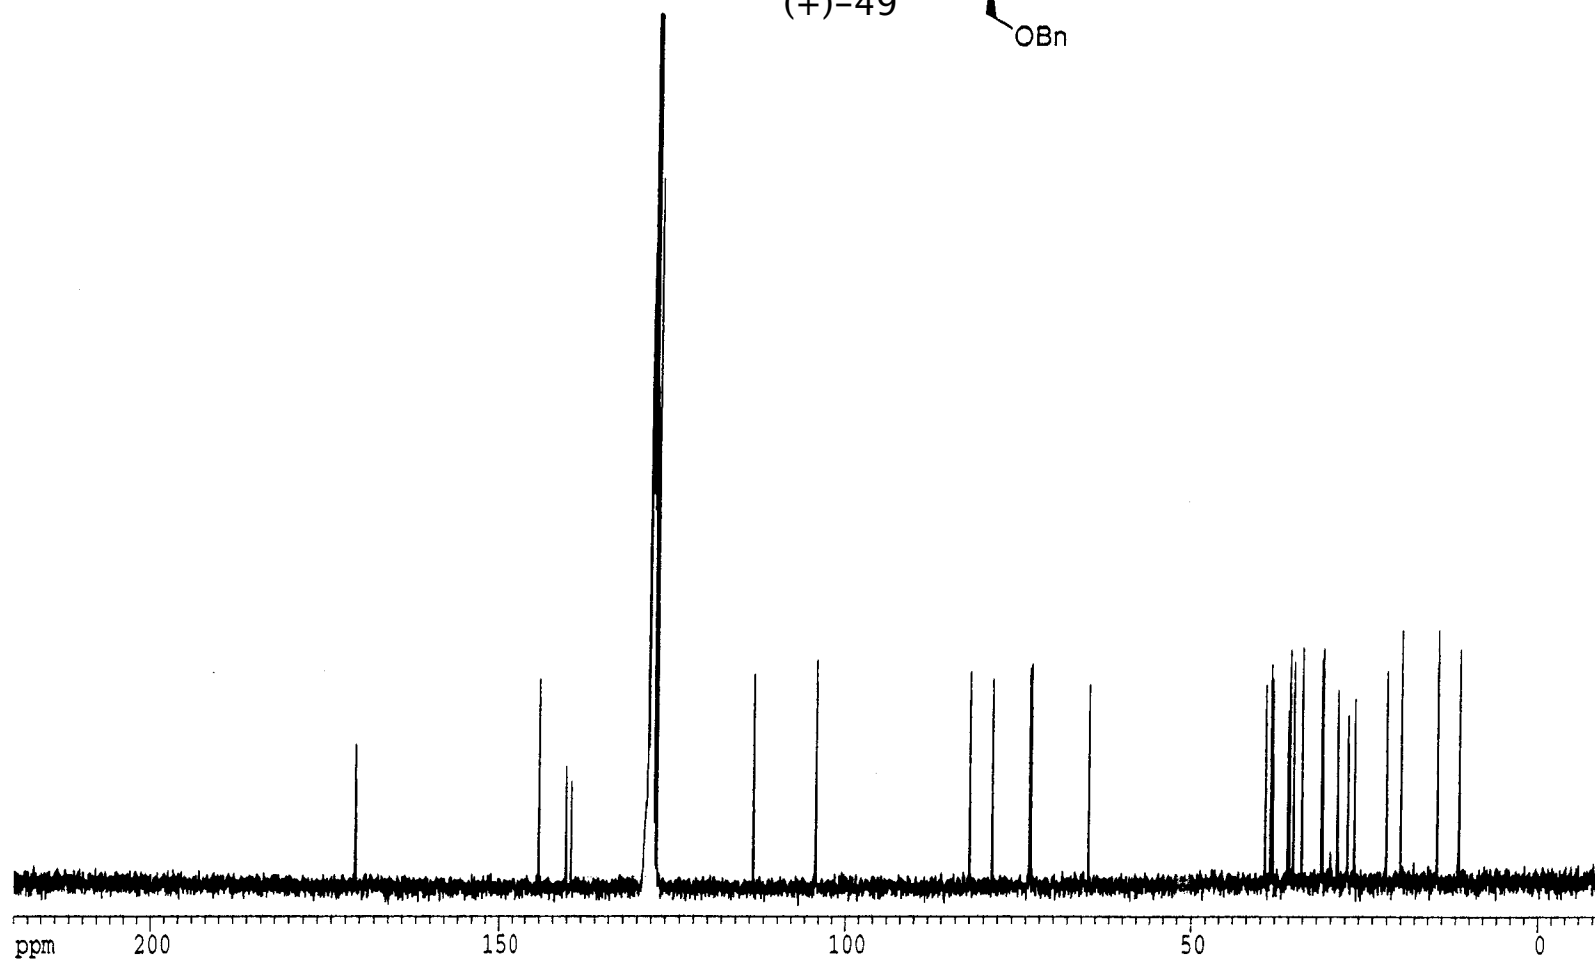

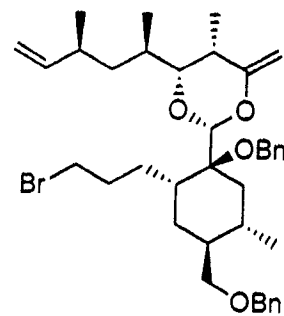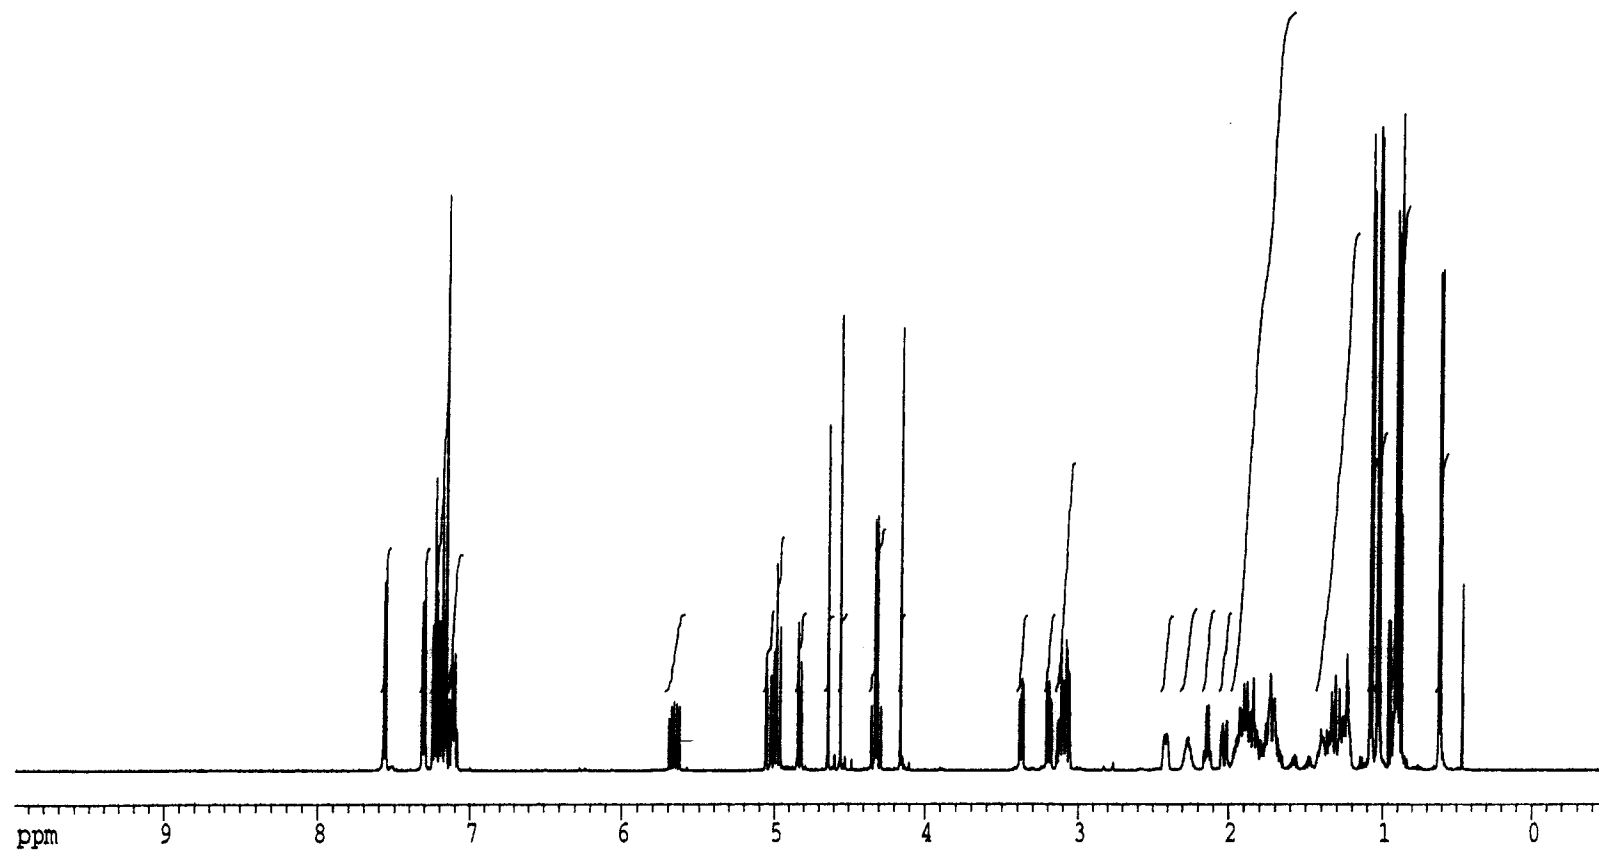

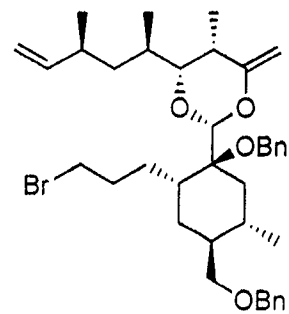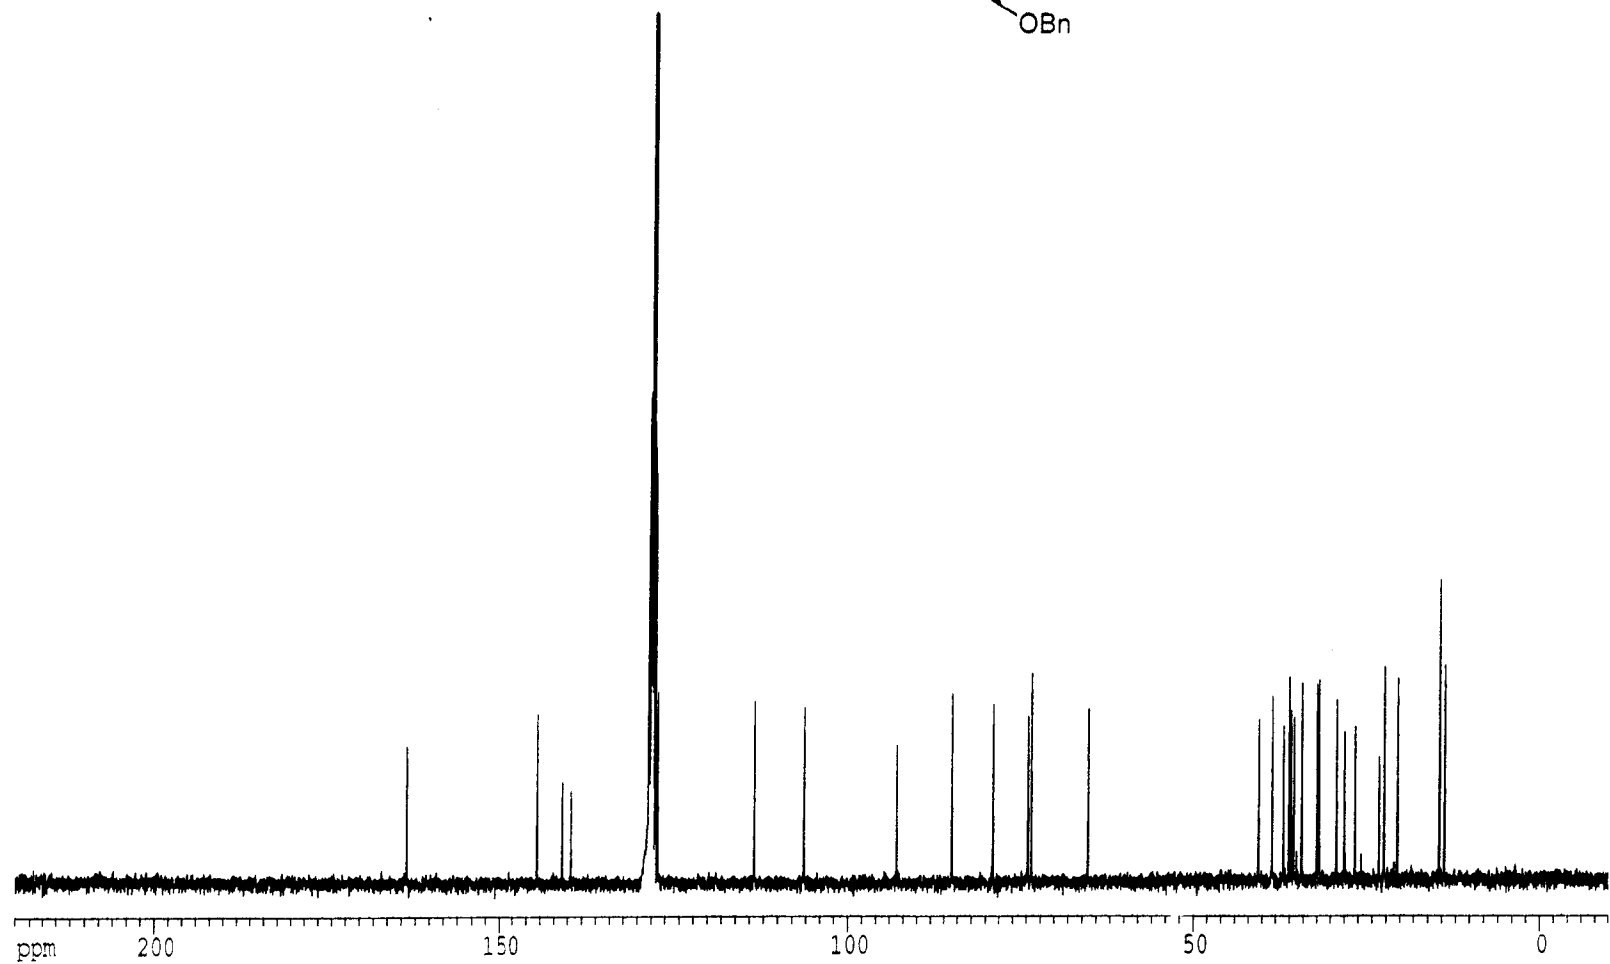

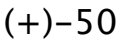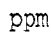

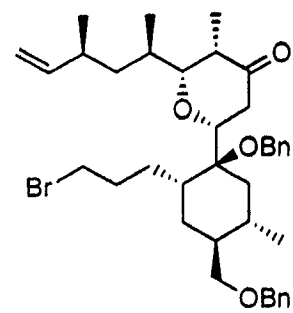

(+)-50

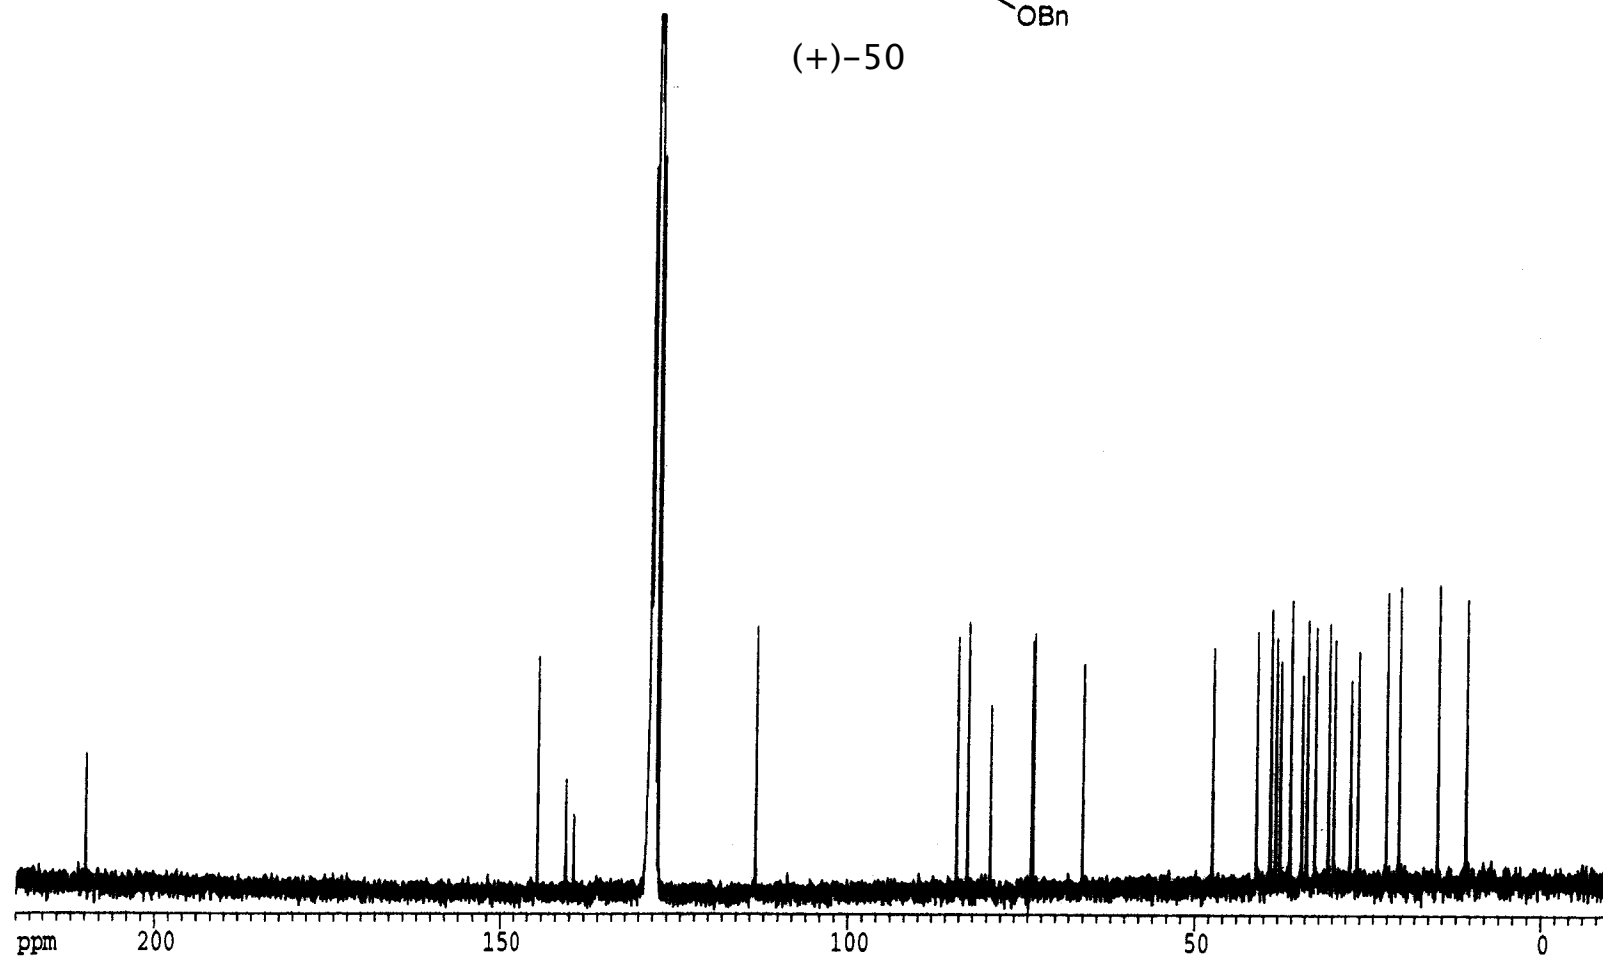

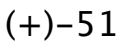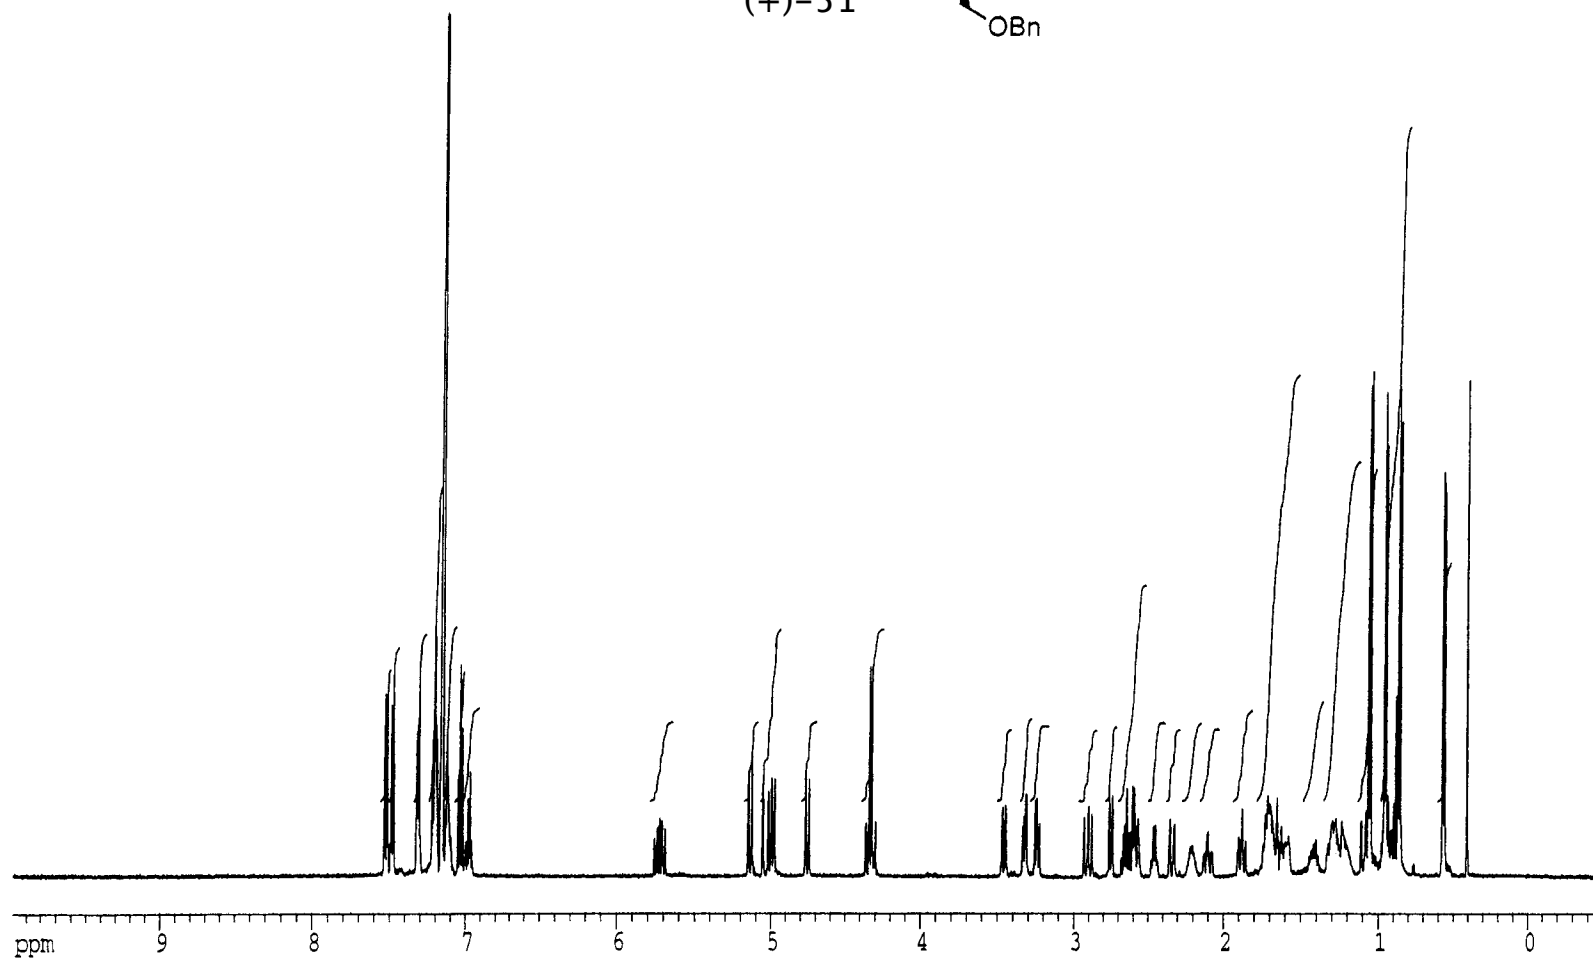

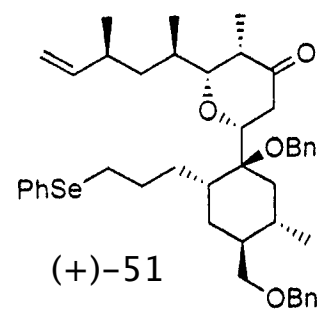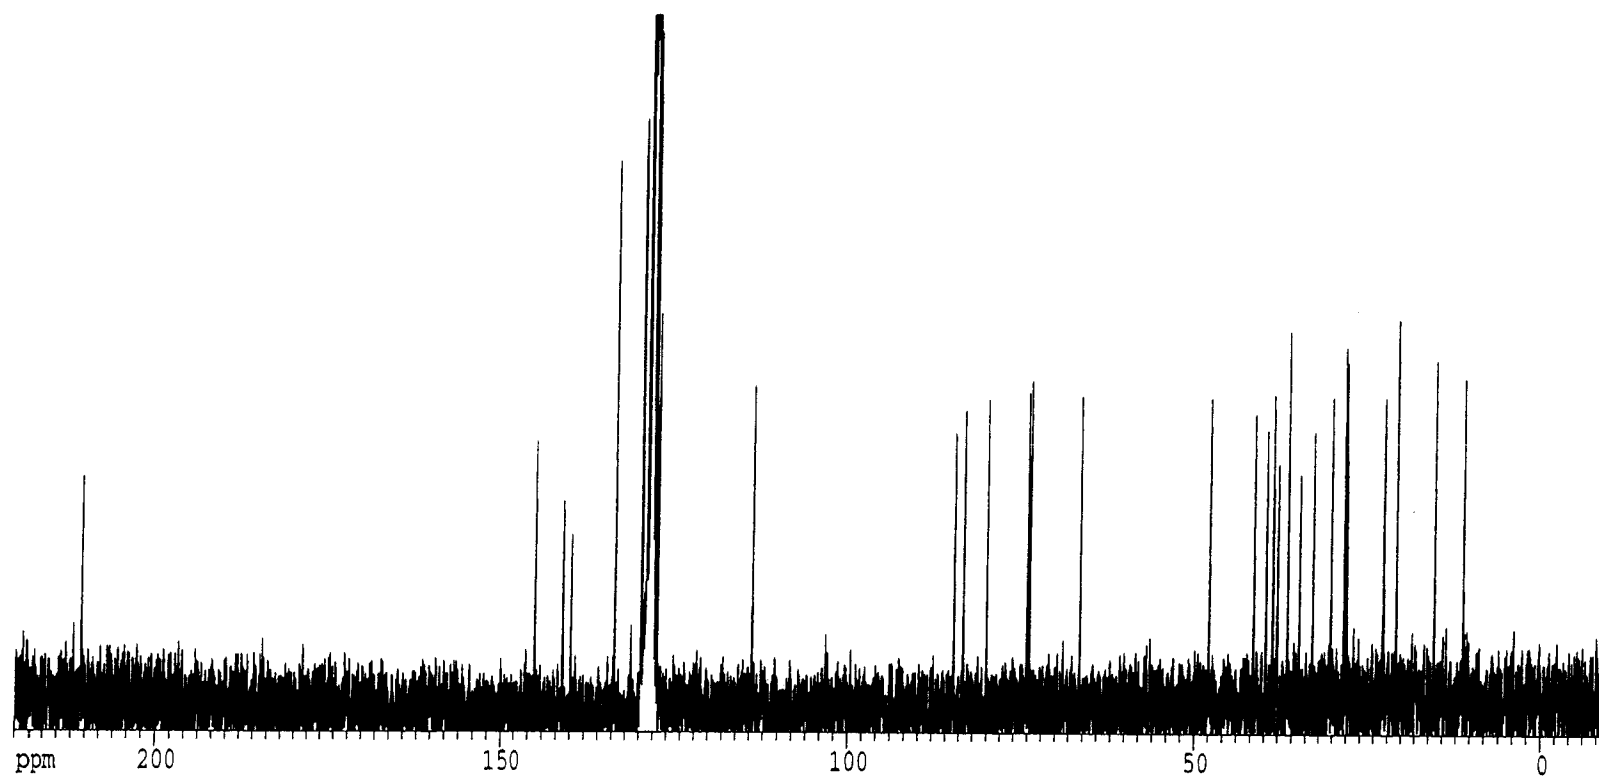

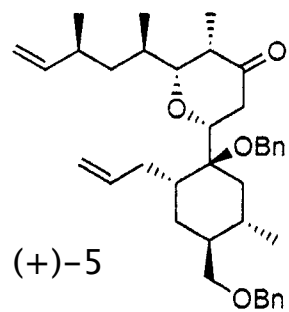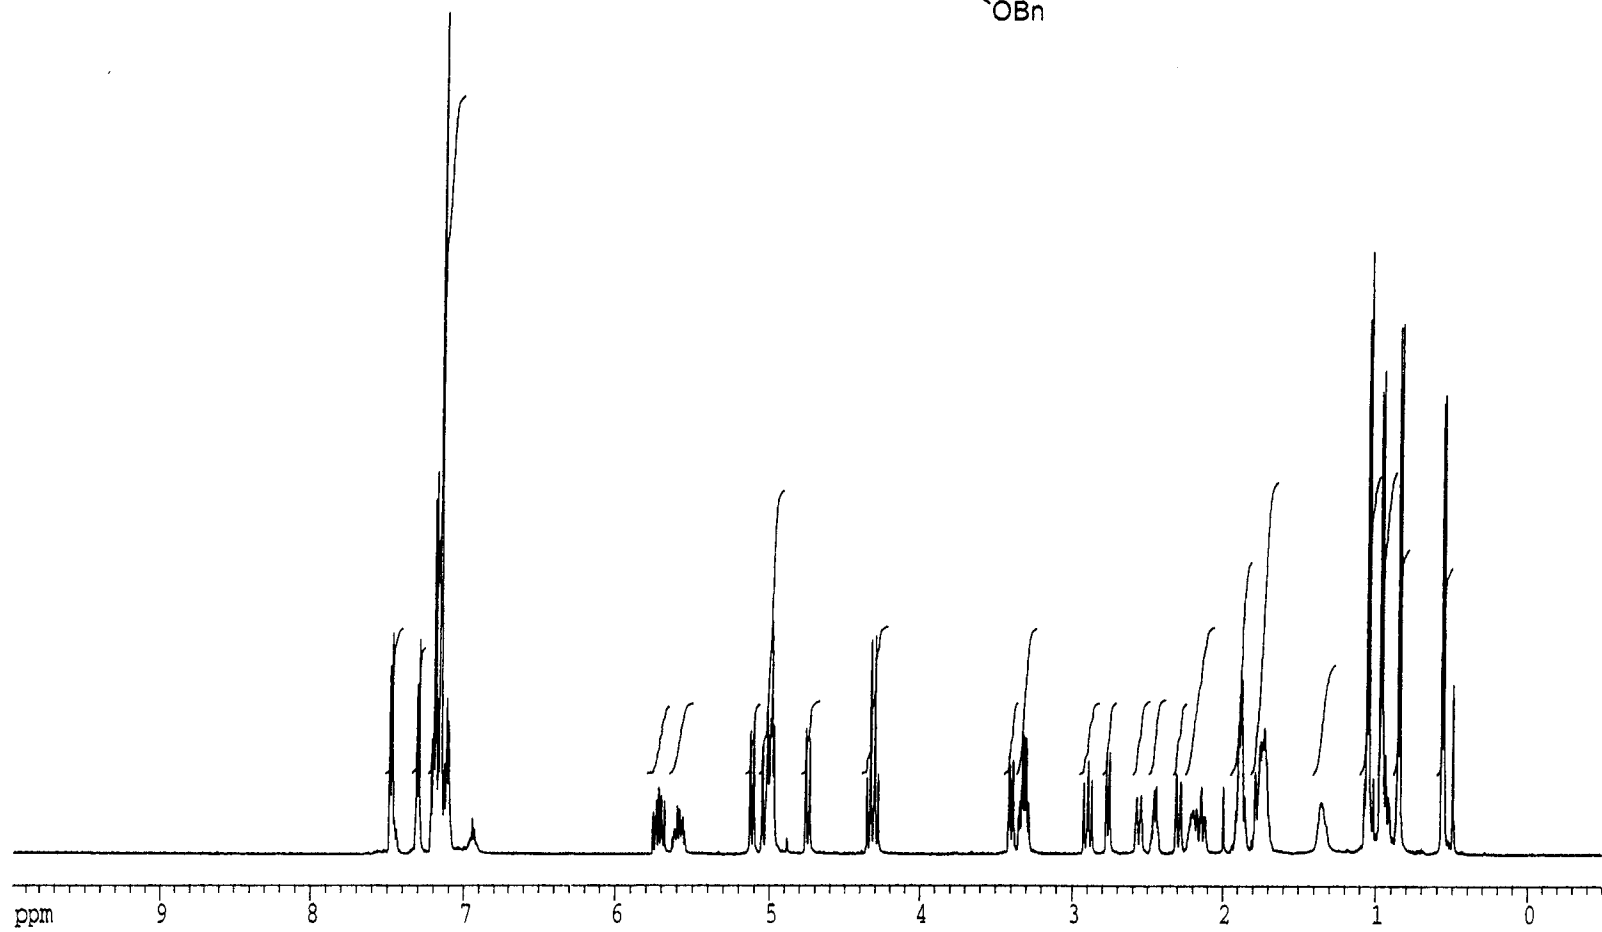

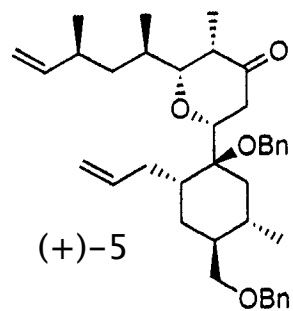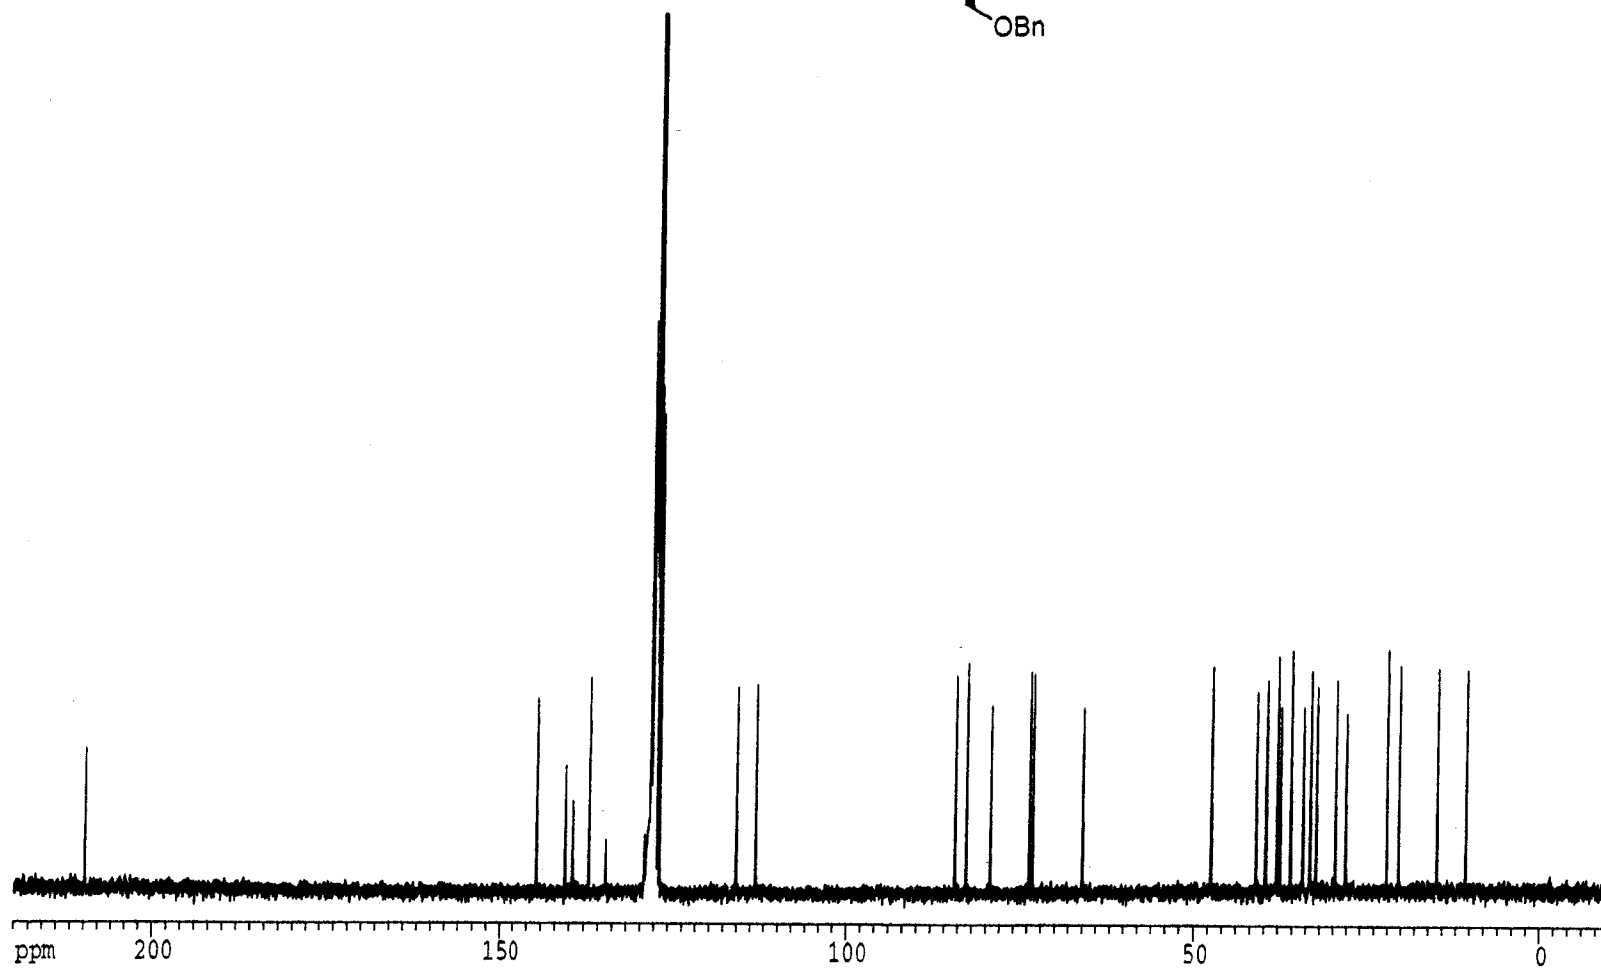

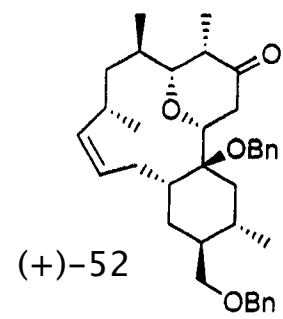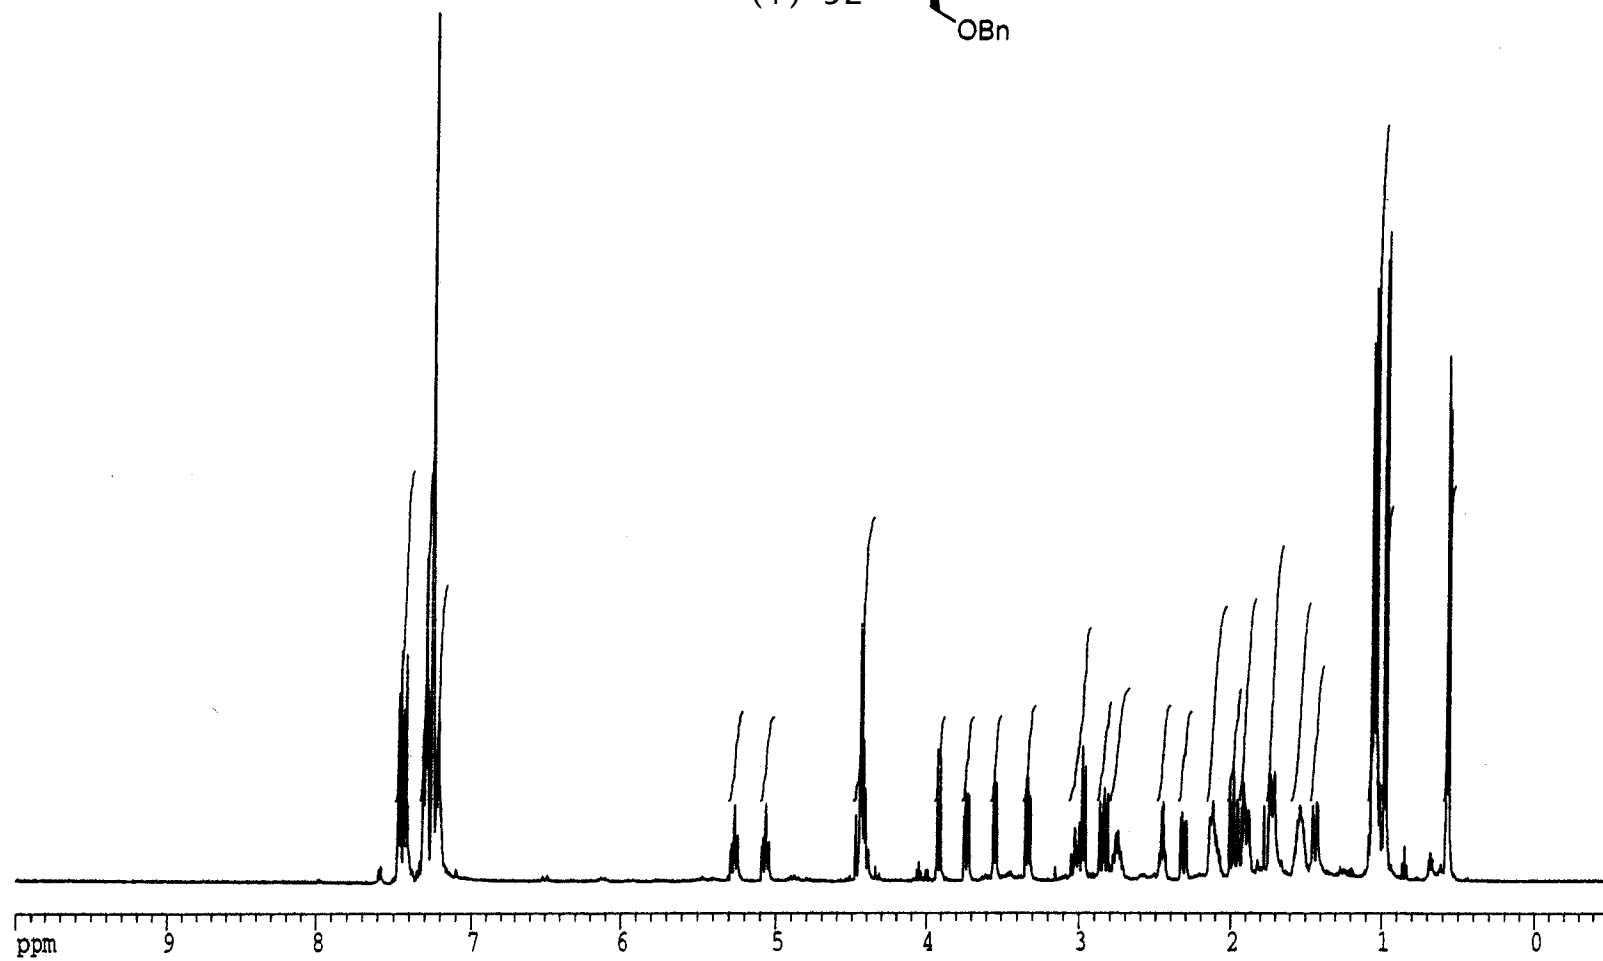

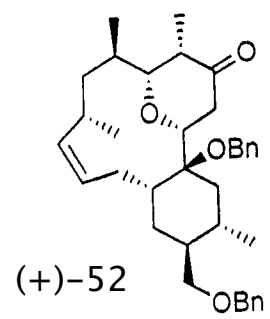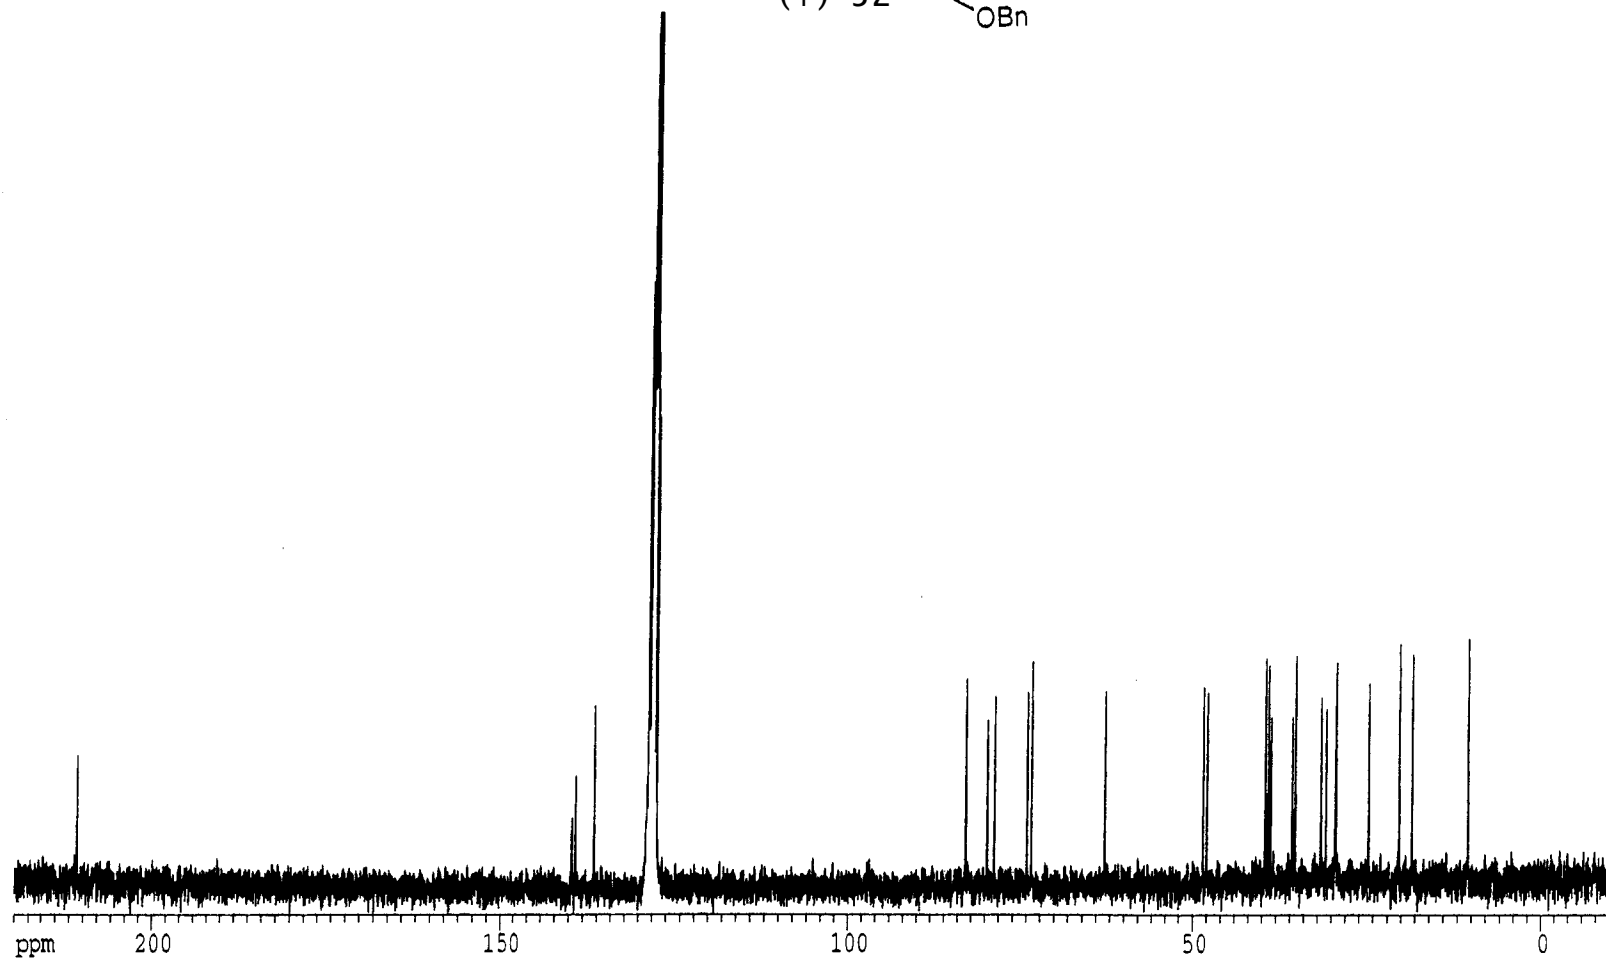

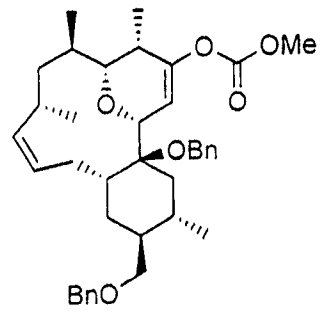

(+)-53

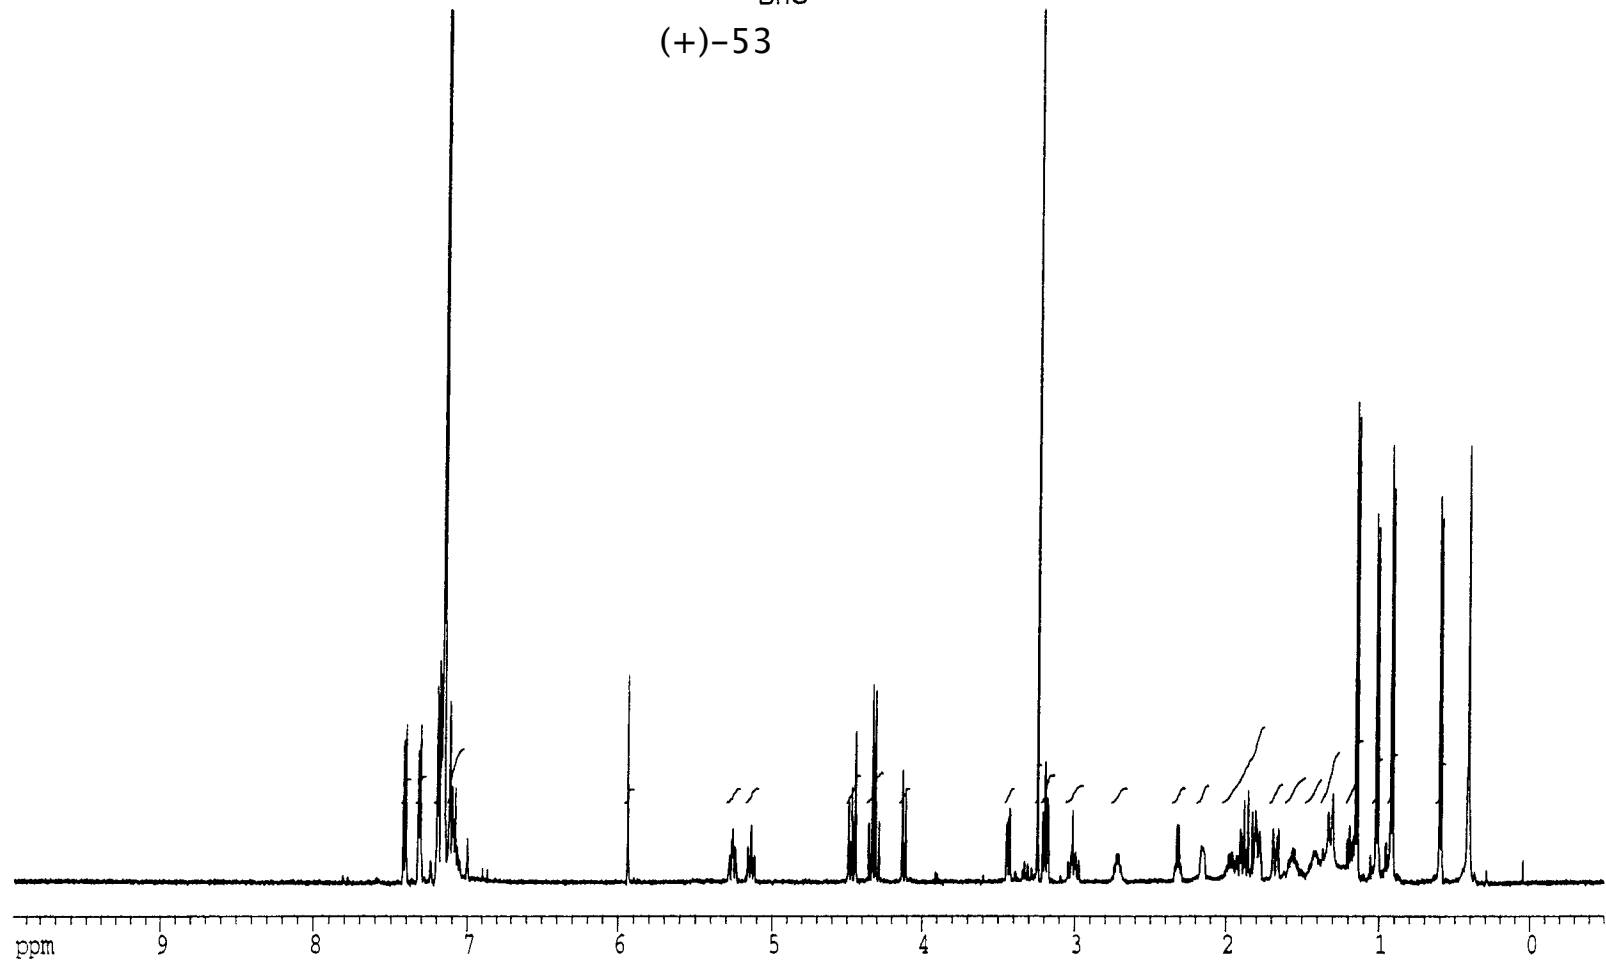

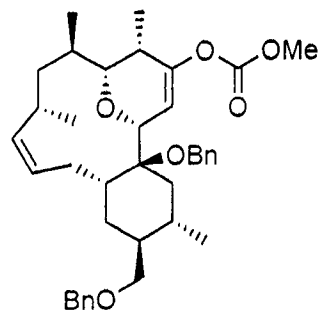

(+)-53

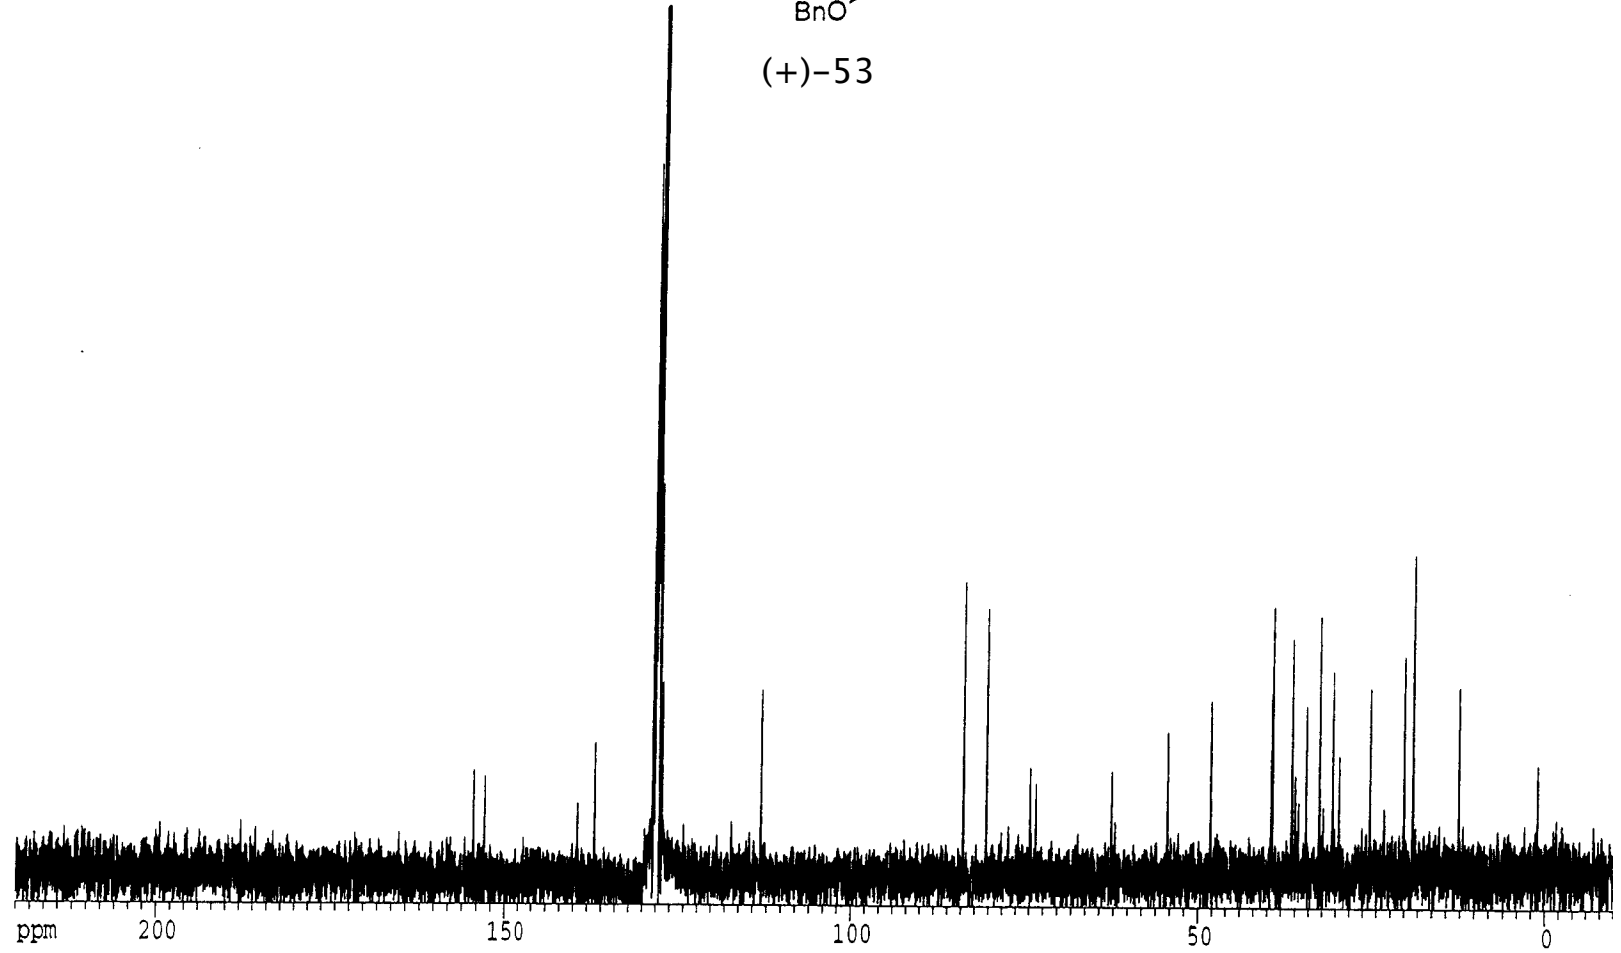

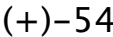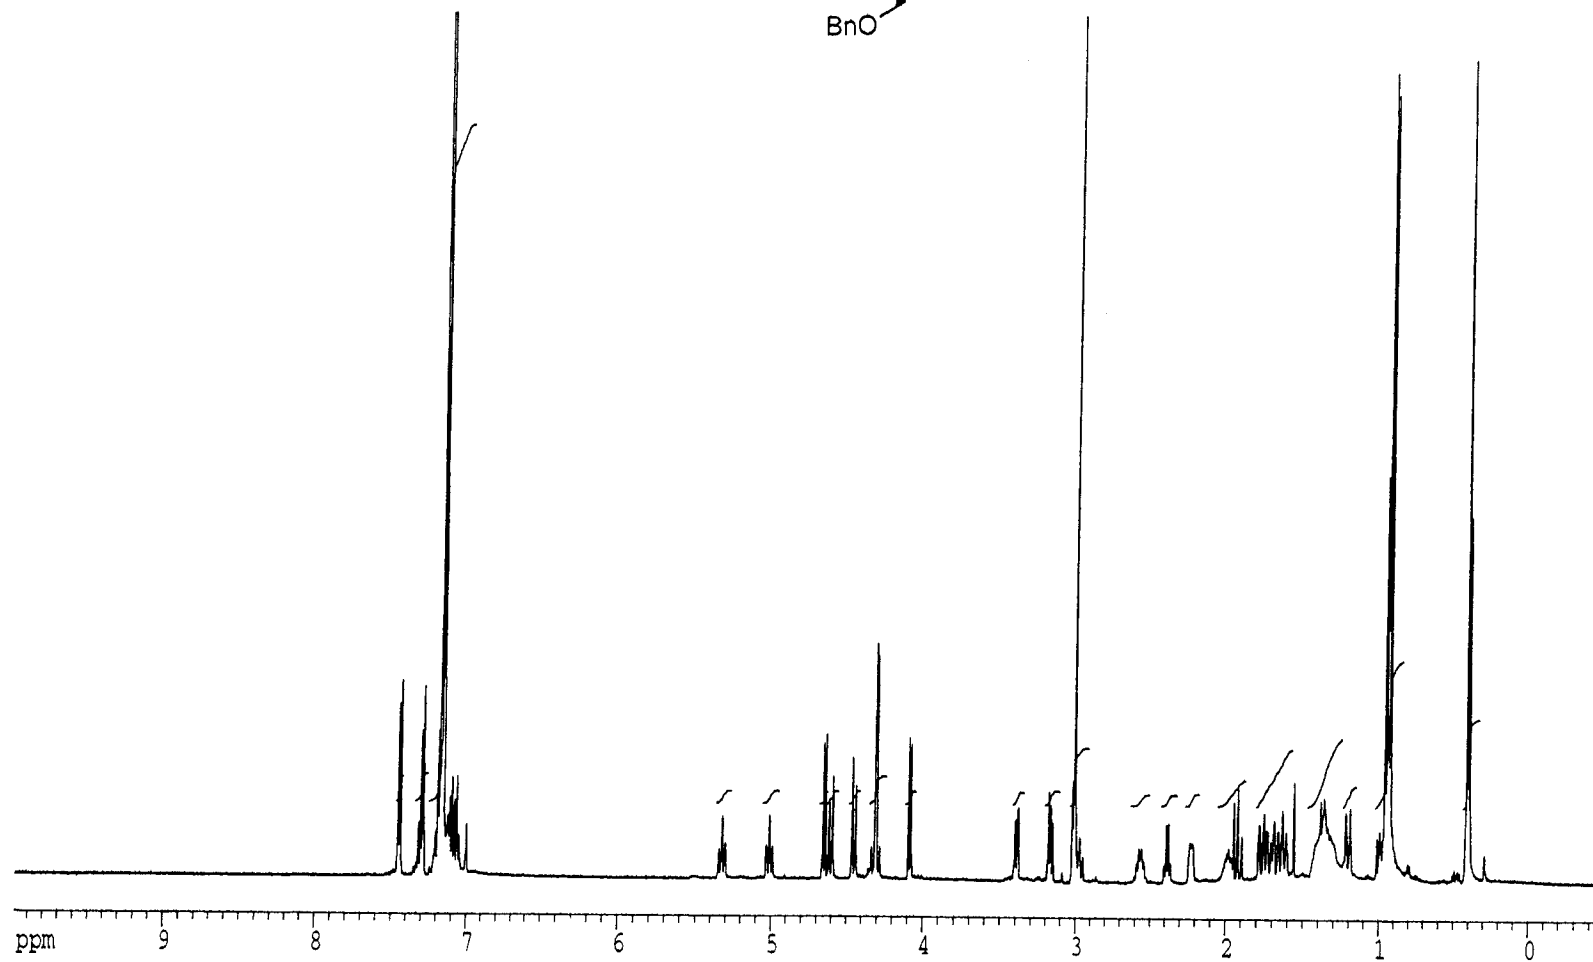

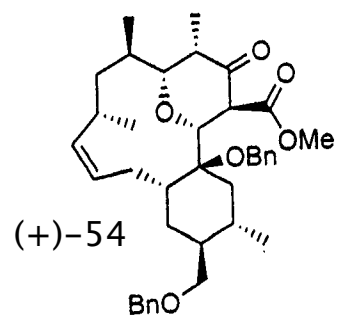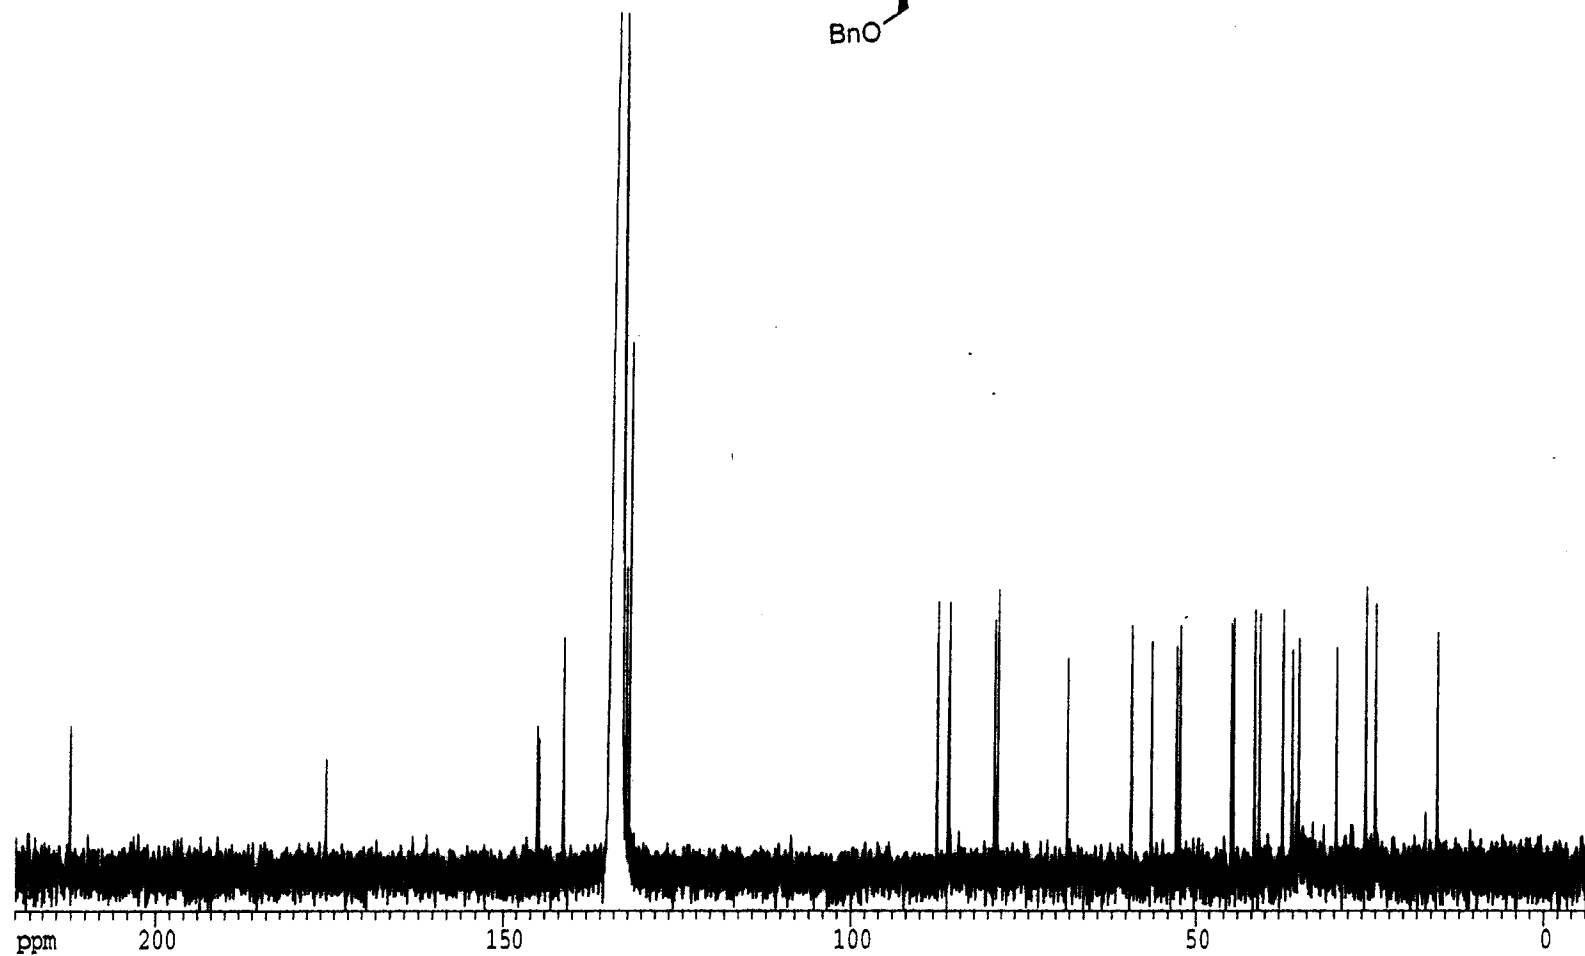

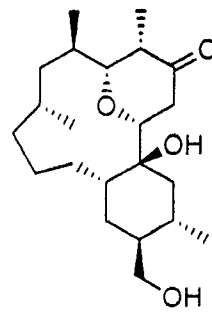

(+)-S9

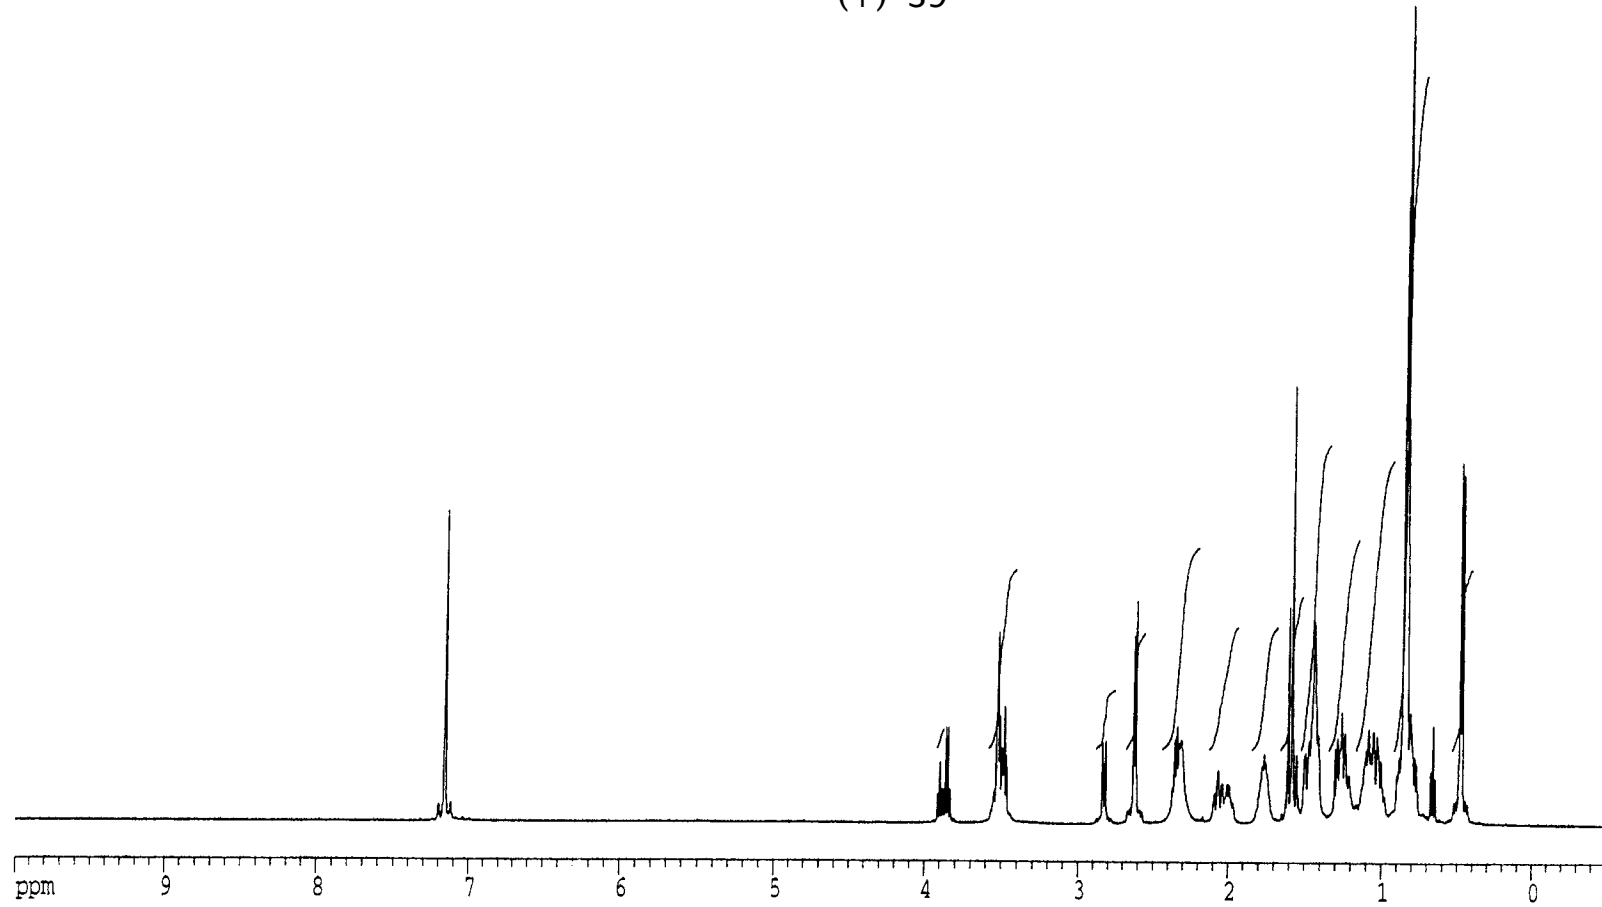

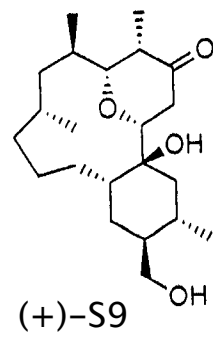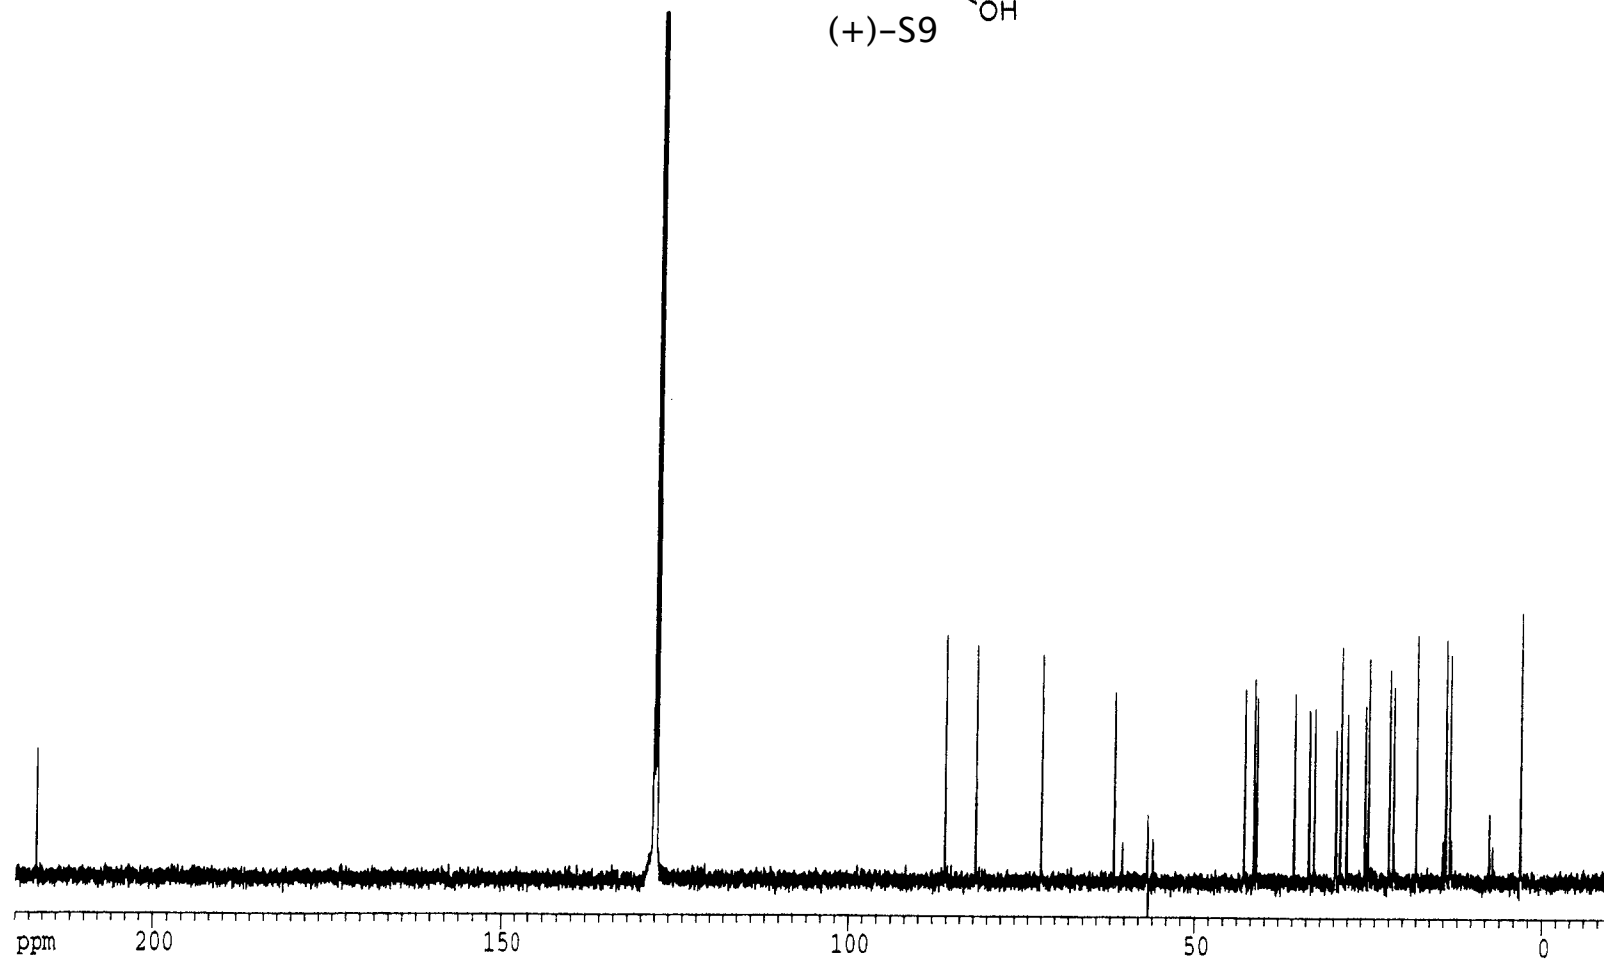

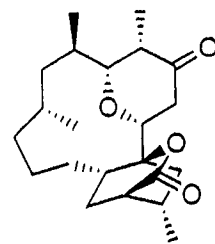

(+)-55

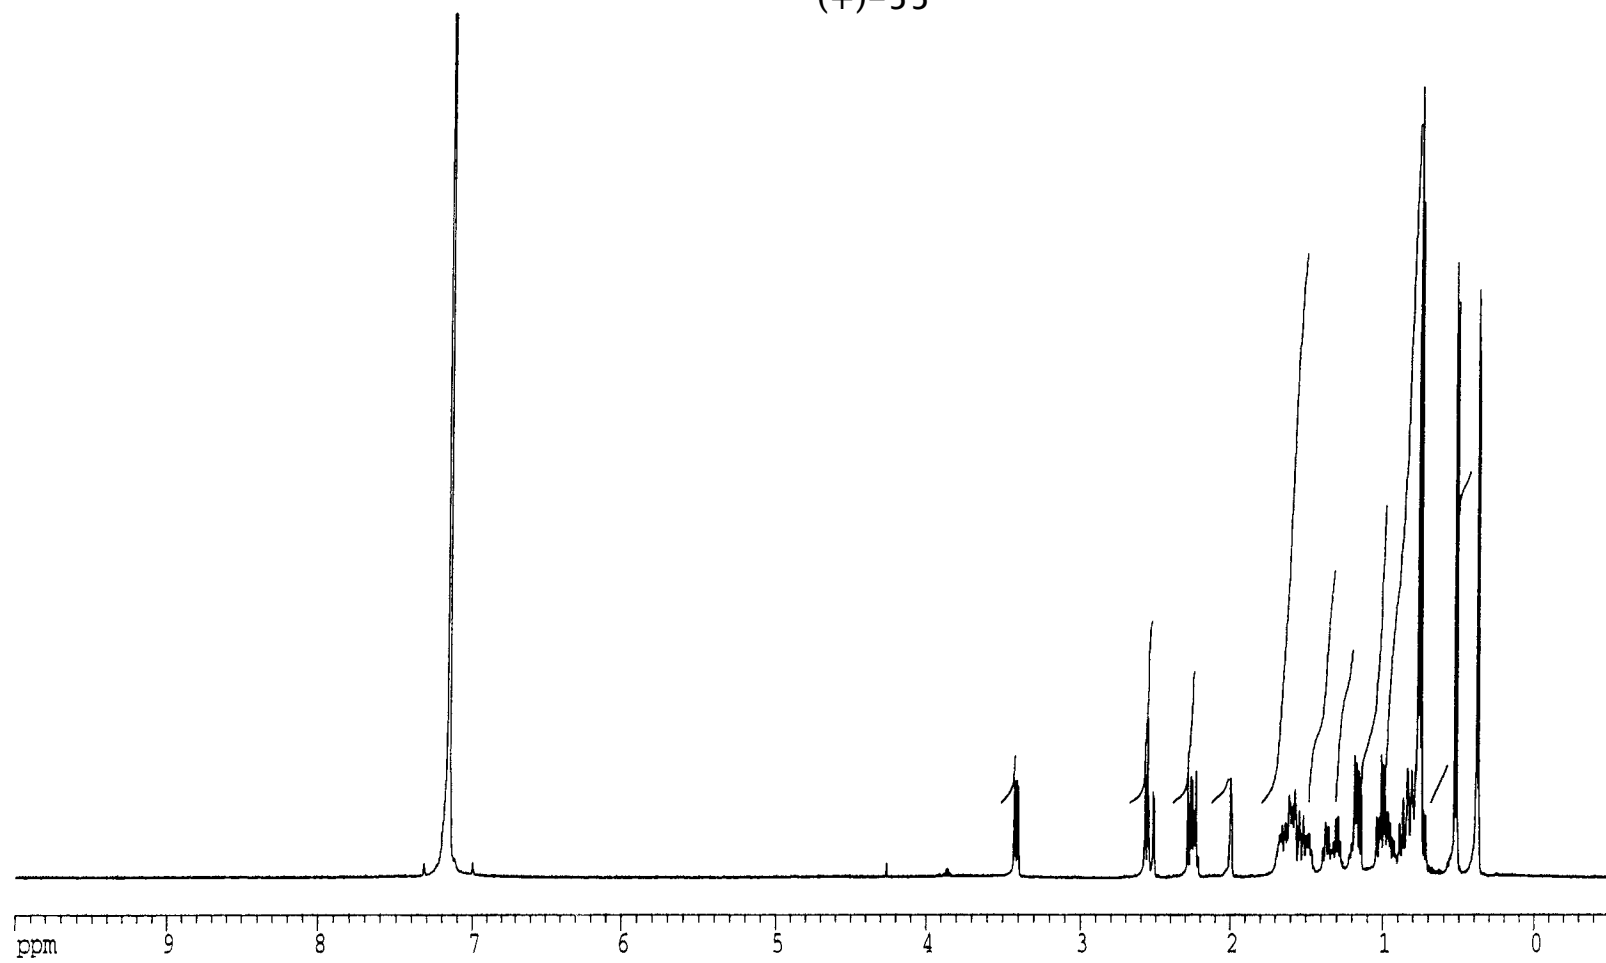

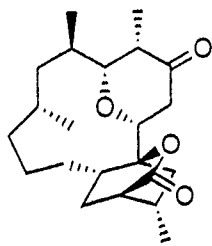

(+)-55

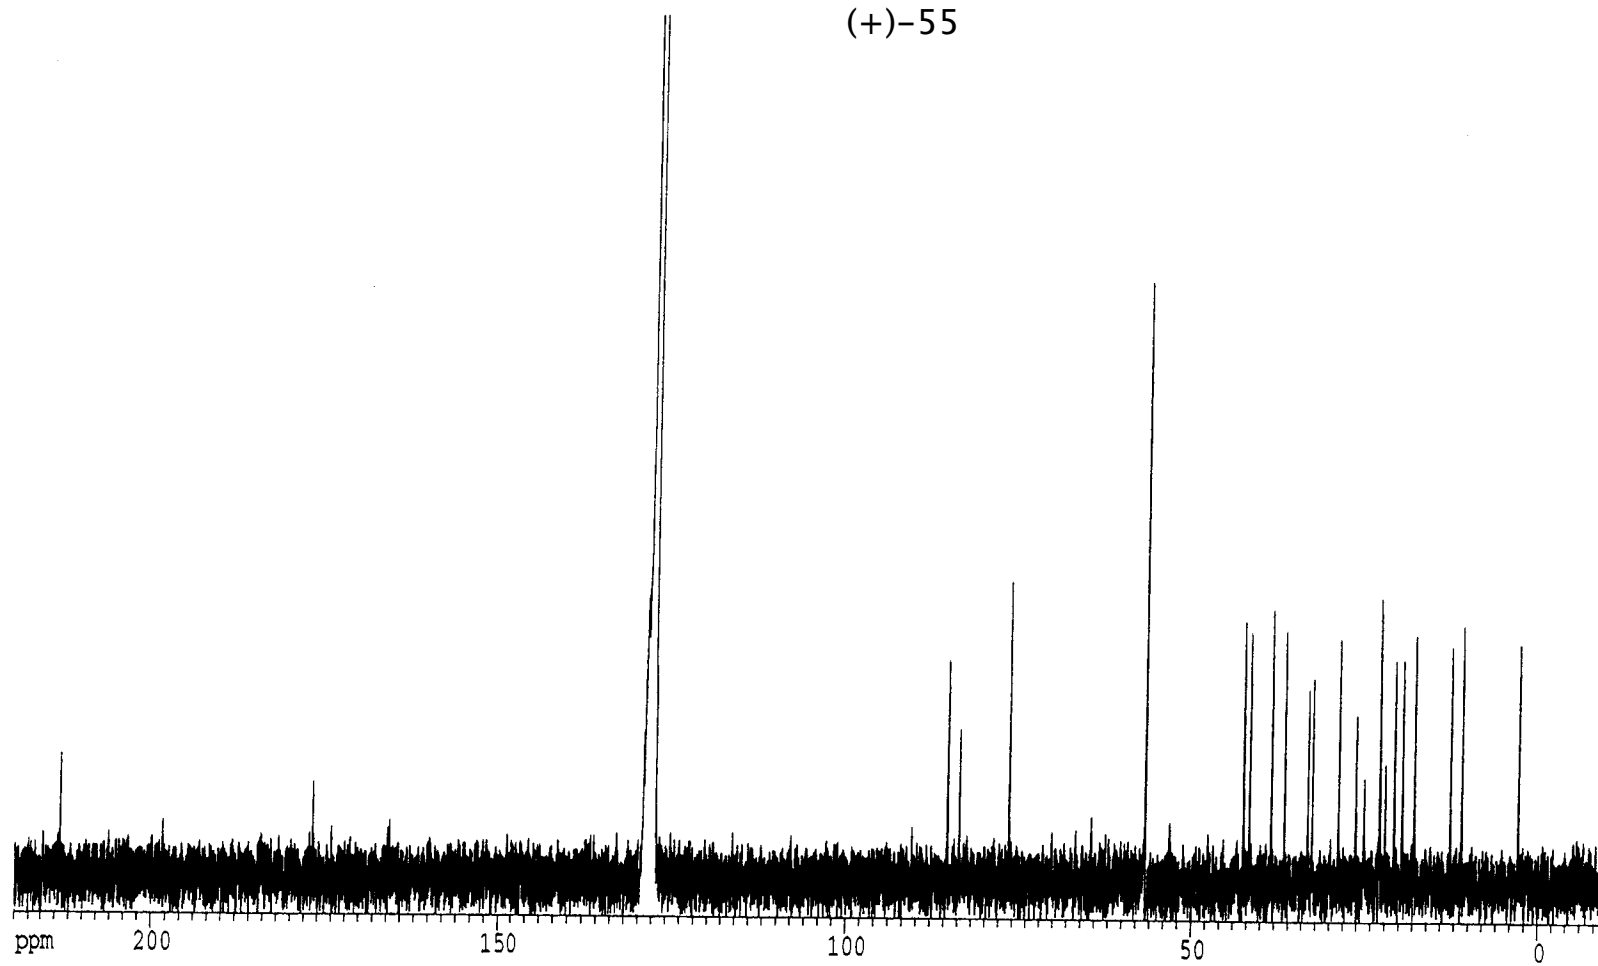

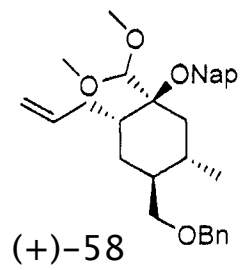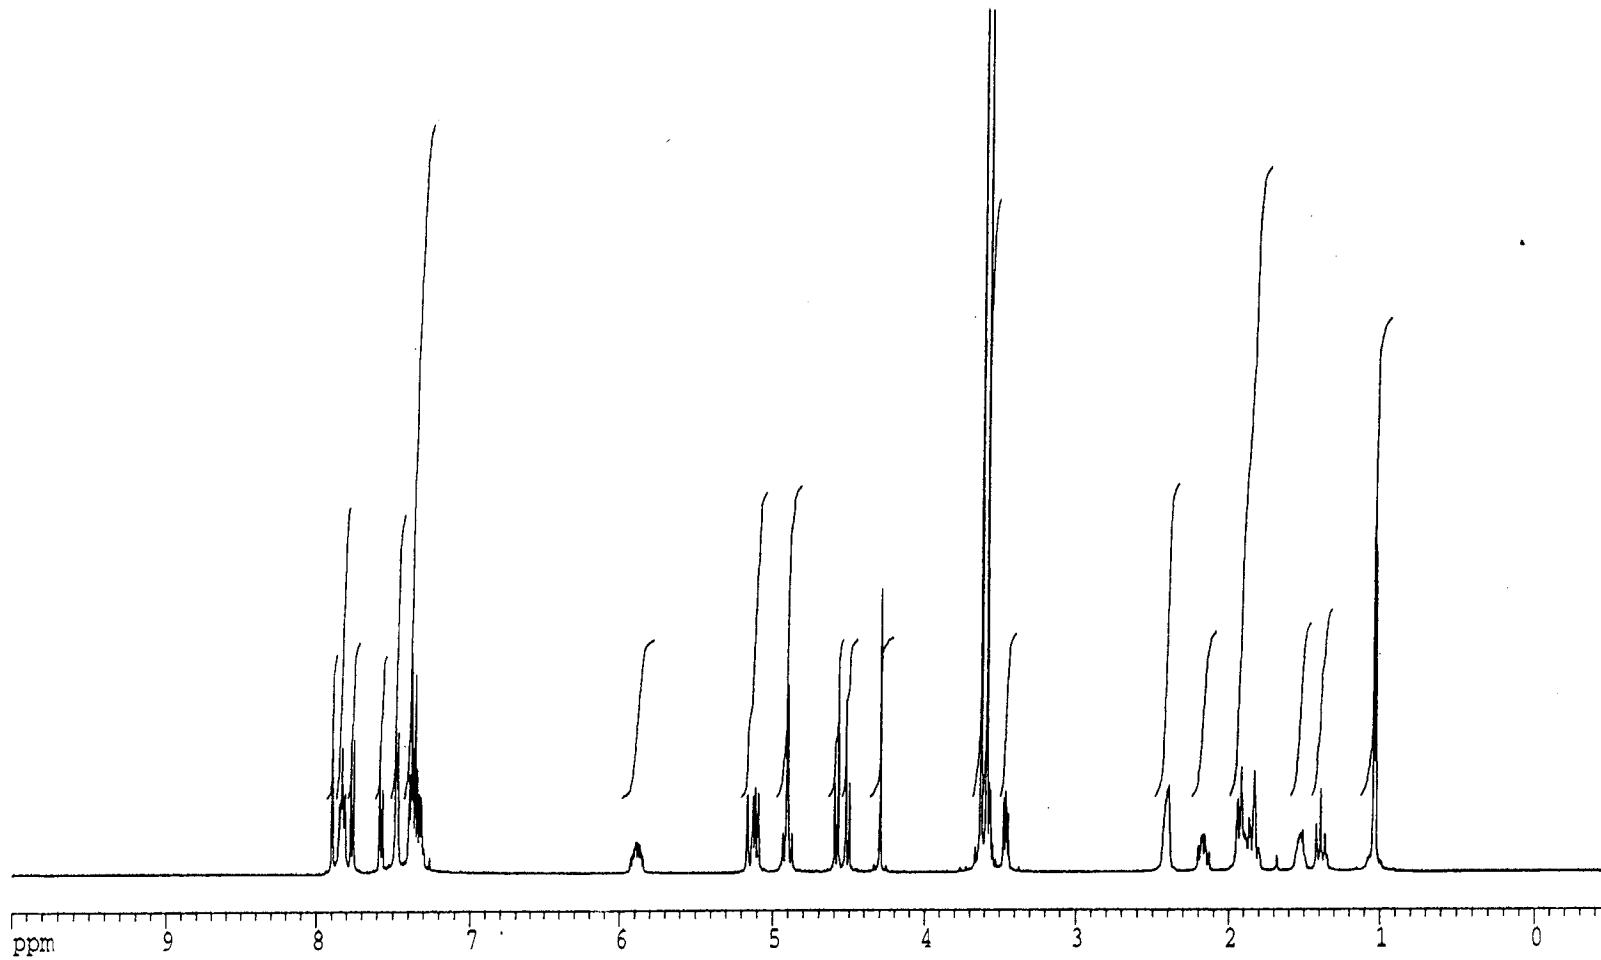

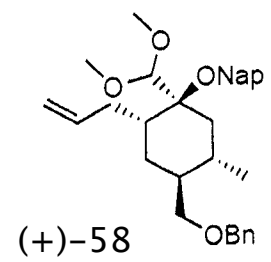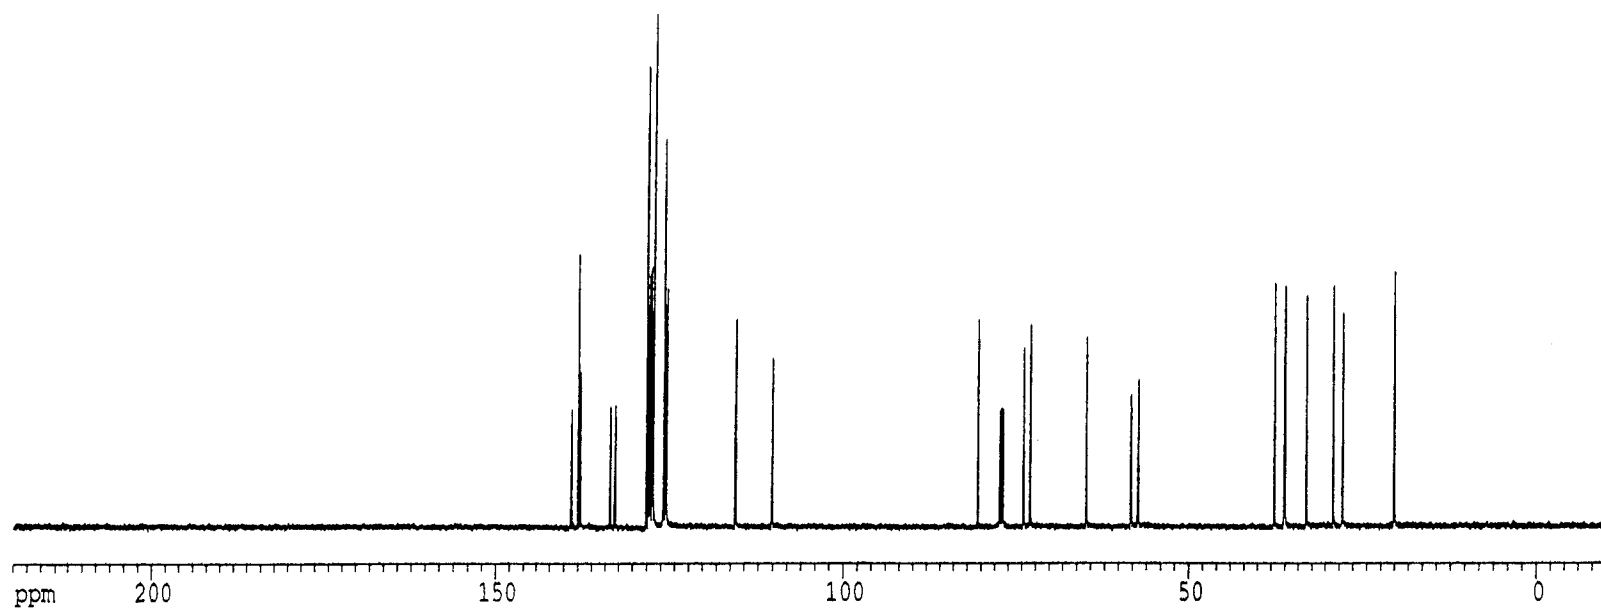

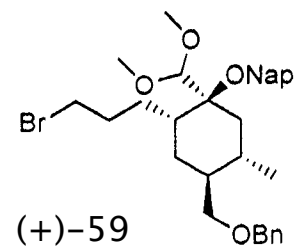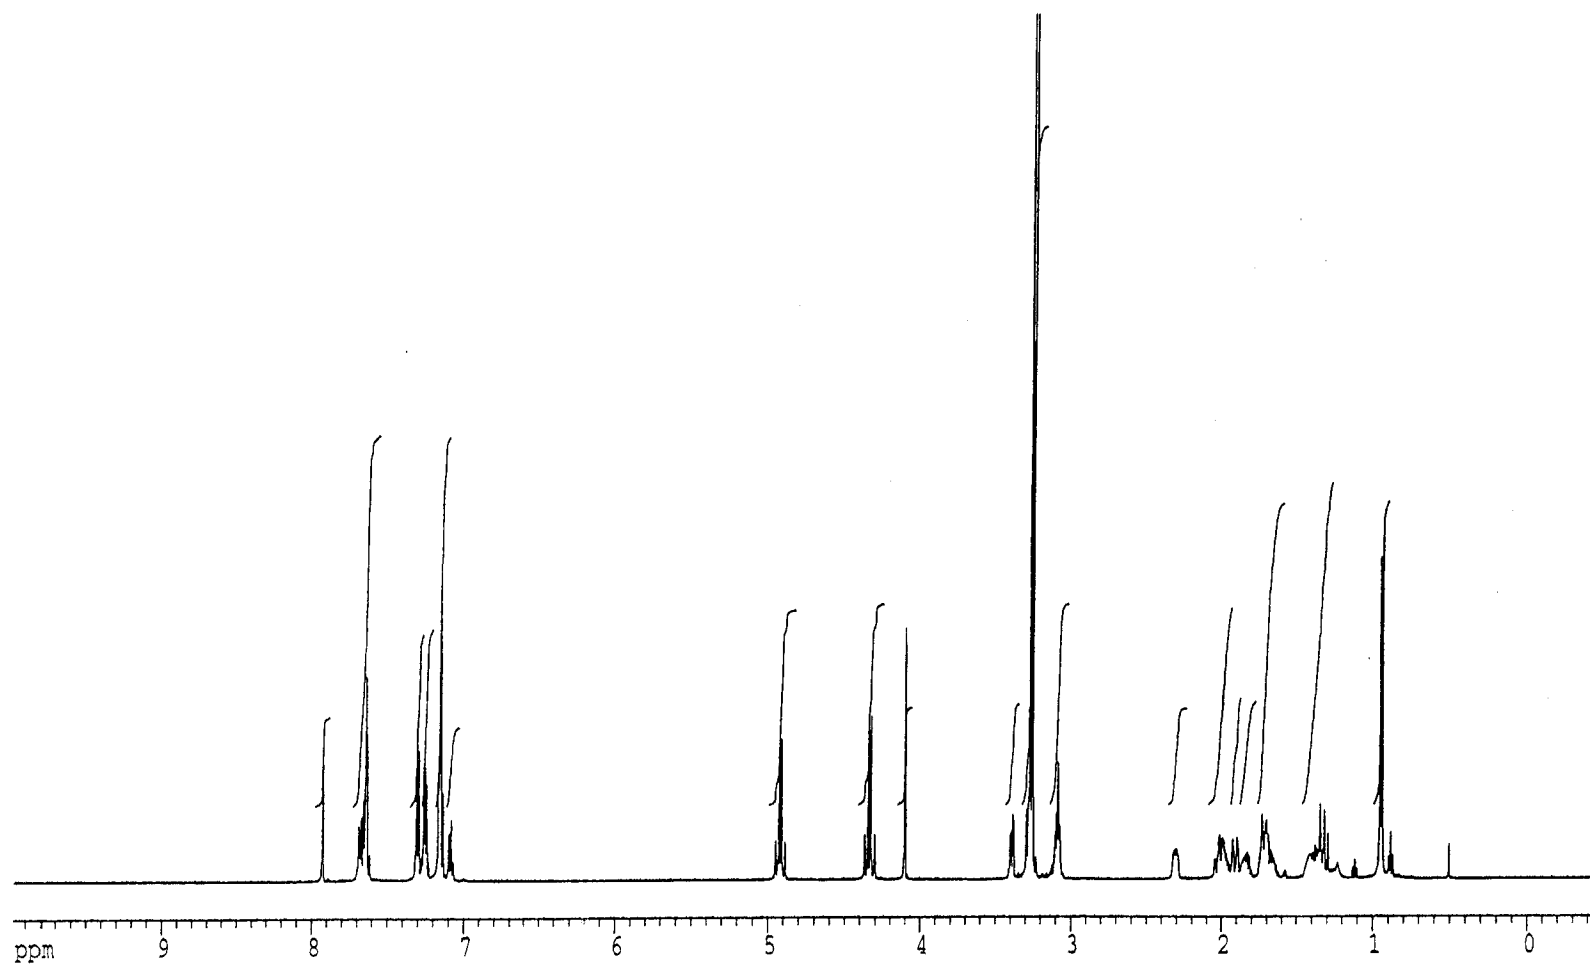

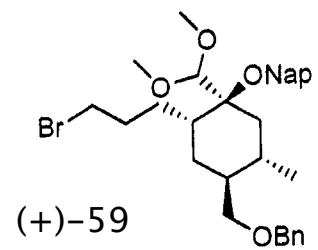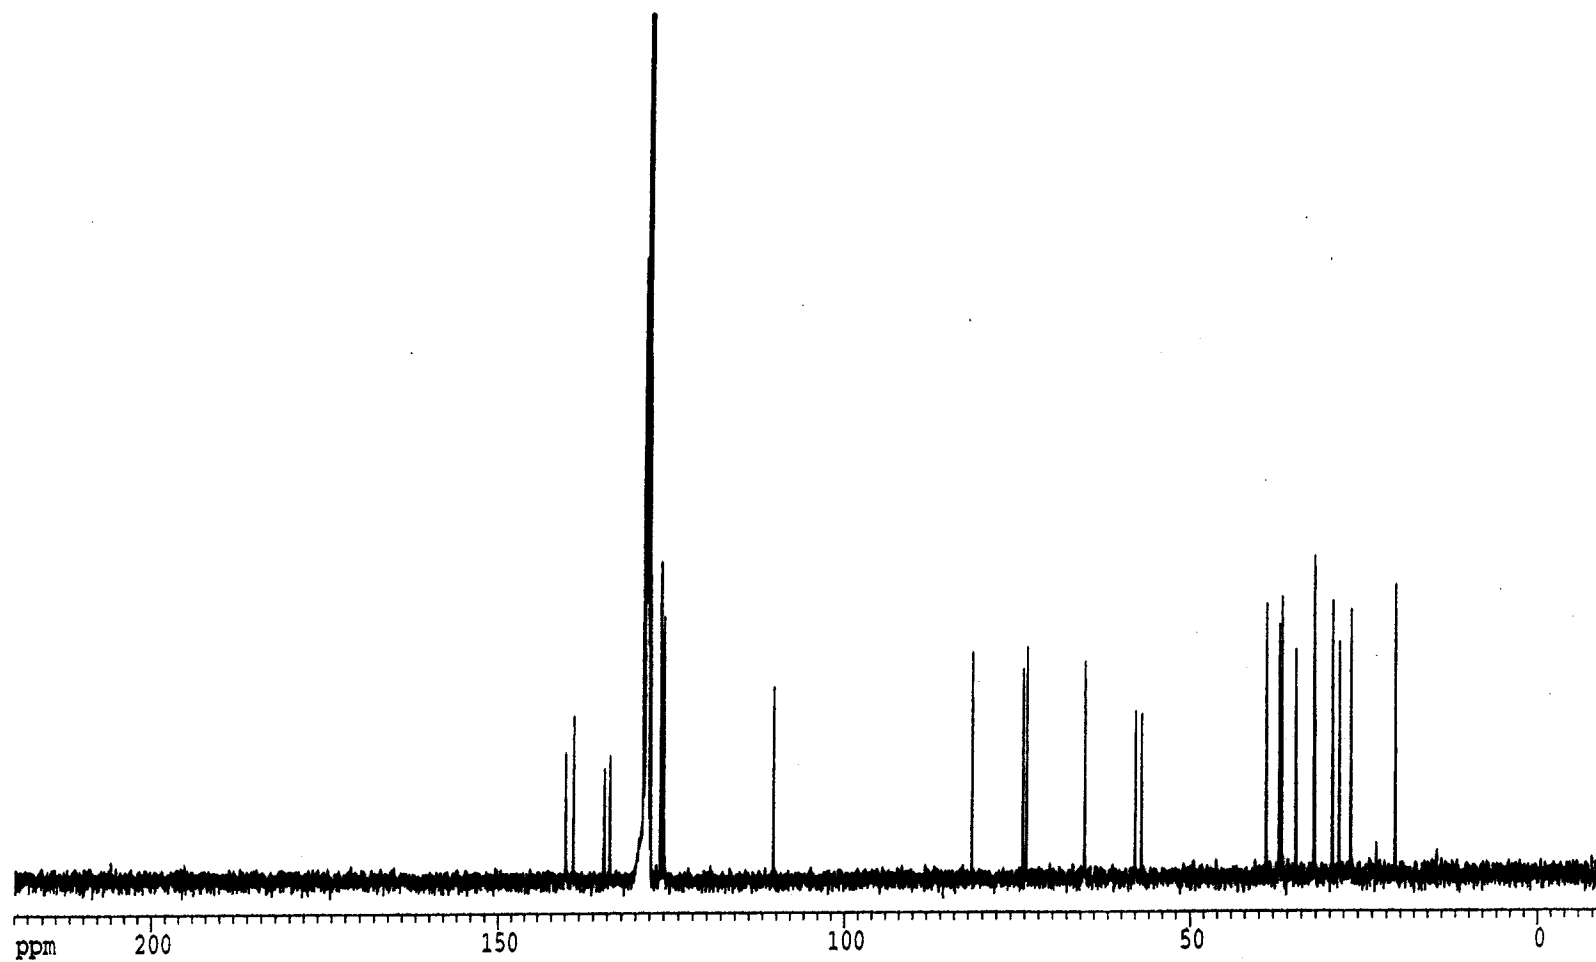

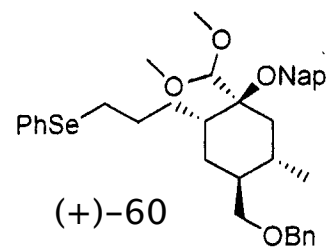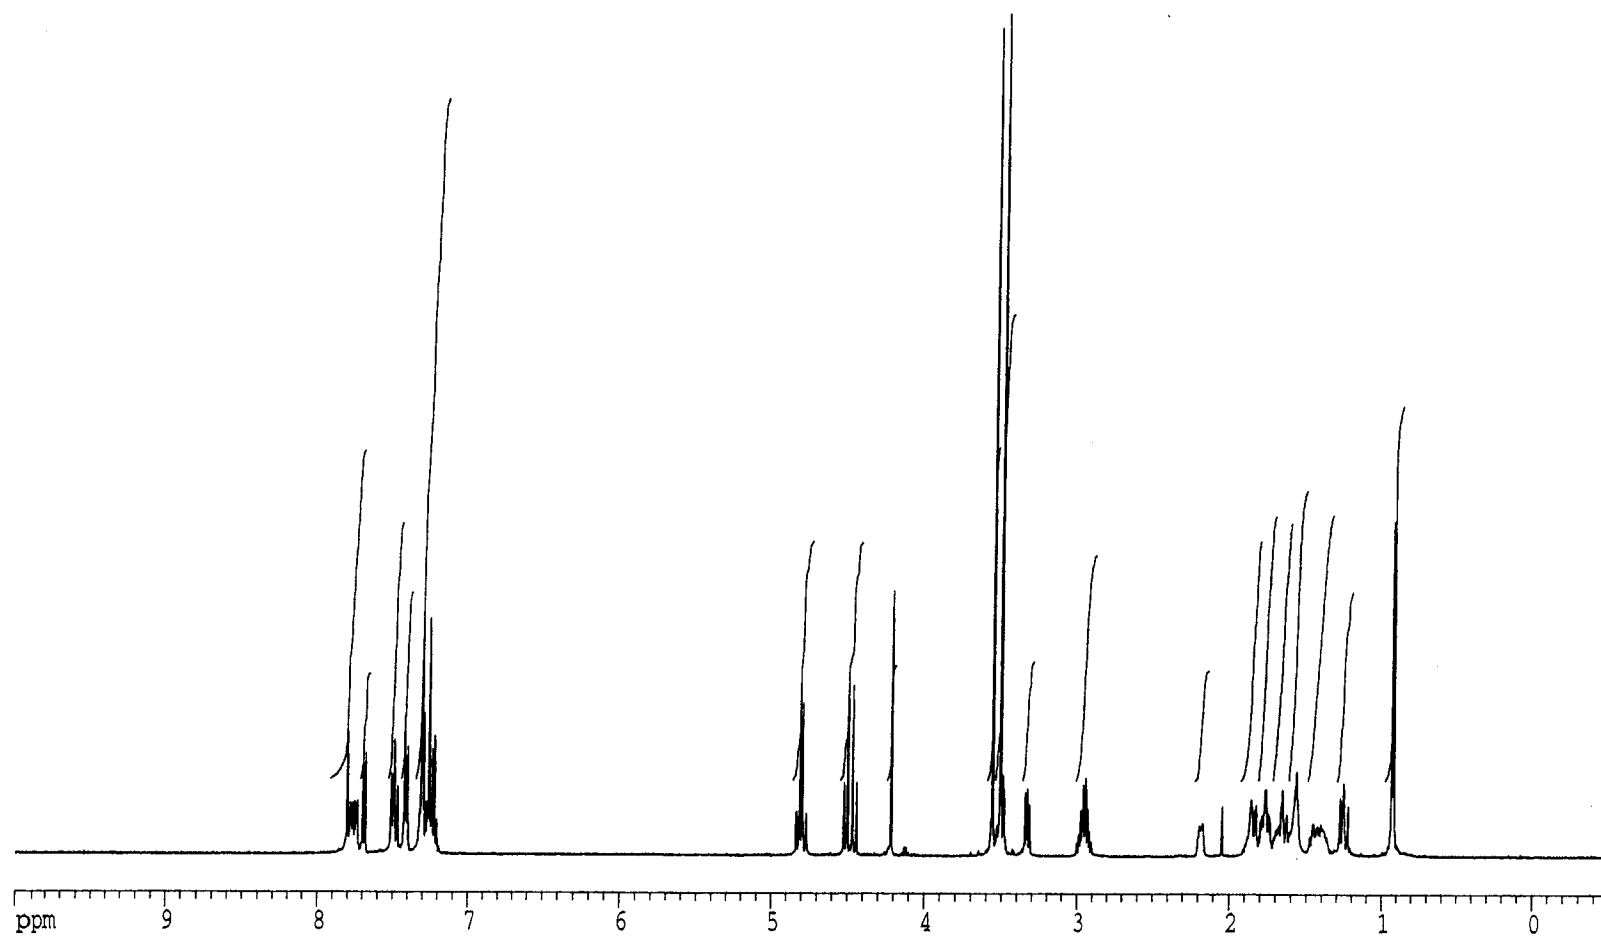

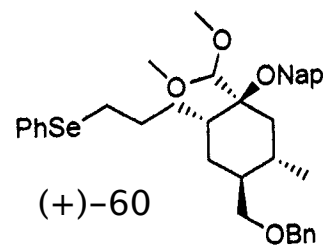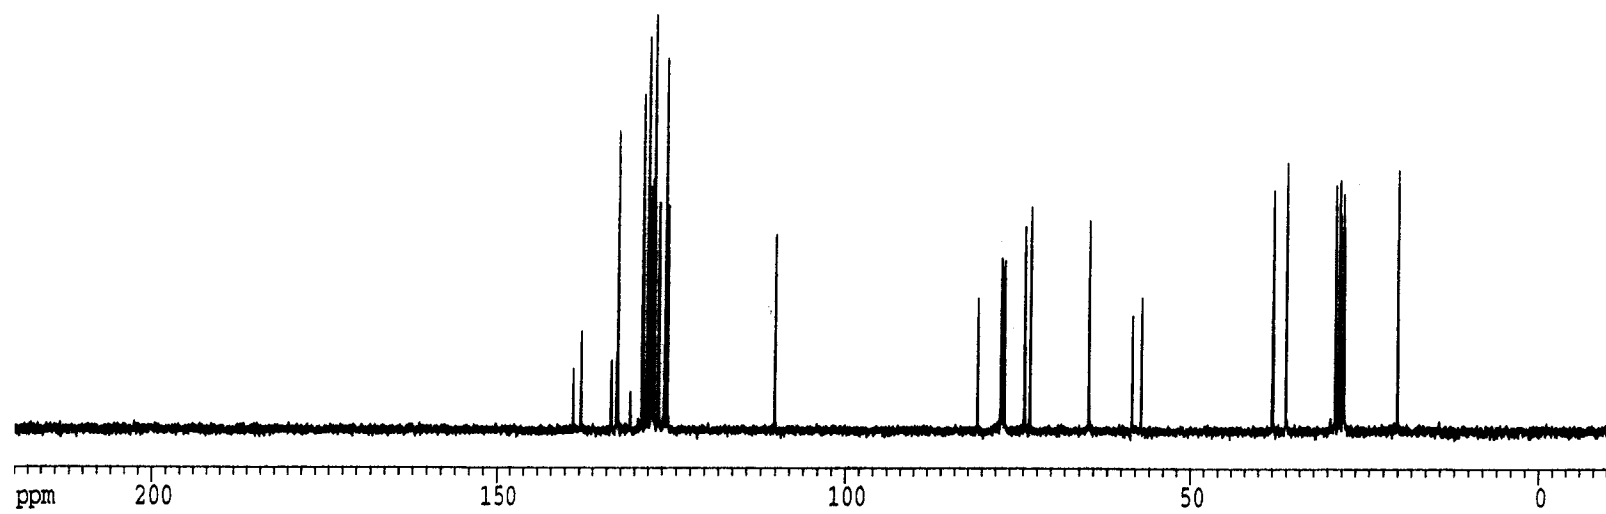

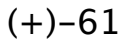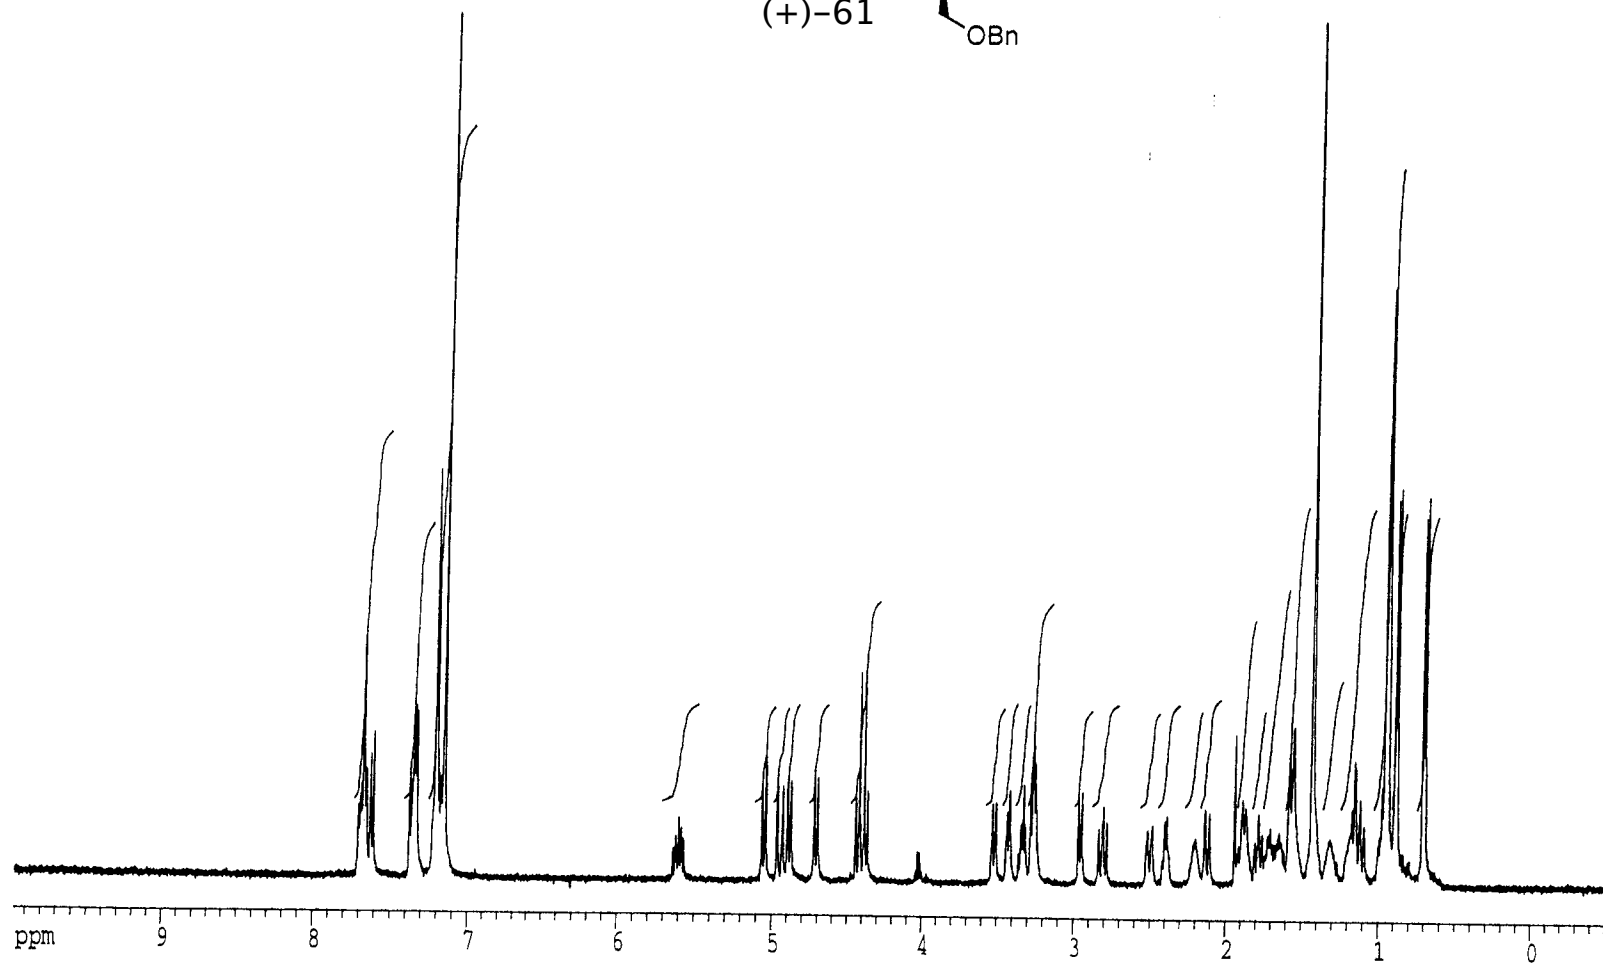

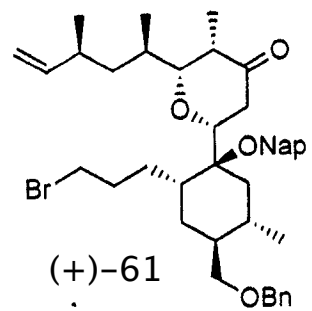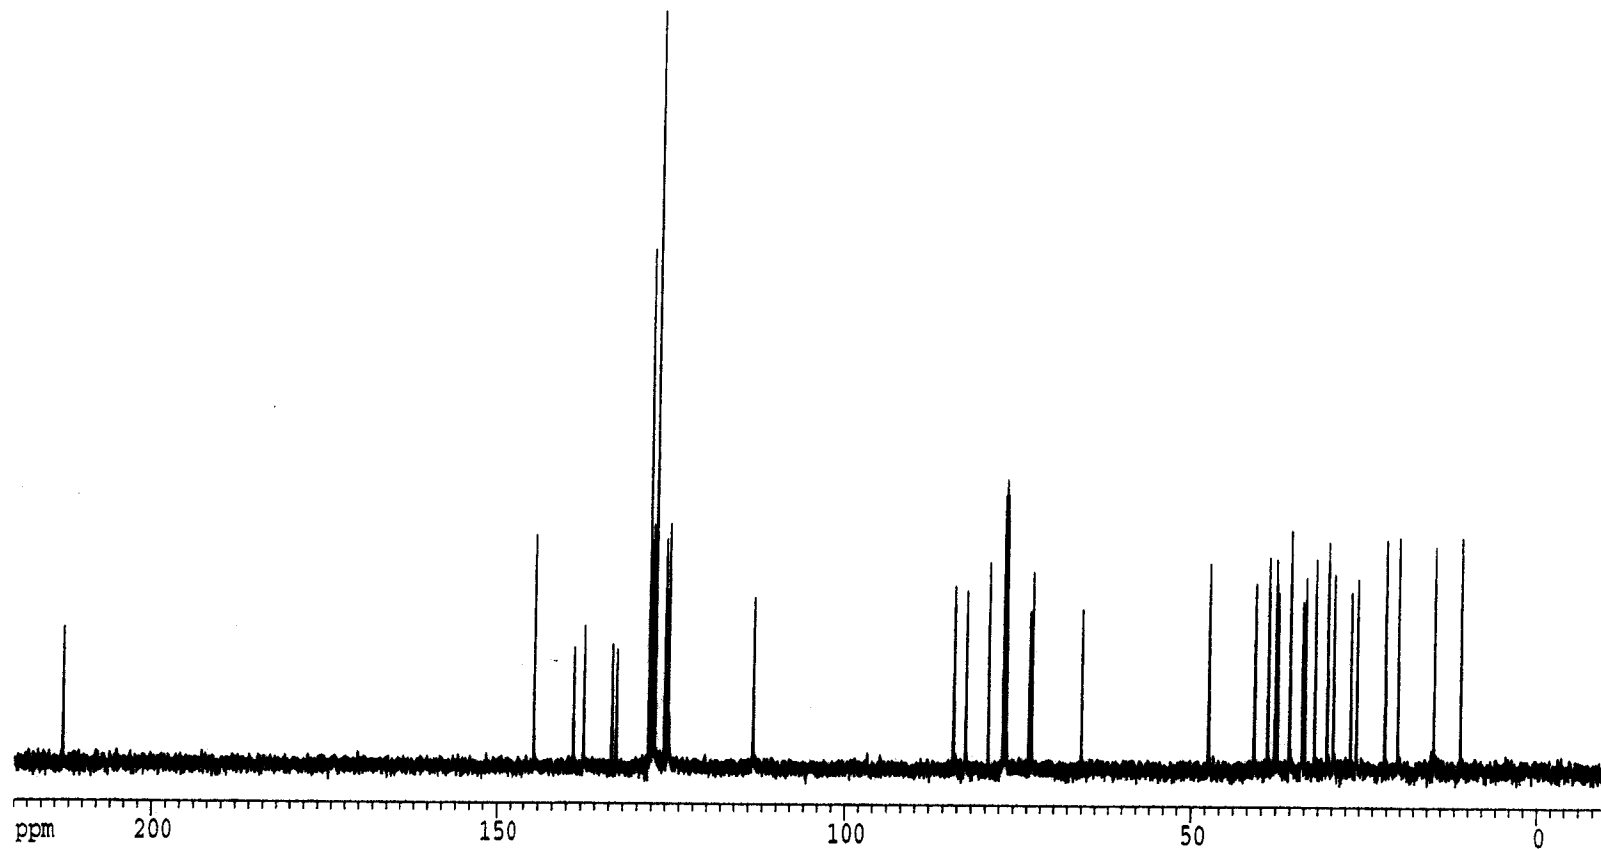

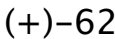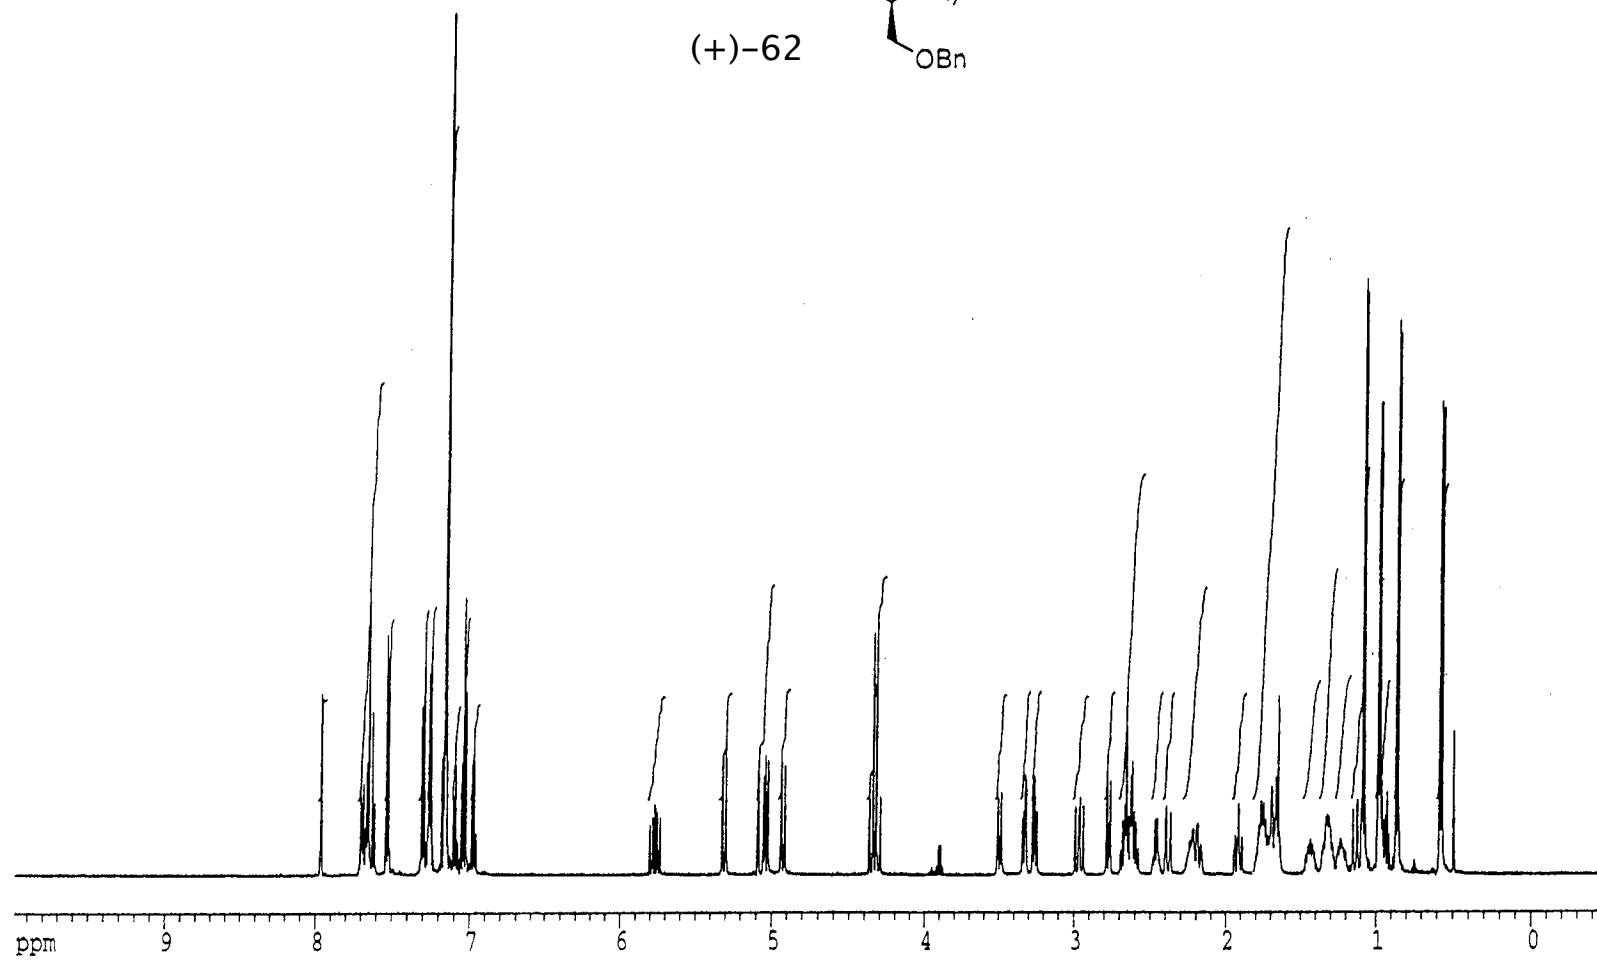

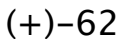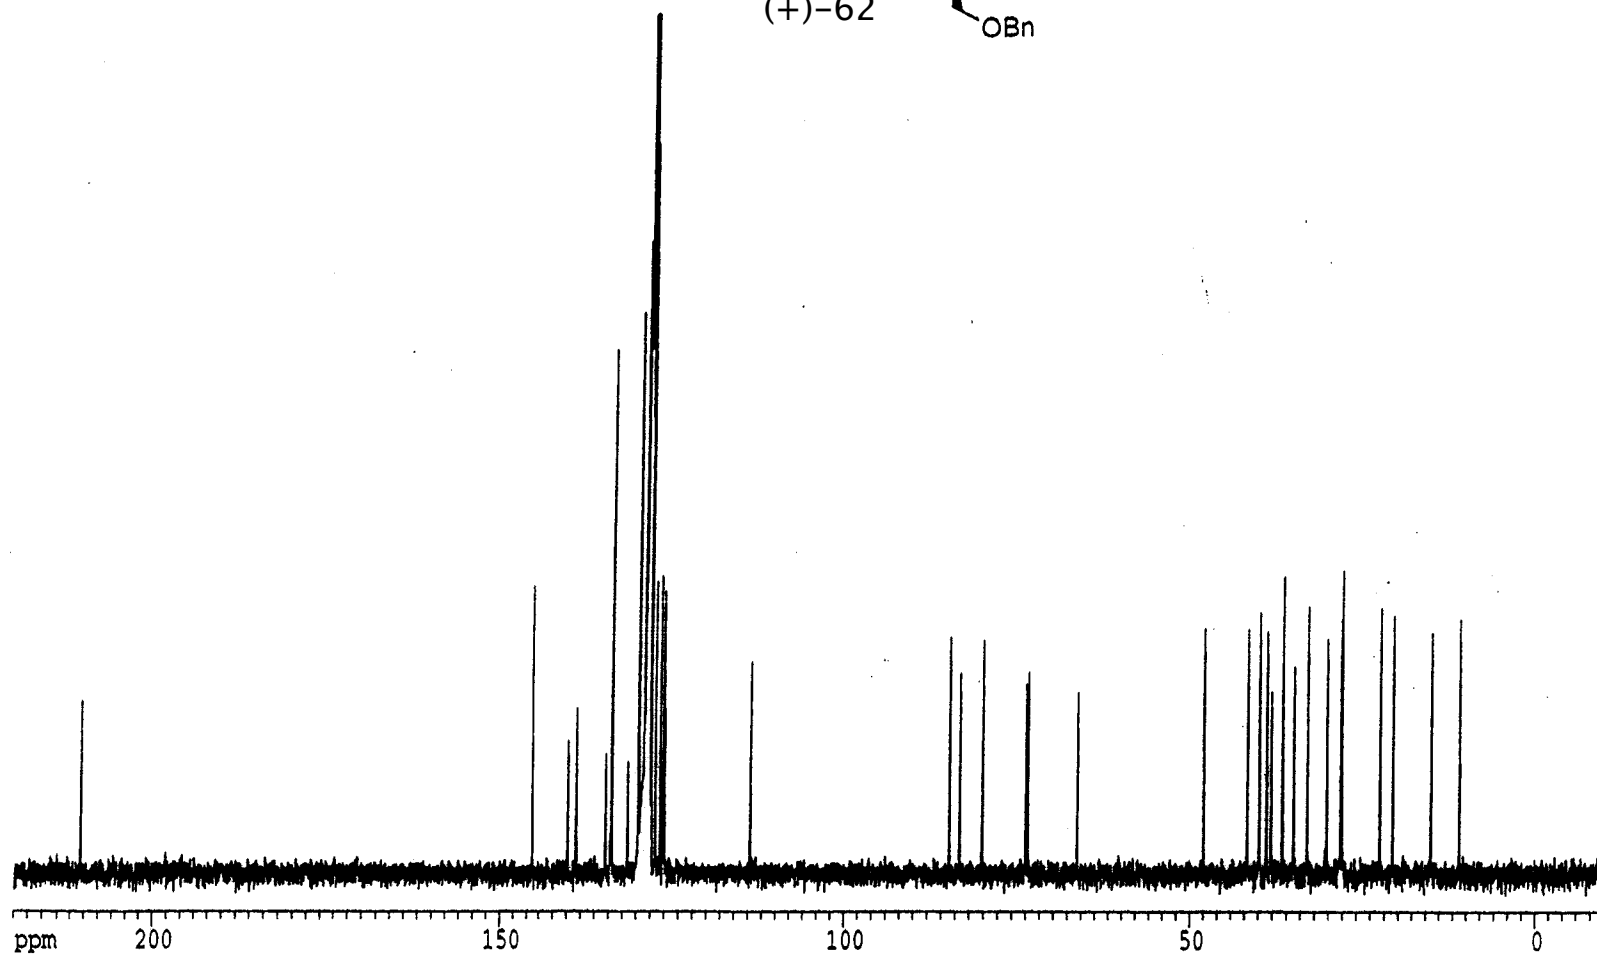

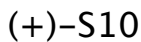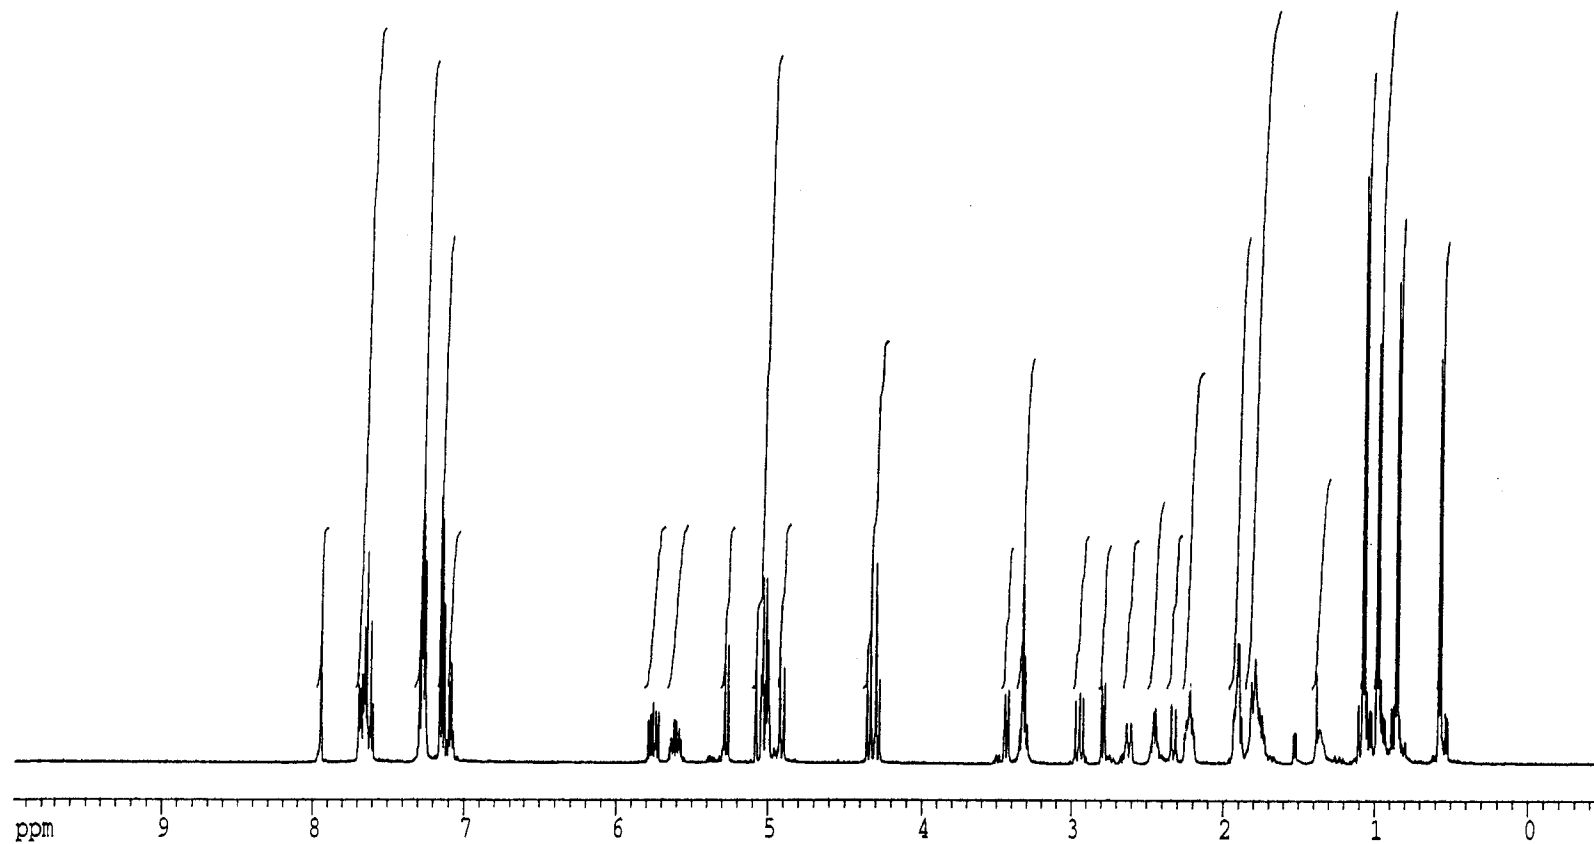

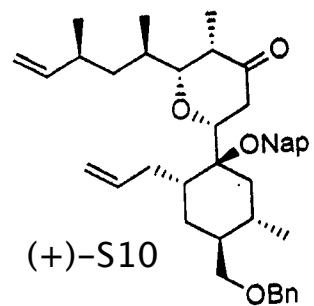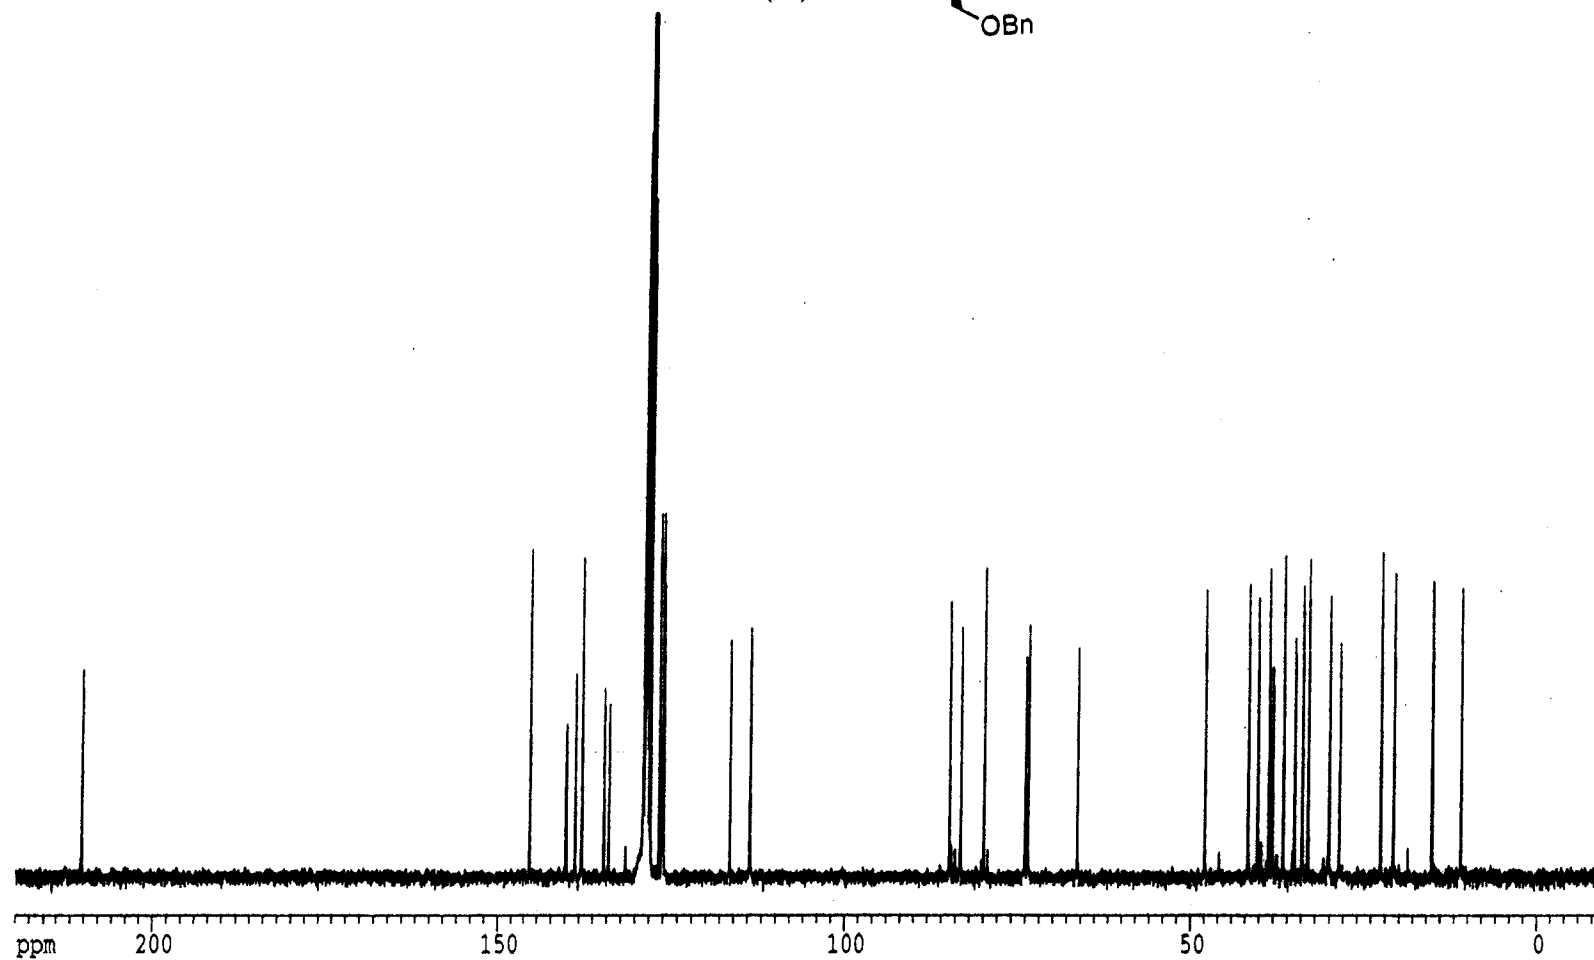

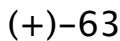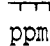

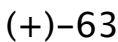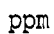

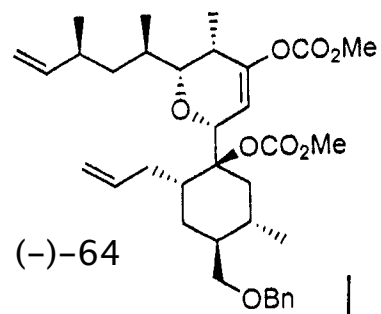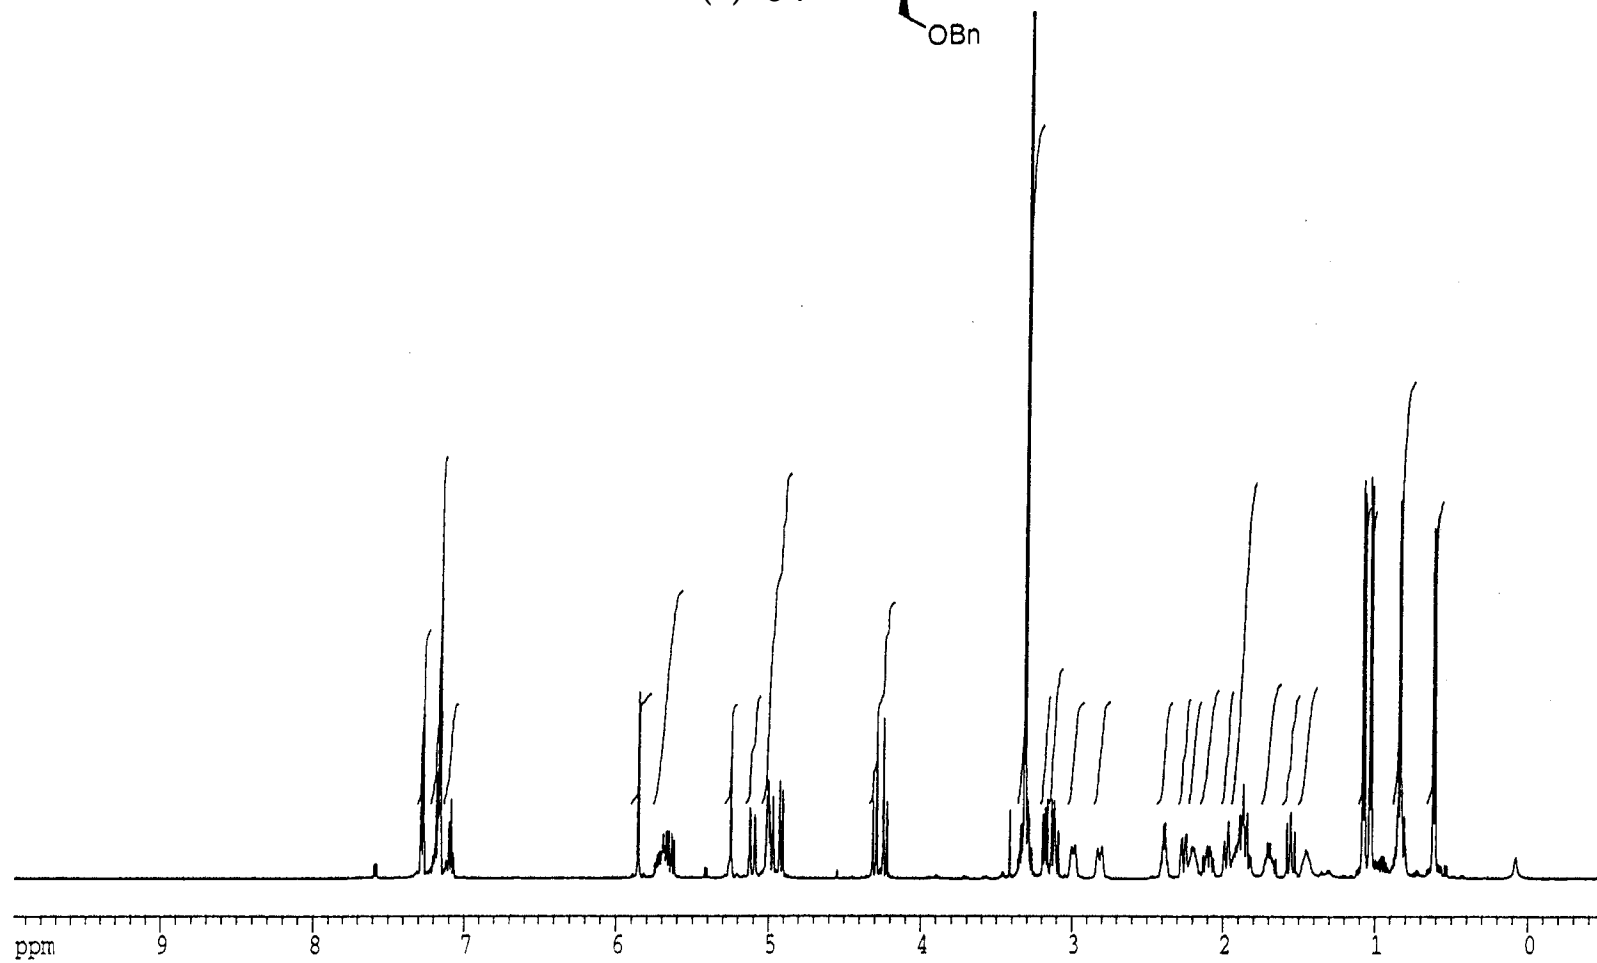

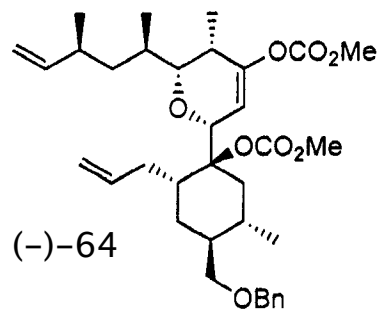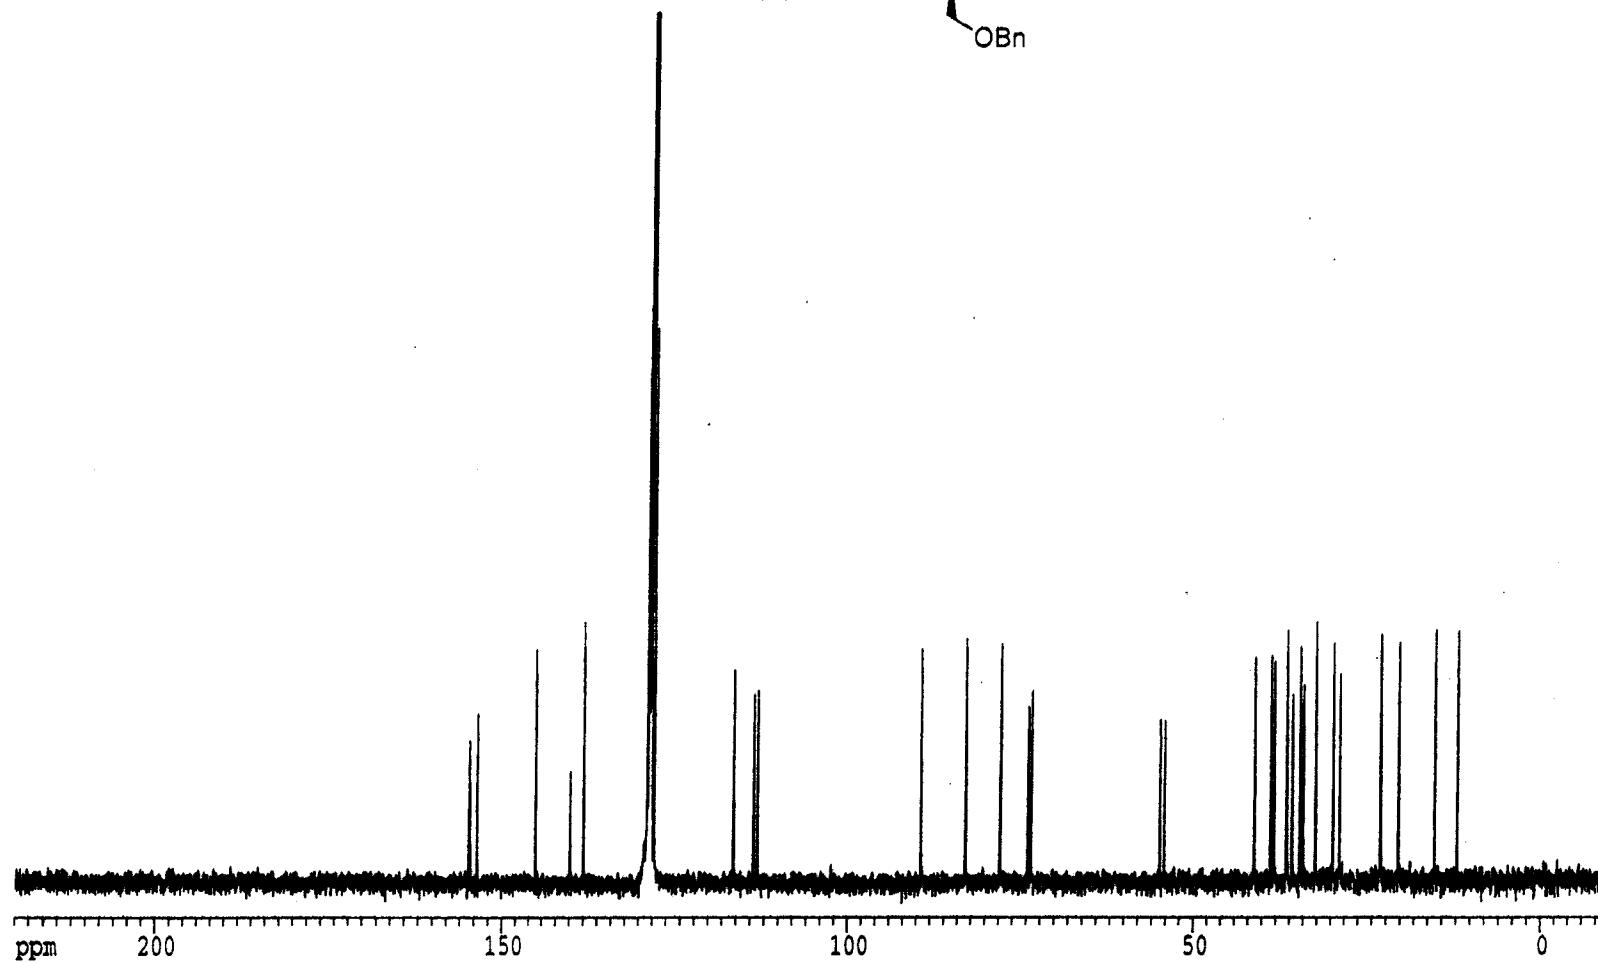

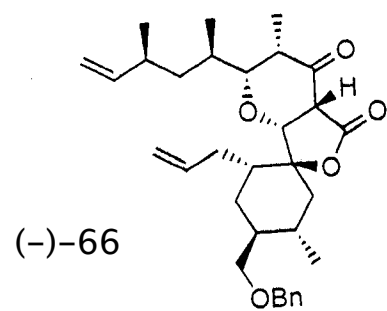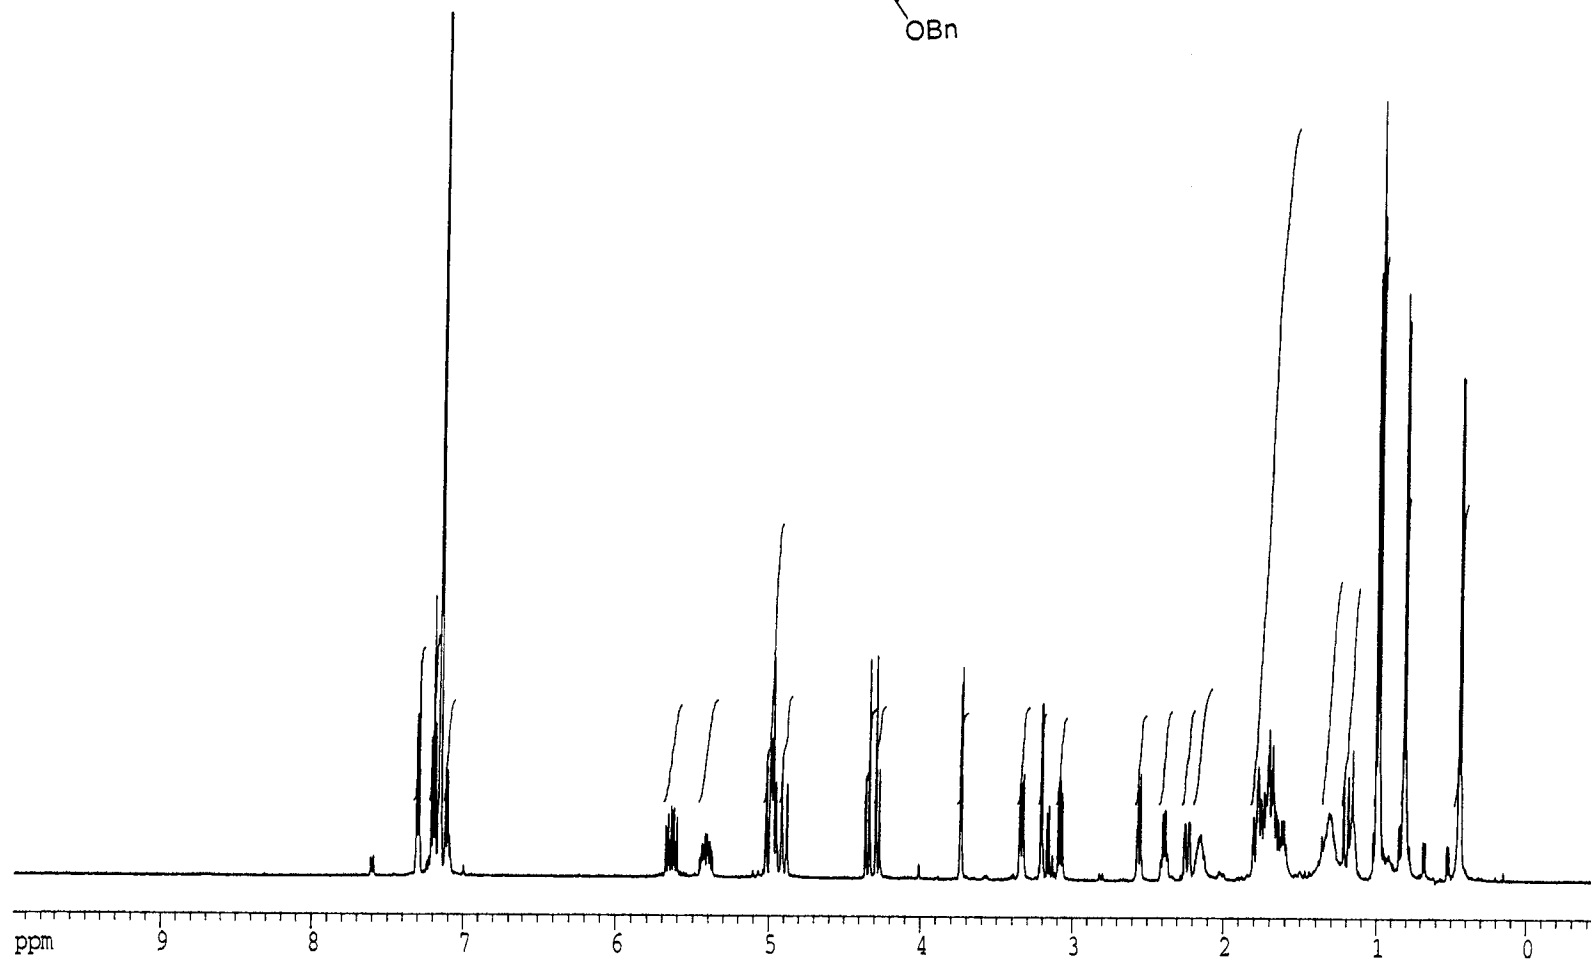

(-)-66

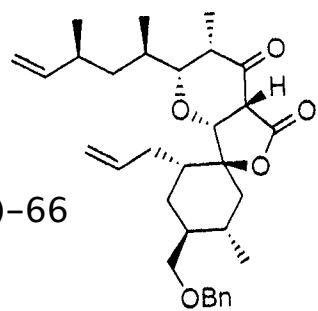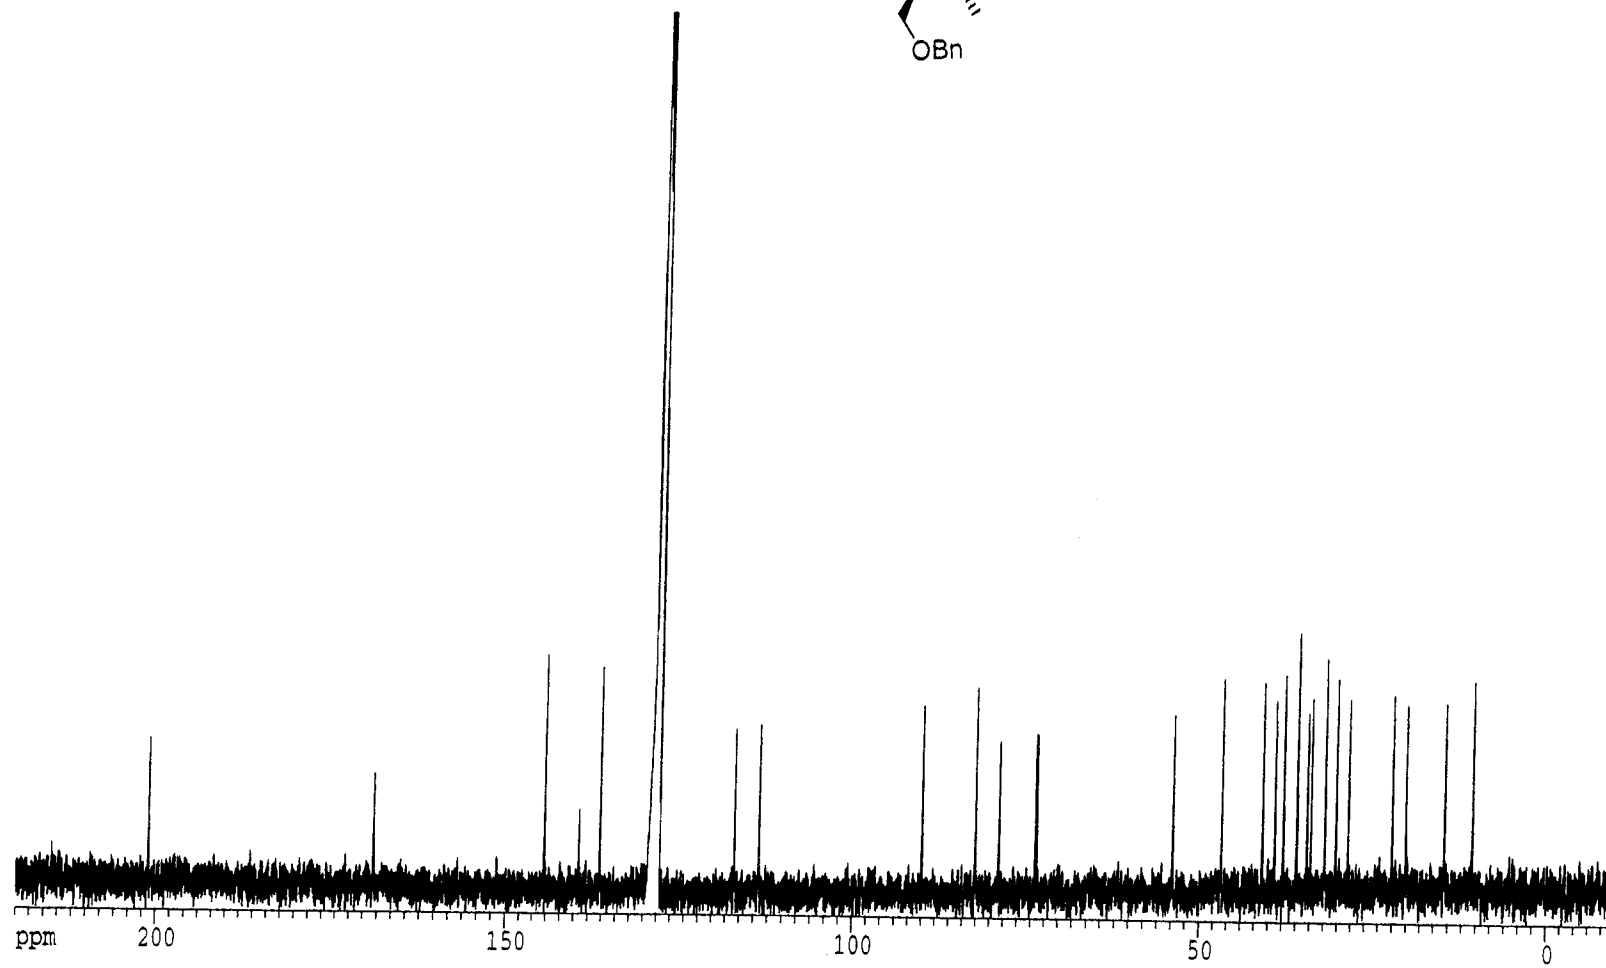

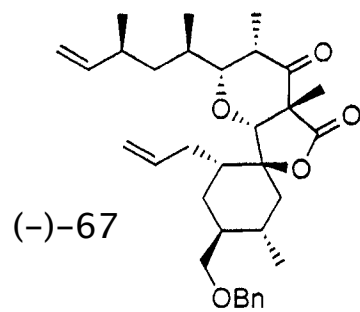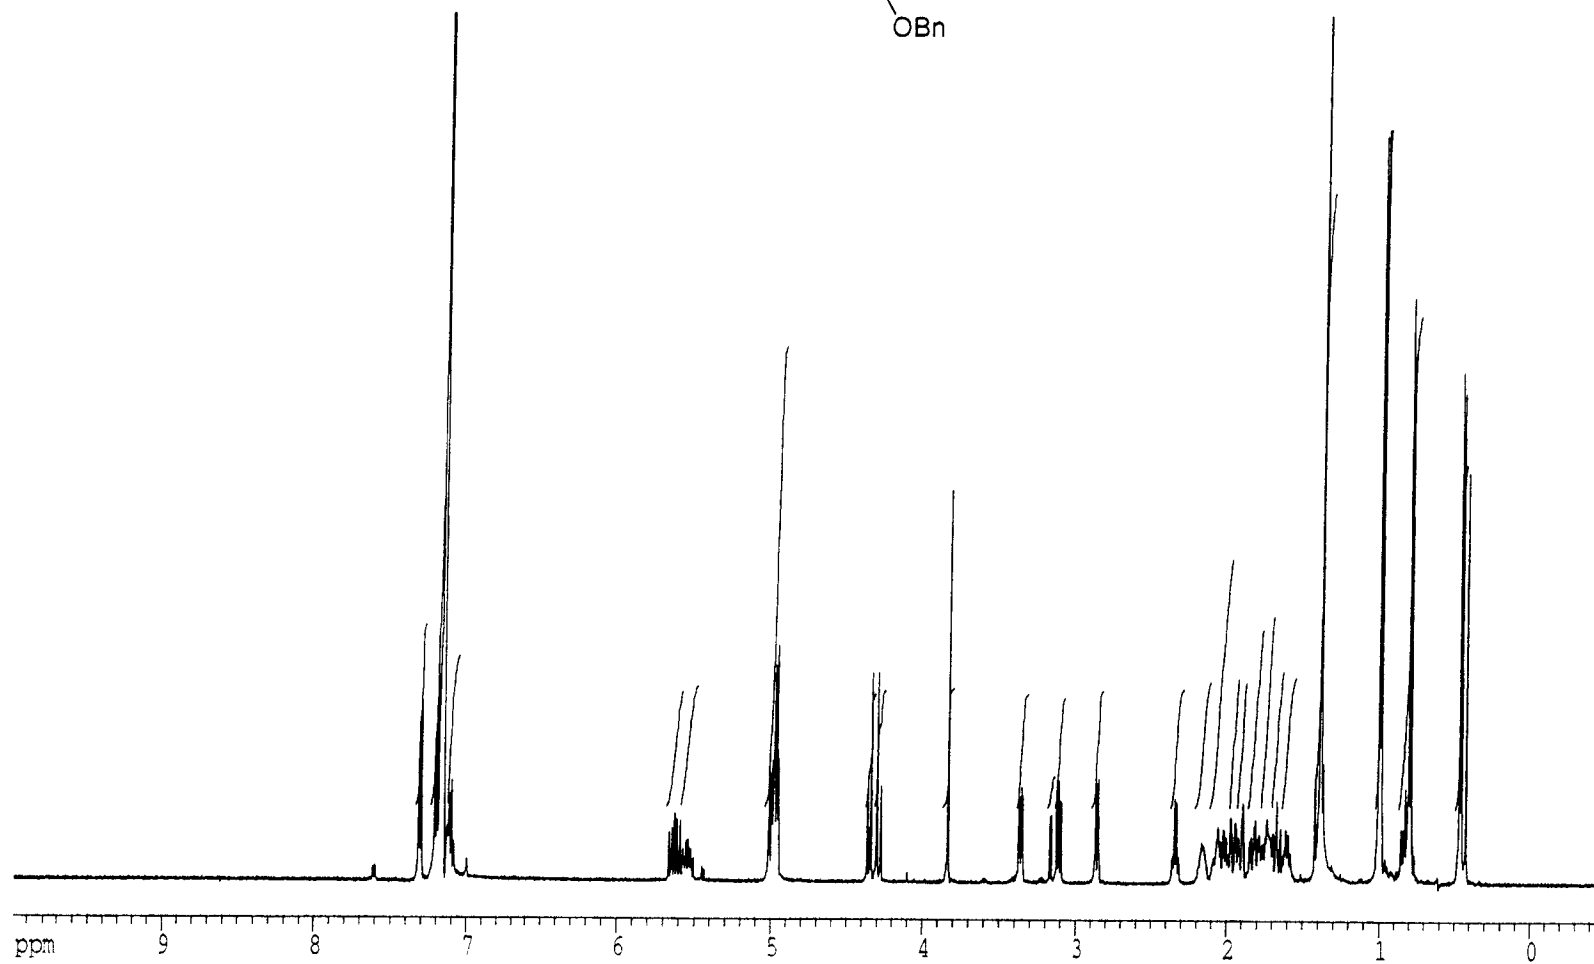

(-)-67

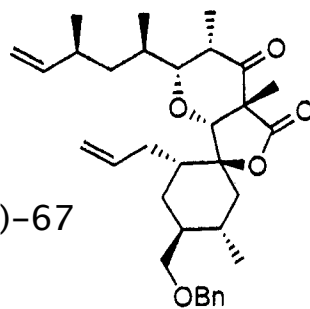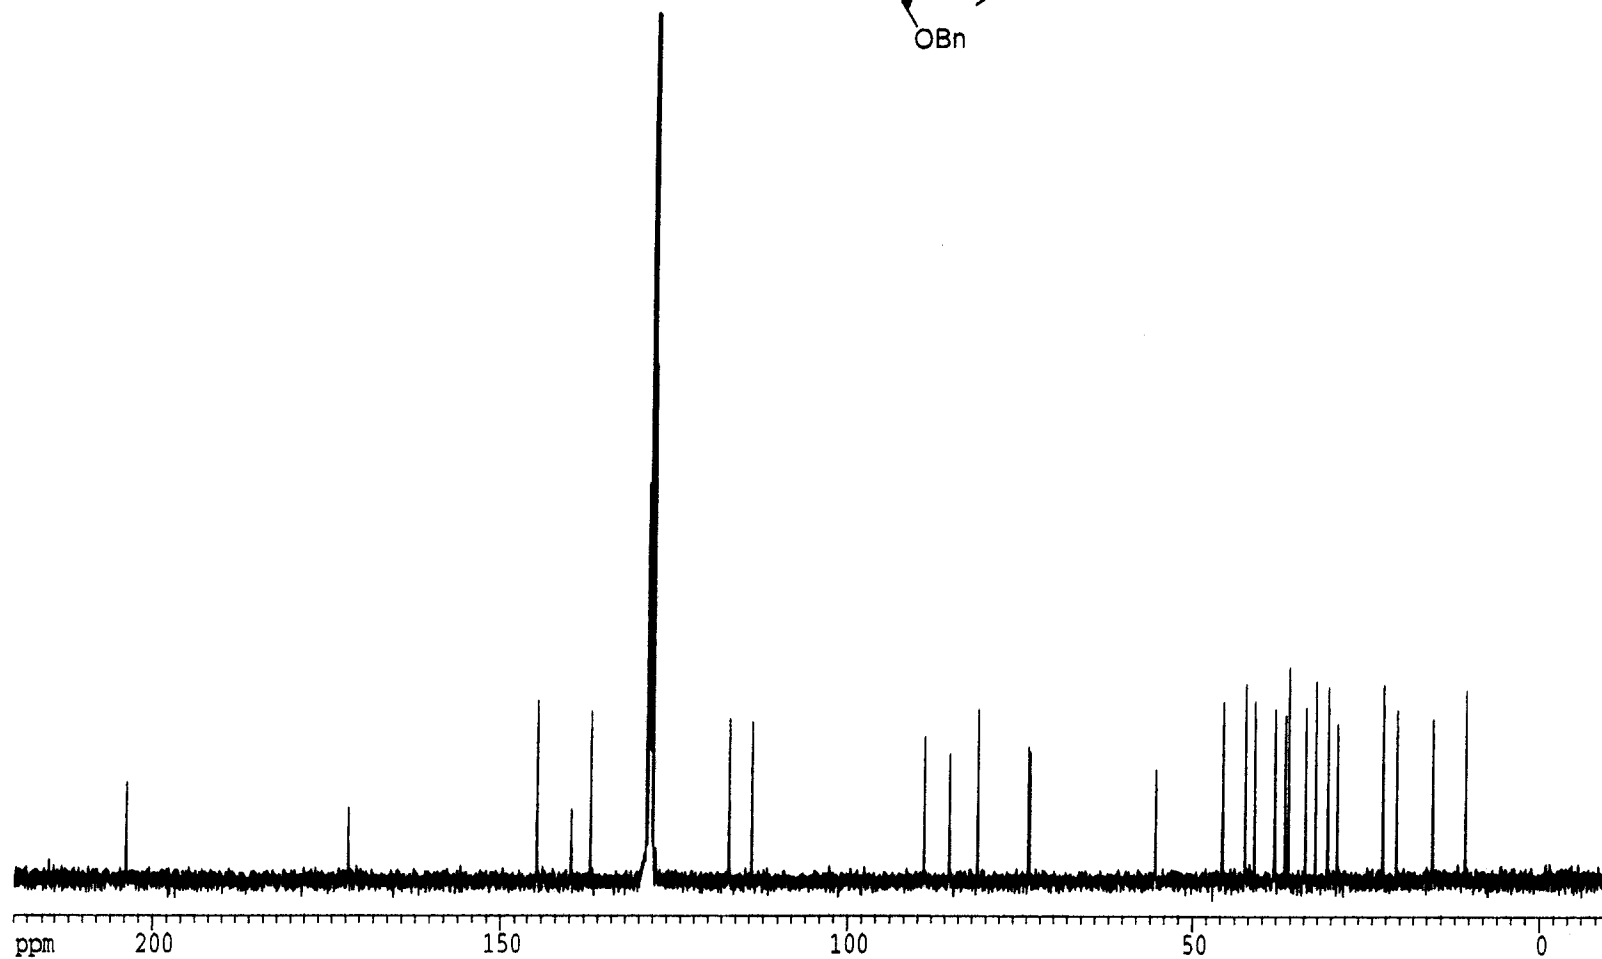

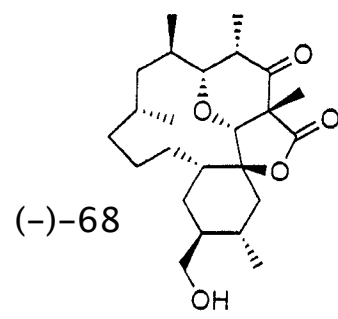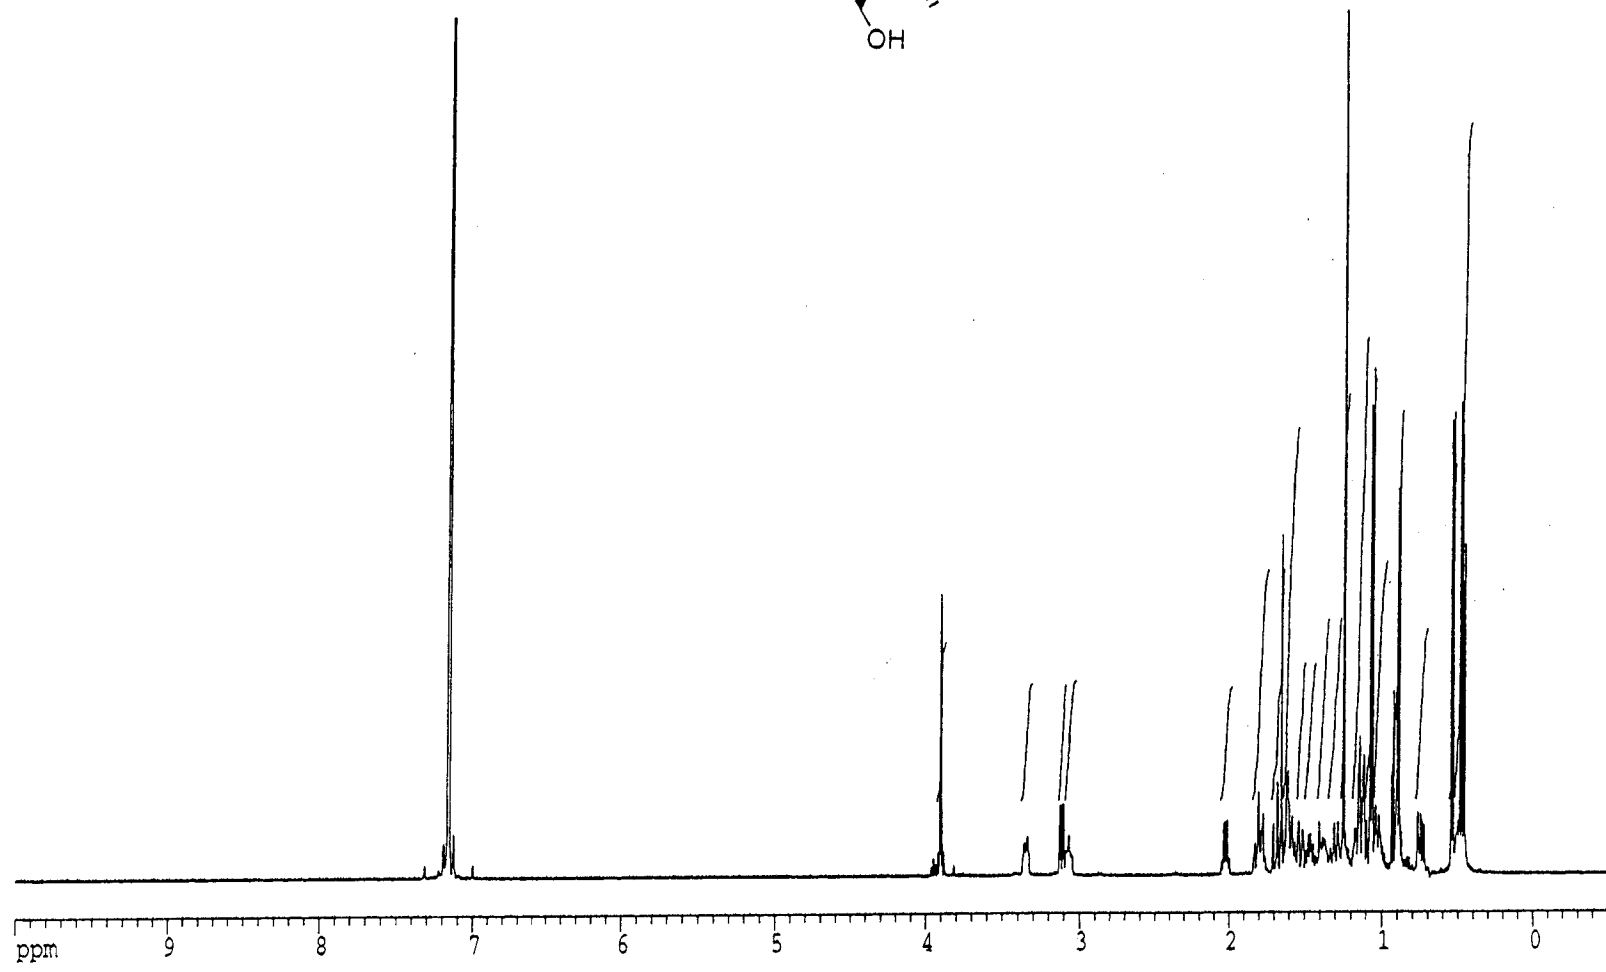

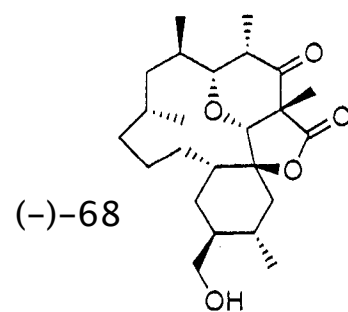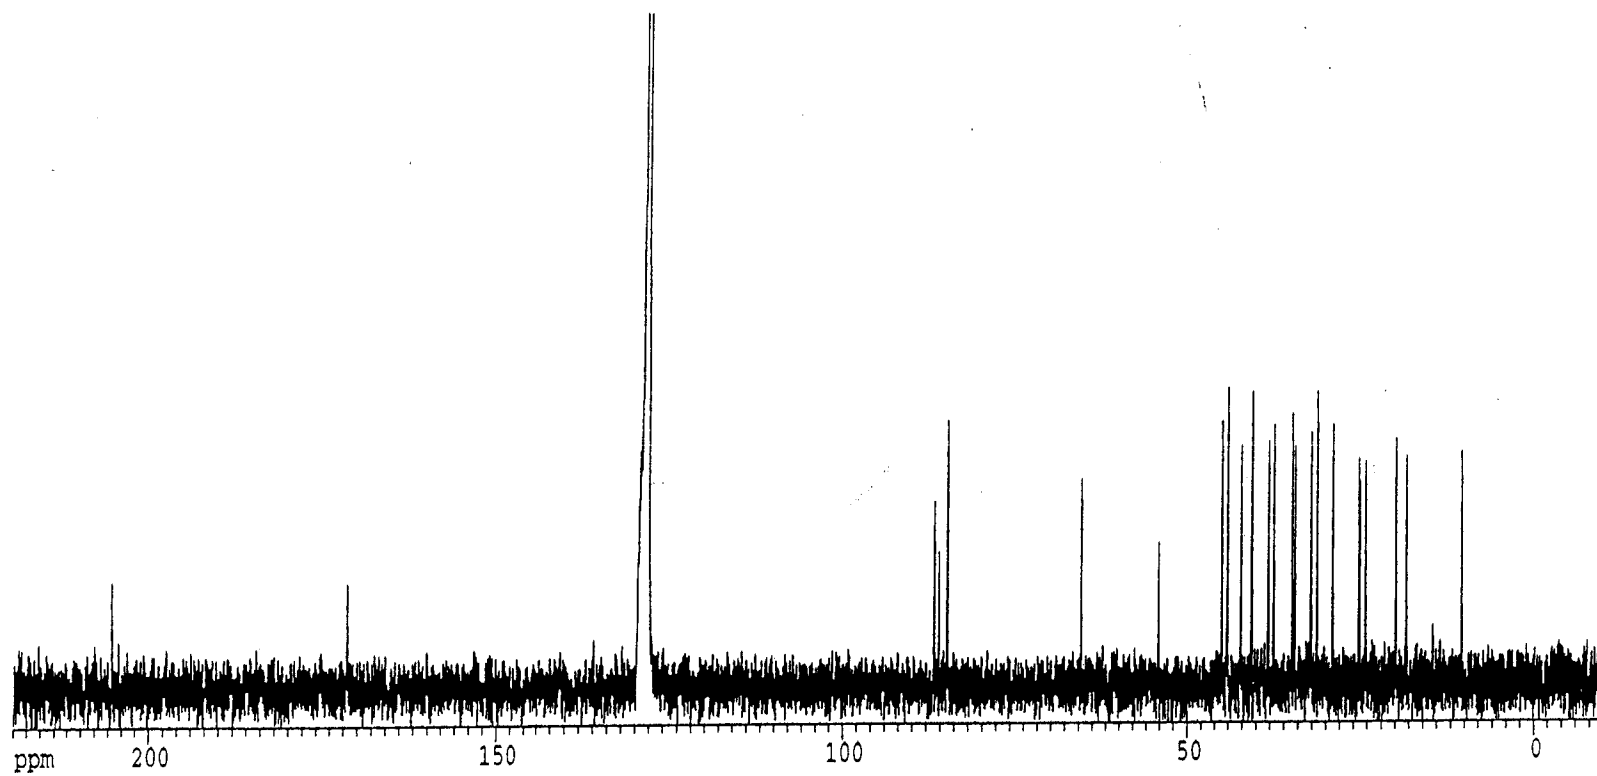

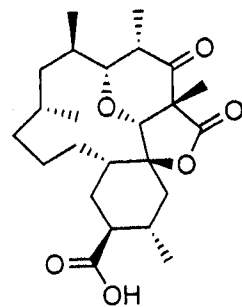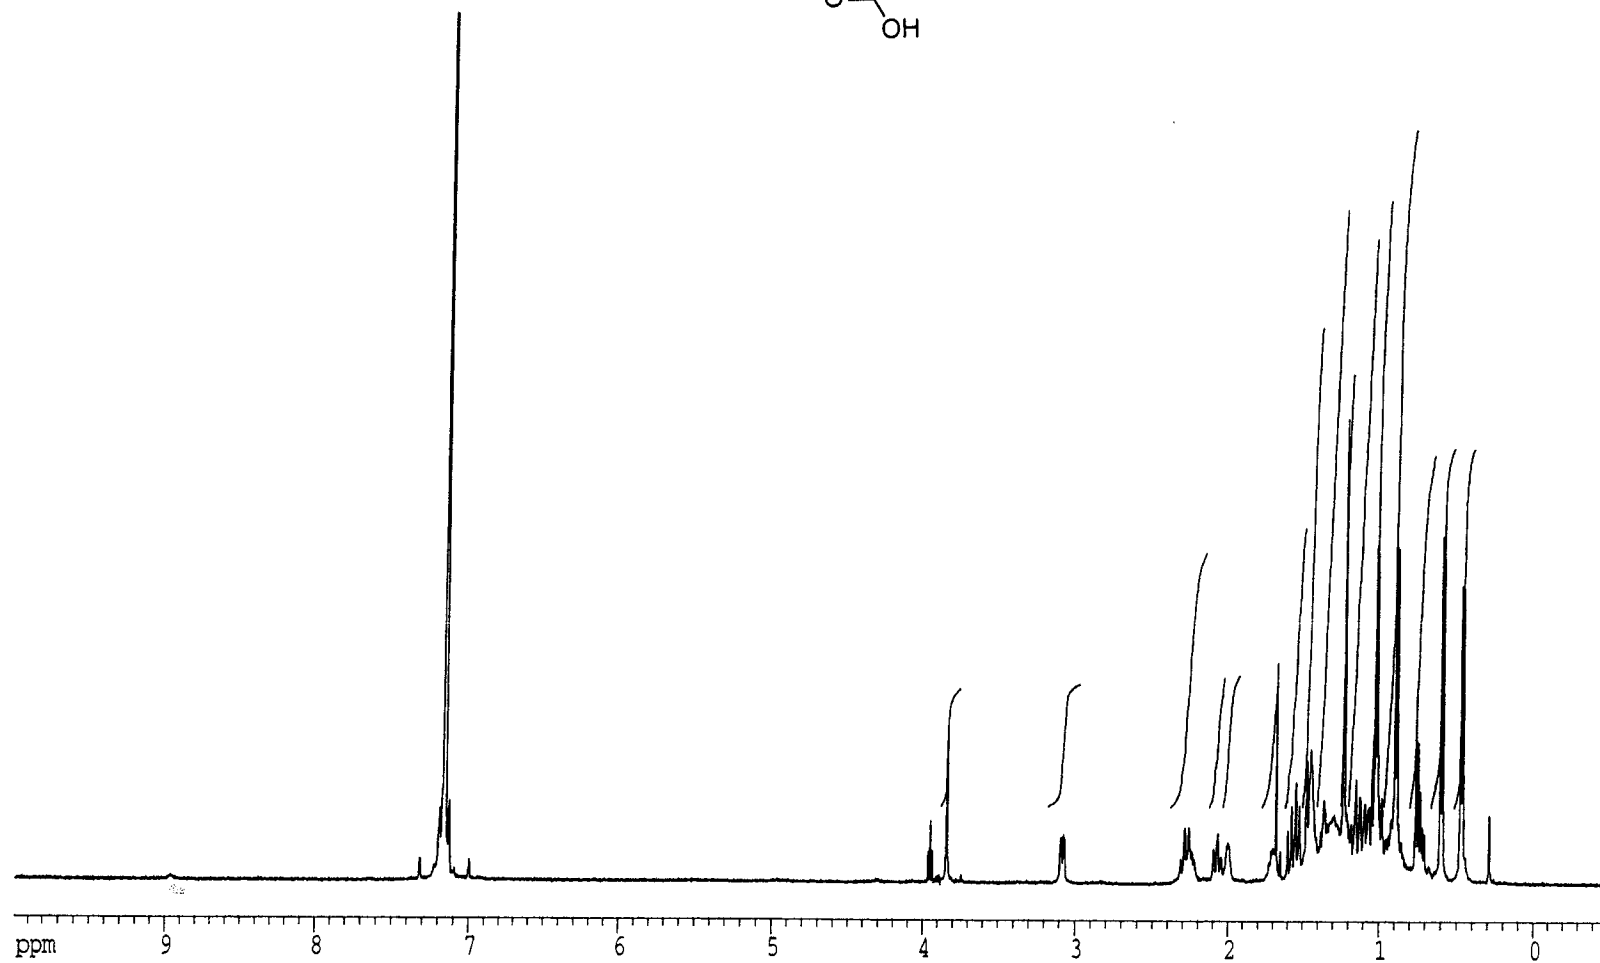

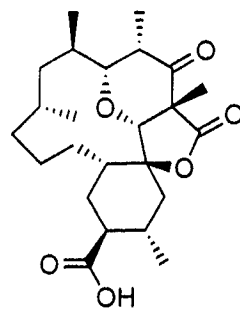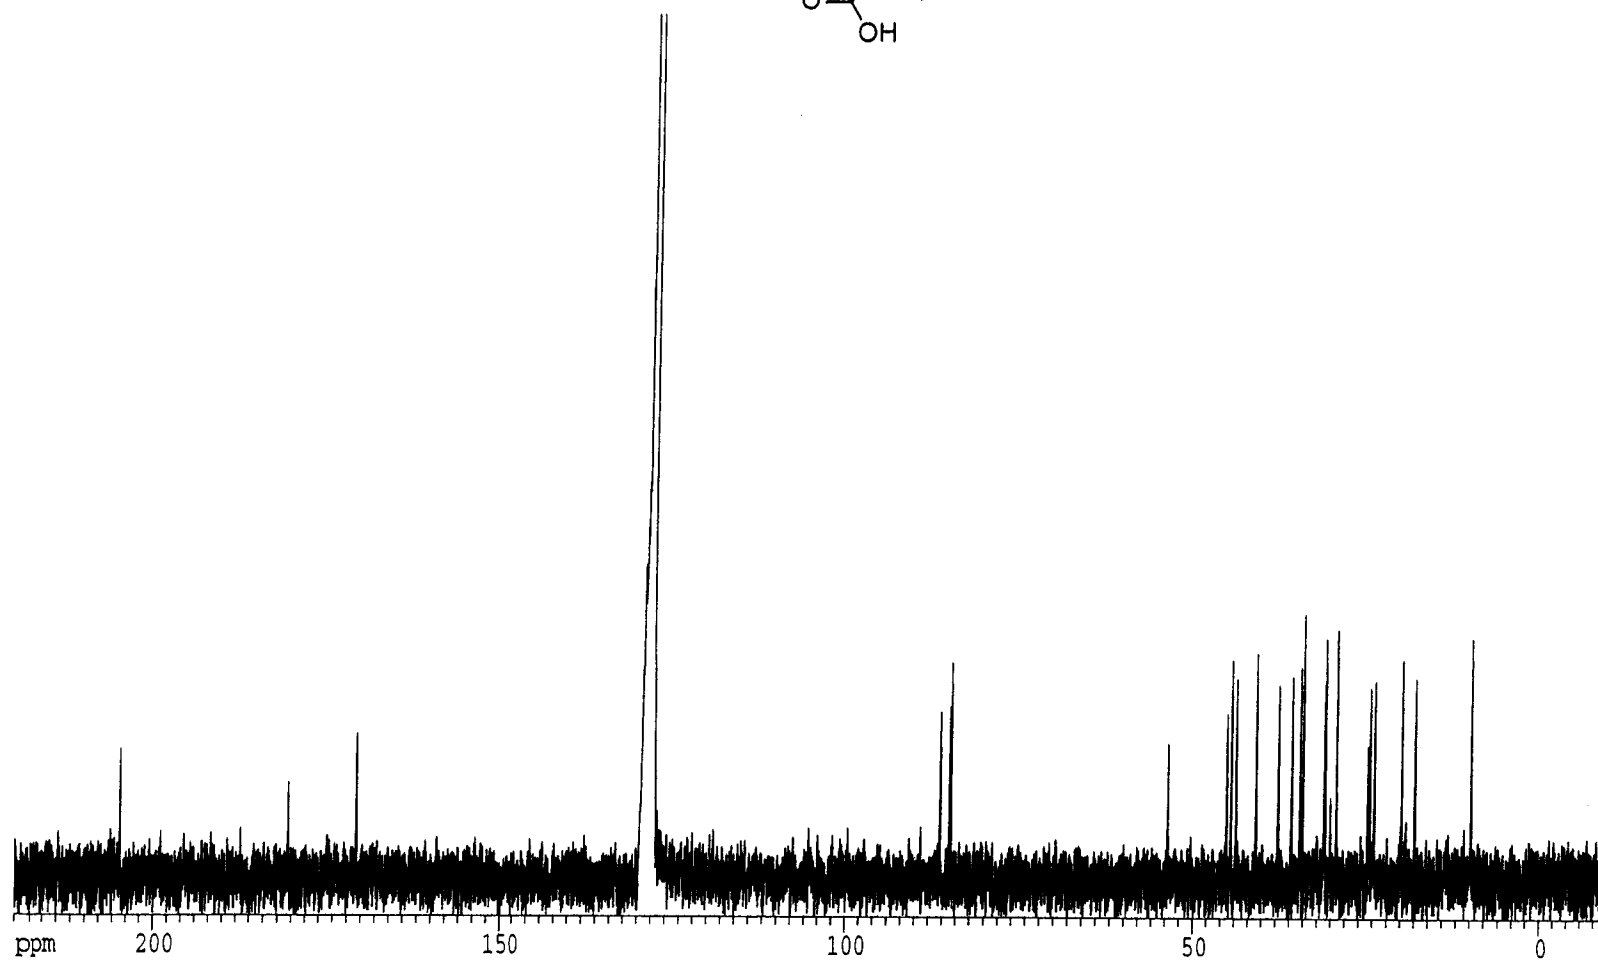

(-)-3

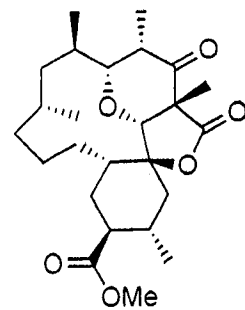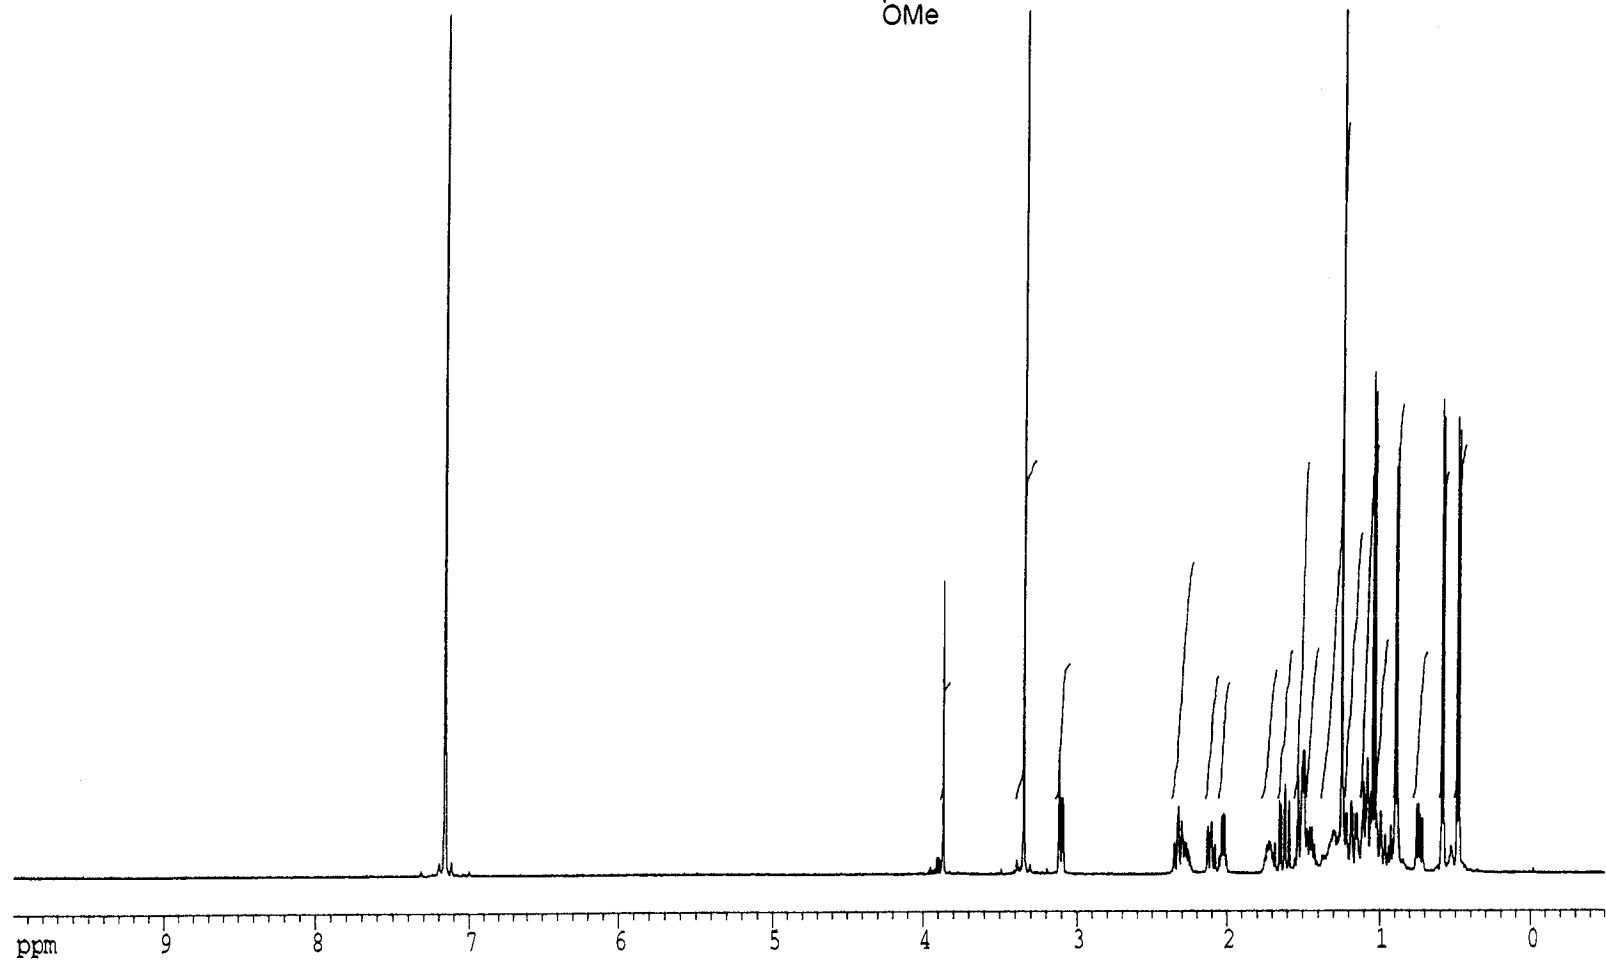

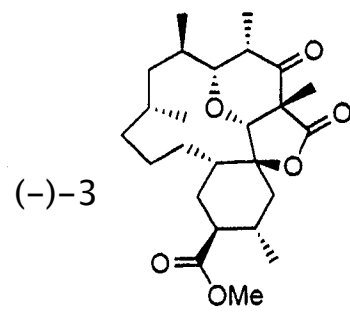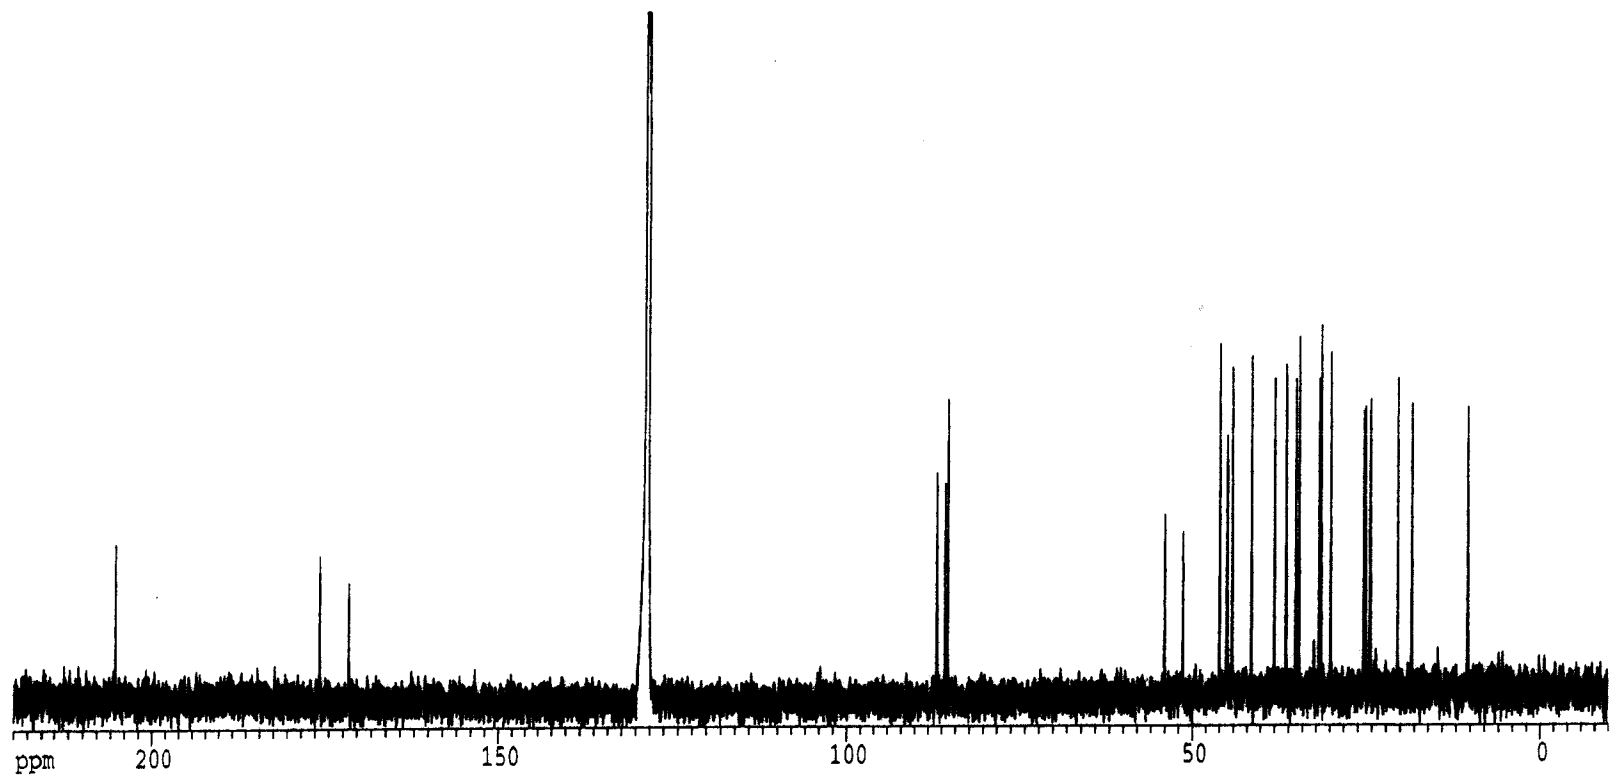

(-)-71

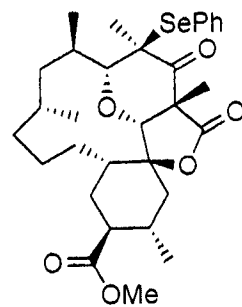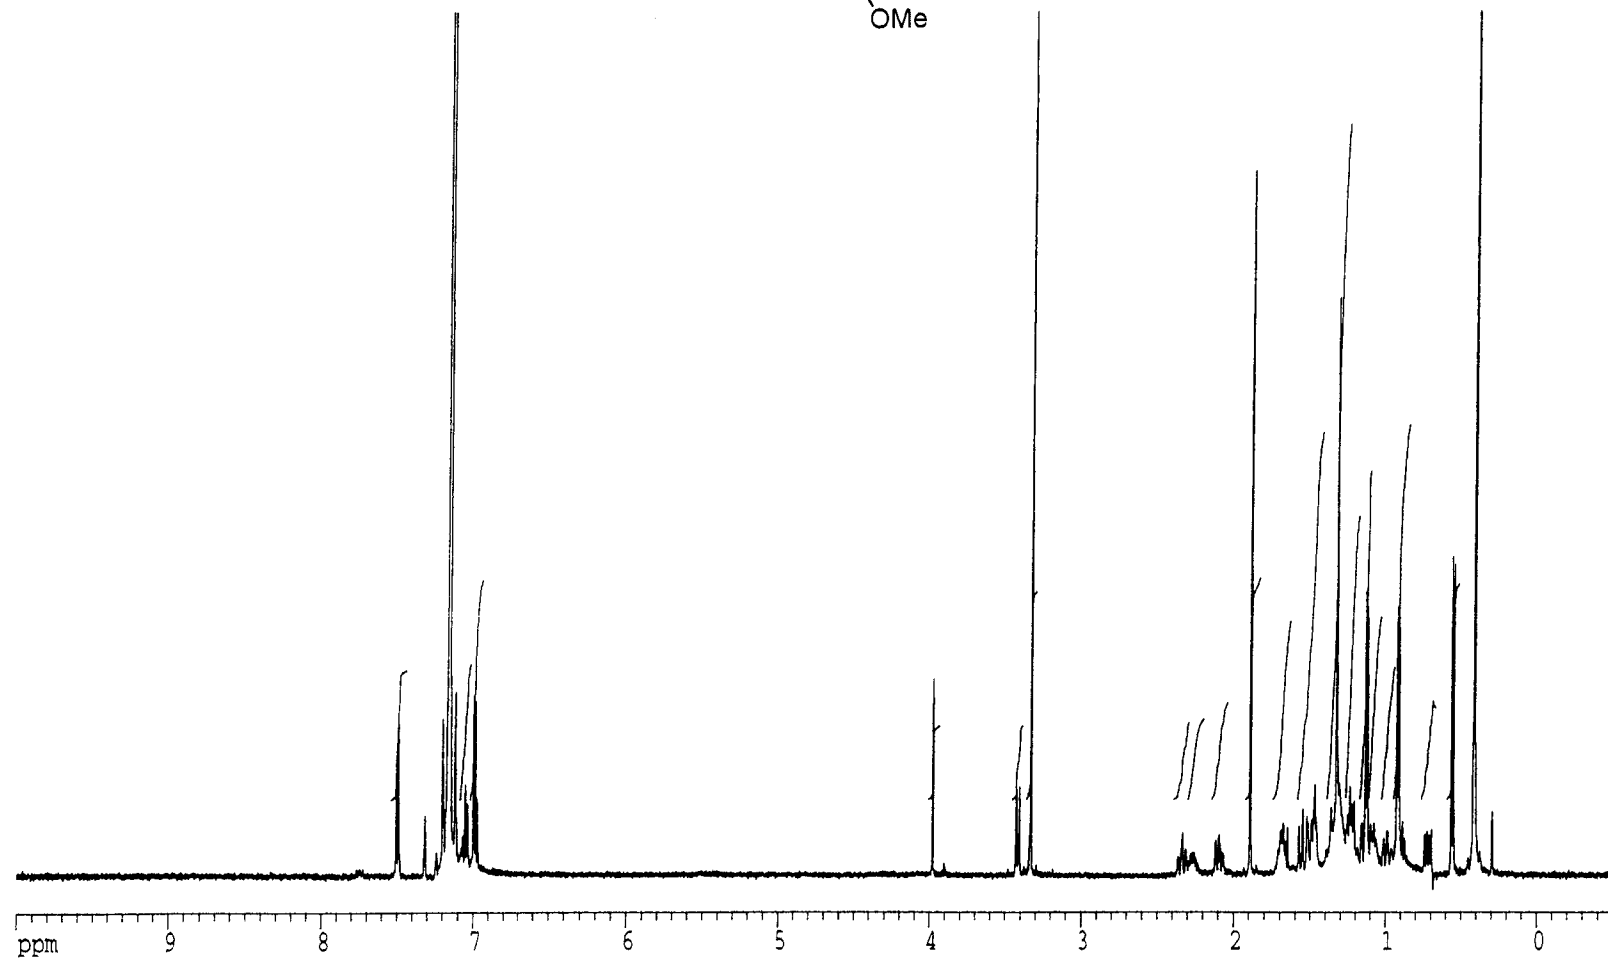

(-)-71

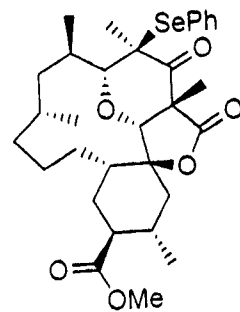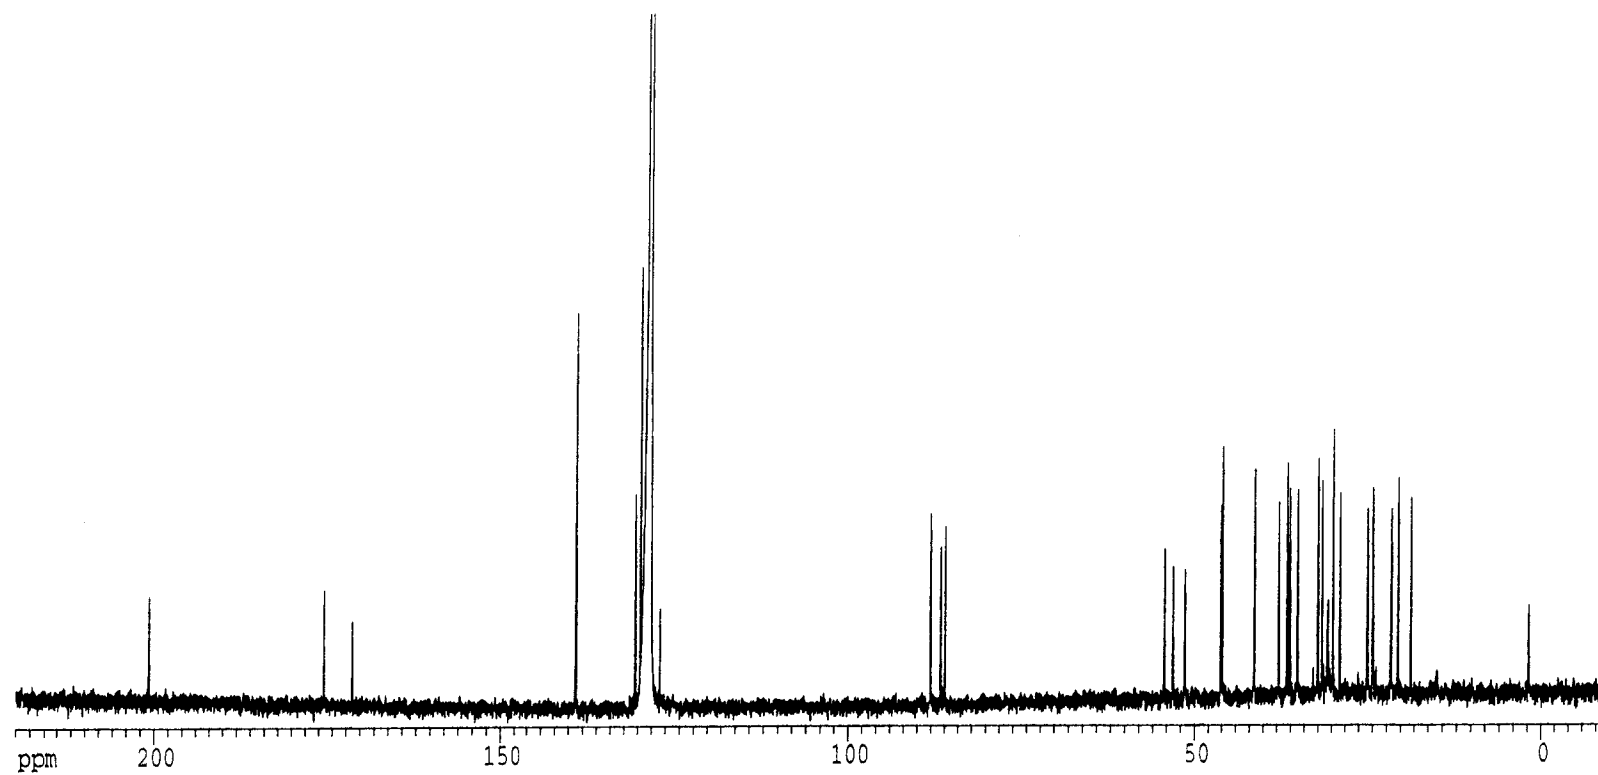

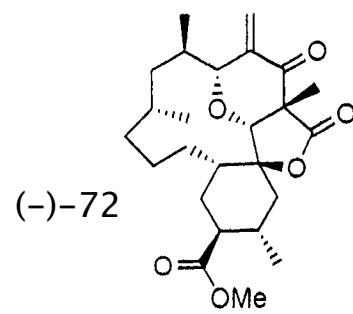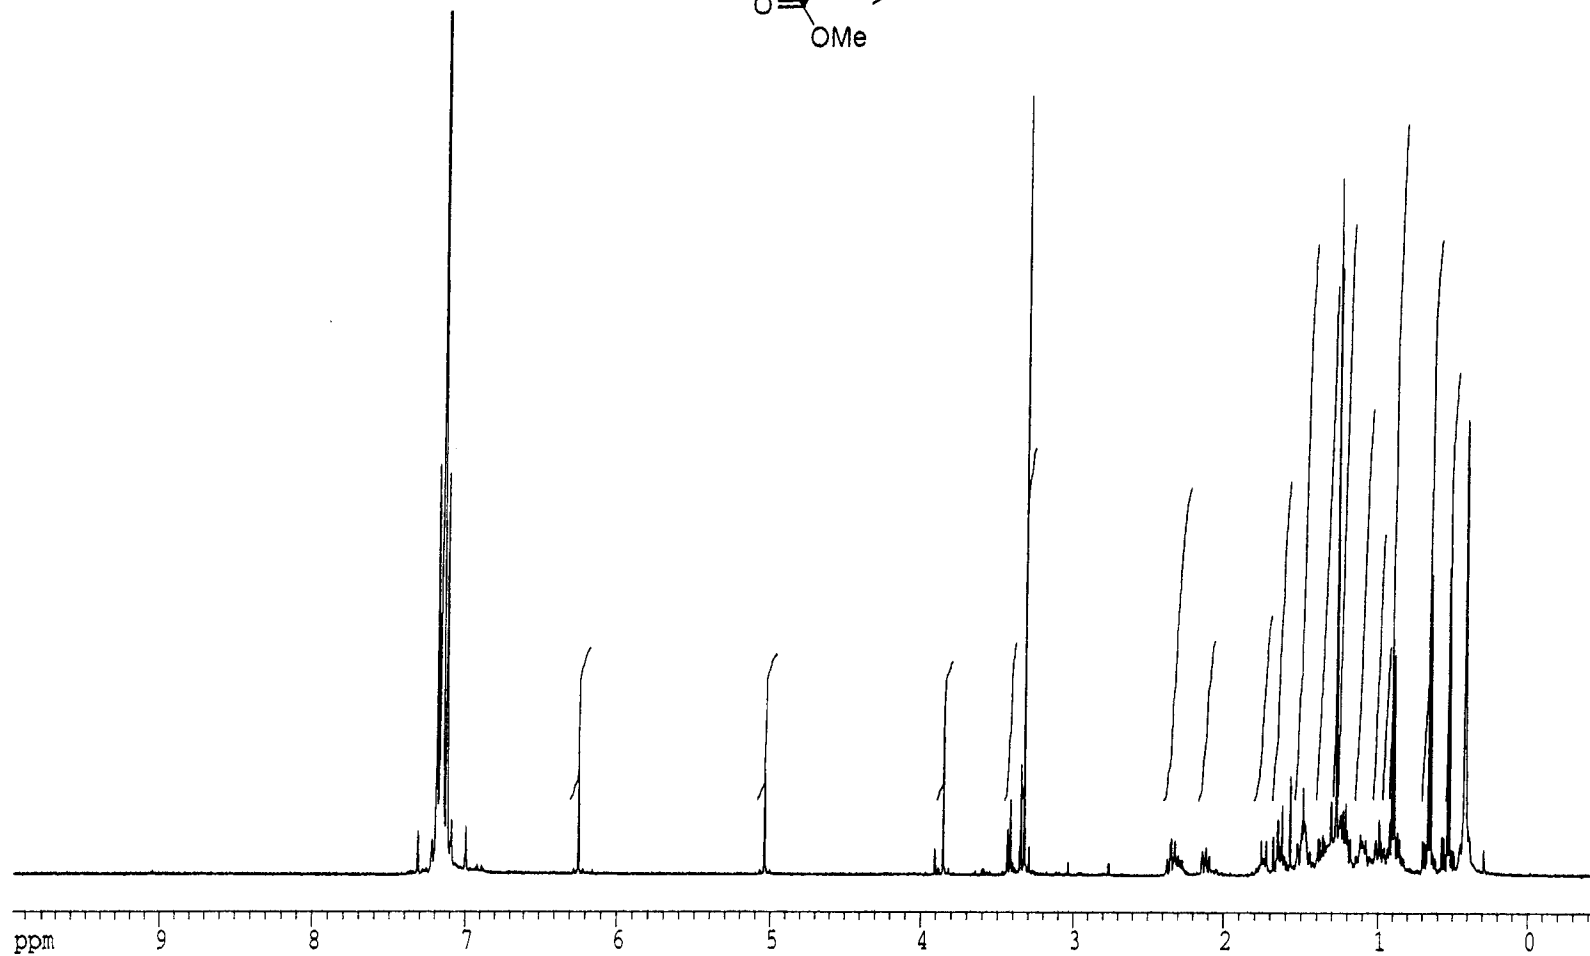

(-)-72

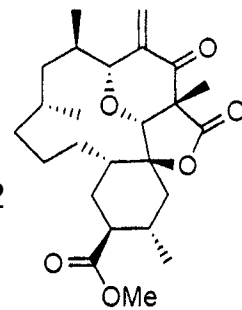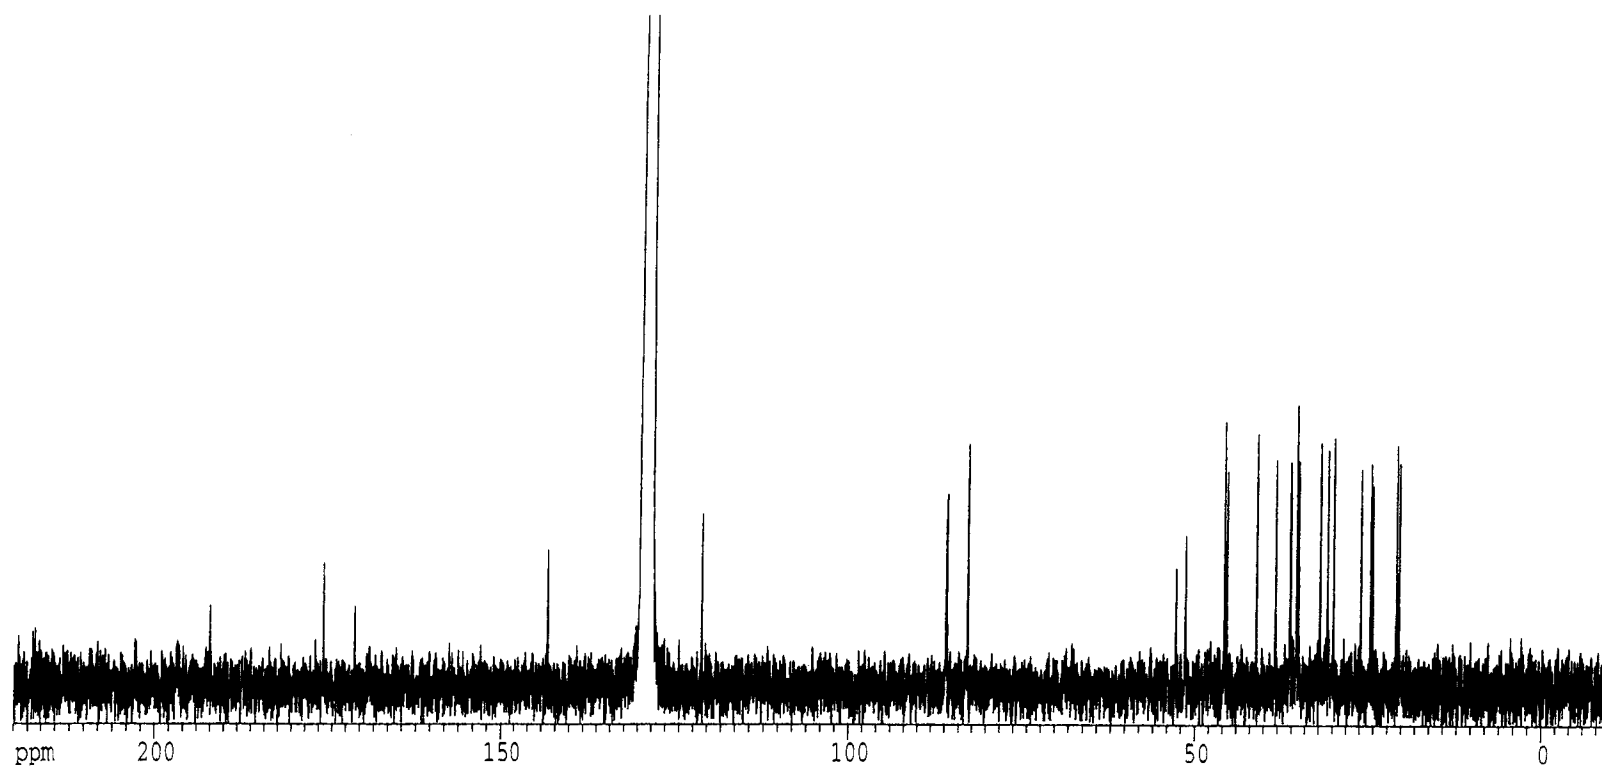

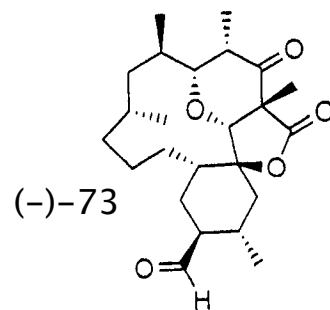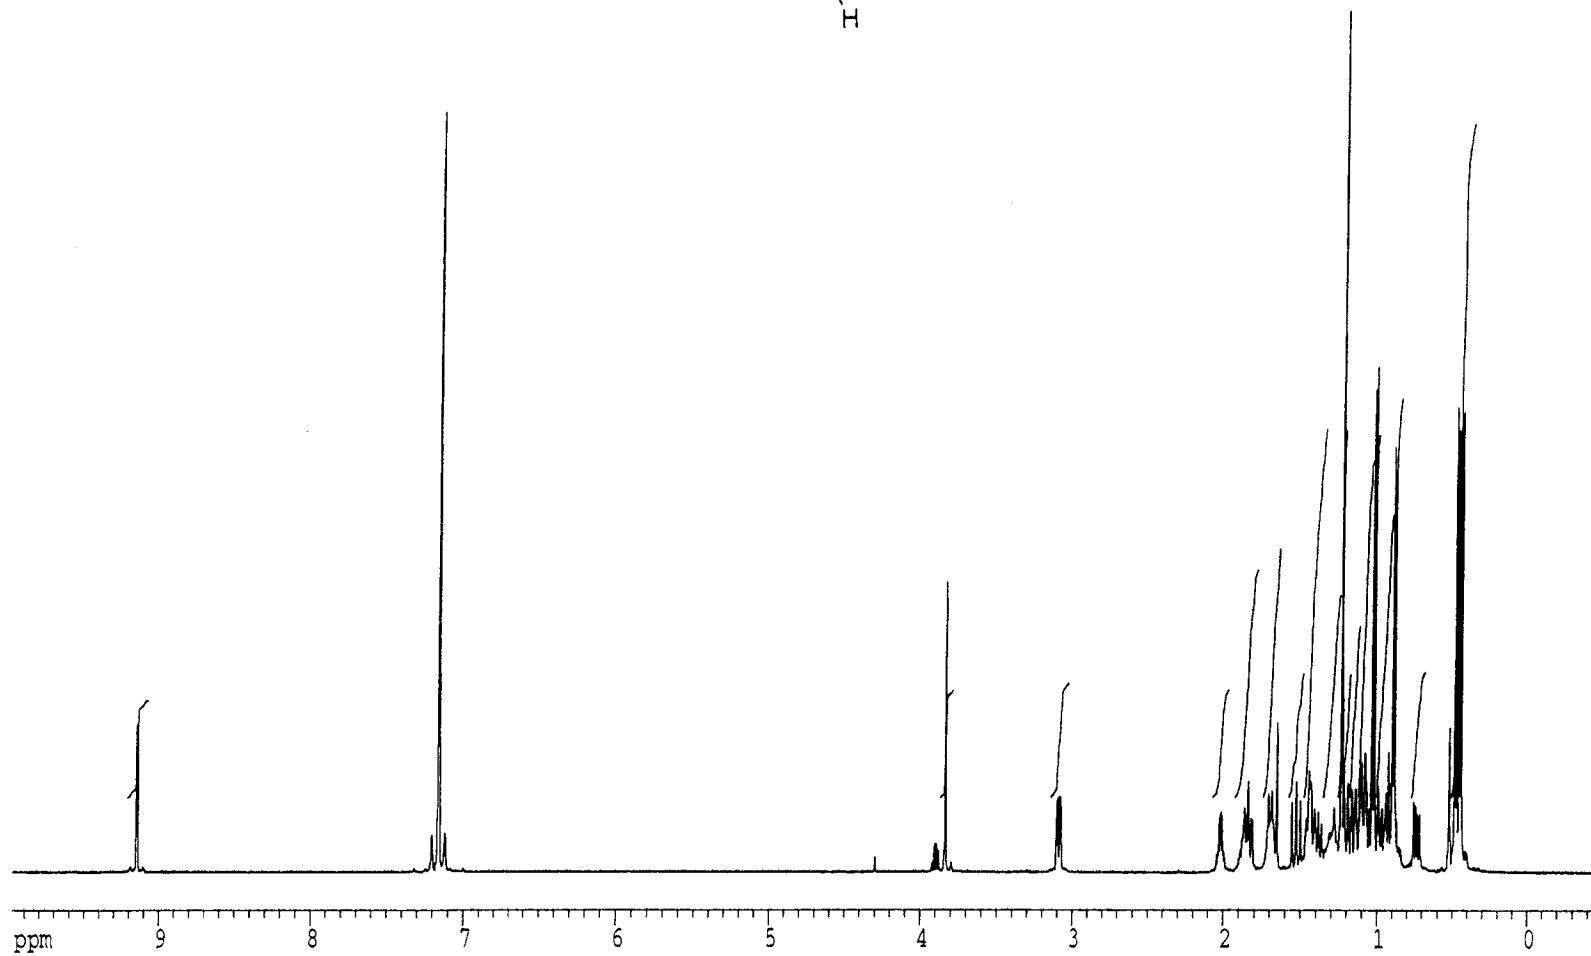

(-)-73

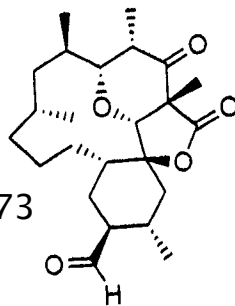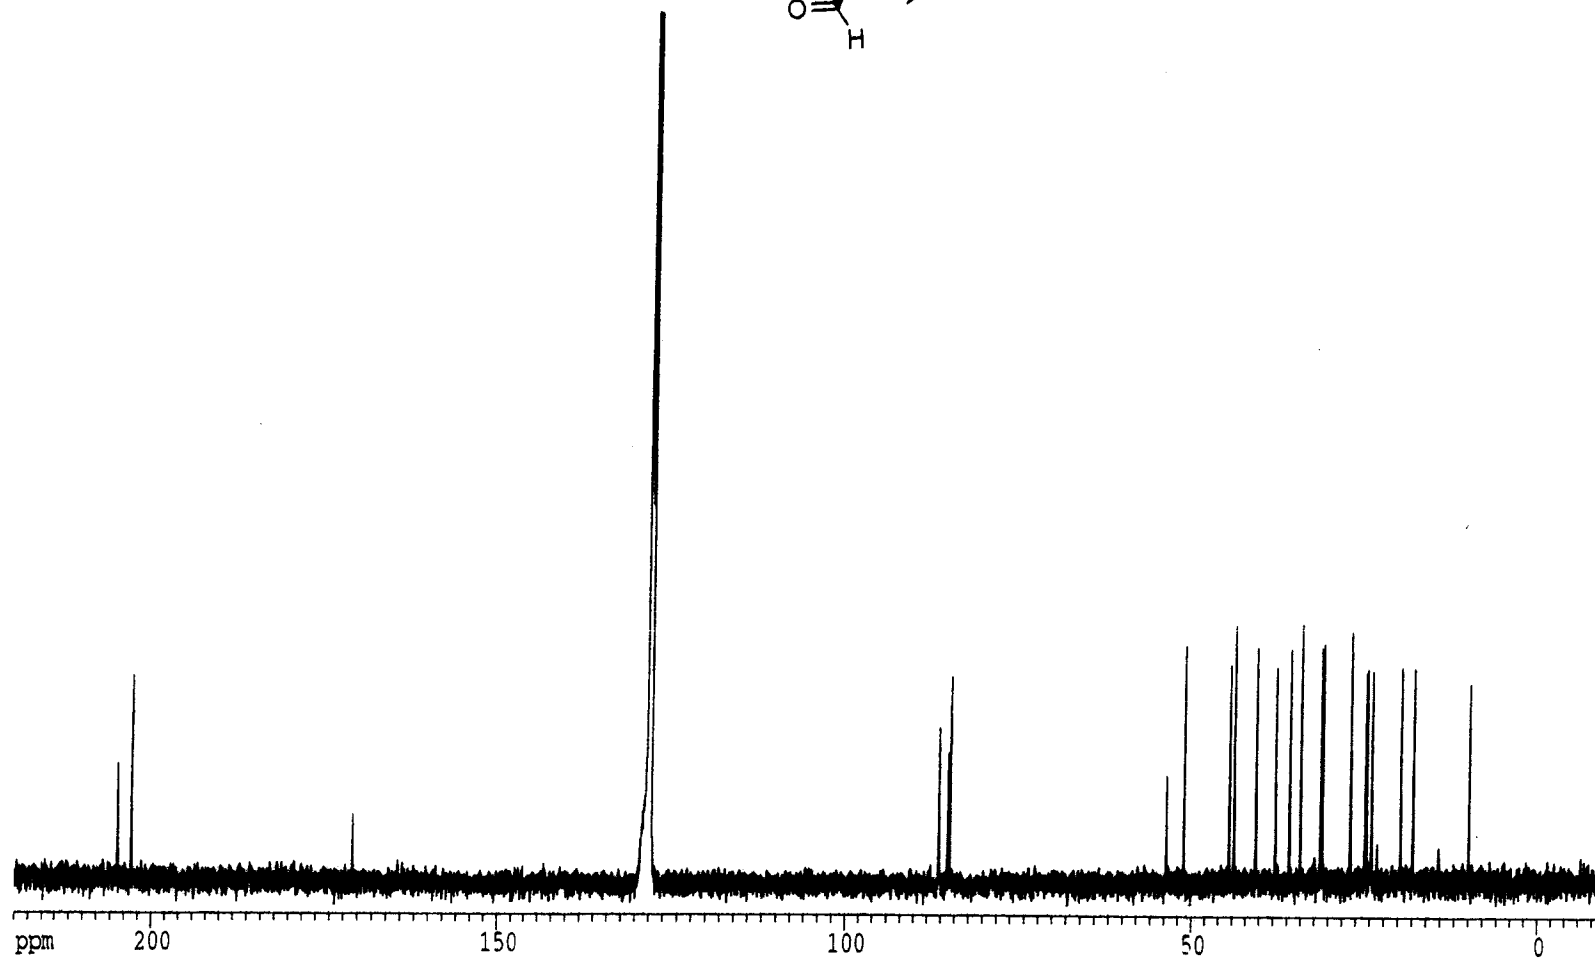

(-)-75

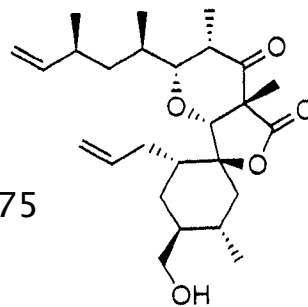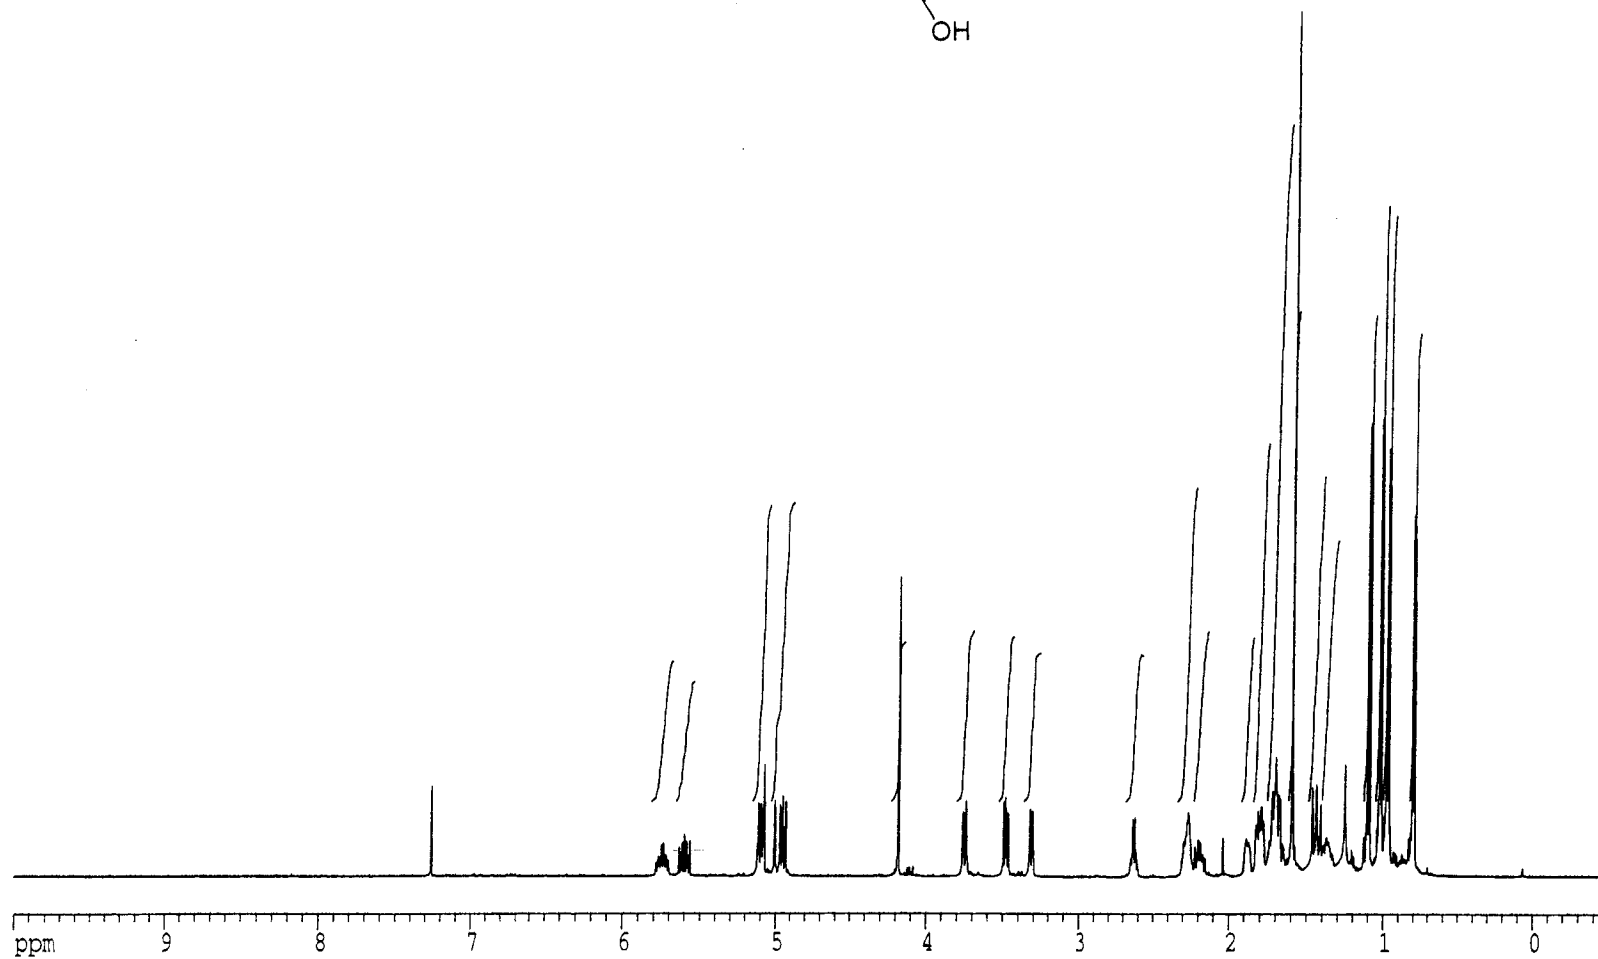

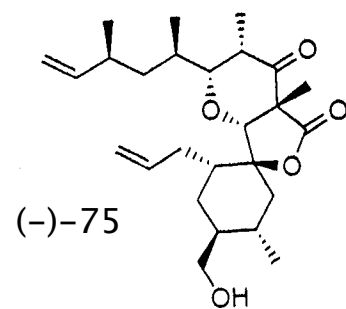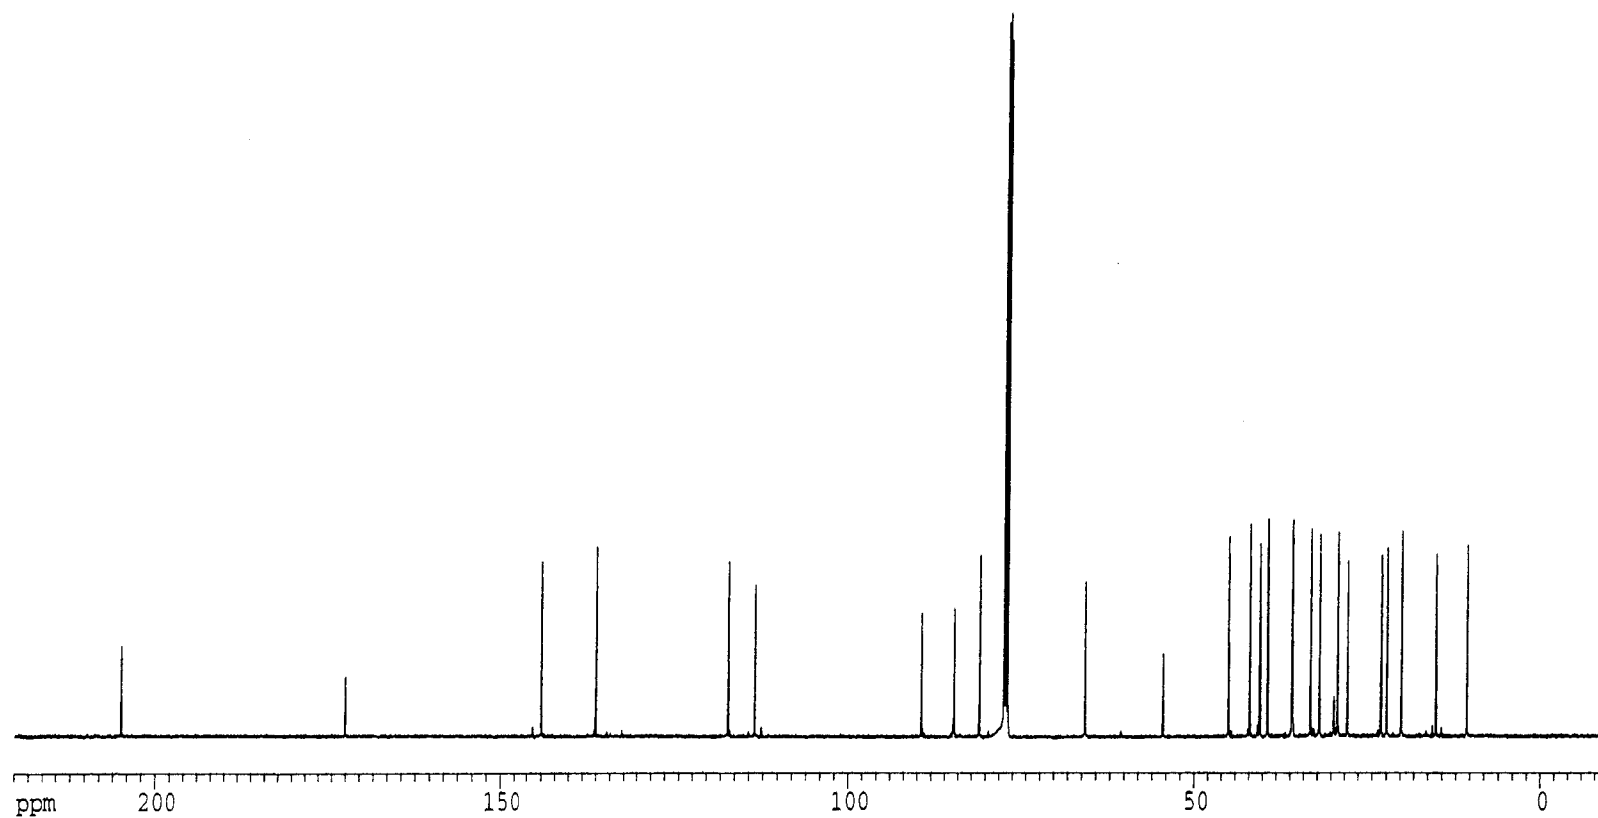

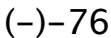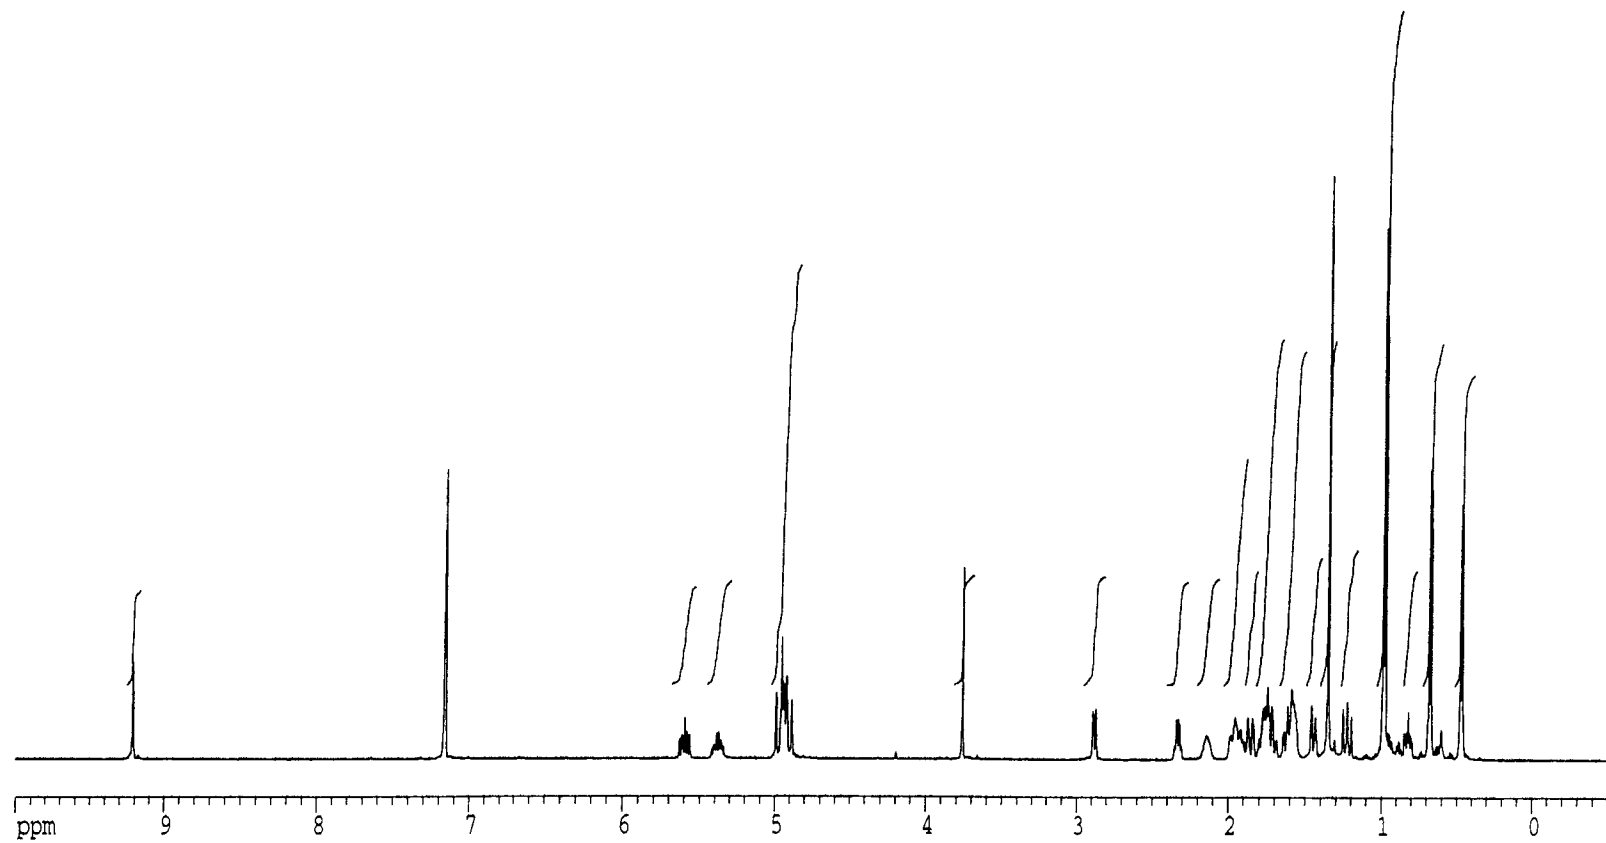

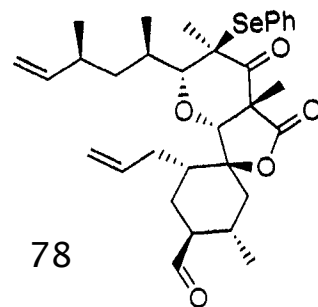

78

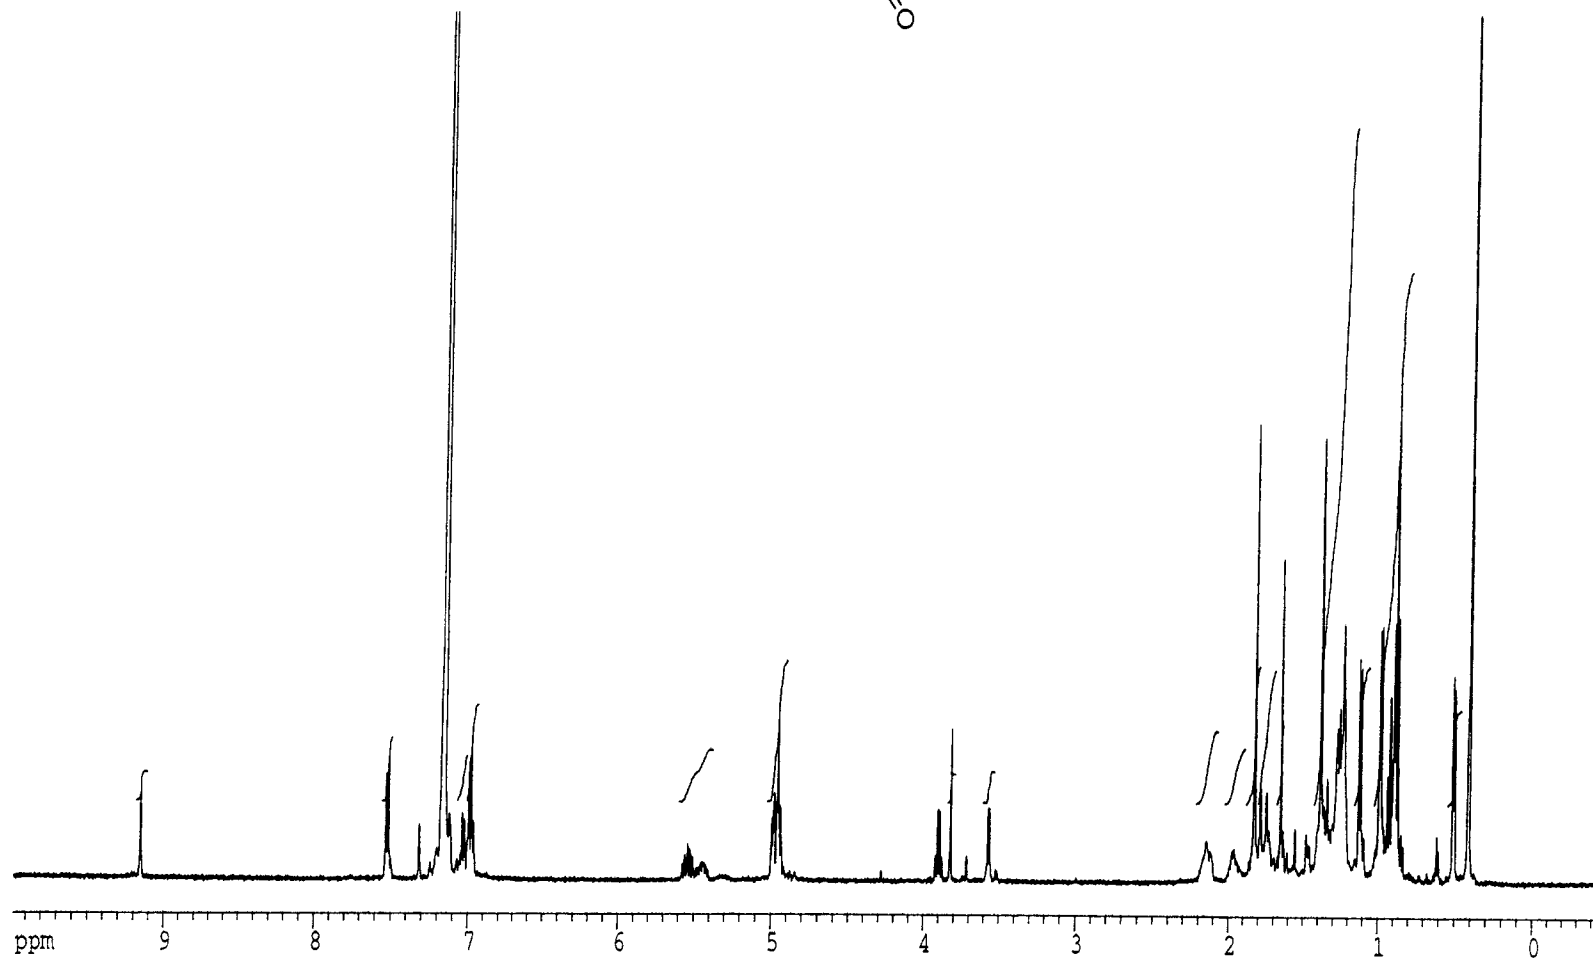

(-)-81

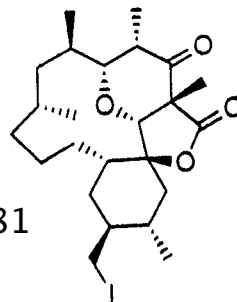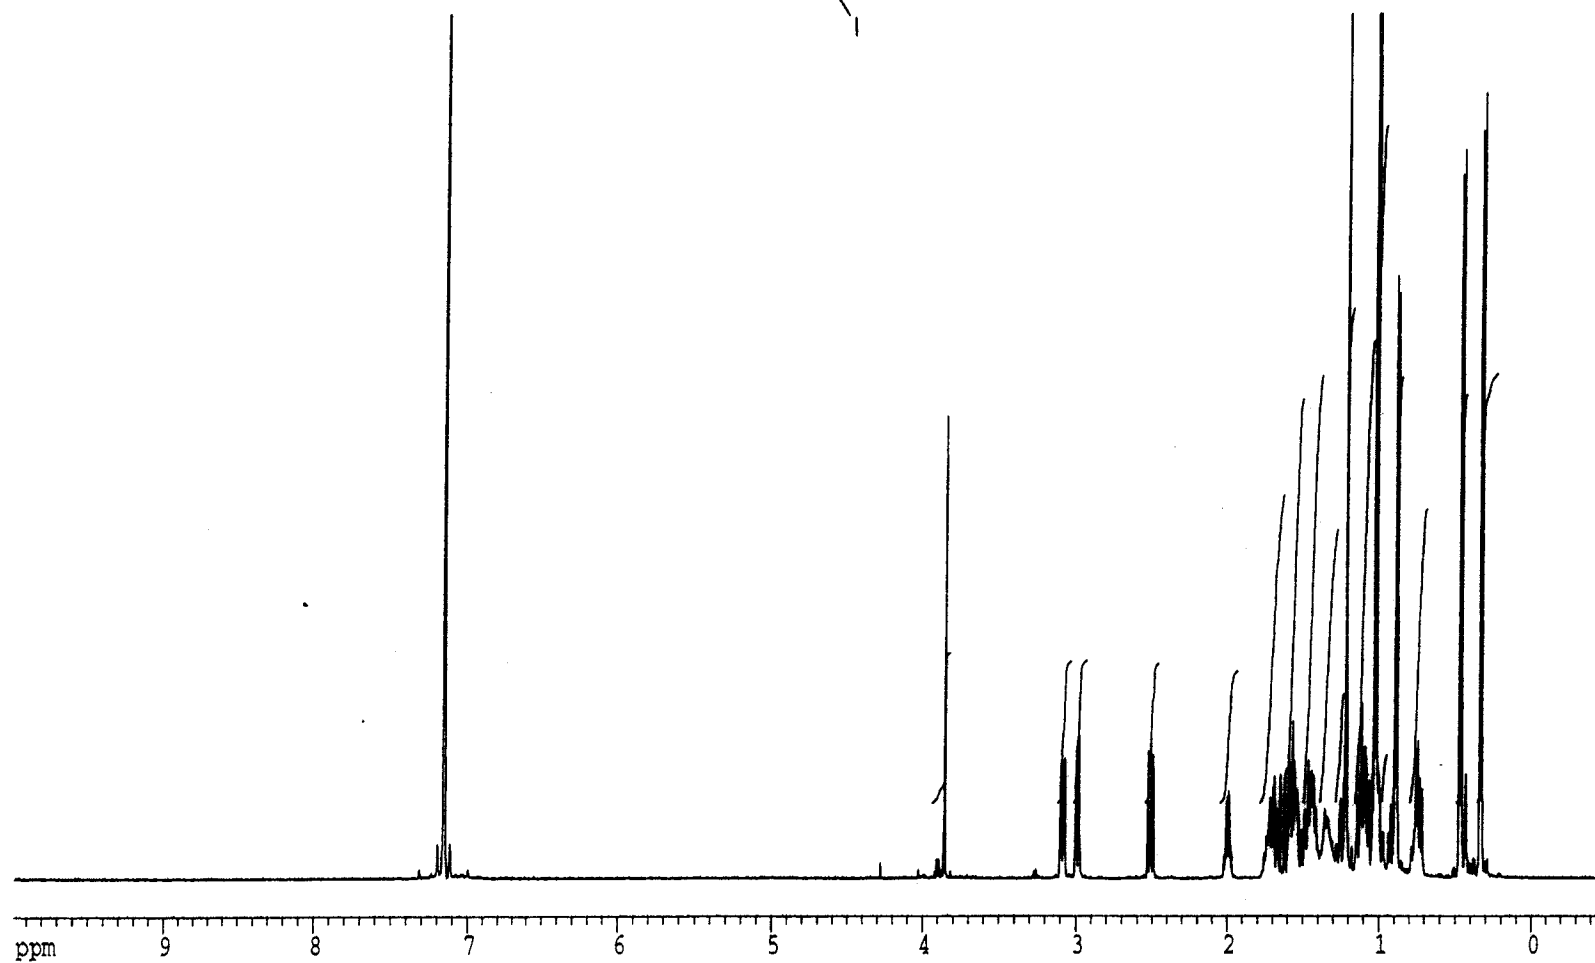

(-)-81

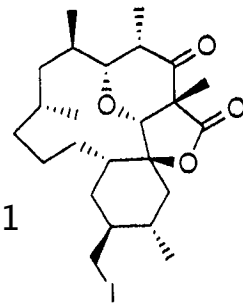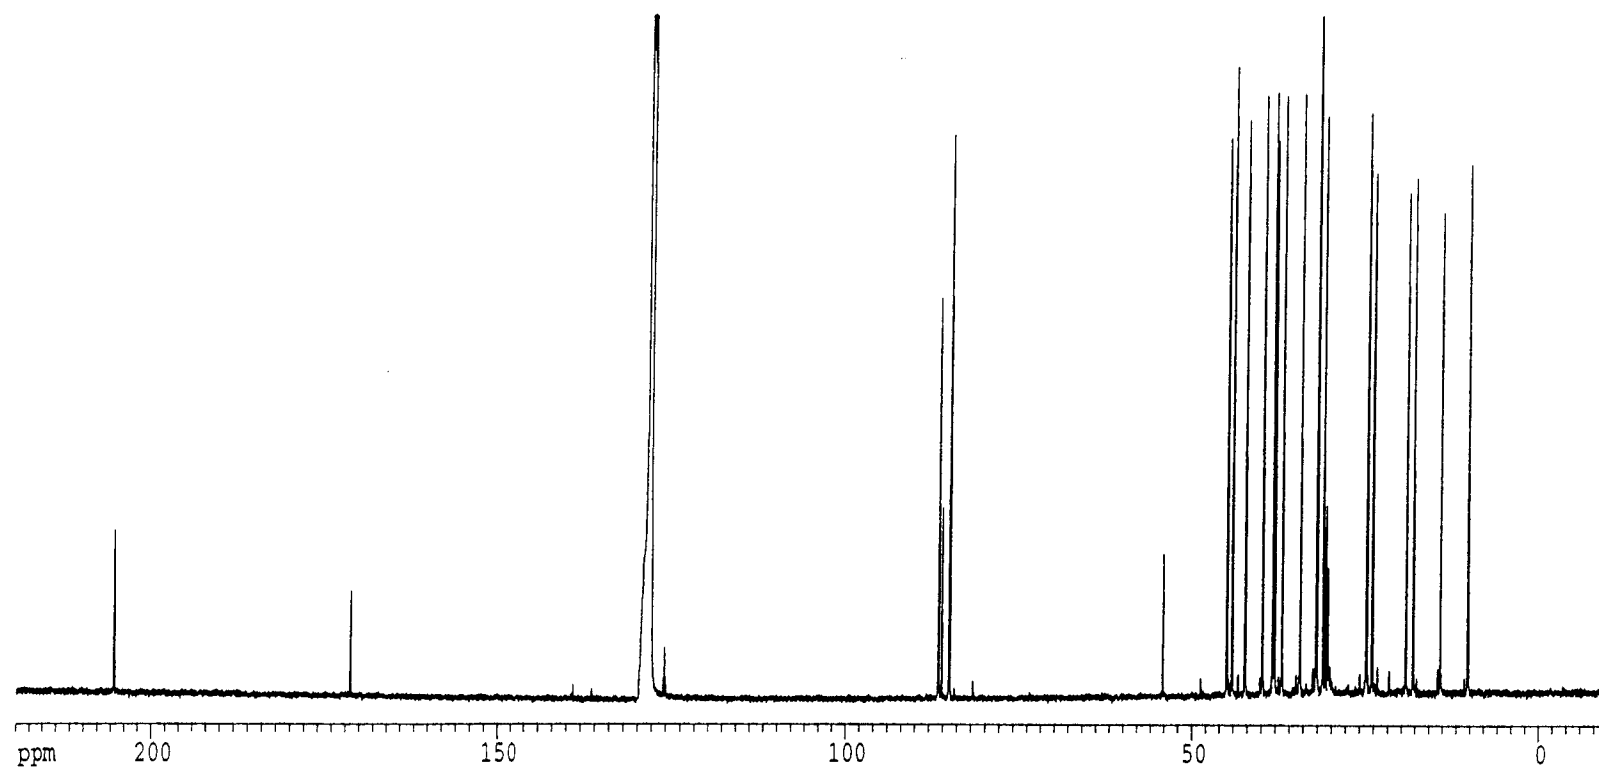

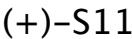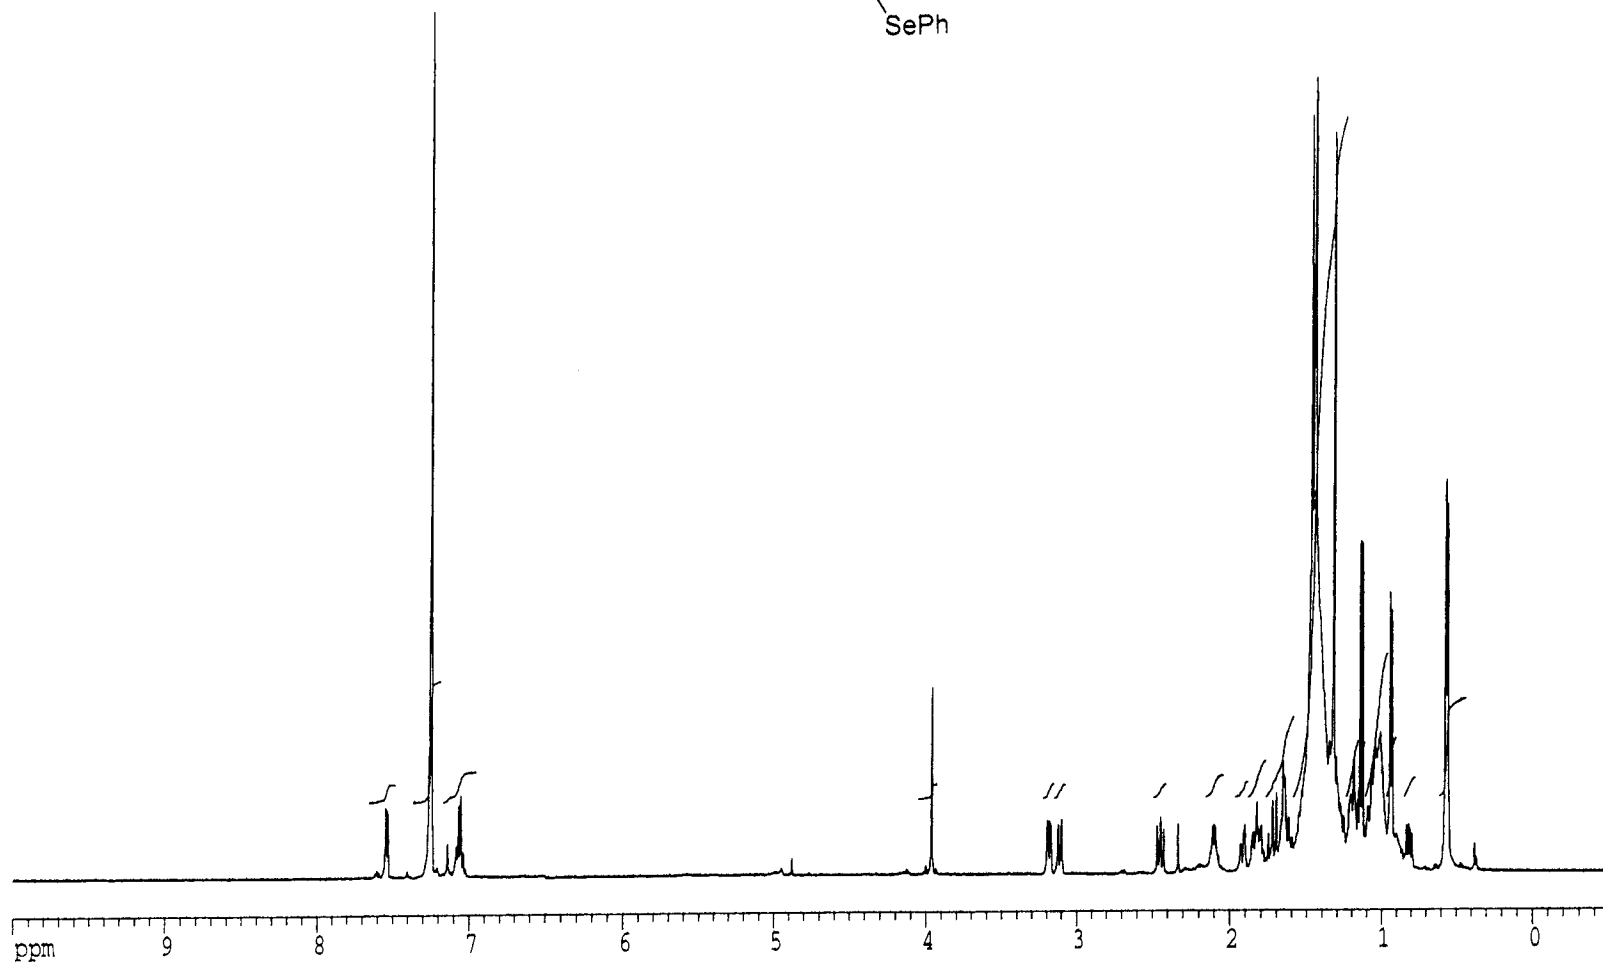

(+)-S11

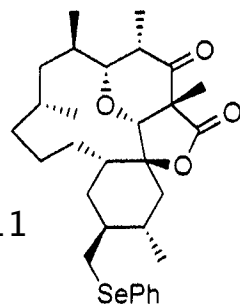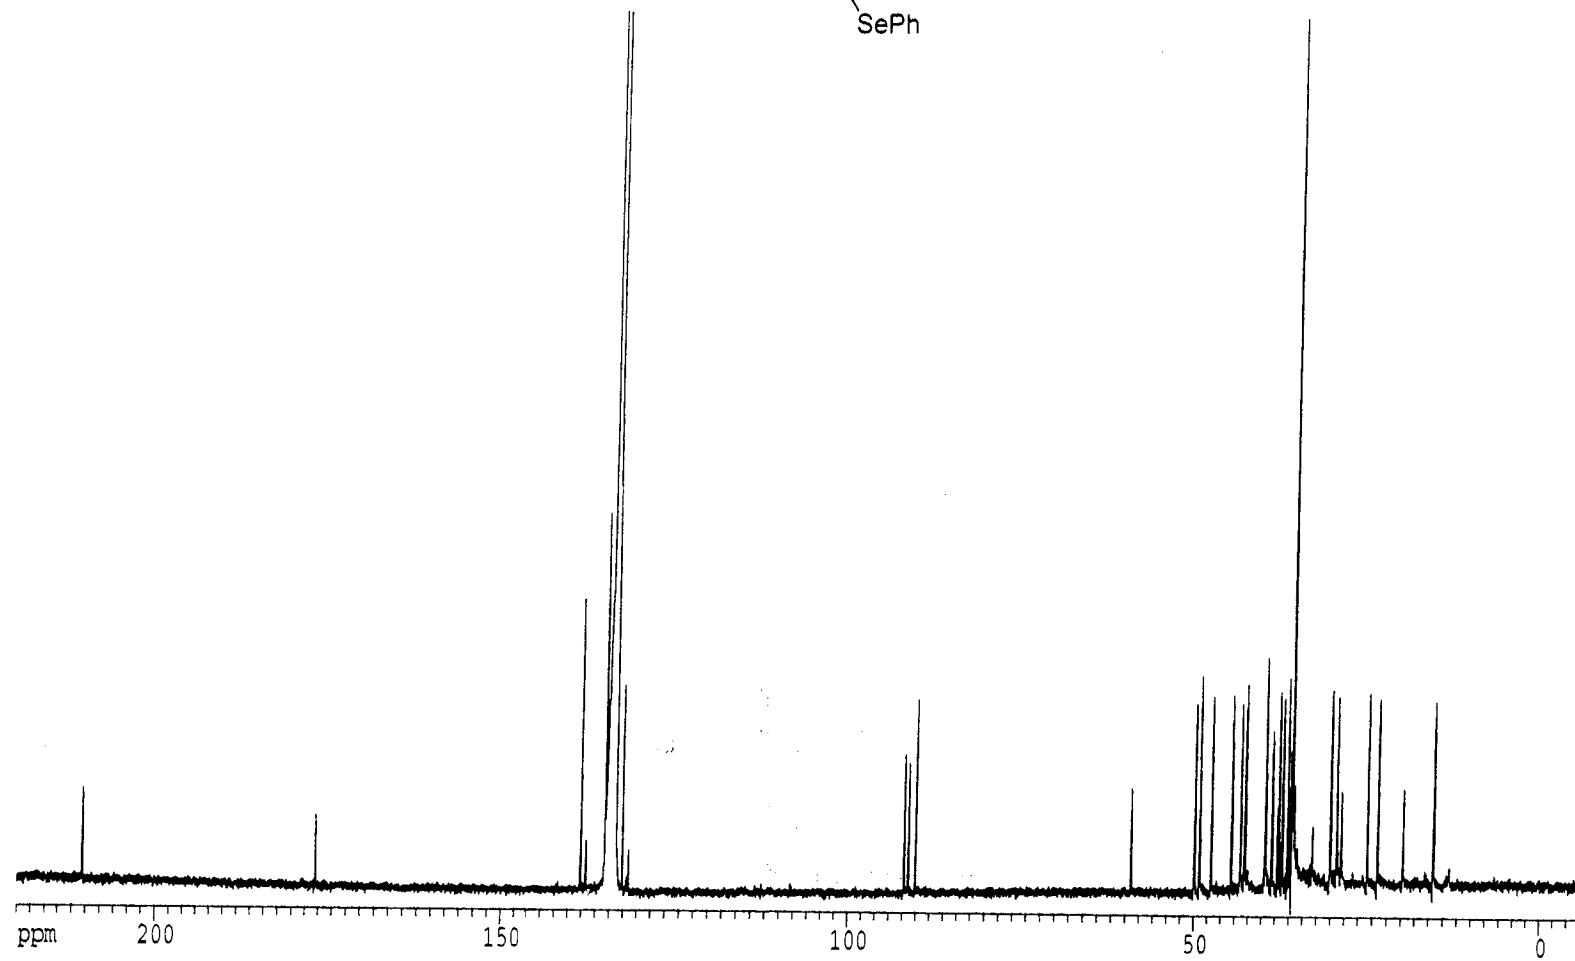

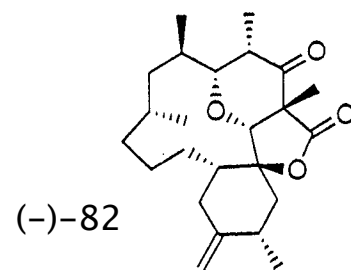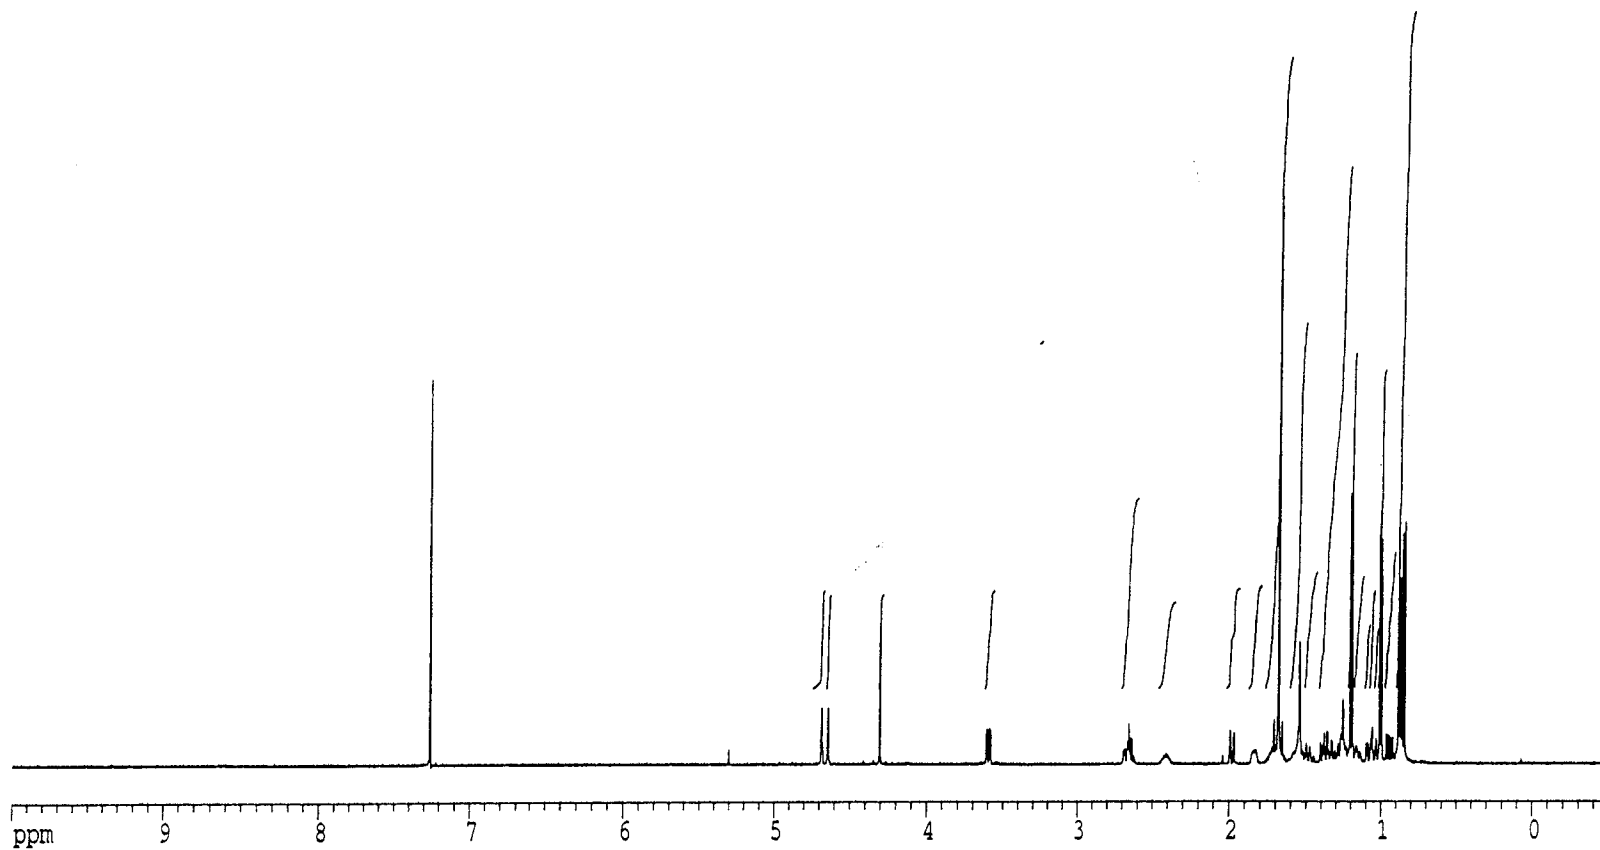

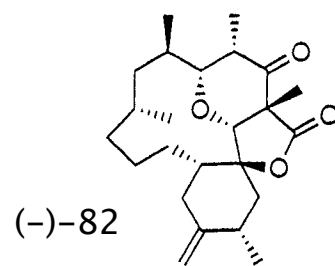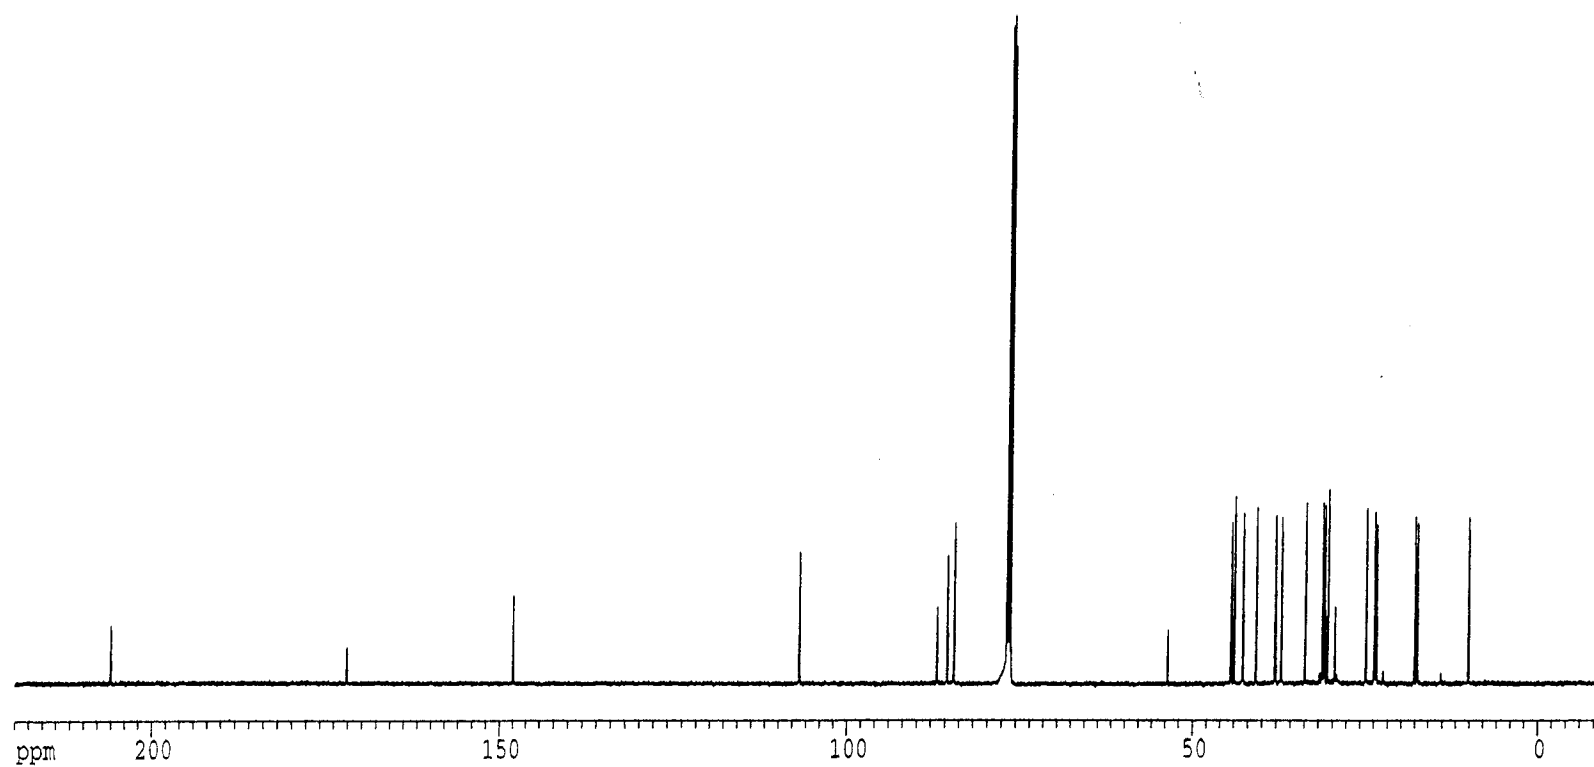

(-)-83

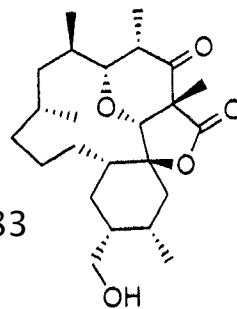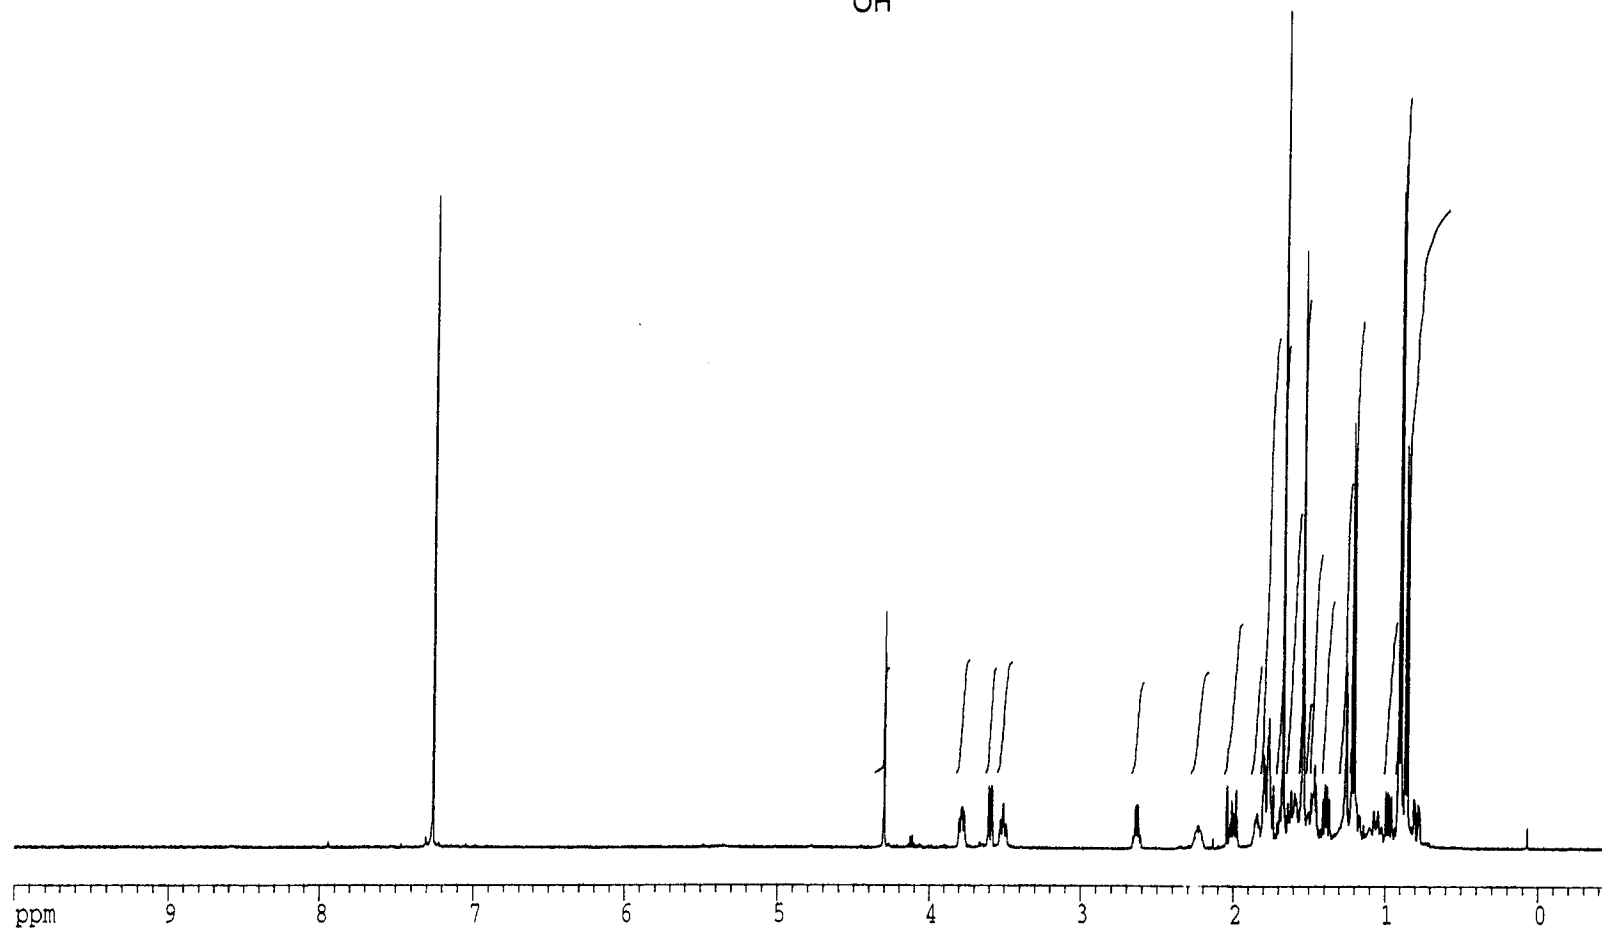

(-)-83

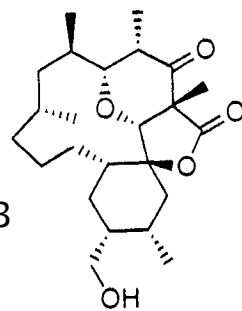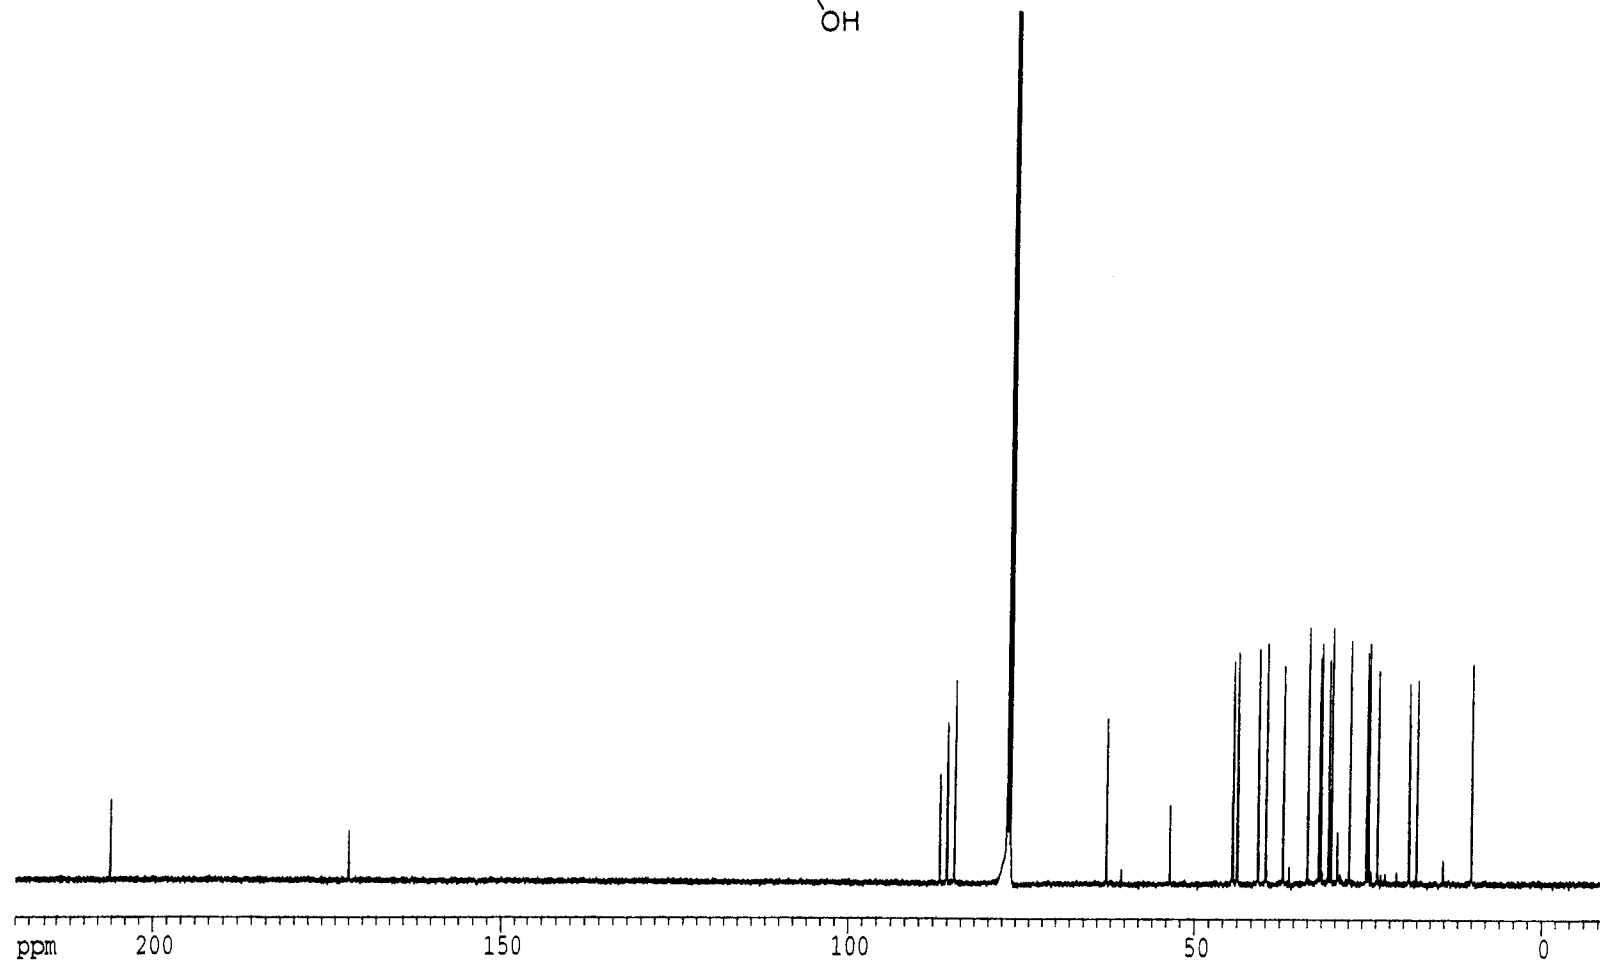

(-)-86

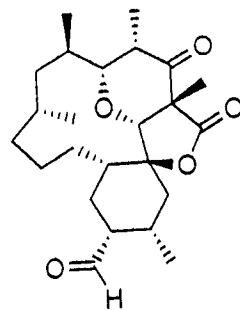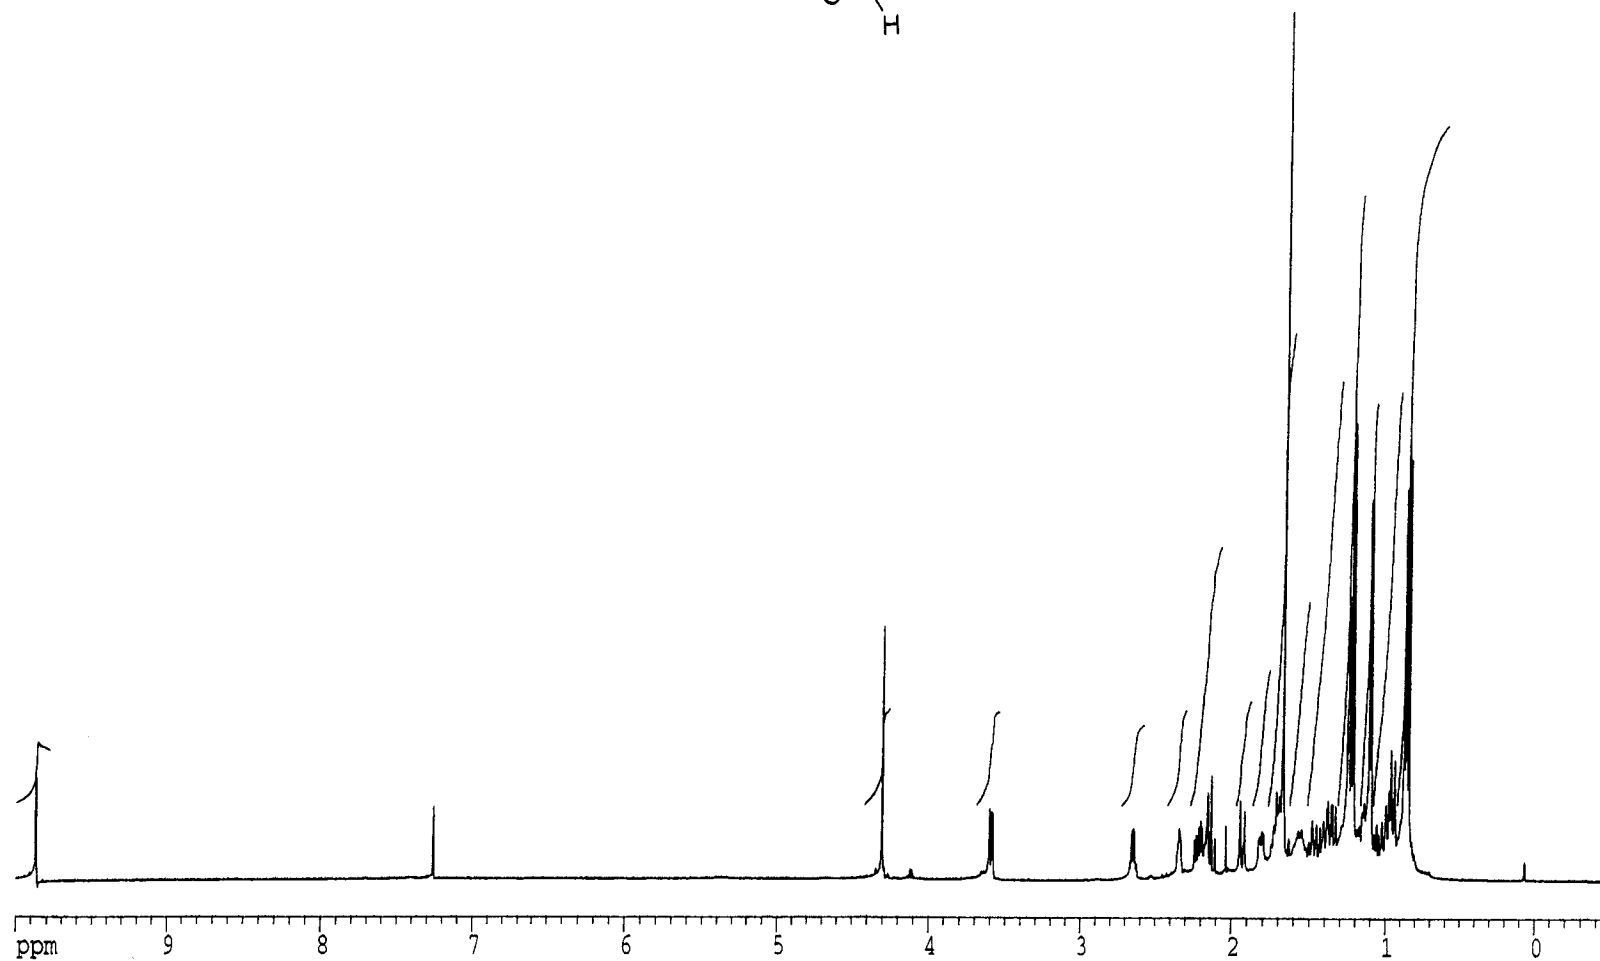

(-)-86

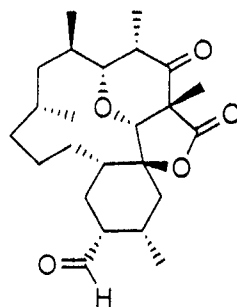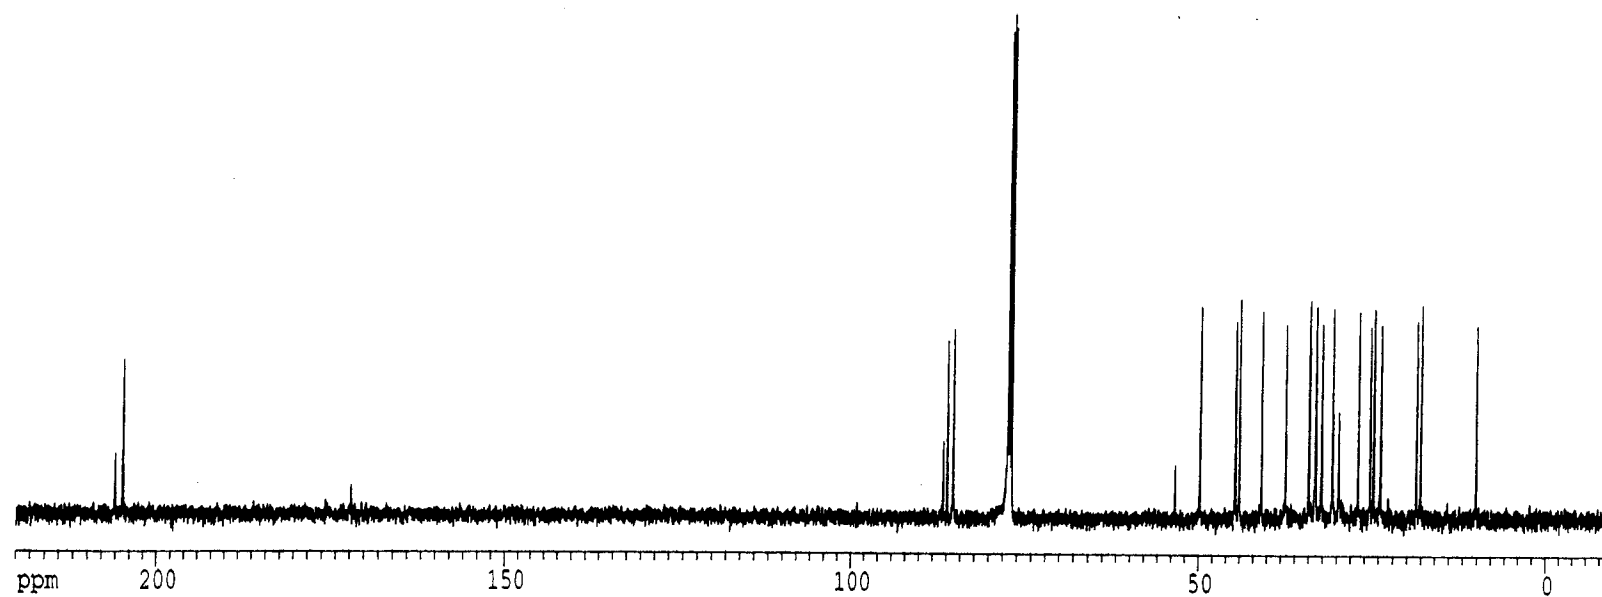

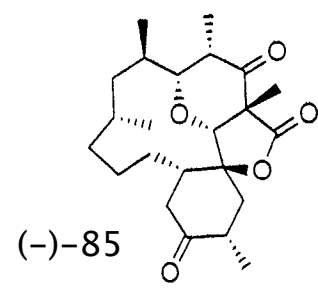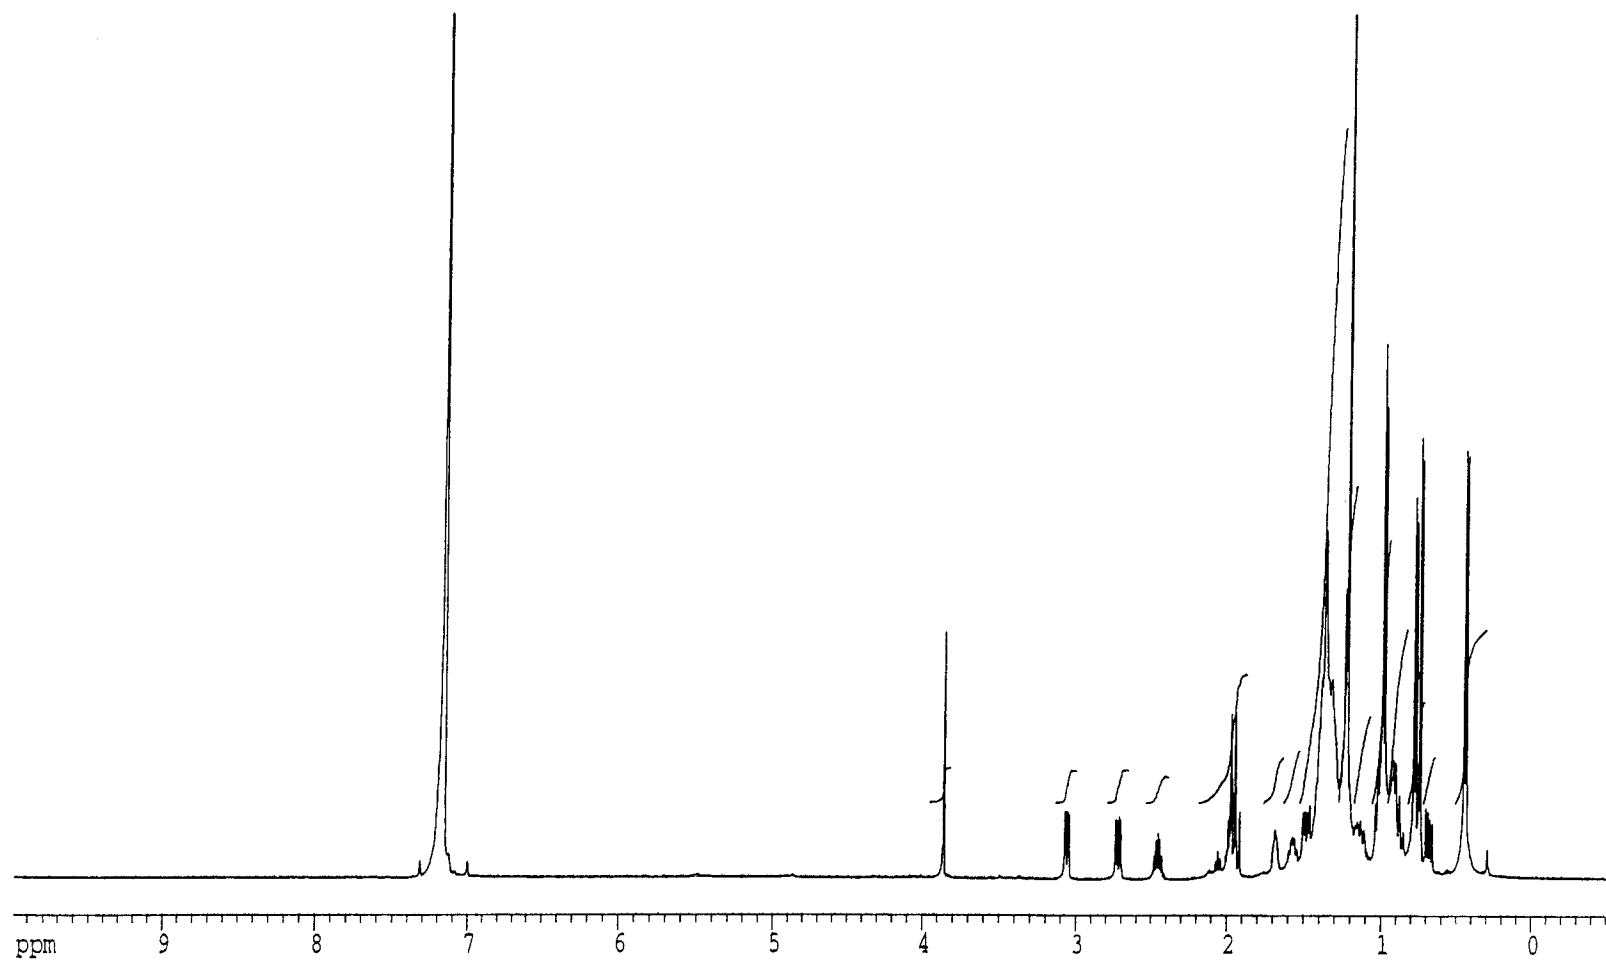

(-)-85

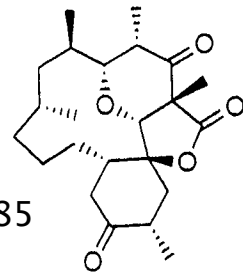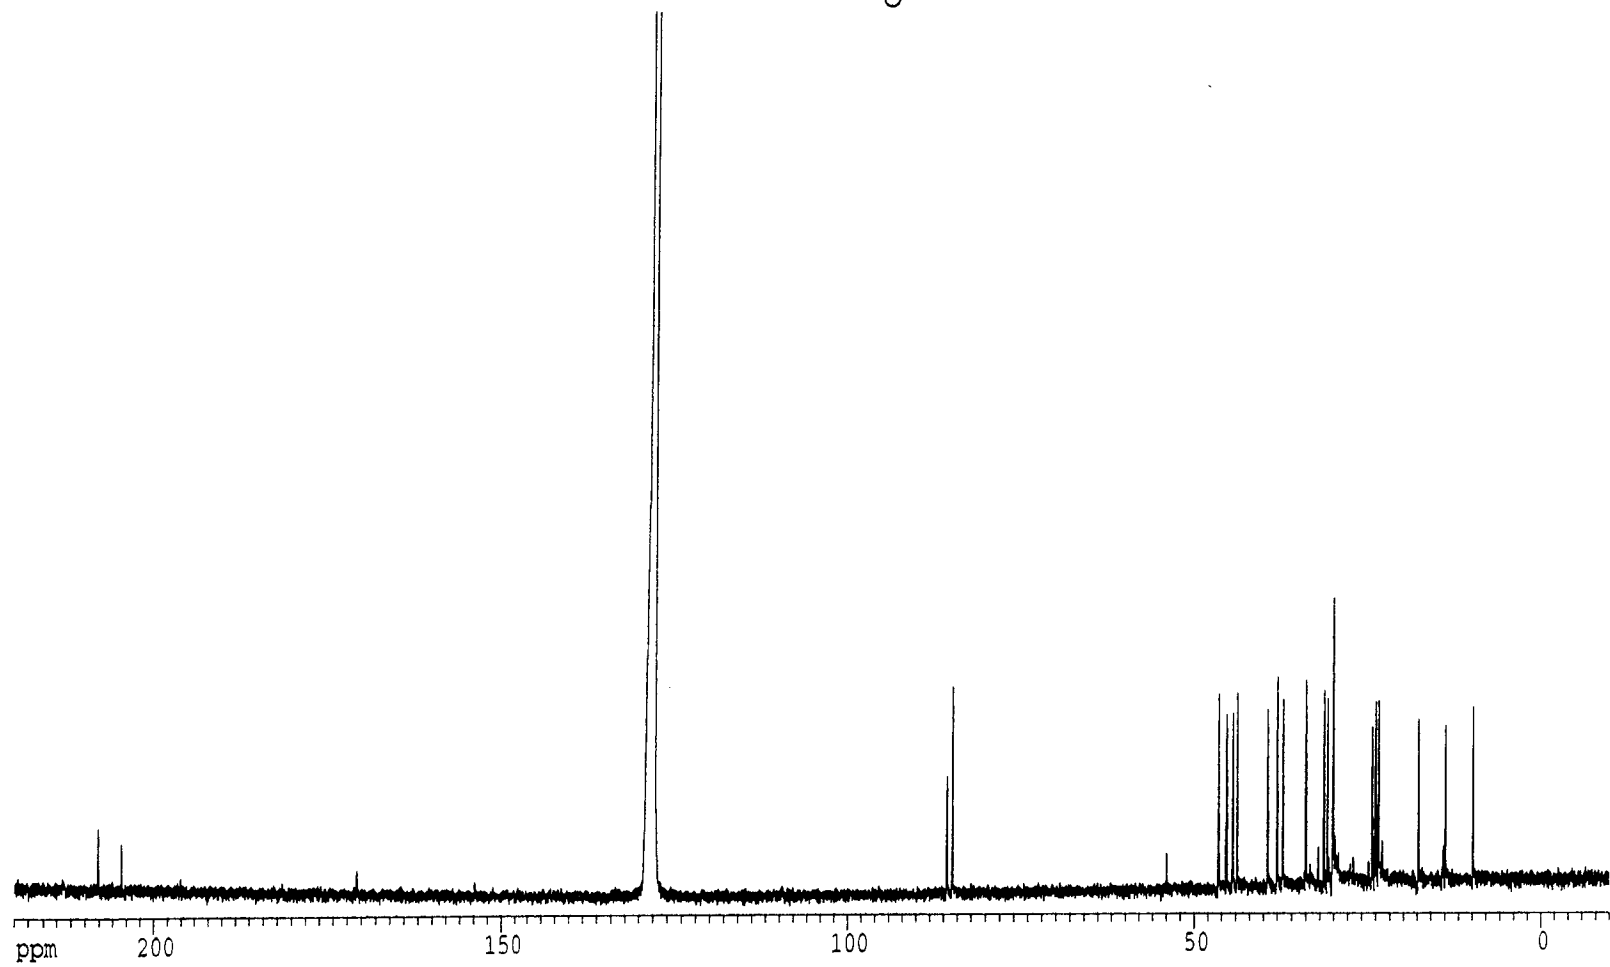

(-)-87

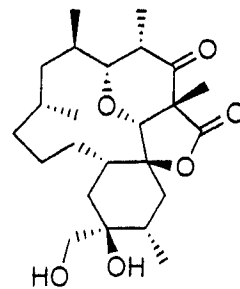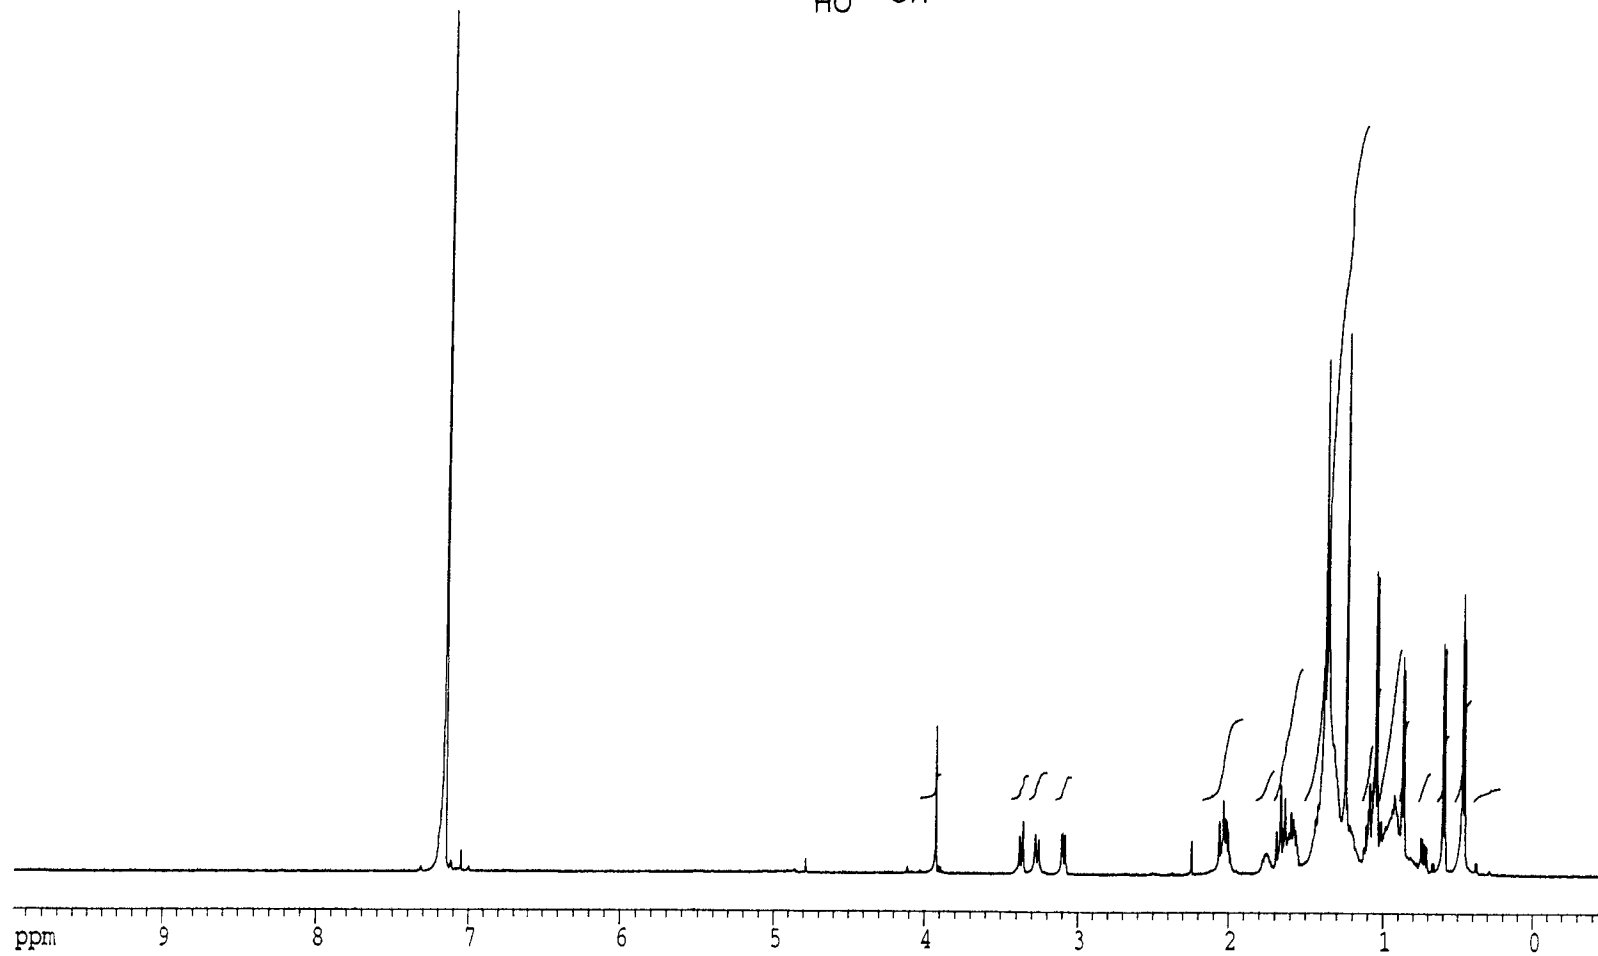

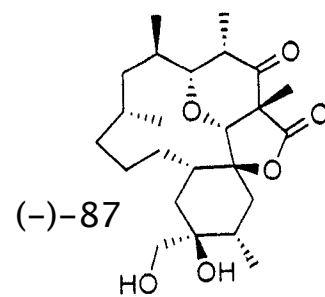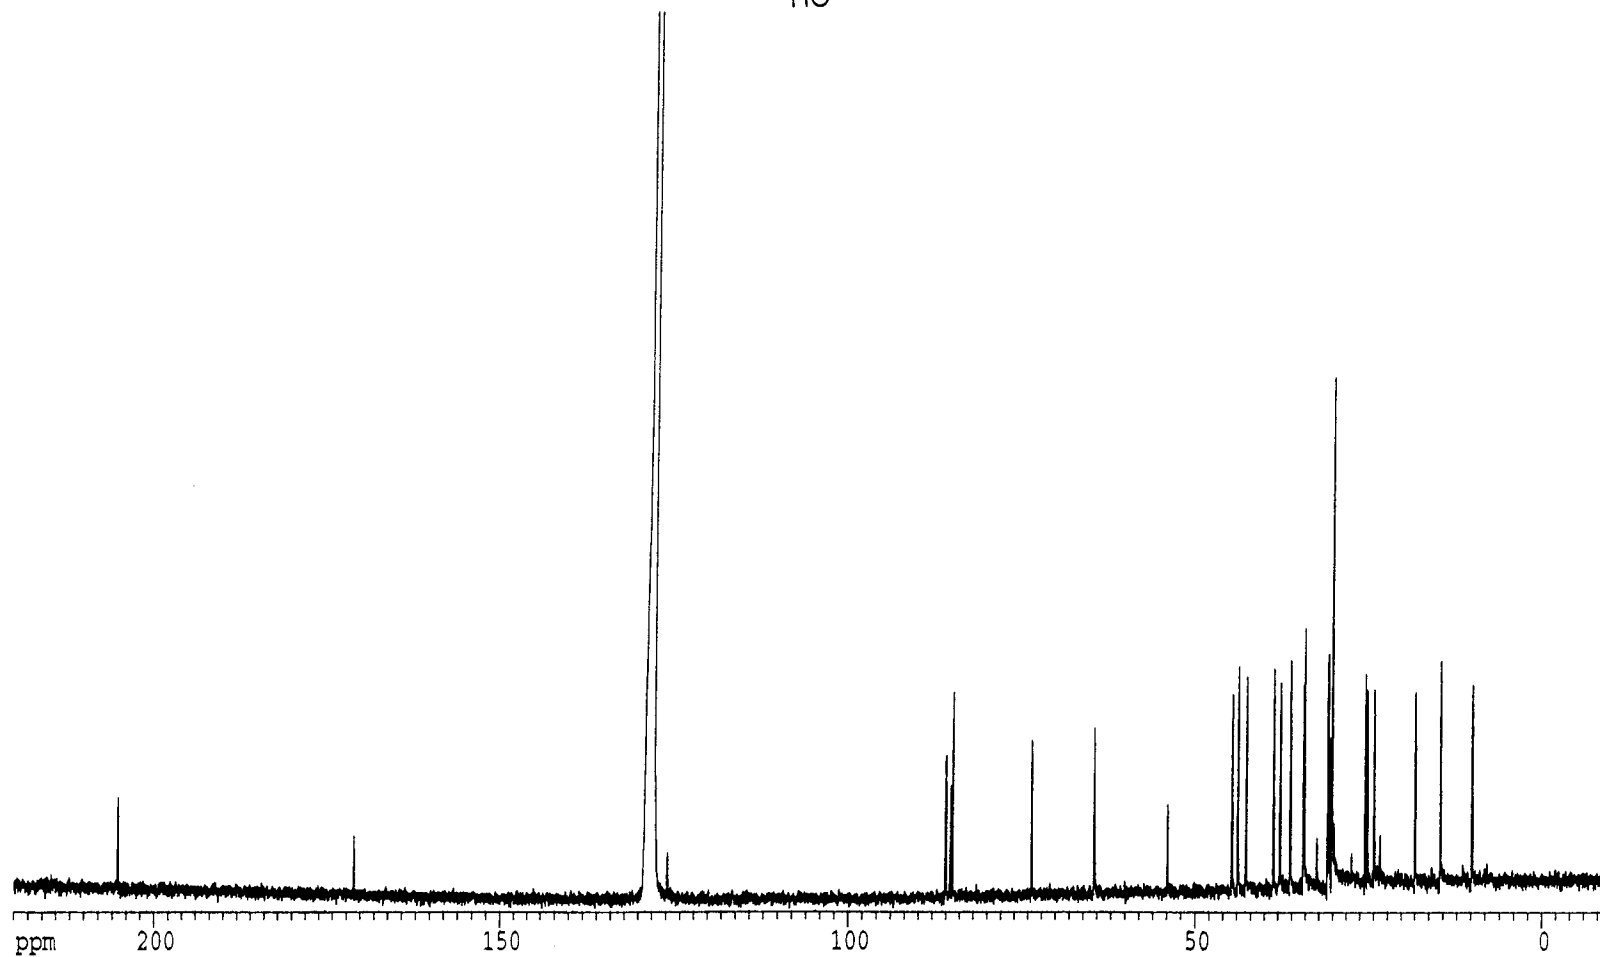

(-)-88

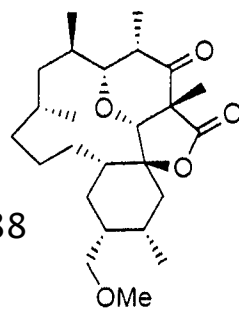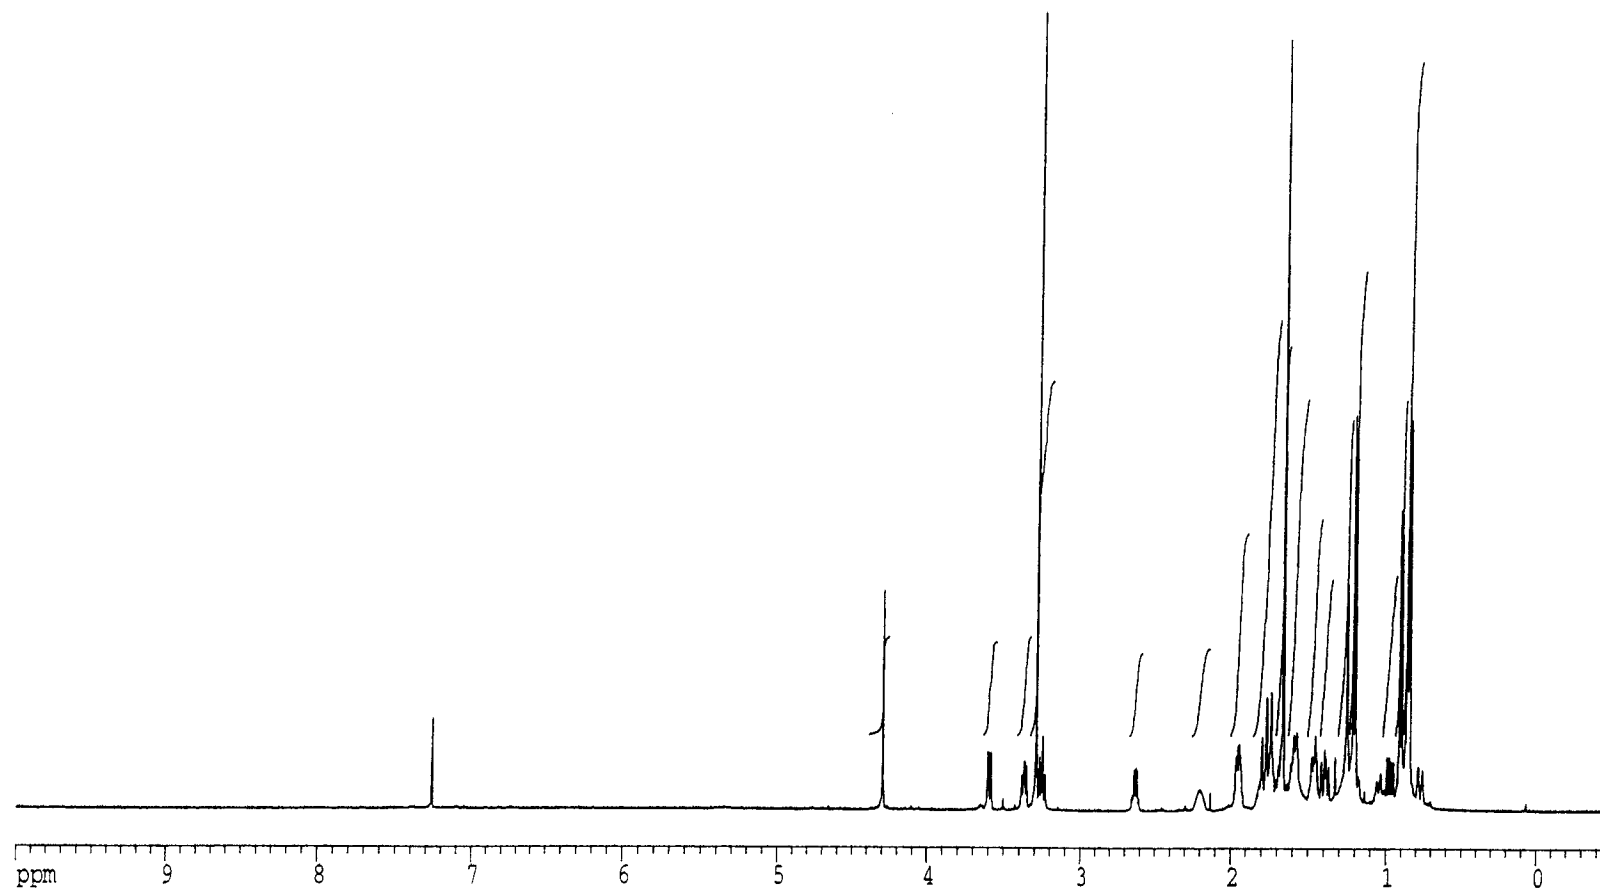

(-)-88

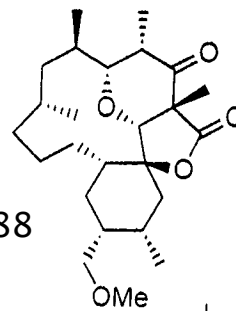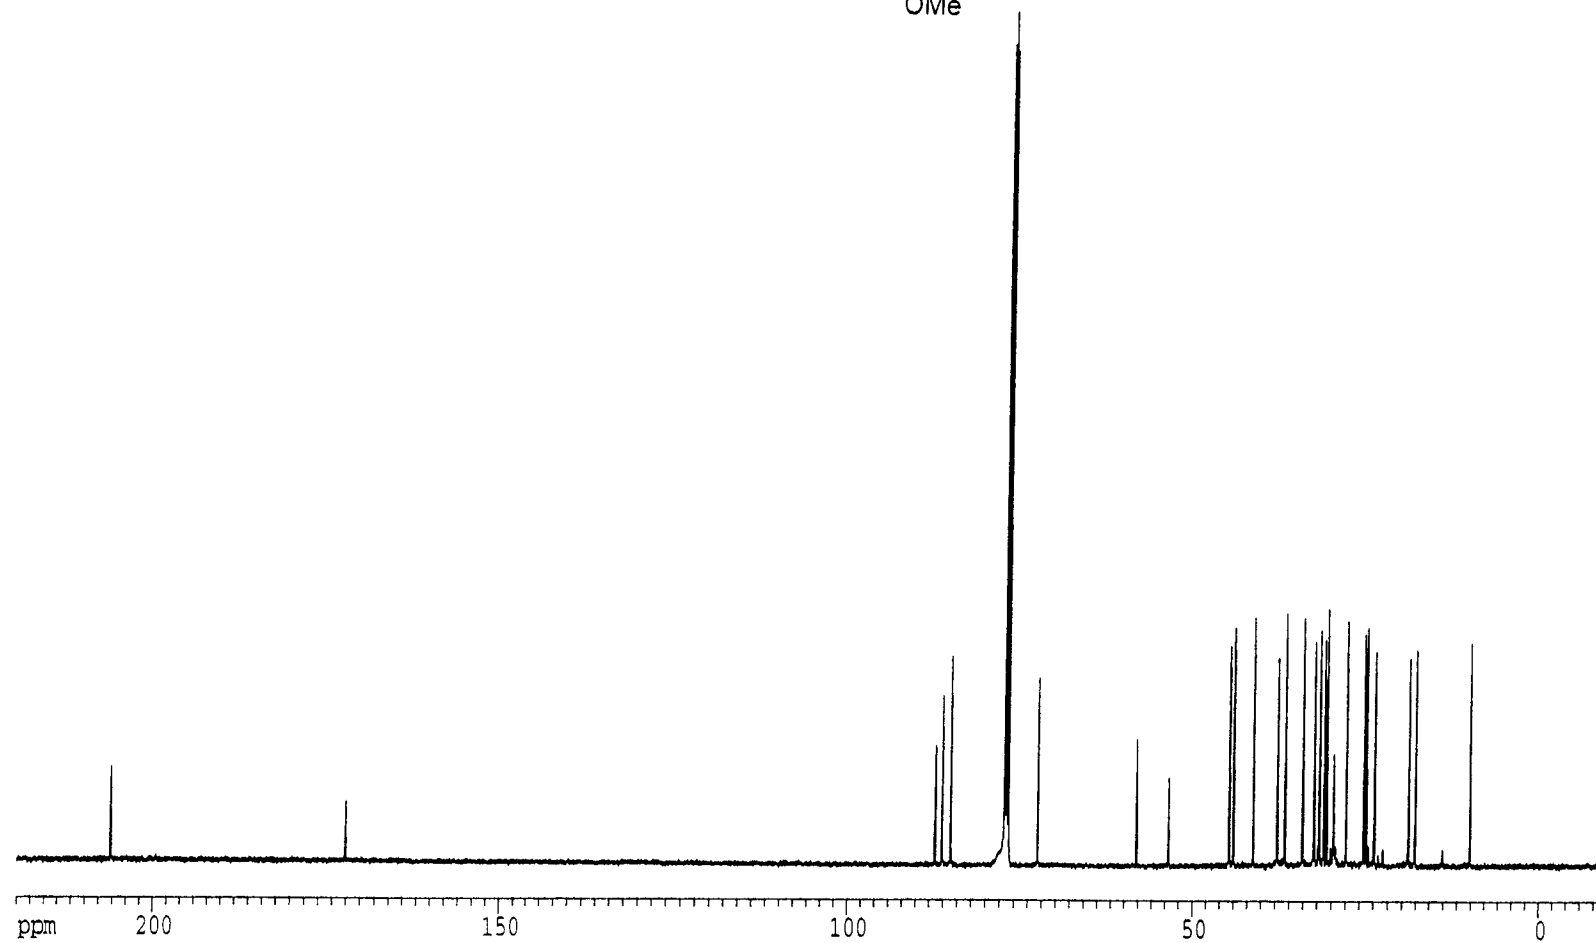

(-)-80

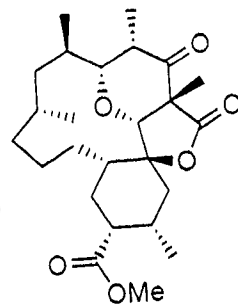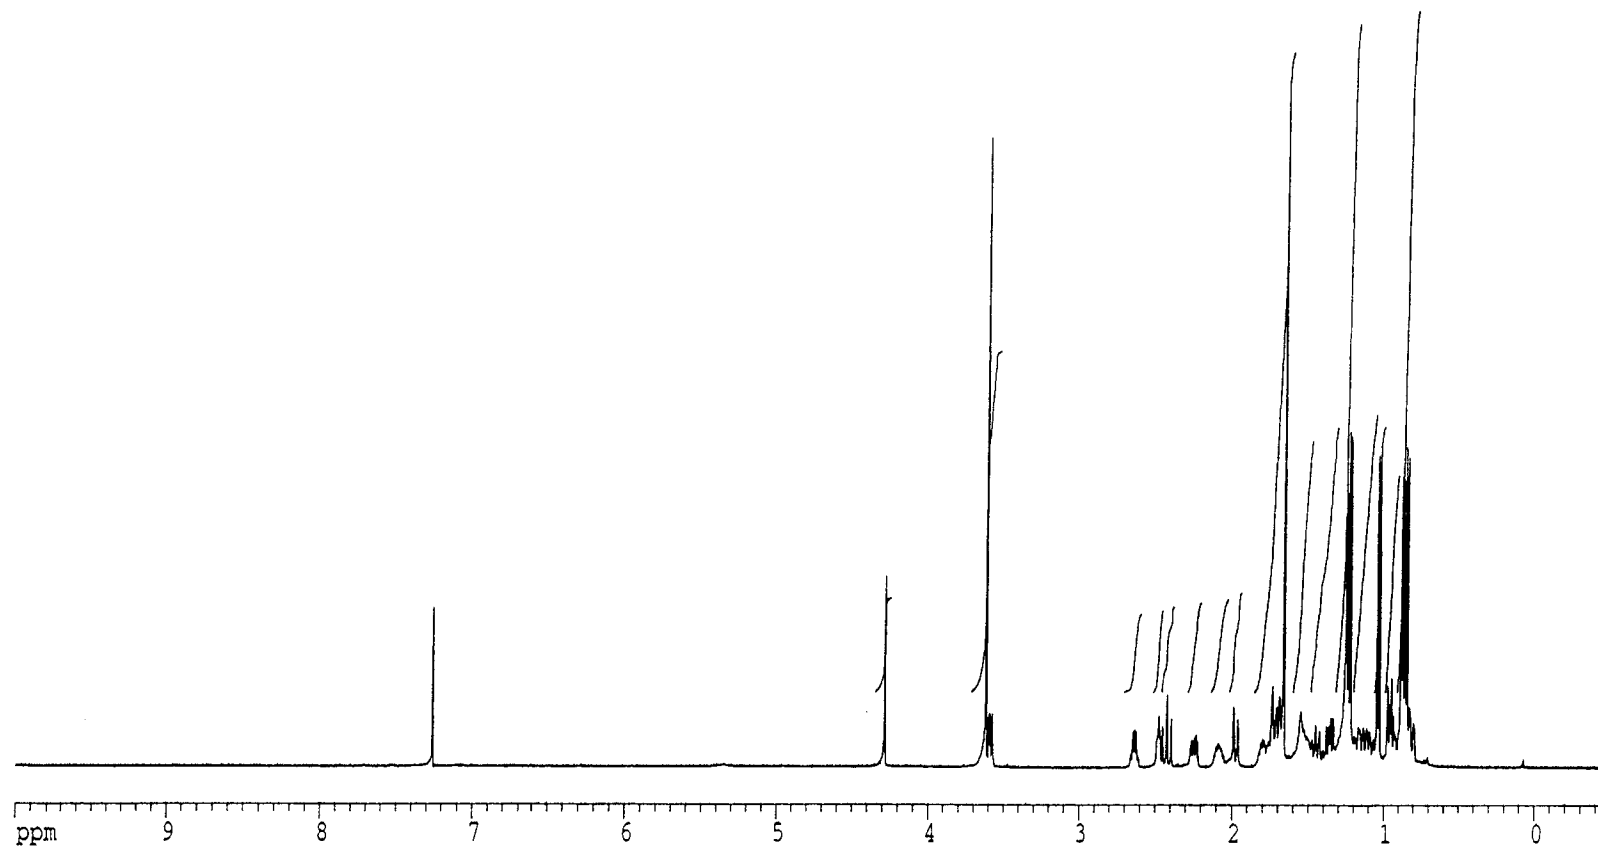

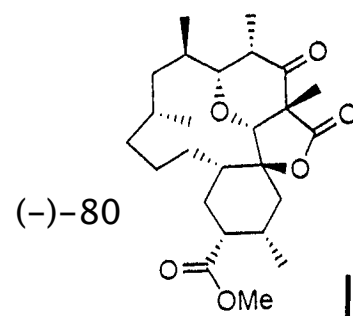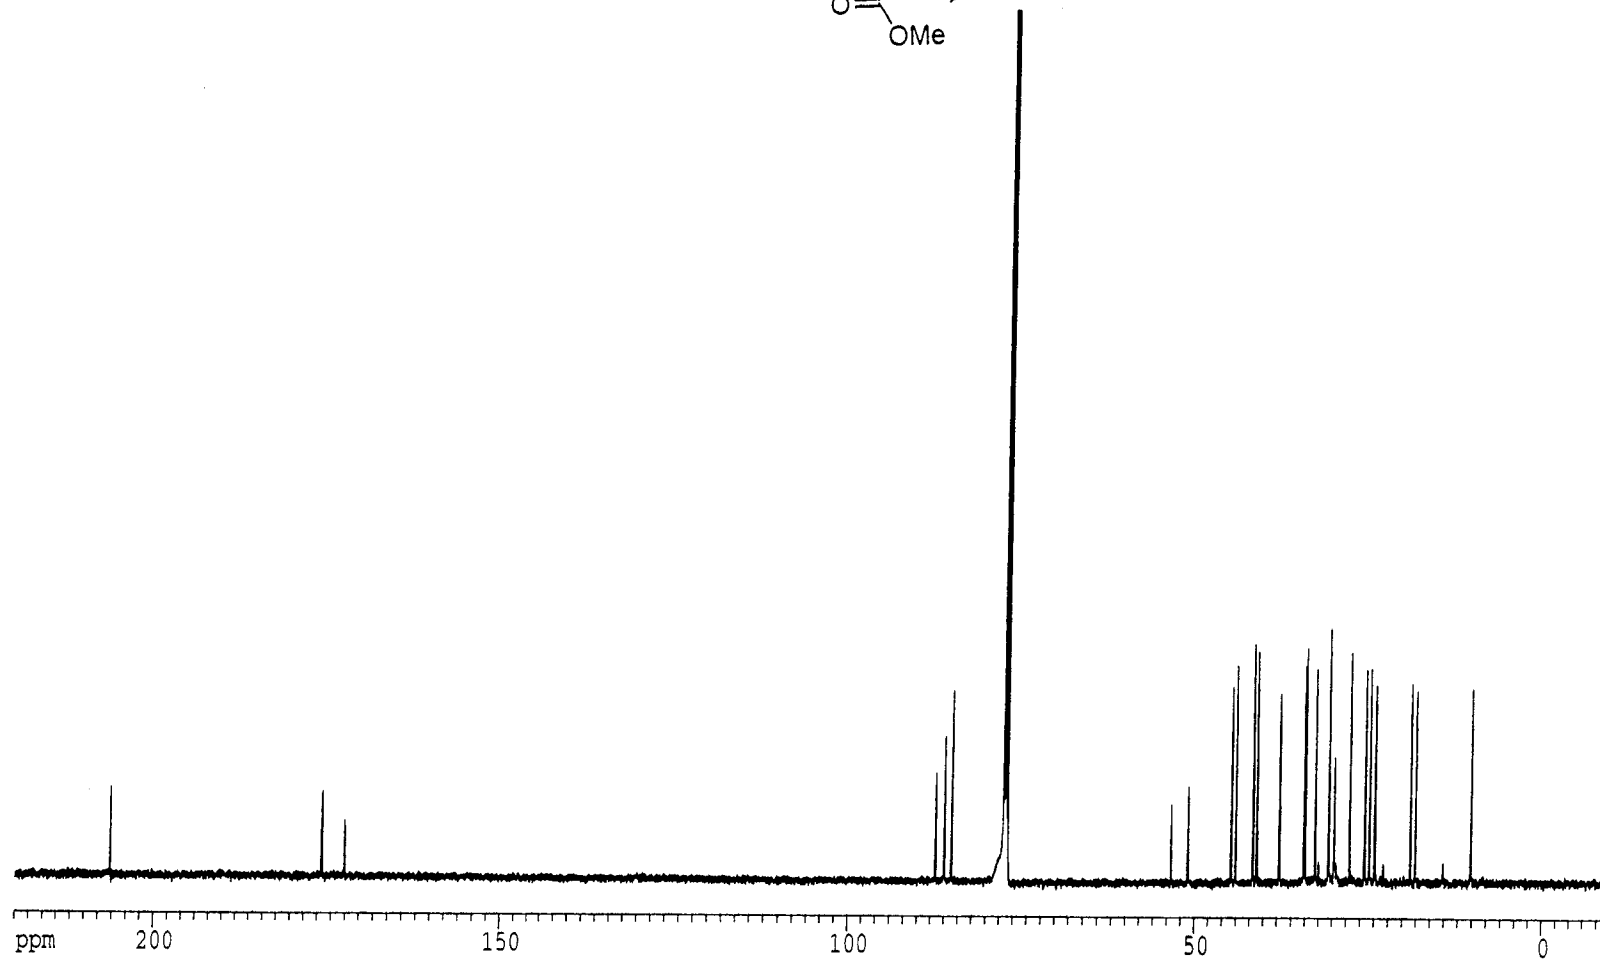

(-)-90

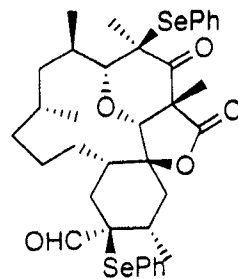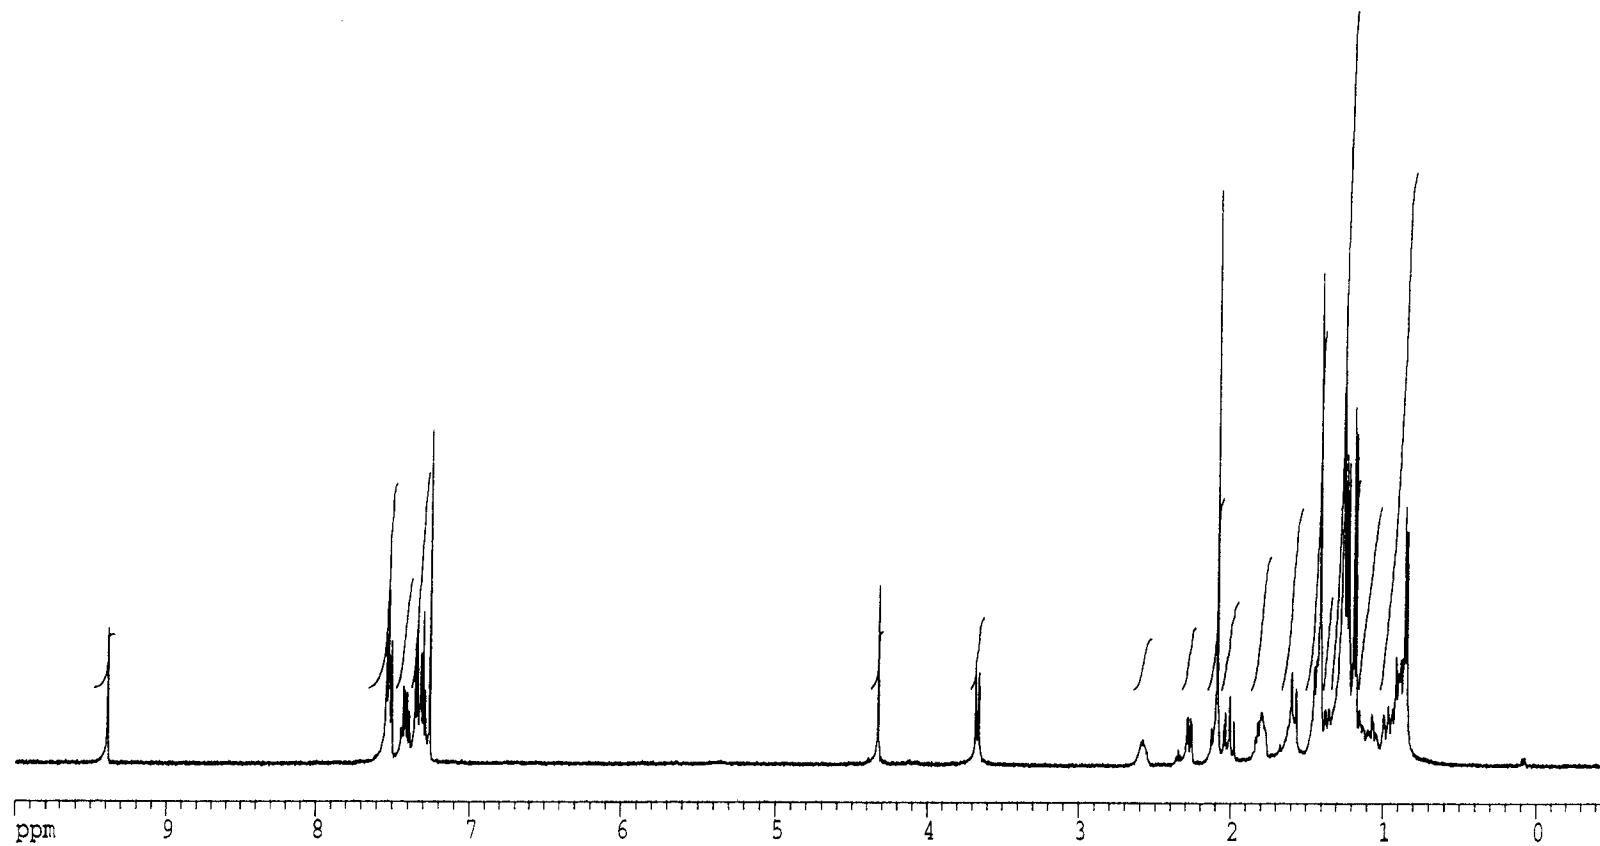

(-)-90

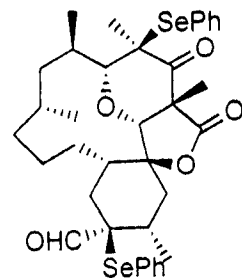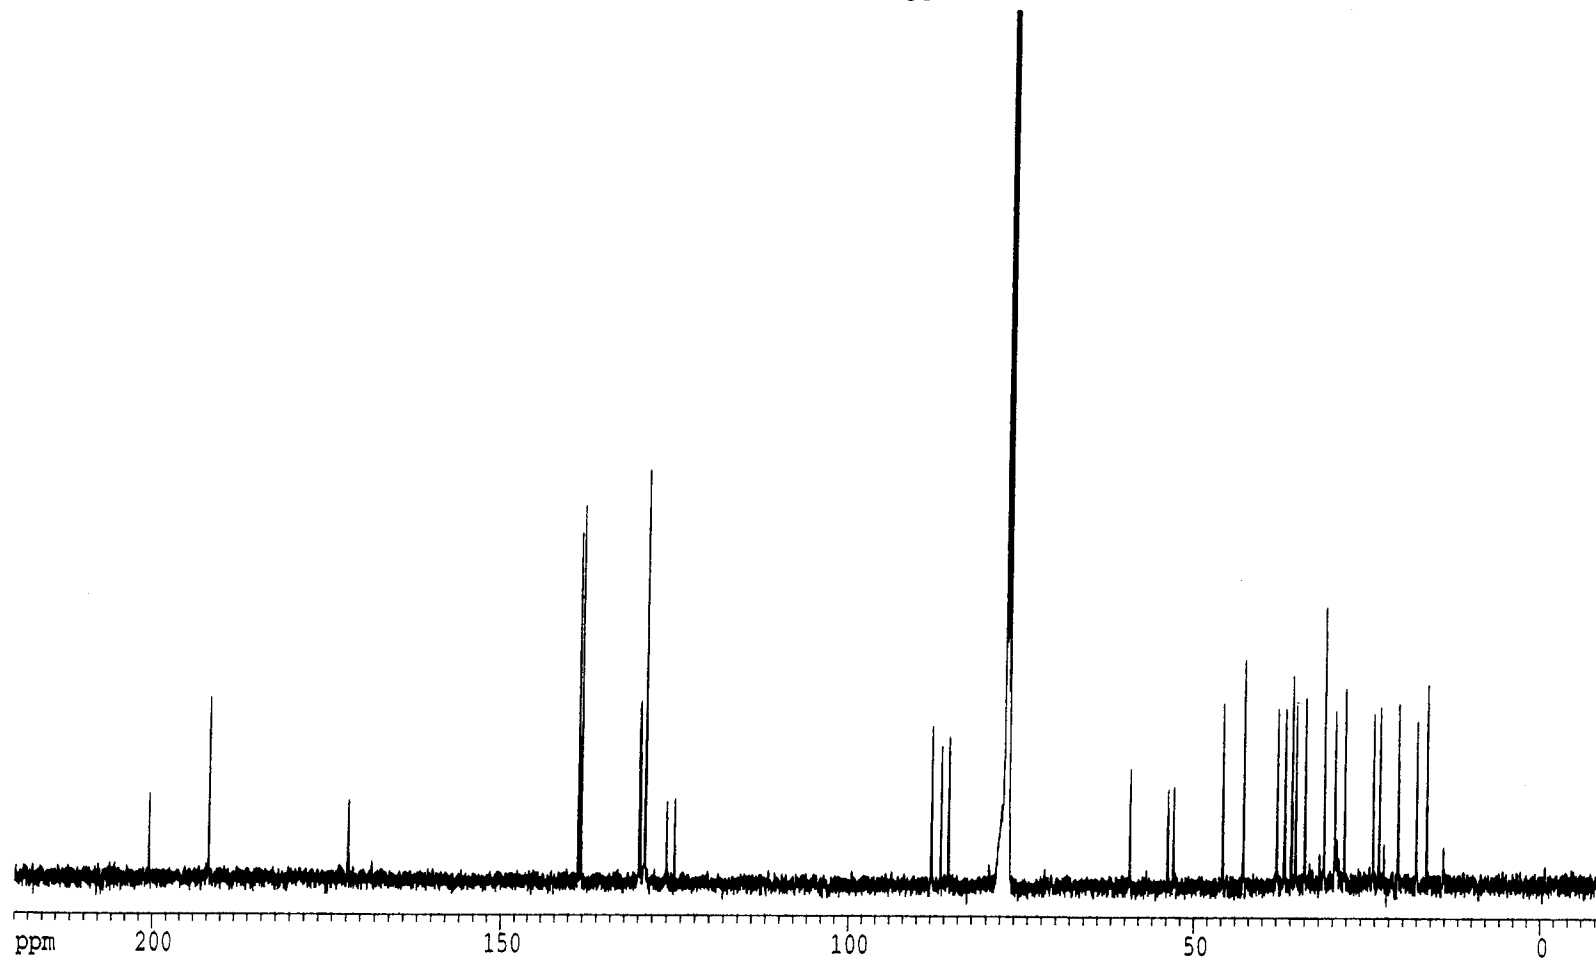

(-)-91

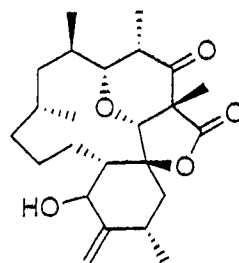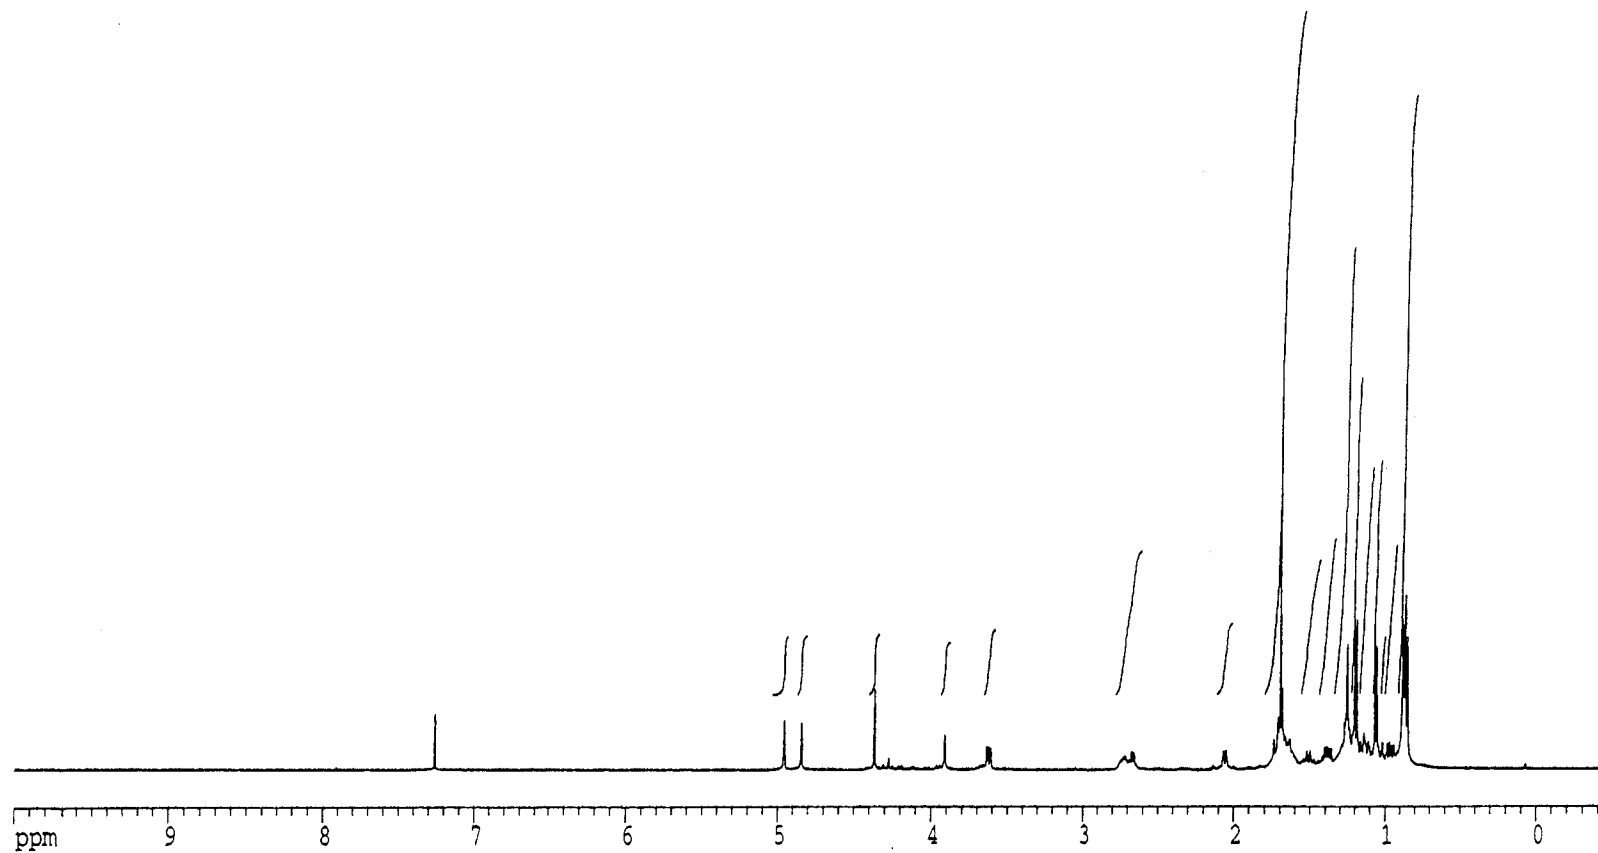

(-)-91

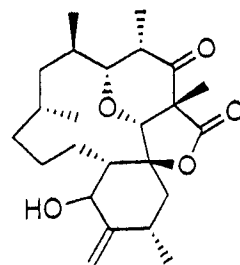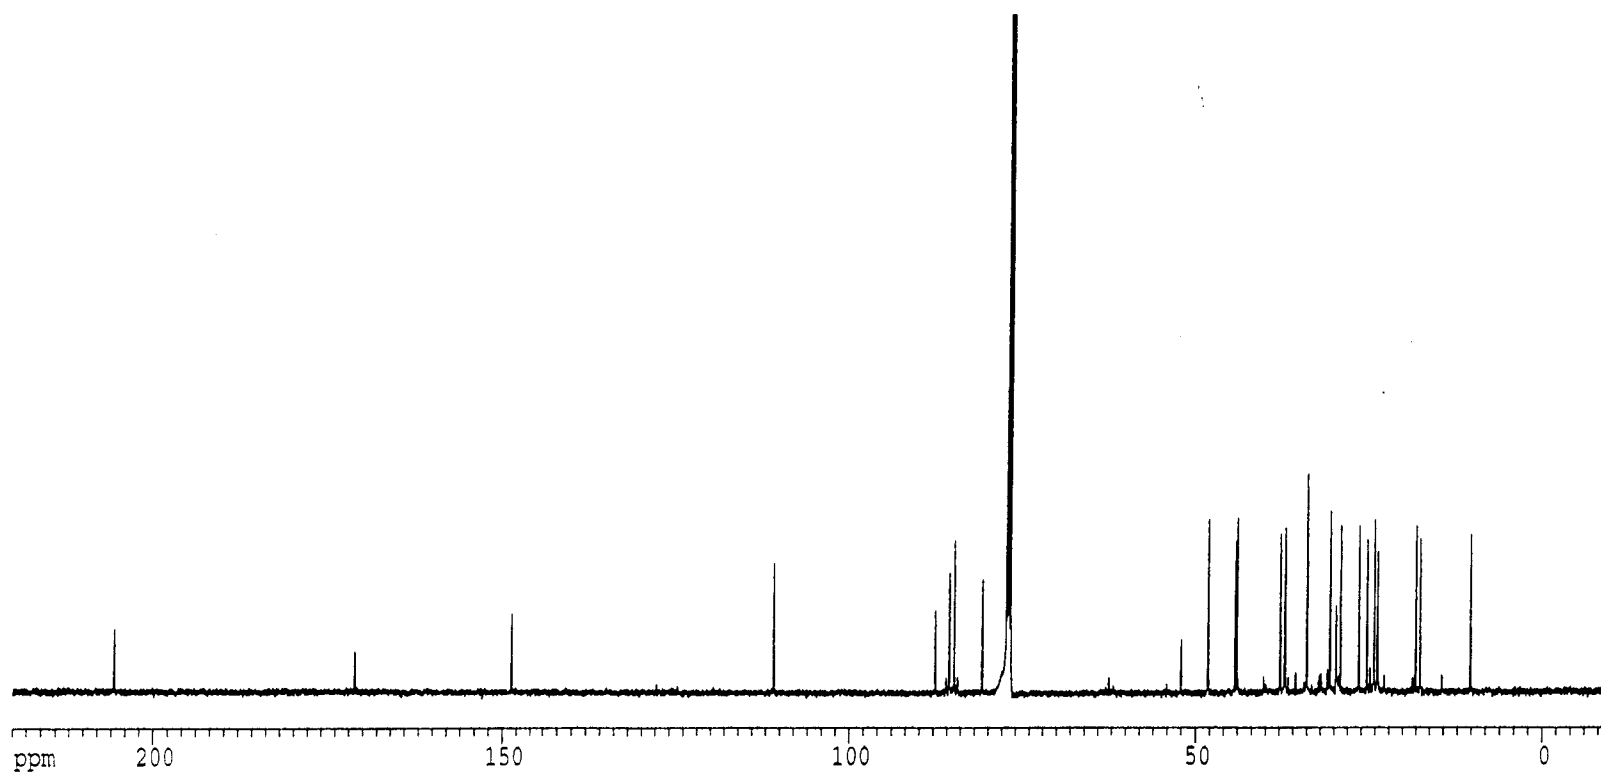

(-)-93

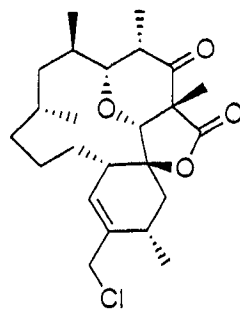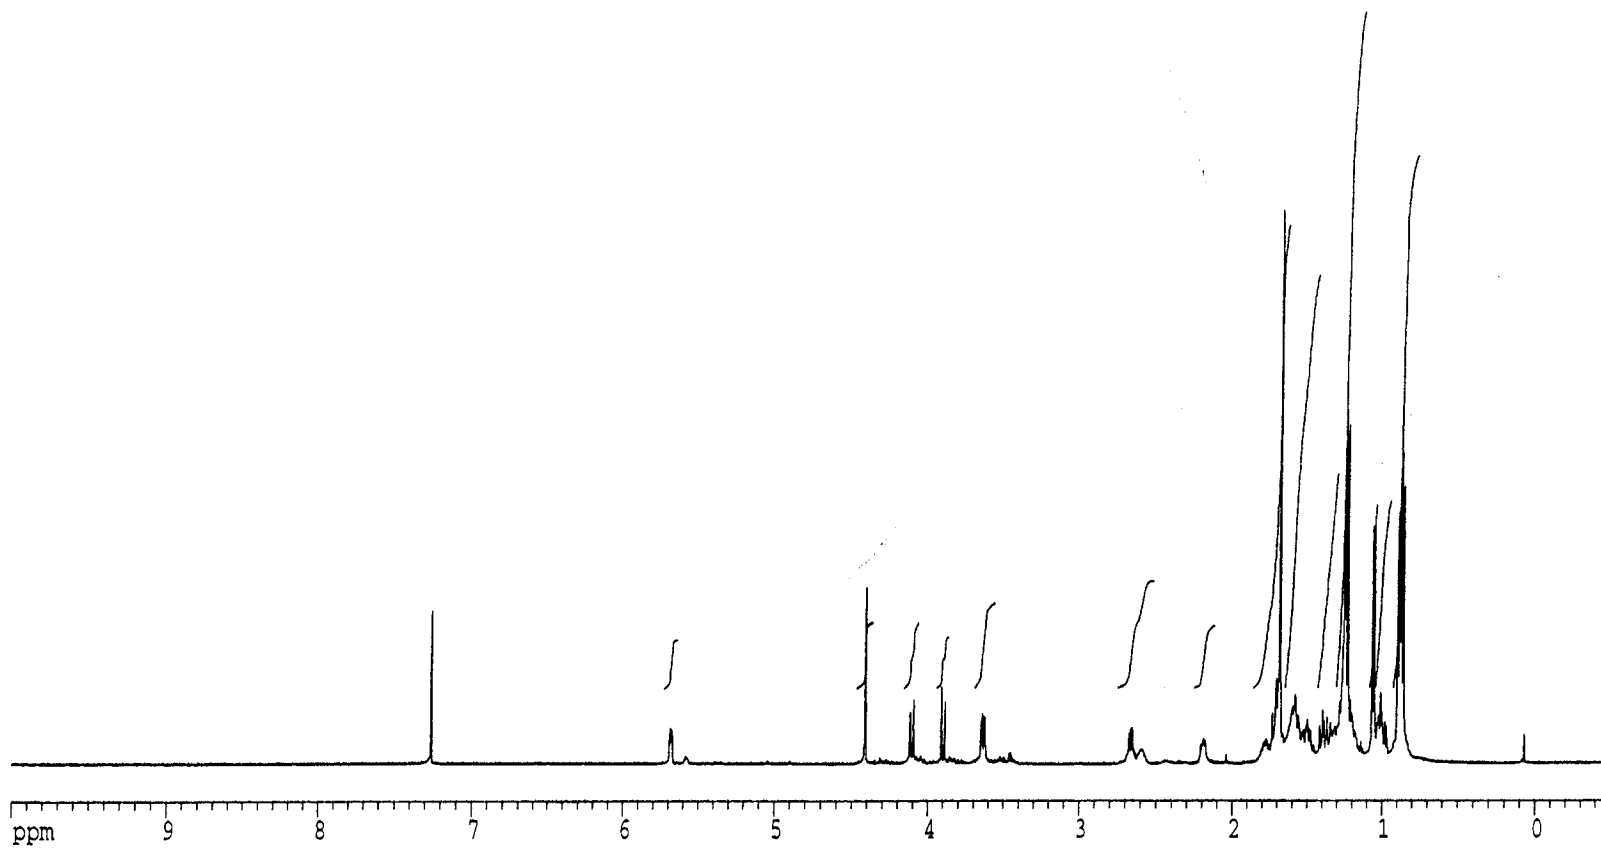

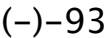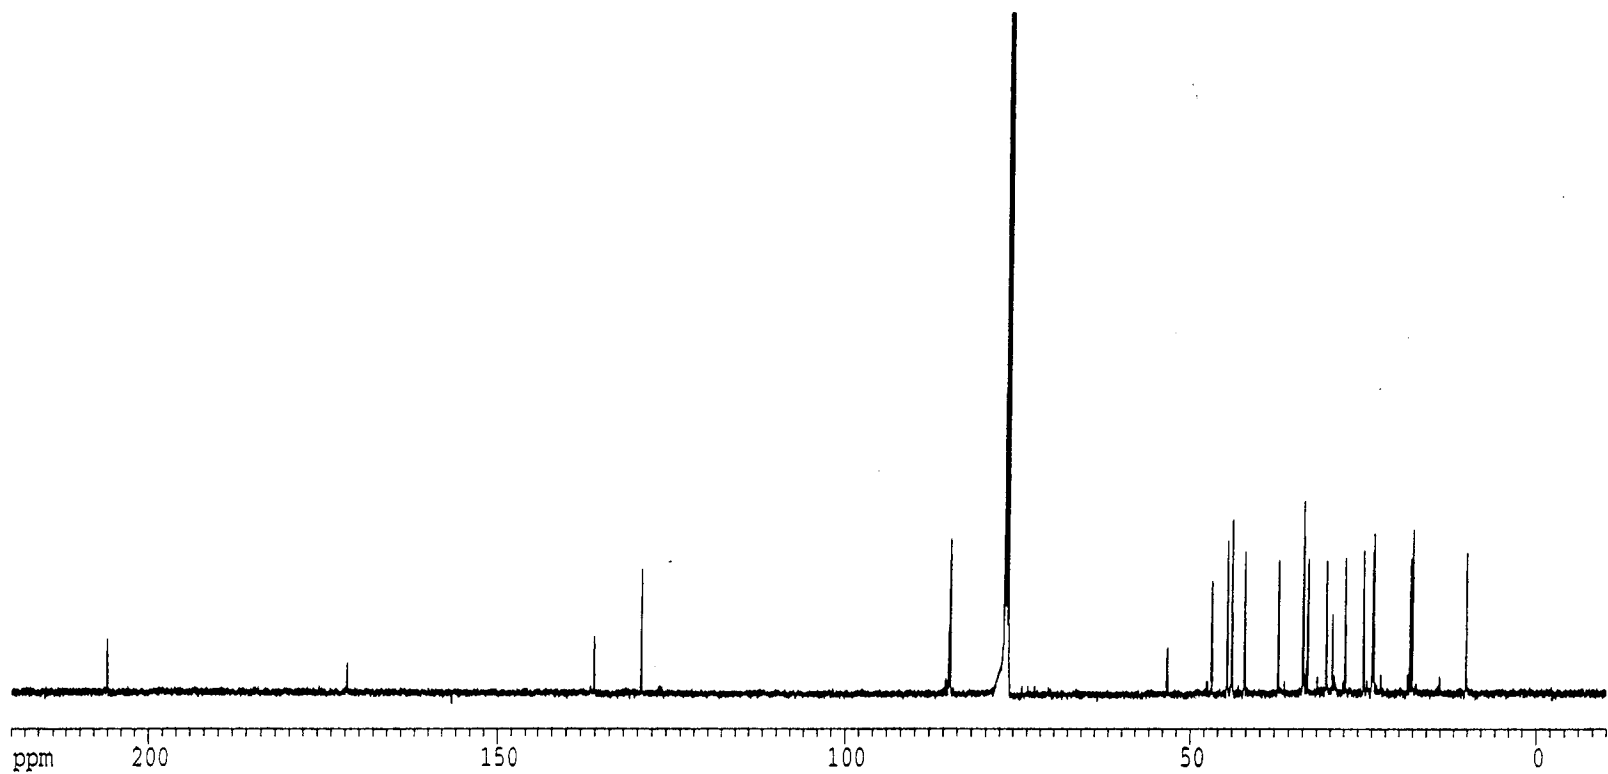

(-)-94

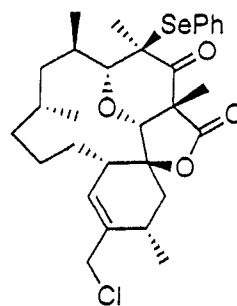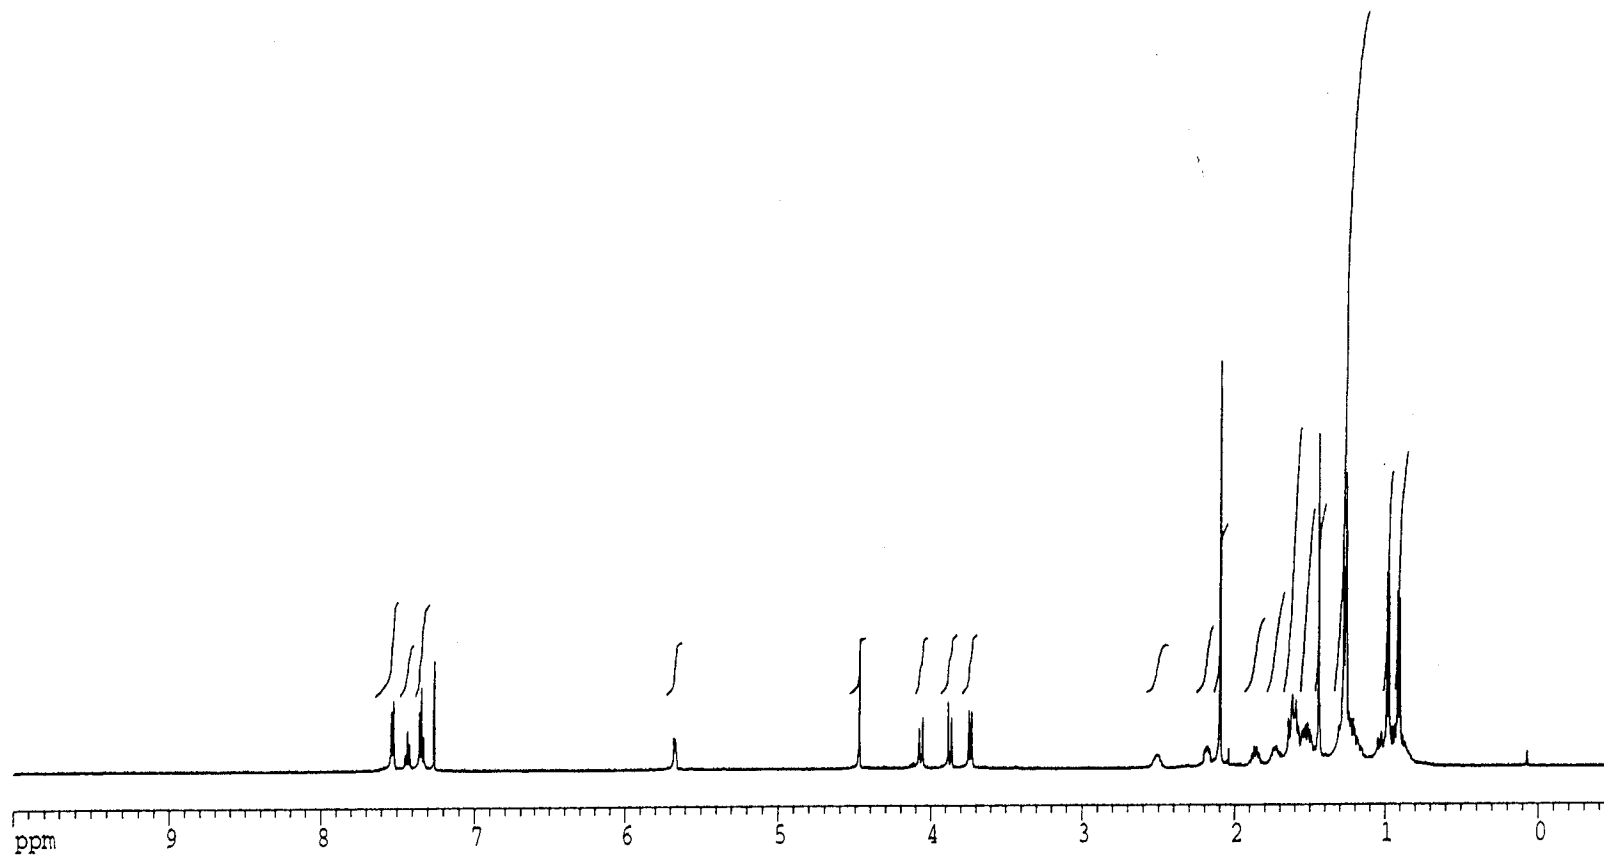

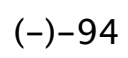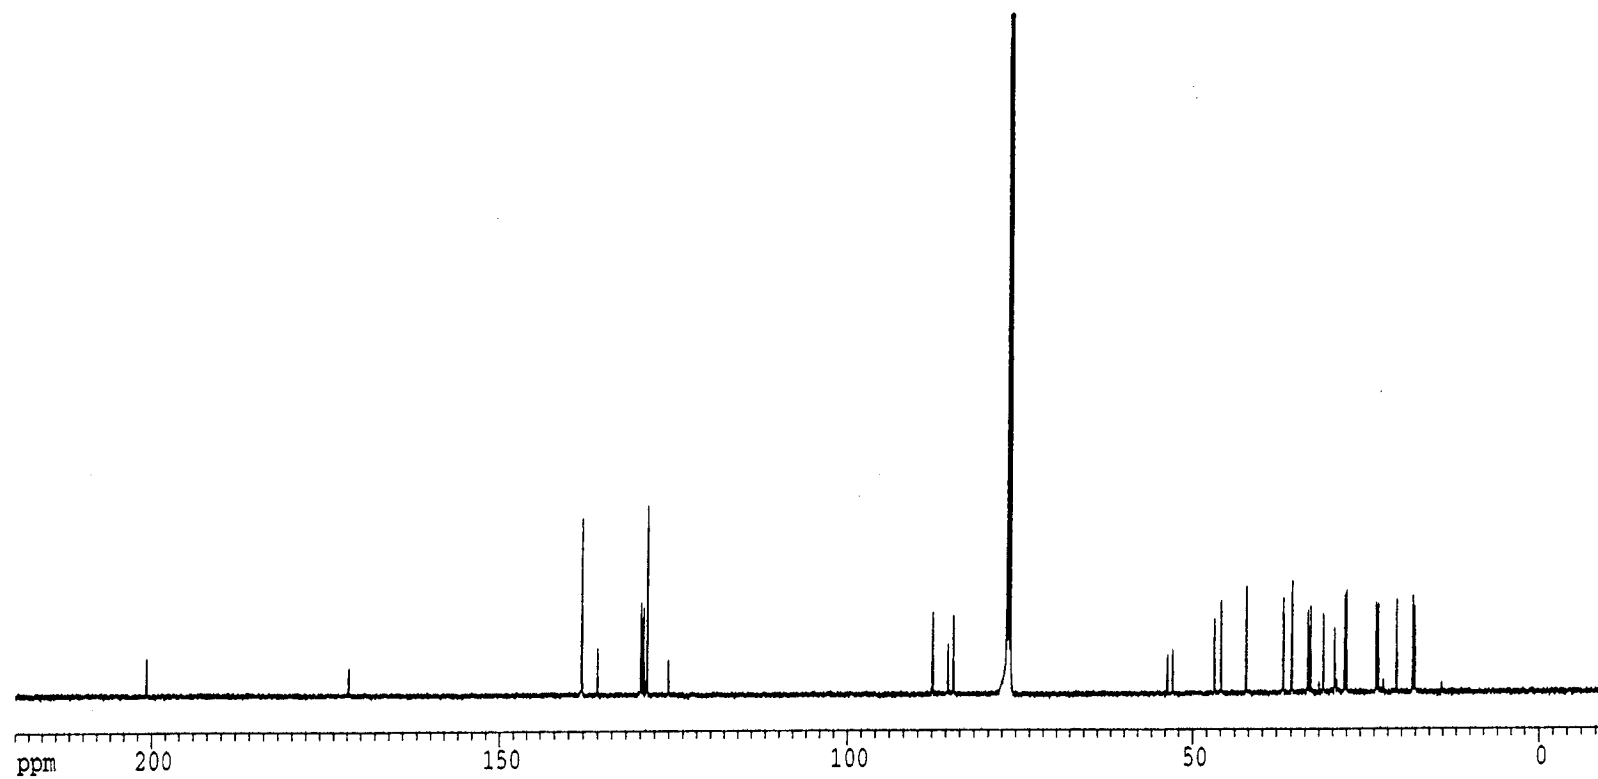

(-)-95

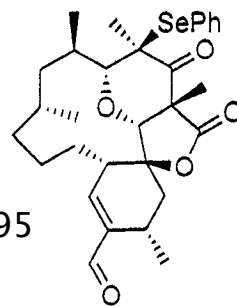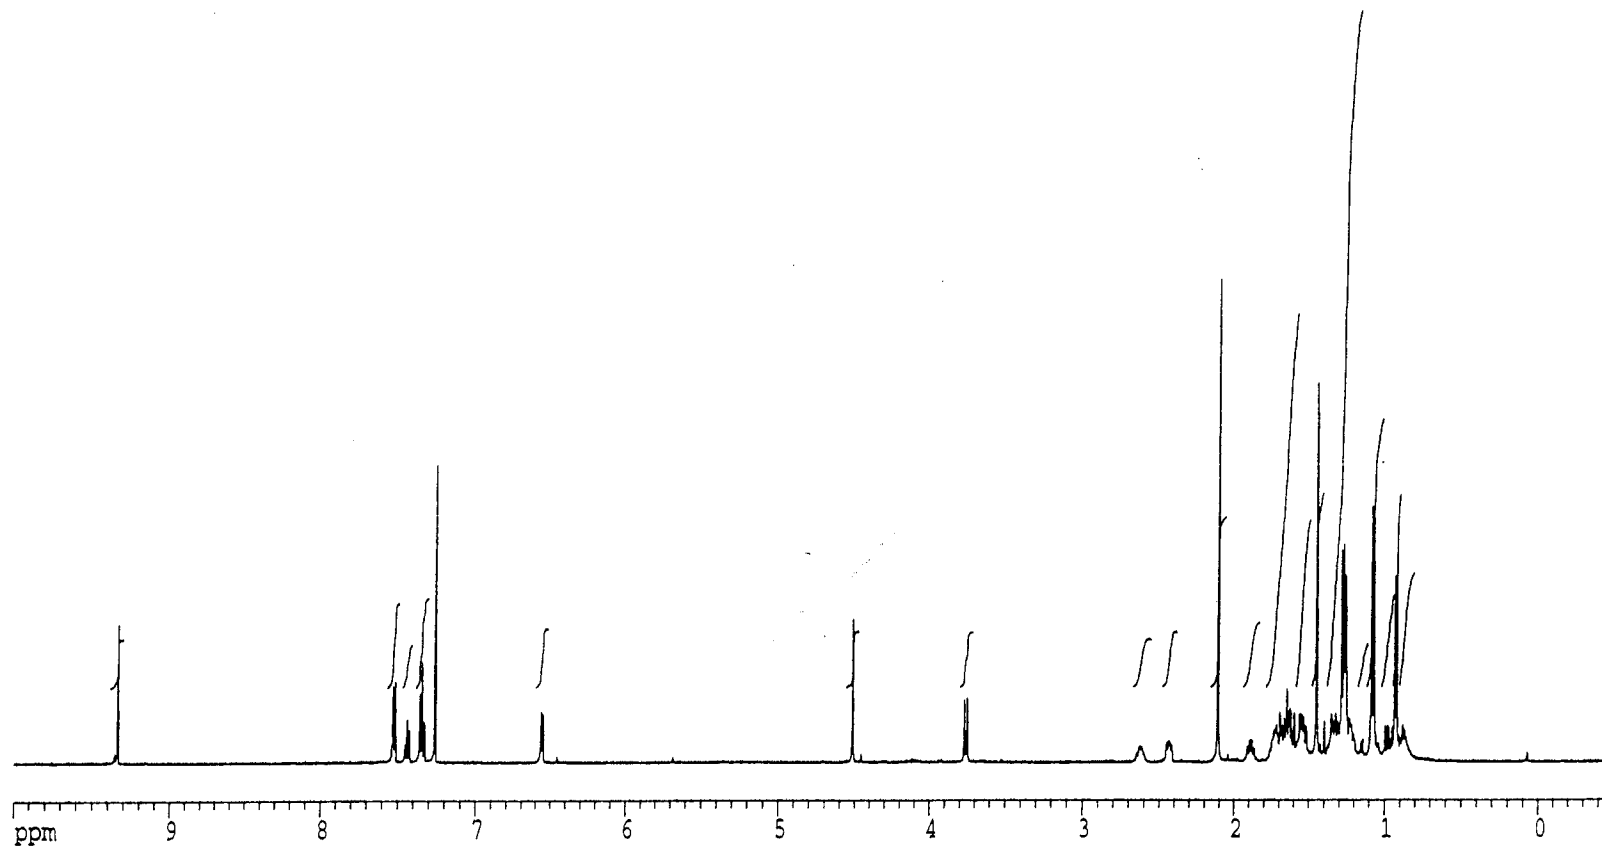

(-)-95

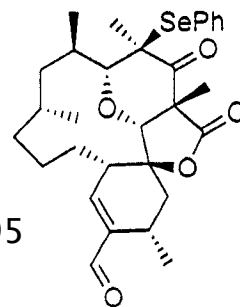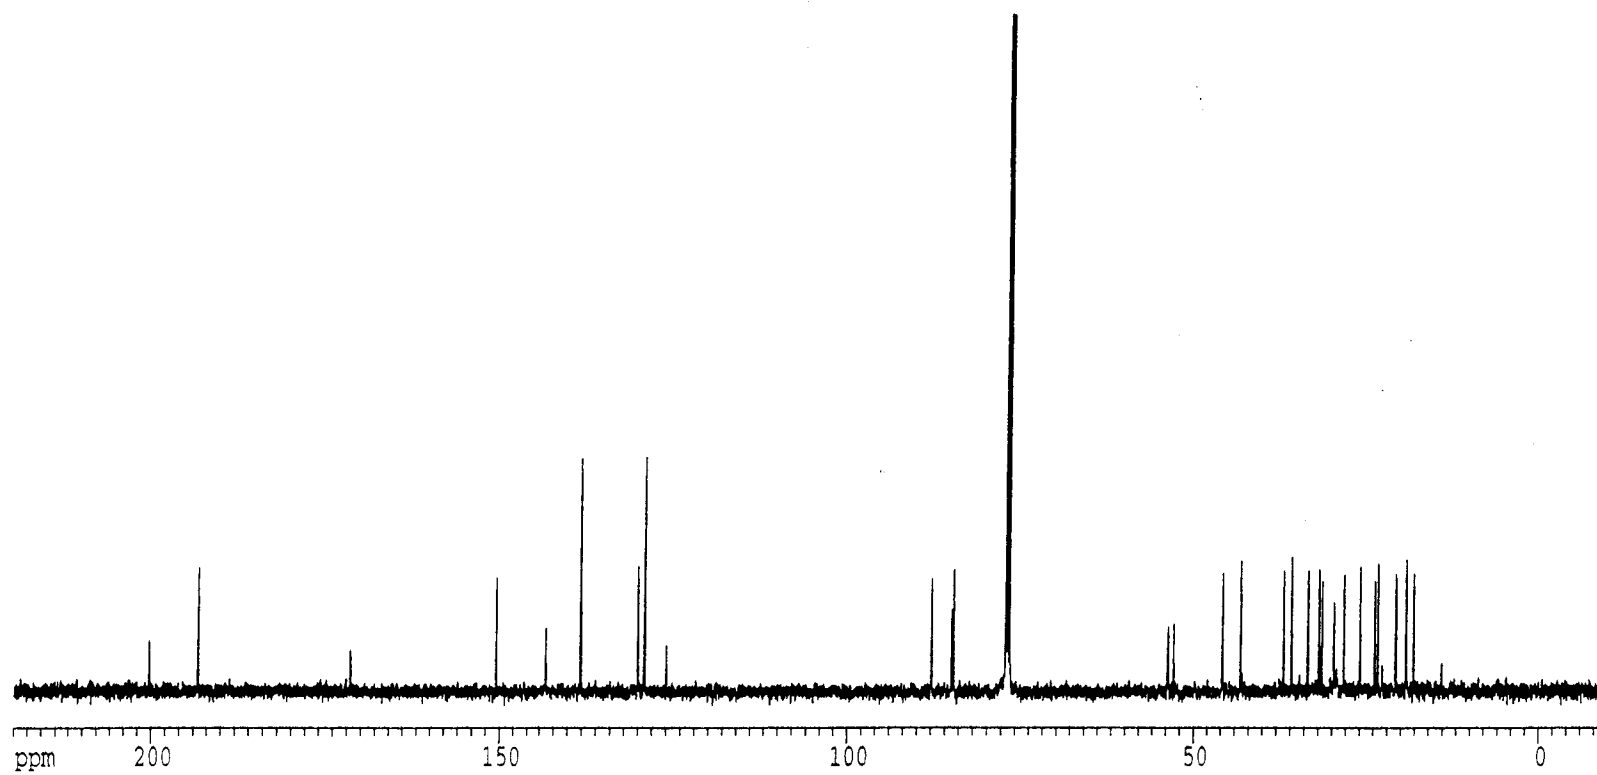

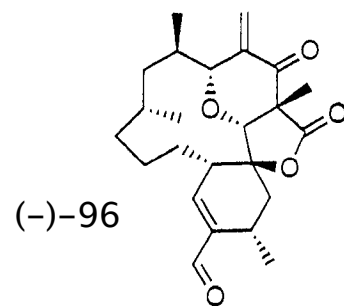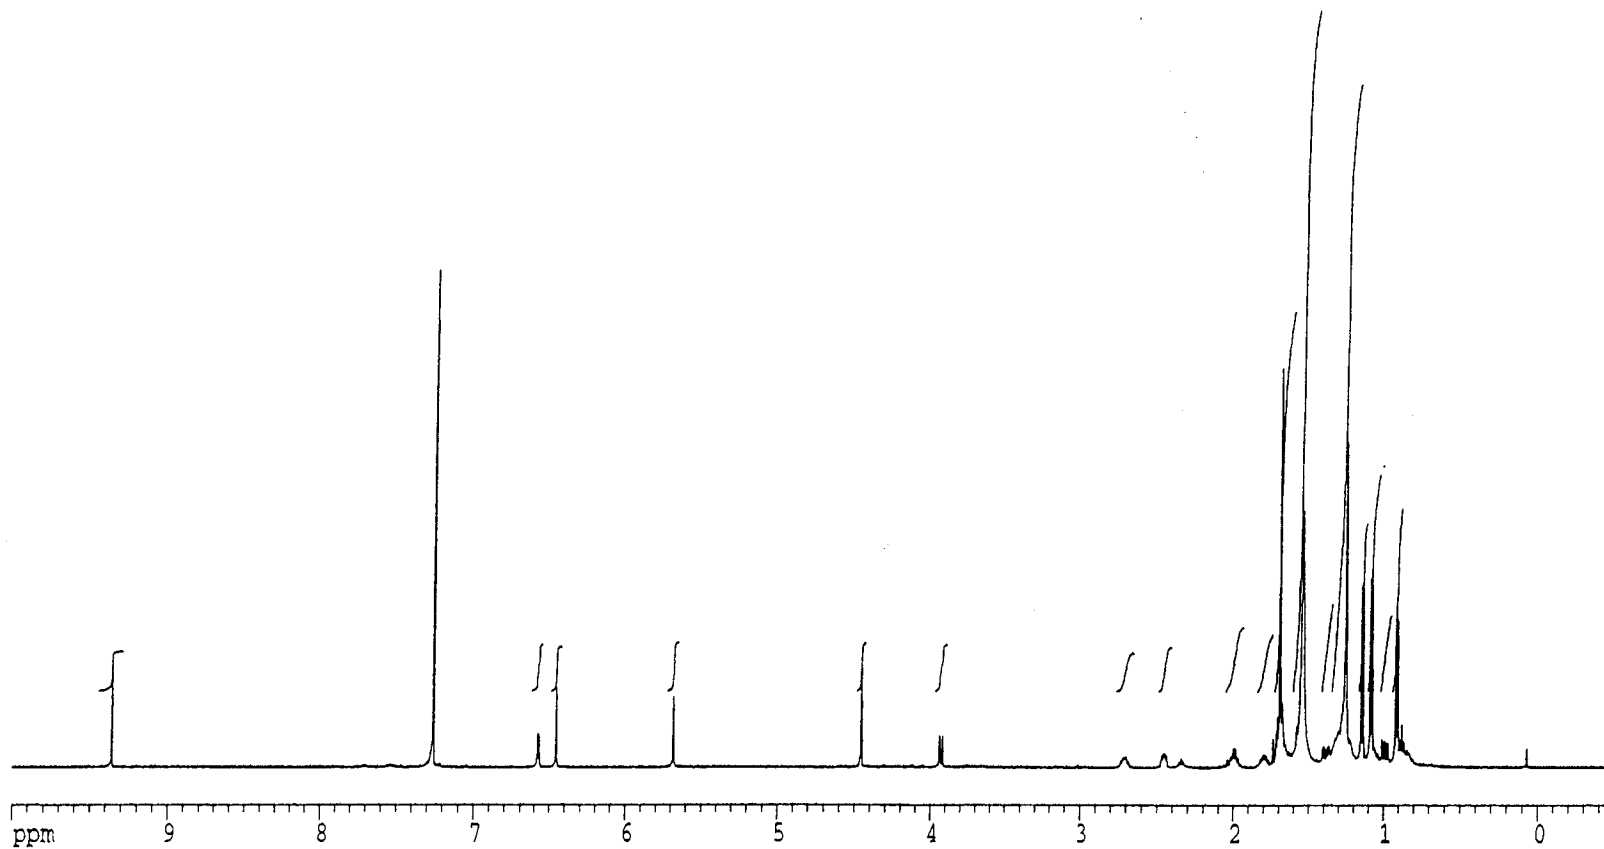

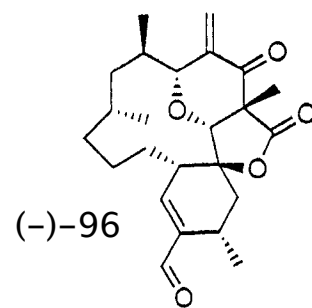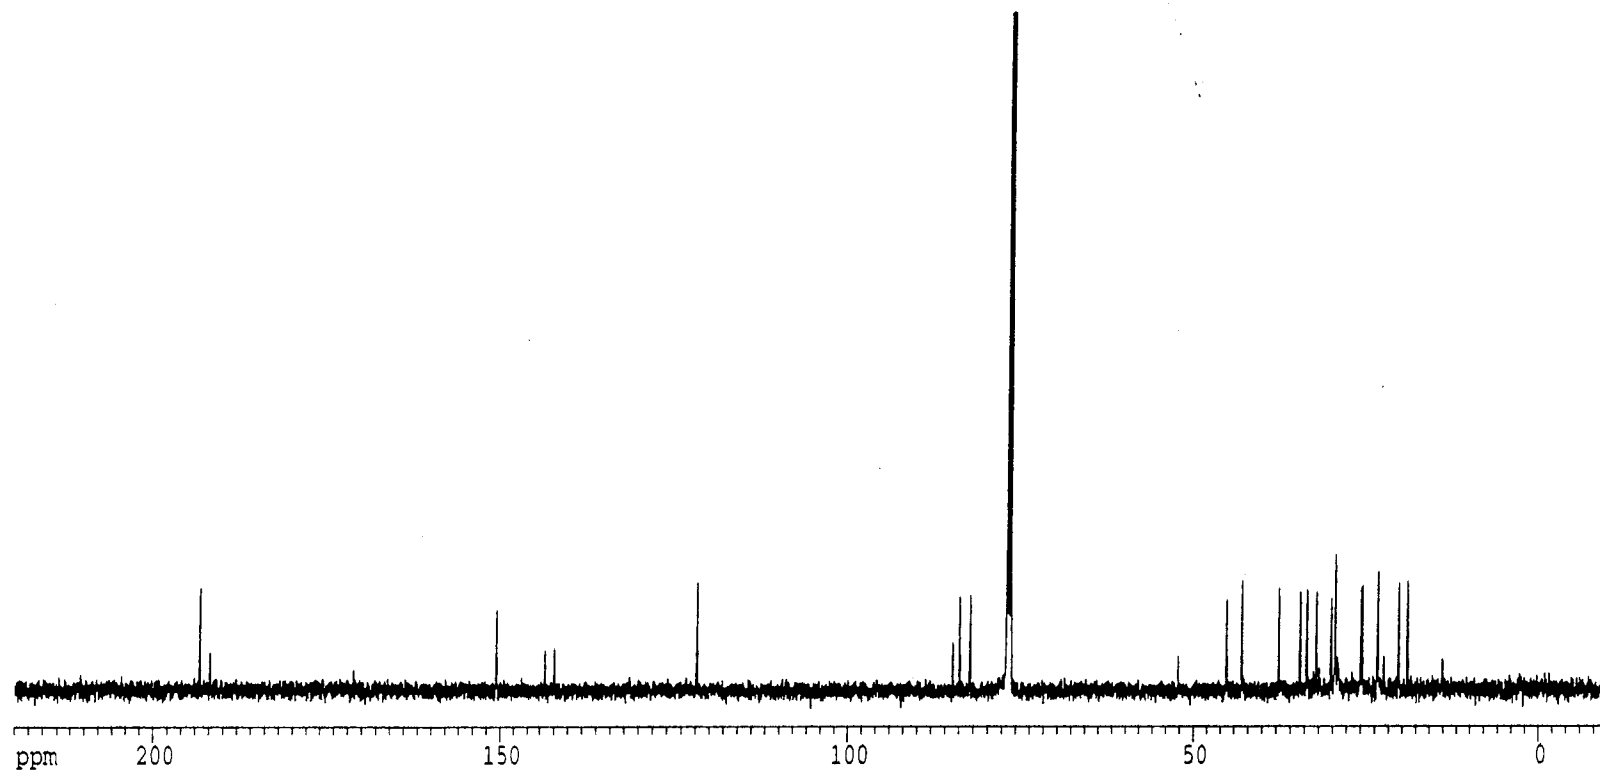

(-)-1

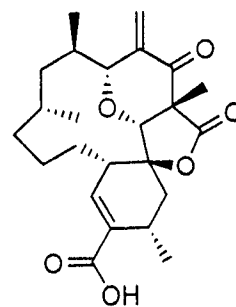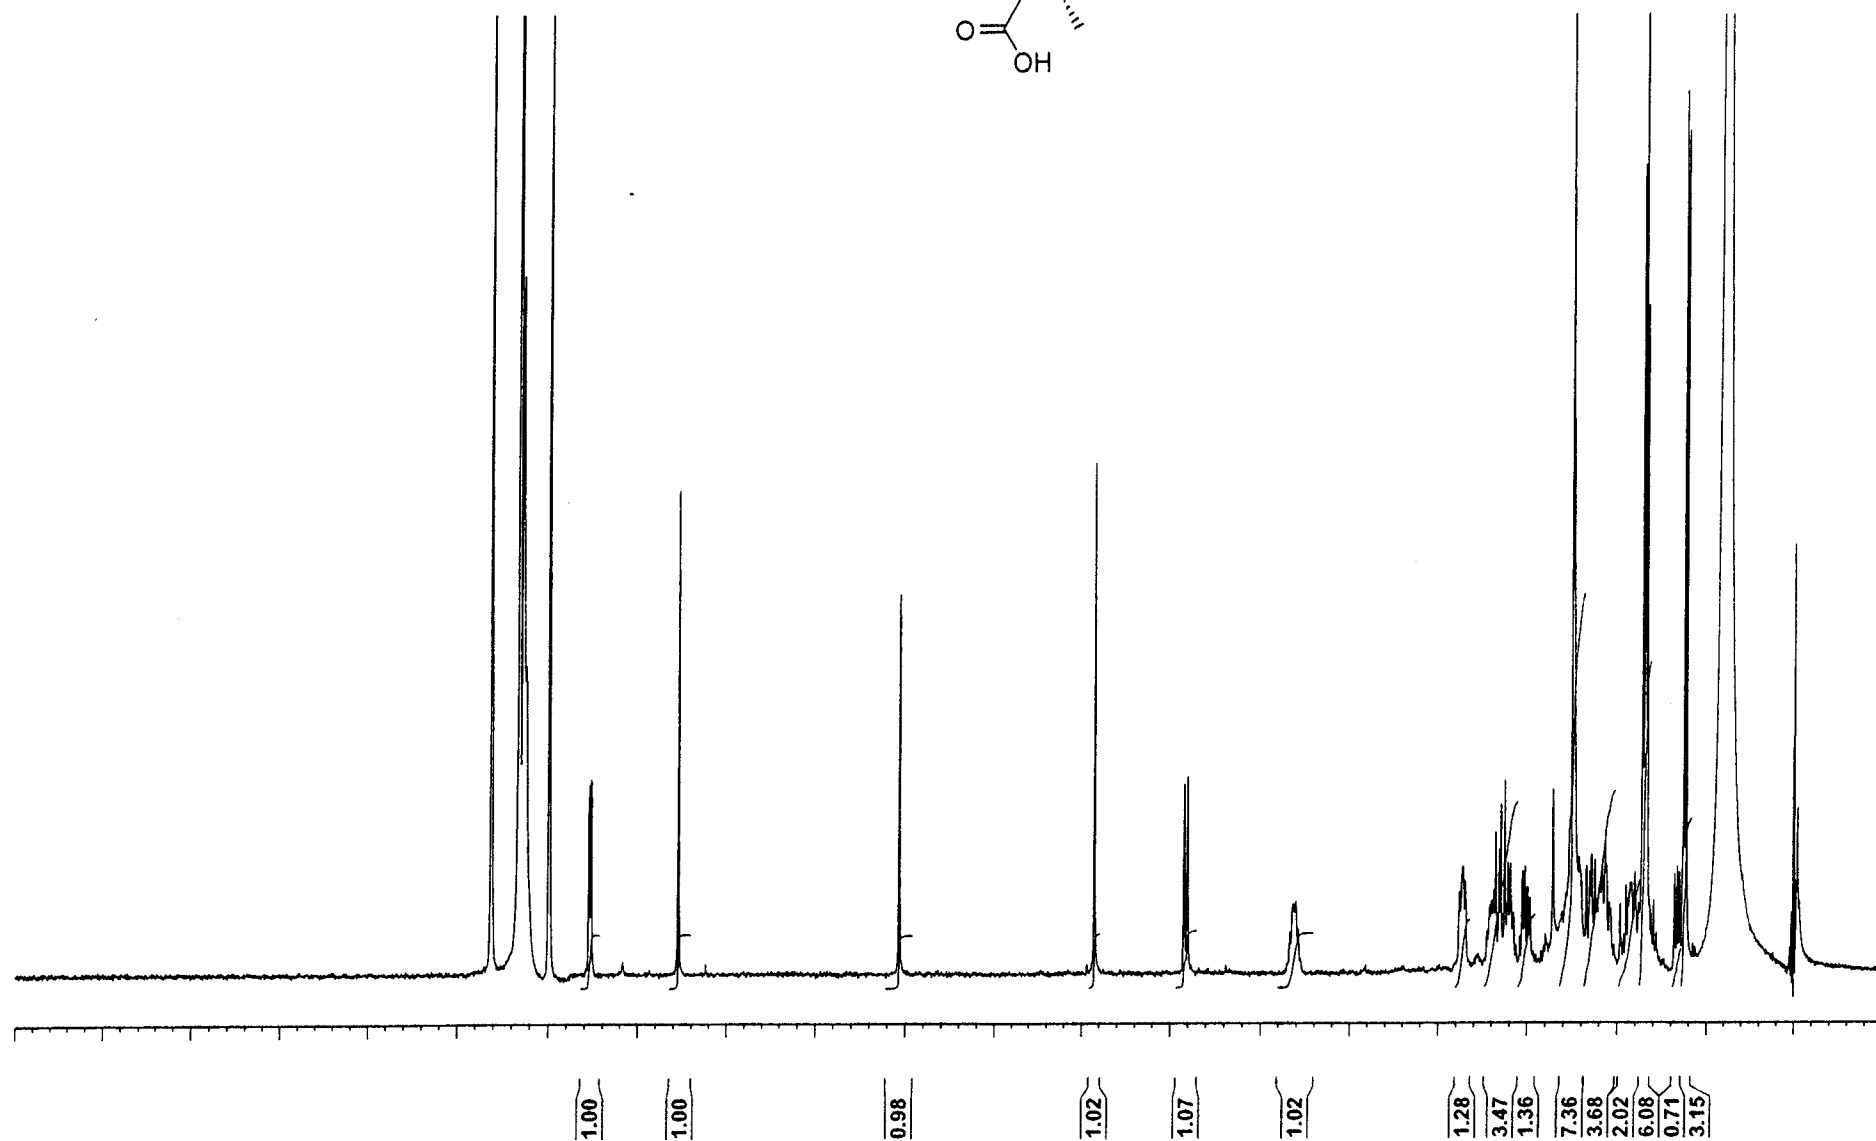

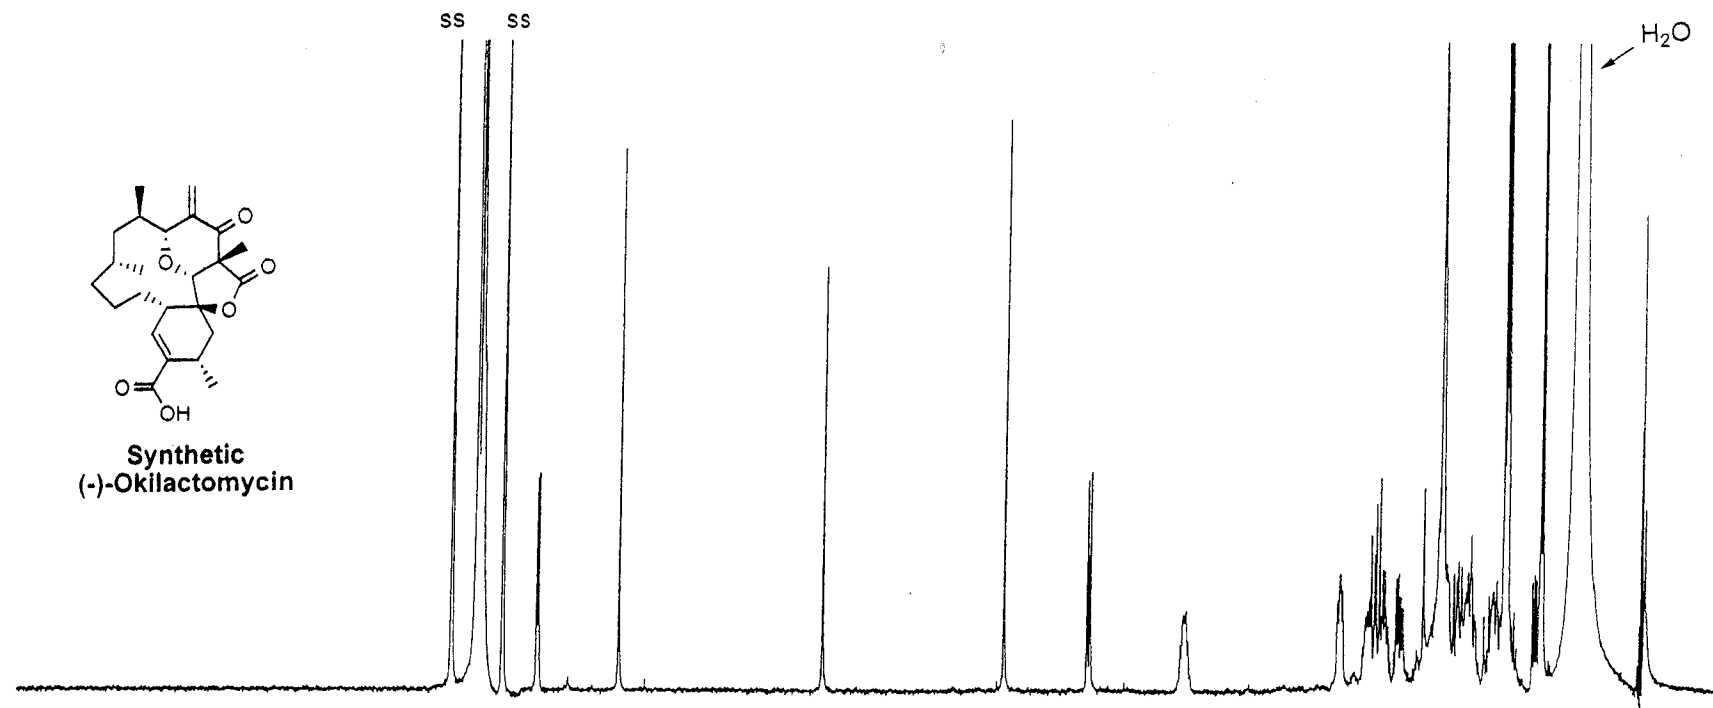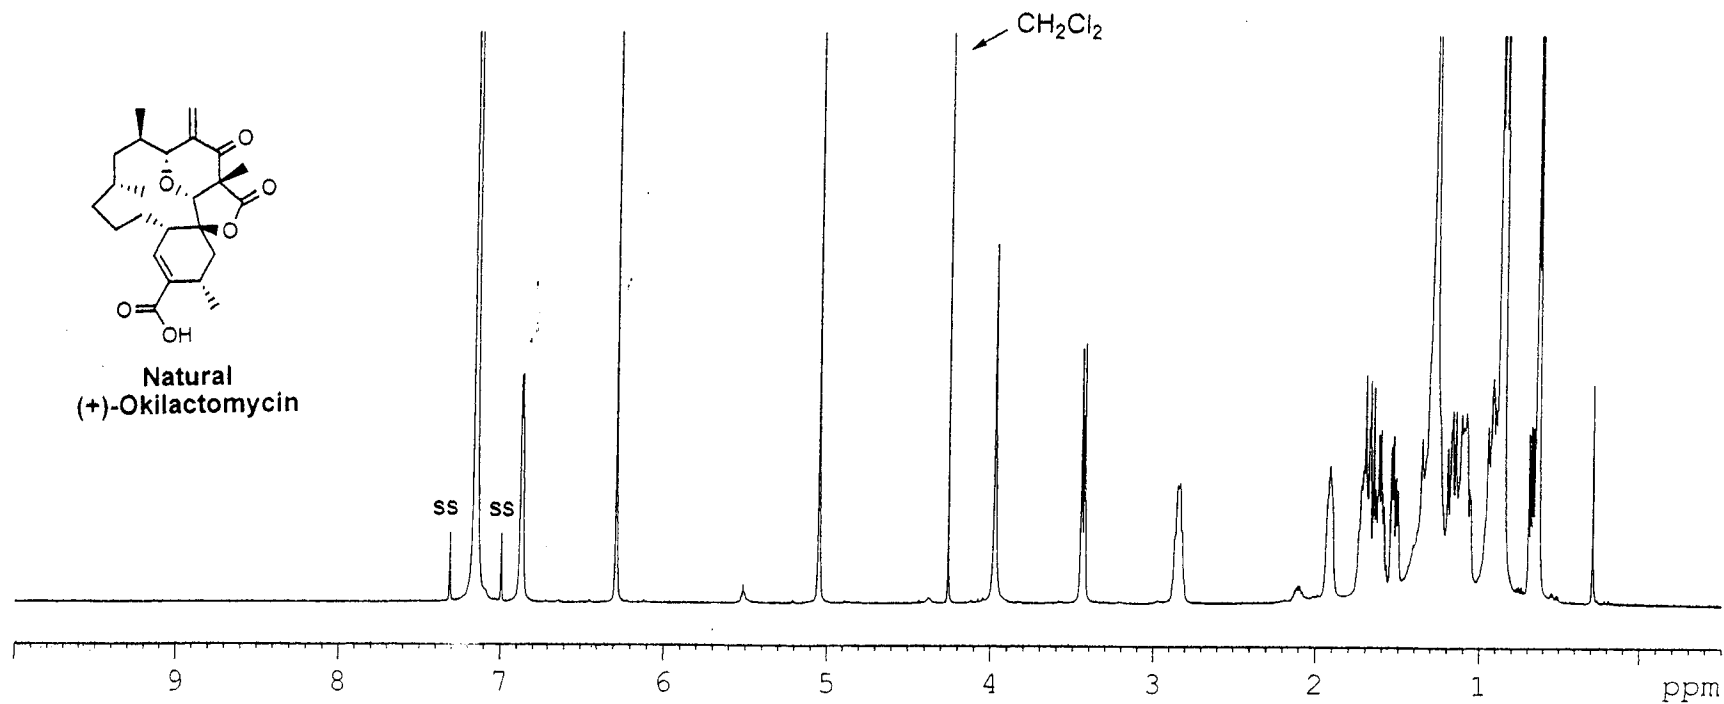

Supplement: NIHMS91372-supplement-2_si_002.pdf [file NIHMS91372-supplement-2_si_002.pdf]
